# Supplementary material for: Genome-wide exploration of the molecular evolution and regulatory network of mitogen-activated protein kinase cascades upon multiple stresses in Brachypodium distachyon
Source: PubMed Central journal article supplement (PMC4404688; doi:10.1186/s12864-015-1452-1), 2015-03-24
Supplement: 12864_2015_1452_MOESM1_ESM.pdf [file 12864_2015_1452_MOESM1_ESM.pdf]

**Additional file 1. List of MAPK cascade kinase genes in *B. distachyon***

| Gene       | Score | Position              | Gene model   | Group | Size (aa) | Subcellular localization * | pI   | MW(kD) |
|------------|-------|-----------------------|--------------|-------|-----------|----------------------------|------|--------|
| BdMPK3     | 672   | Bd1:64739946-64742370 | Bradi1g65810 | A     | 369       | cyto                       | 5.46 | 42.87  |
| BdMPK4     | 719   | Bd3:34209148-34213422 | Bradi3g32000 | B     | 375       | cysk                       | 5.75 | 42.76  |
| BdMPK6     | 724   | Bd1:47836748-47843578 | Bradi1g49100 | A     | 391       | cysk                       | 5.5  | 44.20  |
| BdMPK7-1   | 688   | Bd1:29632402-29634667 | Bradi1g34030 | C     | 413       | chlo                       | 8.46 | 47.11  |
| BdMPK7-2   | N/A   | Bd4:30118480-30120192 | Bradi4g24912 | C     | 369       | cyto                       | 6.63 | 42.37  |
| BdMPK11    | 714   | Bd3:14742468-14745425 | Bradi3g16560 | B     | 387       | chlo                       | 6.24 | 43.96  |
| BdMPK14    | N/A   | Bd3:2521821-2525826   | Bradi3g03780 | C     | 369       | cyto                       | 6.5  | 42.32  |
| BdMPK16    | 972   | Bd2:36786589-36792652 | Bradi2g36470 | D     | 544       | cyto                       | 8.77 | 61.60  |
| BdMPK17    | 951   | Bd1:30307750-30312635 | Bradi1g34700 | D     | 581       | cyto                       | 6.81 | 65.49  |
| BdMPK20-1  | 1070  | Bd2:44852084-44858179 | Bradi2g44350 | D     | 615       | nucl                       | 9.1  | 69.95  |
| BdMPK20-2  | N/A   | Bd2:13689255-13693771 | Bradi2g15317 | D     | 597       | cysk                       | 9.14 | 66.75  |
| BdMPK20-3  | 727   | Bd1:38419711-38433437 | Bradi1g41780 | D     | 421       | cyto                       | 8.72 | 48.62  |
| BdMPK20-4  | 998   | Bd2:46302880-46308387 | Bradi2g45870 | D     | 580       | cyto                       | 9.38 | 66.39  |
| BdMPK20-5  | N/A   | Bd2:14412074-14417497 | Bradi2g16337 | D     | 581       | cysk                       | 9.33 | 66.41  |
| BdMPK21-1  | 904   | Bd2:13875717-13880863 | Bradi2g15620 | D     | 595       | chlo                       | 6.62 | 67.14  |
| BdMPK21-2  | 832   | Bd2:45394037-45403577 | Bradi2g45010 | D     | 577       | cyto                       | 9.04 | 66.41  |
| BdMKK1     | 617   | Bd1:49443017-49446304 | Bradi1g51000 | A     | 348       | nucl                       | 5.46 | 38.65  |
| BdMKK3-1   | N/A   | Bd4:44107411-44111847 | Bradi4g39490 | B     | 523       | cyto                       | 5.7  | 58.46  |
| BdMKK3-2   | 979   | Bd1:38580168-38590500 | Bradi1g41860 | B     | 523       | cyto                       | 5.66 | 58.60  |
| BdMKK3-3   | N/A   | Bd3:9689290-9697559   | Bradi3g11260 | B     | 567       | cyto                       | 5.74 | 63.33  |
| BdMKK4     | 558   | Bd3:54258852-54260320 | Bradi3g53650 | D     | 357       | chlo                       | 9.47 | 38.43  |
| BdMKK5     | 536   | Bd1:45433080-45434736 | Bradi1g46880 | D     | 343       | mito                       | 9.21 | 36.99  |
| BdMKK6     | 660   | Bd1:72118481-72123498 | Bradi1g75150 | A     | 356       | cyto                       | 5.52 | 39.96  |
| BdMKK10-1  | 408   | Bd1:8573765-8574808   | Bradi1g11525 | C     | 347       | chlo                       | 7.65 | 36.88  |
| BdMKK10-2  | 391   | Bd1:67832493-67833815 | Bradi1g69400 | C     | 340       | mito                       | 6.56 | 36.09  |
| BdMKK10-3  | 390   | Bd1:7865287-7866321   | Bradi1g10800 | C     | 344       | chlo                       | 8.39 | 36.52  |
| BdMKK10-4  | N/A   | Bd1:7809375-7810400   | Bradi1g10770 | C     | 341       | cyto                       | 9.07 | 35.92  |
| BdMKK10-5  | N/A   | Bd1:7835644-7836642   | Bradi1g10790 | C     | 332       | chlo                       | 9.29 | 34.73  |
| BdMAPKKK1  | 2402  | Bd5:26381665-26393219 | Bradi5g24870 | MEKK  | 1346      | nucl                       | 5.93 | 148.92 |
| BdMAPKKK2  | 1875  | Bd1:24311845-24322003 | Bradi1g28950 | Raf   | 1221      | nucl                       | 5.48 | 134.33 |
| BdMAPKKK3  | 1801  | Bd3:59221921-59227497 | Bradi3g60210 | Raf   | 1116      | nucl                       | 5.48 | 122.77 |
| BdMAPKKK4  | 1801  | Bd1:46211026-46216334 | Bradi1g47570 | Raf   | 1334      | nucl                       | 5.75 | 142.24 |
| BdMAPKKK5  | 1631  | Bd3:58646176-58654454 | Bradi3g59510 | Raf   | 1115      | nucl                       | 5.2  | 122.69 |
| BdMAPKKK6  | 1588  | Bd1:71704725-71713297 | Bradi1g74480 | Raf   | 1002      | chlo                       | 6.22 | 110.03 |
| BdMAPKKK7  | 1559  | Bd1:43232910-43245317 | Bradi1g45040 | Raf   | 1074      | chlo                       | 5.51 | 117.63 |
| BdMAPKKK8  | 1538  | Bd5:21229500-21236337 | Bradi5g18180 | MEKK  | 897       | nucl                       | 9.7  | 97.55  |
| BdMAPKKK9  | 1526  | Bd1:26089105-26094508 | Bradi1g30720 | Raf   | 1107      | nucl                       | 5.53 | 118.69 |
| BdMAPKKK10 | 1461  | Bd2:46786767-46795821 | Bradi2g46340 | Raf   | 803       | nucl                       | 5.9  | 89.17  |
| BdMAPKKK11 | 1434  | Bd3:52432077-52442048 | Bradi3g51380 | MEKK  | 892       | nucl                       | 9.62 | 96.71  |
| BdMAPKKK12 | 1407  | Bd3:27996347-28004441 | Bradi3g27120 | Raf   | 969       | nucl                       | 5.84 | 107.09 |
| BdMAPKKK13 | 1394  | Bd3:7283630-7297067   | Bradi3g09170 | Raf   | 793       | nucl                       | 6.24 | 88.33  |

|            |      |                       |              |      |     |         |      |       |
|------------|------|-----------------------|--------------|------|-----|---------|------|-------|
| BdMAPKKK14 | 1223 | Bd3:6429088-6437874   | Bradi3g08260 | Raf  | 854 | chlo    | 5.45 | 93.21 |
| BdMAPKKK15 | 1207 | Bd4:3687248-3696919   | Bradi4g04470 | Raf  | 759 | nucl    | 7.26 | 83.82 |
| BdMAPKKK16 | 1179 | Bd1:19257221-19260591 | Bradi1g23970 | ZIK  | 681 | nucl    | 5.51 | 76.87 |
| BdMAPKKK17 | 1166 | Bd4:43347286-43354339 | Bradi4g38400 | Raf  | 768 | chlo    | 6.46 | 83.65 |
| BdMAPKKK18 | 1122 | Bd3:46685117-46693548 | Bradi3g44710 | Raf  | 736 | chlo    | 7.61 | 80.21 |
| BdMAPKKK19 | 1110 | Bd1:5382770-5391852   | Bradi1g07650 | MEKK | 760 | pero    | 9.32 | 82.7  |
| BdMAPKKK20 | 1095 | Bd5:23982964-23988026 | Bradi5g21330 | Raf  | 763 | chlo    | 6.92 | 83.41 |
| BdMAPKKK21 | 1082 | Bd4:42043874-42051570 | Bradi4g36880 | Raf  | 593 | cyto    | 5.7  | 65.65 |
| BdMAPKKK22 | 1062 | Bd2:39411876-39418219 | Bradi2g39350 | ZIK  | 679 | nucl    | 5.09 | 76.16 |
| BdMAPKKK23 | 1040 | Bd4:34951319-34957350 | Bradi4g29500 | MEKK | 685 | nucl    | 6.06 | 74.62 |
| BdMAPKKK24 | 1026 | Bd1:59671548-59677424 | Bradi1g60340 | Raf  | 827 | nucl    | 8.66 | 91.38 |
| BdMAPKKK25 | 986  | Bd3:38320000-38325924 | Bradi3g36080 | MEKK | 681 | nucl    | 6.01 | 74.81 |
| BdMAPKKK26 | 961  | Bd1:57883897-57890503 | Bradi1g58810 | MEKK | 730 | chlo    | 9.3  | 79.38 |
| BdMAPKKK27 | 921  | Bd4:27230487-27234555 | Bradi4g22760 | MEKK | 664 | nucl    | 9.53 | 71.88 |
| BdMAPKKK28 | 920  | Bd3:52493768-52498074 | Bradi3g51460 | ZIK  | 616 | chlo    | 5.02 | 68.33 |
| BdMAPKKK29 | 919  | Bd1:7973279-7979810   | Bradi1g10970 | MEKK | 647 | chlo    | 5.19 | 69.75 |
| BdMAPKKK30 | 902  | Bd3:1128750-1132858   | Bradi3g01850 | Raf  | 601 | cyto    | 6.86 | 66.83 |
| BdMAPKKK31 | 890  | Bd2:4698348-4702360   | Bradi2g06260 | Raf  | 562 | nucl    | 9.36 | 63.39 |
| BdMAPKKK32 | 858  | Bd2:17241445-17245595 | Bradi2g19590 | Raf  | 596 | nucl    | 8.49 | 66.37 |
| BdMAPKKK33 | 821  | Bd3:49832148-49837407 | Bradi3g48360 | Raf  | 484 | chlo    | 8.3  | 53.93 |
| BdMAPKKK34 | 820  | Bd1:66064380-66071523 | Bradi1g67400 | MEKK | 757 | nucl    | 7.17 | 82.5  |
| BdMAPKKK35 | 820  | Bd2:49740523-49744032 | Bradi2g49700 | Raf  | 595 | nucl    | 8.94 | 66.32 |
| BdMAPKKK36 | 805  | Bd2:55622119-55624811 | Bradi2g57470 | Raf  | 494 | chlo    | 9.01 | 55.23 |
| BdMAPKKK37 | 789  | Bd3:3901063-3904136   | Bradi3g05520 | Raf  | 424 | cyto    | 7.21 | 46.99 |
| BdMAPKKK38 | 788  | Bd3:16597394-16605813 | Bradi3g18150 | Raf  | 418 | cyto    | 8.39 | 45.99 |
| BdMAPKKK39 | 779  | Bd1:23247985-23260462 | Bradi1g28110 | Raf  | 582 | chlo    | 5.93 | 64.65 |
| BdMAPKKK40 | 747  | Bd2:49806289-49809892 | Bradi2g49790 | Raf  | 451 | cysk    | 6.05 | 50.68 |
| BdMAPKKK41 | 745  | Bd1:10874042-10878698 | Bradi1g14000 | Raf  | 377 | cyto    | 8.51 | 41.42 |
| BdMAPKKK42 | 716  | Bd1:30837694-30839002 | Bradi1g35350 | Raf  | 405 | chlo    | 9.26 | 45.24 |
| BdMAPKKK43 | 697  | Bd1:2776045-2779519   | Bradi1g04080 | Raf  | 384 | cyto    | 8.07 | 42.45 |
| BdMAPKKK44 | 696  | Bd5:13989179-13995141 | Bradi5g10670 | MEKK | 697 | nucl    | 9.19 | 75.55 |
| BdMAPKKK45 | 685  | Bd3:49203215-49208033 | Bradi3g47600 | Raf  | 351 | cyto/ER | 6.9  | 39.41 |
| BdMAPKKK46 | 681  | Bd2:45294740-45299227 | Bradi2g44910 | Raf  | 388 | chlo    | 7.59 | 42.91 |
| BdMAPKKK47 | 679  | Bd2:13839453-13843007 | Bradi2g15560 | Raf  | 380 | nucl    | 7.96 | 42.11 |
| BdMAPKKK48 | 622  | Bd2:394744-398444     | Bradi2g00670 | Raf  | 371 | nucl    | 9.19 | 41.06 |
| BdMAPKKK49 | 621  | Bd1:16330864-16335462 | Bradi1g20390 | Raf  | 443 | cyto    | 7.08 | 49.1  |
| BdMAPKKK50 | 612  | Bd4:47836156-47839912 | Bradi4g44430 | ZIK  | 674 | nucl    | 5.94 | 73.23 |
| BdMAPKKK51 | 577  | Bd2:47911559-47913163 | Bradi2g47510 | MEKK | 485 | mito    | 5.15 | 52.34 |
| BdMAPKKK52 | 558  | Bd2:47895034-47896500 | Bradi2g47480 | MEKK | 489 | cyto    | 4.77 | 52.09 |
| BdMAPKKK53 | 541  | Bd2:47901623-47903160 | Bradi2g47490 | MEKK | 482 | chlo    | 4.58 | 51.38 |
| BdMAPKKK54 | 538  | Bd1:18706049-18708119 | Bradi1g23320 | ZIK  | 291 | cyto    | 5.95 | 32.71 |
| BdMAPKKK55 | 533  | Bd2:47907123-47908569 | Bradi2g47500 | MEKK | 461 | chlo    | 4.91 | 48.52 |
| BdMAPKKK56 | 520  | Bd4:45996792-45999204 | Bradi4g41940 | ZIK  | 367 | cyto    | 6.41 | 41.13 |
| BdMAPKKK57 | 471  | Bd3:9151086-9154557   | Bradi3g10890 | MEKK | 514 | chlo    | 5.41 | 53.75 |

|            |     |                       |              |      |      |      |      |        |
|------------|-----|-----------------------|--------------|------|------|------|------|--------|
| BdMAPKKK58 | 442 | Bd2:15856972-15858475 | Bradi2g17820 | MEKK | 476  | chlo | 4.52 | 50.3   |
| BdMAPKKK59 | 437 | Bd2:15863628-15865277 | Bradi2g17830 | MEKK | 550  | cyto | 4.44 | 57.92  |
| BdMAPKKK60 | 375 | Bd1:64476929-64478355 | Bradi1g65500 | MEKK | 308  | chlo | 10.4 | 32.29  |
| BdMAPKKK61 | N/A | Bd1:38555071-38556771 | Bradi1g41850 | MEKK | 567  | chlo | 6.28 | 60.54  |
| BdMAPKKK62 | N/A | Bd4:9550465-9557023   | Bradi4g09990 | Raf  | 742  | nucl | 7.59 | 82.36  |
| BdMAPKKK63 | N/A | Bd3:47663323-47669443 | Bradi3g45660 | Raf  | 731  | nucl | 6.85 | 81.78  |
| BdMAPKKK64 | N/A | Bd4:2137135-2141974   | Bradi4g02900 | Raf  | 1077 | nucl | 5.21 | 118.49 |
| BdMAPKKK65 | N/A | Bd1:463748-468001     | Bradi1g00580 | Raf  | 1110 | nucl | 5.1  | 121.6  |
| BdMAPKKK66 | N/A | Bd1:10919176-10923468 | Bradi1g14010 | Raf  | 377  | cyto | 8.15 | 41.44  |
| BdMAPKKK67 | N/A | Bd3:47768461-47774400 | Bradi3g45790 | MEKK | 689  | mito | 9.08 | 75.14  |
| BdMAPKKK68 | N/A | Bd2:15848962-15851260 | Bradi2g17800 | MEKK | 519  | chlo | 4.82 | 54.34  |
| BdMAPKKK69 | N/A | Bd2:15868375-15869700 | Bradi2g17840 | MEKK | 442  | chlo | 4.74 | 46.62  |
| BdMAPKKK70 | N/A | Bd3:57407383-57412051 | Bradi3g57740 | MEKK | 529  | chlo | 6.89 | 57.81  |
| BdMAPKKK71 | N/A | Bd4:30029484-30036316 | Bradi4g24830 | Raf  | 516  | cyto | 5.34 | 57.59  |
| BdMAPKKK72 | N/A | Bd4:30037627-30043618 | Bradi4g24840 | Raf  | 604  | nucl | 6.06 | 67.11  |
| BdMAPKKK73 | N/A | Bd3:11660021-11665140 | Bradi3g13050 | Raf  | 509  | nucl | 5.12 | 57.58  |
| BdMAPKKK74 | N/A | Bd3:11666314-11671851 | Bradi3g13060 | Raf  | 555  | nucl | 6.41 | 62.56  |
| BdMAPKKK75 | N/A | Bd4:45819310-45827277 | Bradi4g41870 | Raf  | 539  | cysk | 4.91 | 58.74  |

\* chlo: Chloroplast; cyto: Cytoplasm; cysk: Cytoskeleton; mito: Mitochondria; nucl: Nucleus; pero: Peroxisome;
