# Supplementary material for: Genome-wide exploration of the molecular evolution and regulatory network of mitogen-activated protein kinase cascades upon multiple stresses in Brachypodium distachyon
Source: PubMed Central journal article supplement (PMC4404688; doi:10.1186/s12864-015-1452-1), 2015-03-24
Supplement: 12864_2015_1452_MOESM3_ESM.pdf [file 12864_2015_1452_MOESM3_ESM.pdf]

**Additional file 3A List of MAPK genes in *O. sativa*, *A. thaliana* and *B. distachyon* chromosomes.**

| <i>A. thaliana</i> |            | <i>O. sativa</i> |                | <i>B. distachyon</i> |              |
|--------------------|------------|------------------|----------------|----------------------|--------------|
| gene name          | gene model | gene name        | gene model     | gene name            | gene model   |
| AtMPK1             | At1g10210  | OsMPK2           | LOC_Os08g06060 | BdMPK3               | Bradi1g65810 |
| AtMPK2             | At1g59580  | OsMPK3           | LOC_Os03g17700 | BdMPK4               | Bradi3g32000 |
| AtMPK3             | At3g45640  | OsMPK4           | LOC_Os10g38950 | BdMPK6               | Bradi1g49100 |
| AtMPK4             | At4g01370  | OsMPK6           | LOC_Os06g06090 | BdMPK7-1             | Bradi1g34030 |
| AtMPK5             | At4g11330  | OsMPK7           | LOC_Os06g48590 | BdMPK7-2             | Bradi4g24912 |
| AtMPK6             | At2g43790  | OsMPK14          | LOC_Os02g05480 | BdMPK11              | Bradi3g16560 |
| AtMPK7             | At2g18170  | OsMPK15          | LOC_Os05g05160 | BdMPK14              | Bradi3g03780 |
| AtMPK8             | At1g18150  | OsMPK16          | LOC_Os11g17080 | BdMPK16              | Bradi2g36470 |
| AtMPK9             | At3g18040  | OsMPK17-1        | LOC_Os06g49430 | BdMPK17              | Bradi1g34700 |
| AtMPK10            | At3g59790  | OsMPK17-2        | LOC_Os02g04230 | BdMPK20-1            | Bradi2g44350 |
| AtMPK11            | At1g01560  | OsMPK20-1        | LOC_Os01g43910 | BdMPK20-2            | Bradi2g15317 |
| AtMPK12            | At2g46070  | OsMPK20-2        | LOC_Os05g50560 | BdMPK20-3            | Bradi1g41780 |
| AtMPK13            | At1g07880  | OsMPK20-3        | LOC_Os06g26340 | BdMPK20-4            | Bradi2g45870 |
| AtMPK14            | At4g36450  | OsMPK20-4        | LOC_Os01g47530 | BdMPK20-5            | Bradi2g16337 |
| AtMPK15            | At1g73670  | OsMPK20-5        | LOC_Os05g49140 | BdMPK21-1            | Bradi2g15620 |
| AtMPK16            | At5g19010  | OsMPK21-1        | LOC_Os05g50120 | BdMPK21-2            | Bradi2g45010 |
| AtMPK17            | At2g01450  | OsMPK21-2        | LOC_Os01g45620 |                      |              |
| AtMPK18            | At1g53510  |                  |                |                      |              |
| AtMPK19            | At3g14720  |                  |                |                      |              |
| AtMPK20            | At2g42880  |                  |                |                      |              |

**Additional file 3B List of MAPKK genes in *O. sativa*, *A. thaliana* and *B. distachyon* chromosomes.**

| <i>A. thaliana</i> |            | <i>O. sativa</i> |                | <i>B. distachyon</i> |              |
|--------------------|------------|------------------|----------------|----------------------|--------------|
| gene name          | gene model | gene name        | gene model     | gene name            | gene model   |
| AtMKK1             | AT4G26070  | OsMKK1           | LOC_Os06g05520 | BdMKK1               | Bradi1g51000 |
| AtMKK2             | At4g29810  | OsMKK3           | LOC_Os06g27890 | BdMKK3-1             | Bradi4g39490 |
| AtMKK3             | At5g40440  | OsMKK4           | LOC_Os02g54600 | BdMKK3-2             | Bradi1g41860 |
| AtMKK4             | At1g51660  | OsMKK5           | LOC_Os06g09180 | BdMKK3-3             | Bradi3g11260 |
| AtMKK5             | At3g21220  | OsMKK6           | LOC_Os01g32660 | BdMKK4               | Bradi3g53650 |
| AtMKK6             | At5g56580  | OsMKK10-1        | LOC_Os02g46760 | BdMKK5               | Bradi1g46880 |
| AtMKK7             | At1g18350  | OsMKK10-2        | LOC_Os03g12390 | BdMKK6               | Bradi1g75150 |
| AtMKK8             | At3g06230  | OsMKK10-3        | LOC_Os03g50550 | BdMKK10-1            | Bradi1g11525 |
| AtMKK9             | At1g73500  |                  |                | BdMKK10-2            | Bradi1g69400 |
| AtMKK10            | At1g32320  |                  |                | BdMKK10-3            | Bradi1g10800 |
|                    |            |                  |                | BdMKK10-4            | Bradi1g10770 |
|                    |            |                  |                | BdMKK10-5            | Bradi1g10790 |

**Additional file 3C List of MAPKKK genes in *O. sativa*, *A. thaliana* and *B. distachyon* chromosomes.**

| <i>A. thaliana</i> |            | <i>O. sativa</i> |                | <i>B. distachyon</i> |              |
|--------------------|------------|------------------|----------------|----------------------|--------------|
| gene name          | gene model | gene name        | gene model     | gene name            | gene model   |
| AtCTR1             | At5g03730  | OsMAPKKK1        | LOC_Os03g06410 | BdMAPKKK1            | Bradi5g24870 |
| AtEDR1             | At1g08720  | OsMAPKKK2        | LOC_Os10g29540 | BdMAPKKK2            | Bradi1g28950 |
| AtMAPKKK1          | At1g09000  | OsMAPKKK3        | LOC_Os02g32610 | BdMAPKKK4            | Bradi1g47570 |
| AtMAPKKK2          | At1g54960  | OsMAPKKK4        | LOC_Os02g12810 | BdMAPKKK3            | Bradi3g60210 |
| AtMAPKKK3          | At1g53570  | OsMAPKKK5        | LOC_Os12g37570 | BdMAPKKK5            | Bradi3g59510 |
| AtMAPKKK4          | At1g63700  | OsMAPKKK6        | LOC_Os02g50970 | BdMAPKKK6            | Bradi1g74480 |
| AtMAPKKK5          | At5g66850  | OsMAPKKK7        | LOC_Os06g12590 | BdMAPKKK7            | Bradi1g45040 |
| AtMAPKKK6          | At3g07980  | OsMAPKKK8        | LOC_Os11g10100 | BdMAPKKK8            | Bradi5g18180 |
| AtMAPKKK7          | At3g13530  | OsMAPKKK9        | LOC_Os02g44642 | BdMAPKKK9            | Bradi1g30720 |
| AtMAPKKK8          | At4g08500  | OsMAPKKK10       | LOC_Os04g47240 | BdMAPKKK10           | Bradi2g46340 |
| AtMAPKKK9          | At4g08480  | OsMAPKKK11       | LOC_Os07g02780 | BdMAPKKK11           | Bradi3g51380 |
| AtMAPKKK10         | At4g08470  | OsMAPKKK12       | LOC_Os09g39320 | BdMAPKKK12           | Bradi3g27120 |
| AtMAPKKK11         | At4g12020  | OsMAPKKK13       | LOC_Os09g21510 | BdMAPKKK13           | Bradi3g09170 |
| AtMAPKKK12         | At3g06030  | OsMAPKKK14       | LOC_Os04g52140 | BdMAPKKK14           | Bradi3g08260 |
| AtMAPKKK13         | AT1G07150  | OsMAPKKK15       | LOC_Os08g32600 | BdMAPKKK15           | Bradi4g04470 |
| AtMAPKKK14         | AT2G30040  | OsMAPKKK16       | LOC_Os04g35700 | BdMAPKKK16           | Bradi1g23970 |
| AtMAPKKK15         | AT5G55090  | OsMAPKKK17       | LOC_Os09g37230 | BdMAPKKK17           | Bradi4g38400 |
| AtMAPKKK16         | AT4G26890  | OsMAPKKK18       | LOC_Os03g55560 | BdMAPKKK18           | Bradi3g44710 |
| AtMAPKKK17         | AT2G32510  | OsMAPKKK19       | LOC_Os02g35010 | BdMAPKKK19           | Bradi1g07650 |
| AtMAPKKK18         | AT1G05100  | OsMAPKKK20       | LOC_Os07g38530 | BdMAPKKK20           | Bradi5g21330 |
| AtMAPKKK19         | AT5G67080  | OsMAPKKK21       | LOC_Os07g25680 | BdMAPKKK21           | Bradi4g36880 |
| AtMAPKKK20         | AT3G50310  | OsMAPKKK22       | LOC_Os03g49640 | BdMAPKKK22           | Bradi2g39350 |
| AtMAPKKK21         | AT4G36950  | OsMAPKKK23       | LOC_Os12g40279 | BdMAPKKK23           | Bradi4g29500 |
| AtRaf3             | At5g11850  | OsMAPKKK24       | LOC_Os04g56530 | BdMAPKKK24           | Bradi1g60340 |
| AtRaf4             | At1g18160  | OsMAPKKK25       | LOC_Os02g38080 | BdMAPKKK25           | Bradi3g36080 |
| AtRaf5             | At1g73660  | OsMAPKKK26       | LOC_Os07g29330 | BdMAPKKK26           | Bradi1g58810 |
| AtRaf6             | At4g24480  | OsMAPKKK27       | LOC_Os03g43760 | BdMAPKKK27           | Bradi4g22760 |
| AtRaf7             | At3g06620  | OsMAPKKK28       | LOC_Os03g15570 | BdMAPKKK28           | Bradi3g51460 |
| AtRaf8             | At3g06630  | OsMAPKKK29       | LOC_Os02g45130 | BdMAPKKK29           | Bradi1g10970 |
| AtRaf9             | At3g06640  | OsMAPKKK30       | LOC_Os02g02780 | BdMAPKKK30           | Bradi3g01850 |
| AtRaf10            | At5g49470  | OsMAPKKK31       | LOC_Os01g45380 | BdMAPKKK31           | Bradi2g06260 |
| AtRaf11            | At1g67890  | OsMAPKKK32       | LOC_Os08g12750 | BdMAPKKK32           | Bradi2g19590 |
| AtRaf12            | At4g23050  | OsMAPKKK33       | LOC_Os02g07790 | BdMAPKKK33           | Bradi3g48360 |
| AtRaf13            | At2g31010  | OsMAPKKK34       | LOC_Os05g50190 | BdMAPKKK34           | Bradi1g67400 |
| AtRaf14            | At2g42630  | OsMAPKKK35       | LOC_Os02g54510 | BdMAPKKK35           | Bradi2g49700 |
| AtRaf15            | At3g58640  | OsMAPKKK36       | LOC_Os05g01780 | BdMAPKKK36           | Bradi2g57470 |
| AtRaf16            | At1g04700  | OsMAPKKK37       | LOC_Os04g51950 | BdMAPKKK37           | Bradi3g05520 |
| AtRaf17            | At1g14000  | OsMAPKKK38       | LOC_Os06g45300 | BdMAPKKK38           | Bradi3g18150 |
| AtRaf18            | At1g16270  | OsMAPKKK39       | LOC_Os06g08280 | BdMAPKKK39           | Bradi1g28110 |
| AtRaf19            | At1g62400  | OsMAPKKK40       | LOC_Os01g48330 | BdMAPKKK40           | Bradi2g49790 |
| AtRaf20            | At1g79570  | OsMAPKKK41       | LOC_Os06g43840 | BdMAPKKK41           | Bradi1g14000 |
| AtRaf21            | At2g17700  | OsMAPKKK42       | LOC_Os03g60150 | BdMAPKKK42           | Bradi1g35350 |
| AtRaf22            | At2g24360  | OsMAPKKK43       | LOC_Os06g50920 | BdMAPKKK43           | Bradi1g04080 |

|         |           |            |                |            |              |
|---------|-----------|------------|----------------|------------|--------------|
| AtRaf23 | At2g31800 | OsMAPKKK44 | LOC_Os02g14530 | BdMAPKKK44 | Bradi5g10670 |
| AtRaf24 | At2g35050 | OsMAPKKK45 | LOC_Os06g43030 | BdMAPKKK45 | Bradi3g47600 |
| AtRaf25 | At2g43850 | OsMAPKKK46 | LOC_Os11g06140 | BdMAPKKK46 | Bradi2g44910 |
| AtRaf26 | At4g14780 | OsMAPKKK47 | LOC_Os07g08750 | BdMAPKKK47 | Bradi2g15560 |
| AtRaf27 | At4g18950 | OsMAPKKK48 | LOC_Os01g01740 | BdMAPKKK48 | Bradi2g00670 |
| AtRaf28 | At4g31170 | OsMAPKKK49 | LOC_Os05g44290 | BdMAPKKK49 | Bradi1g20390 |
| AtRaf29 | At4g35780 | OsMAPKKK50 | LOC_Os12g02250 | BdMAPKKK50 | Bradi4g44430 |
| AtRaf30 | At4g38470 | OsMAPKKK51 | LOC_Os01g54350 | BdMAPKKK51 | Bradi2g47510 |
| AtRaf31 | At5g01850 | OsMAPKKK52 | LOC_Os12g06490 | BdMAPKKK52 | Bradi2g47480 |
| AtRaf32 | At5g40540 | OsMAPKKK53 | LOC_Os11g02305 | BdMAPKKK53 | Bradi2g47490 |
| AtRaf33 | At5g50000 | OsMAPKKK54 | LOC_Os03g28300 | BdMAPKKK54 | Bradi1g23320 |
| AtRaf34 | At5g50180 | OsMAPKKK55 | LOC_Os01g50400 | BdMAPKKK55 | Bradi2g47500 |
| AtRaf35 | At5g57610 | OsMAPKKK56 | LOC_Os05g01780 | BdMAPKKK56 | Bradi4g41940 |
| AtRaf36 | At5g58950 | OsMAPKKK57 | LOC_Os05g46750 | BdMAPKKK57 | Bradi3g10890 |
| AtRaf37 | At5g66710 | OsMAPKKK58 | LOC_Os03g39150 | BdMAPKKK58 | Bradi2g17820 |
| AtRaf38 | At3g01490 | OsMAPKKK59 | LOC_Os12g41260 | BdMAPKKK59 | Bradi2g17830 |
| AtRaf39 | At3g22750 | OsMAPKKK60 | LOC_Os03g53410 | BdMAPKKK60 | Bradi1g65500 |
| AtRaf40 | At3g24720 | OsMAPKKK61 | LOC_Os01g10450 | BdMAPKKK61 | Bradi1g41850 |
| AtRaf41 | At3g27560 | OsMAPKKK62 | LOC_Os01g50420 | BdMAPKKK62 | Bradi4g09990 |
| AtRaf42 | At3g46920 | OsMAPKKK63 | LOC_Os01g50370 | BdMAPKKK63 | Bradi3g45660 |
| AtRaf43 | At3g46930 | OsMAPKKK64 | LOC_Os07g39520 | BdMAPKKK64 | Bradi4g02900 |
| AtRaf44 | At3g50720 | OsMAPKKK65 | LOC_Os07g43900 | BdMAPKKK65 | Bradi1g00580 |
| AtRaf45 | At3g50730 | OsMAPKKK66 | LOC_Os10g04010 | BdMAPKKK66 | Bradi1g14010 |
| AtRaf46 | At3g59830 | OsMAPKKK67 | LOC_Os10g04000 | BdMAPKKK67 | Bradi3g45790 |
| AtRaf47 | At3g58760 | OsMAPKKK68 | LOC_Os12g30570 | BdMAPKKK68 | Bradi2g17800 |
| AtRaf48 | At3g63260 | OsMAPKKK69 | LOC_Os05g46760 | BdMAPKKK69 | Bradi2g17840 |
| AtZIK1  | AT3G51630 | OsMAPKKK70 | LOC_Os01g50410 | BdMAPKKK70 | Bradi3g57740 |
| AtZIK2  | AT5G58350 | OsMAPKKK71 | LOC_Os02g21700 | BdMAPKKK71 | Bradi4g24830 |
| AtZIK3  | At3g22420 | OsMAPKKK72 | LOC_Os01g54480 | BdMAPKKK72 | Bradi4g24840 |
| AtZIK4  | AT3G04910 | OsMAPKKK73 | LOC_Os03g18170 | BdMAPKKK73 | Bradi3g13050 |
| AtZIK5  | AT3G18750 | OsMAPKKK74 | LOC_Os01g66860 | BdMAPKKK74 | Bradi3g13060 |
| AtZIK6  | AT5G41990 | OsMAPKKK75 | LOC_Os02g39560 | BdMAPKKK75 | Bradi4g41870 |
| AtZIK7  | AT1G49160 |            |                |            |              |
| AtZIK8  | AT5G55560 |            |                |            |              |
| AtZIK9  | AT5G28080 |            |                |            |              |
| AtZIK10 | AT1G64630 |            |                |            |              |
| AtZIK11 | AT3G48260 |            |                |            |              |
