# Supplementary material for: Genome-wide exploration of the molecular evolution and regulatory network of mitogen-activated protein kinase cascades upon multiple stresses in Brachypodium distachyon
Source: PubMed Central journal article supplement (PMC4404688; doi:10.1186/s12864-015-1452-1), 2015-03-24
Supplement: 12864_2015_1452_MOESM4_ESM.pdf [file 12864_2015_1452_MOESM4_ESM.pdf]

**Additional file 4 The amino acid sequences of MAPK cascade members in *B. distachyon*,  
*Arabidopsis* and *O. sativa*.**

| Gene name | Amino acid sequences                                                                                                                                                                                                                                                                                                                                                                                                                                                                                                                                                    |
|-----------|-------------------------------------------------------------------------------------------------------------------------------------------------------------------------------------------------------------------------------------------------------------------------------------------------------------------------------------------------------------------------------------------------------------------------------------------------------------------------------------------------------------------------------------------------------------------------|
| AtMPK1    | MATLVDPNGIRNEGKHYFSMWQTLFEIDTKYMPIKPIGRGAYGVVCSVNSDNEKVAIKKIHNVYENRIDALRTLRELKLLRHLRHE<br>NVIALKDVMMPIHKMSFKDVYLVYELMDTDLHQIHKSSQRLSNHDCQYFLFQLLRGLKYIHSANILHRDLKPGNLLVNANCDLKICDF<br>GLARASNTKGQFMTEYVWTRWYRAPELLCCDNYGTSIDVWSVGCIFAELLGRKPIFGTECLNQLKLIIVNIIGSQREEDLEFIVNPKA<br>KRYIRSLPSPGMSLSRLYPCAHLAIDLQKMLVDFPSKRISASEALQHPYMAPLYDPNANPPAQVPIDLDVDEDLREEMIREMIWNE<br>MLHYHPQASTLNTL                                                                                                                                                                              |
| AtMPK2    | MATPVDPPNGIRNQGKHYFSMWQTLFEIDTKYMPIKPIGRGAYGVVCSVNRNERSNERVAIKKIHNVFNENRIDALRTLRELKLLRHLRHE<br>NVVALKDVMMANHKRSFKDVYLVYELMDTDLHQIHKSSQVLSNDHCQYFLFQLLRGLKYIHSANILHRDLKPGNLLVNANCDLKICD<br>FGLARTSNTKGQFMTEYVWTRWYRAPELLCCDNYGTSIDVWSVGCIFAELLGRKPVFPGTECLNQIKLIINILGSQREEDLEFIDNPKA<br>KRYIESLPYSPGISFSRLYPGANVLAIDLQKILVLDPSKRISVTEALQHPYMAPLYDPSANPPAQVPIDLDVDEDEDLGAEMIRELMWK<br>EMIHYPHPEAATINNNEVSEF                                                                                                                                                               |
| AtMPK3    | MNTGGGQYTDPAVDTHGGQFISYDIFGSLFEITSKYRPPPIPIGRGAYGIVCSVLDTETNELVAMKKIANAFDNHMDAKRTLREIKLLRH<br>LDHENIIAIRDVVPPLRRQFSDVYISTELMDTDLHQIIRSNQSLSEEHQYFLYQLLRGLKYIHSANIIHRDLKPSNLLLNANCDLKICDF<br>GLARPTSENDMTEYVWTRWYRAPELLNNSDYTAIDVWSVGCIFMELMNRKPLFPKGDHVVHMRLTELLGTPTESDLGFTHNED<br>AKRYIRQLPNFRQPLAKLFSHVNPMAIDLVDRLMFTDPNRRITVEALNHQYLAKLHDPNDEPICQKPFSEFEQQPLDEEQIKEMIQ<br>EAIALNPTYG                                                                                                                                                                                 |
| AtMPK4    | MSAESCFGSSGDQSSSKGVATHGGSYVQYVYGNLFEVSRKYVPLRPIGRGAYGIVCAATNSETGEEVAIKKIGNAFDNIIDAKRTLRE<br>IKLLKHMHDHENVIAVKDIKPPQRENFDVYVYELMDTDLHQIIRSNQPLTDDHCRFFLYQLLRGLKYVHSANVLRDLKPSNLLNA<br>NCDLKLGDGFLARTKSETDFMTEYVWTRWYRAPELLNCSYTAADIWSVGCILGETMTREPLFPKDYVHQLRLITELIGSPDDSSL<br>GFLRSDNARRYVRQLPQYPRQNFARFPNMSAGAVDLEKMLVFEPSRRITVDEALCHPYLAPLHDINEEPCVVRPFNFDFEQPTLTEE<br>NIKELIYRETVKFNPDQSV                                                                                                                                                                            |
| AtMPK5    | MAKEIESATDLGDTNIKGVLVHGGRYFQYVYVGNLFEVSNKYVPIRPIGRGAYGFVCPAVDSETHEEIAIKKIGKAFDNKVDKRTLRE<br>EIKLLRHLHEHENVVIKDIIRPPKEDFVDVYVYELMDTDLHQIIRSNQSLNDDHCQYFLYQILRGLKYIHSANVLRDLKPSNLLNS<br>NCDLKITDFGLARTTSETYEMTEYVWTRWYRAPELLNNSSEYTAIDVWSVGCIFAEMTREPLFPKDYVHQLKLITELIGSPDGASLE<br>FLRSANGGKYVKELPKFPRQNFARFPMNSTAIDLLEKMLVDFPVKRITVEALCYPYLSALHDLNDEPVCNSHFSFHEDPSSSTEEI<br>KELVWLESVKFNPLPSI                                                                                                                                                                            |
| AtMPK6    | MDGGSGQPAADTEMTAPGGFPAAAPSPQMPGIENIPATLSHGGRFIQYINIFGNIFEVTAKYKPPIMPIGKAYGIVCSAMNSETNESVAI<br>KKIANAFDNKIDAKRTLREIKLLRHMDHENIVAIRDIIPPLRNAFNDVYIAYELMDTDLHQIIRSNQALSEEHCQYFLYQILRGLKYIHS<br>ANVLRDLKPSNLLLNANCDLKICDFGLARVTSSEDFMTEYVWTRWYRAPELLNNSDYTAADVWSVGCIFMELMDRKLFPGRDH<br>VHQLRLLMELIGTPSEEELEFLNENAKRYIRQLPPYPRQSITDKFPTVHPLAIDLIEKMLTFDPRRRITVLDALAHPYLNSLHDISDEPECT<br>IPFNDFENHALSEEQMKELIYREALAFNPEYQQ                                                                                                                                                    |
| AtMPK7    | MAMLVPPNGIKQQGKHYYSMWQTLFEIDTKYVPIKPIGRGAYGVVCSINRETNERVAIKKIHNVFNENRVDALRTLRELKLLRHRVHRE<br>NVIALKDVMLPANRSTFKDVYLVYELMDTDLHQIHKSSQSLSDHCKYFLFQLLRGLKYLHSANILHRDLKPGNLLVNANCDLKICDF<br>GLARTSQGNEQFMTEYVWTRWYRAPELLCCDNYGTSIDVWSVGCIFAELGRKPIFGTECLNQLKLIIVNIGSQQESDIRFIDNPKAR<br>RFIKSLPYSRGTLSNLYPQANPLAIDLQRMLVFEPTKRISVTDALLHPYMAGLFEPGTNPPAHVPISLDIDENMEEPVIREMMWNEML<br>YYHPEAEILNA                                                                                                                                                                              |
| AtMPK8    | MGGGGLVDGVRWLFQRPSSSSSSSSSNNNNNHEQIFNSSFSSSSNPNSANSANGELIIEEDLDFSGTLINVPKRNHLPMDPHKKG<br>ETEFFTEYGEANRYQIEVVGKGSYGVVASAVDSHTGERVAIKKINDVFEHVSDATRILREIKLLRLLRHPDVVEIKHIMLPPSRREFPHI<br>YVVFELMESDLHQVIKANDDLTPEHYQFFLYQLLRGLKYVHAANVFHRDLKPKNILANADCKLKICDFGLARVSFNDAPTAIFWTDYV<br>ATRWYRAPELCSFFSKYTPAIDIWSVGCIFAEMLLGKPLFPKGNVHQLDLMDFLGTPTPPESISRIRNEKARRYLSMRKQPVVFSH<br>KFPKAEPLARLLERLLAFDPKDRASAEDALADPYFSGLSNSEREPTQPISKLEFDFERKLVKDDVRELYREILEYHPQMLEEYLRG<br>GDQLSFMYPGSDRFRKQFAHLEENQKPVAAAGGRSTALHRHSHASLPRERVPAPNGETAEESSDVERRAAAFASTLESEEQTMEEV<br>TVLVTS |
| AtMPK9    | MDPHKKVALETEFFTEYGEASRYQIEVIGKGSYGVVASAIDTHSCEKVAIKKSNVFEHVSDATRILREIKLLRLLRHPDIVEIKHVML<br>PPSRDFRDIYVVFELMESDLHQVIKANDDLTPEHYQFFLYQLLRGLKFIHTANVFHRDLKPKNILANSDCCKLKICDFGLARVSFNDAPS<br>AIFWTDYVANRWYRAPELCSFFSKYTPAIDIWSIGCIFAEMLTGKPLFPKGNVHQLDIMTDLLGTPPEAIARIRNEKARRYLGNMRR<br>KPPVPTHKFPVHDPALRLLHRLAFDPKDRPSAEALADPYFYGLANVDREPSTQPIKLEFERRKLTKEDVRELYREILEYHPQ<br>MLQEYLRGGEQTSFMYPSGVDRFKQFAHLEENYGGKGEKSPQRQHASLPRERVPAPKENGSHNDIENRSIASLVTTLESPTSQH<br>EGSDYRNGTSQQGYSARSLLKSASISASKCIGMKPRNKSEYGESNNDTVDALSQKVAALHT                                        |
| AtMPK10   | MEPTNDAETLETQGEVTTAIWSSQILKTTIDIPGTLSDHGRYIYQYVYVGNLFEVSRKYVPLRPIGRGACGIVCSAVDSETNEKVAIKKITQ<br>VFDNTIEAKRTLREIKLLRHFDHENIVAIRDVILPPQRDSFEDVYVYVGNLMEFDLYRTLKSDQELTKDHGMYFMYQILRGLKYIHSANV<br>LRDLKPSNLLSTQCDLKICDFGLARATPESNLMTEYVWTRWYRAPELLGSSDYTAADVWSVGCIFMEIMNREPLFPKQDVNQRLR<br>LLELIGTPSEELGSLSEYAKRYIRQLPTLPRQSFTKFPNVPPLAIDLVEKMLTFDPKQRISVKEALAHPYLSSFHDITDEPECSEPNFD<br>LDEHPFSEEQRELIYCEALAFNPETSND                                                                                                                                                        |
| AtMPK11   | MSIEKPFPGDSDNRGVSINGGRYVQYVYVGNLFEVSKKYVPLRPIGRGASGIVCAAWNSETGEEVAIKKIGNAFGNIIDAKRTLREIKL                                                                                                                                                                                                                                                                                                                                                                                                                                                                               |

LKHMHDHNVIAIIDIRPPQPDNFNDVHIVYELMDTDLHHIIRSNQPLTDDHSRFFLYQLLRGLKYVHSANVLRDLKPSNLLLNANCDL  
KIGDFGLARTKSETDFMTEYVTRWYRAPELLNCSEYTAADIWSVGCILGEIMTREPFPGRDYVQQLRLITELIGSPDDSSLGFLRSD  
NARRYVRQLPQYPRQNFARFPNMSVNAVDDLQKMLVFDPNRRITVDEALCHPYLAPLHEYNEEPVCRPFHFDFEQPSLTEENIKELI  
YRESVKFNP

AtMPK12 MDLVSSRDTLGDPSTSTKALLGFSRSRSDHCIIIMSGESSGSTEHCIKVVPTHGGRYVQYNVYQGLFEVSRKYVPPIRPIGRGACGIVC  
AAVNSVTGEKVAIKKIGNAFDNIIDAKRTLREIKLLRHMDHENVITIKDIVRPPQRDIFNDVYIVYELMDTDLQRILRSNQTLTSDQCRFL  
VYQLLRGLKYVHSANILHRDLRPSNVLLNSKNELKIGDFGLARTSDTDFMTEYVTRWYRAPELLNCSEYTAADIWSVGCILGEIM  
TGQPLFPKDYVHQLRLITELVGSNDSSLGFLRSDNARRYVRQLPQYPRQNFARFPKMPPTAIDLLERMLVFDPNRRISVDEALGHA  
YLSPHHDVAKEPVCSTPFSDFEHPSCTEEHKELIYKESVKFNPDH

AtMPK13 MEKREDGGILTYDGRYVMYVNLGNIFELSSKYIPPIEPIGRGAYGIVCCATNSETNEEVAIKKIANAFDNRVDAKRTLREIKLLSHMDHD  
NVIKIKDIIEPEKERFEDVYVYELMDTDLHQIRSTQTLTDDHCQYFLYQLLRGLKYIHSANVLRDLKPSNVLNTNCDLKICDFGLA  
RTSNETEIMTEYVTRWYRAPELLNSSEYTGAIWVGCIFMEILRRETLFPKDYVQQLKLITELGSPDDSDLDLFRSDNARKYV  
KQLPHVQKQSFREKFPNISPALDLAEKMLVFDPSKRITVDEALKQPYLASLHEINEEPTCPTPFSDFEETALDEQDIKELVWRESLHF  
KNM

AtMPK14 MAMLVDPNGIRQEGKHYYTMWQTLFEIDTKYVPIKPIGRGAYGVVCSINSETNERVAIKKIHNVFENRIDALRTLRELKLLRHVRHE  
NVISLKDVMPLTHRYFRDVLVYELMDSLDNIQSSQSLSDHCKYFLQLLRGLKYLHSANILHRDLKPGNLLVNANCDLKICDFG  
LARTYEQFMTEYVTRWYRAPELLCCDNYGTSIDVWSVGCIFAELGRKPIFPGTECLNQLKLIINVVGSQDQDWLQFIDNQKARRFI  
KSLPFSKGTFFSHIYPHANPLAIDLLQRMLVFDPTKRISVSDALLHPYMEGLEPECNPSENVVSSLEIDENMEGDMIREMMWEEMLH  
YLPRA

AtMPK15 MGGGGLVDGVRWVFFQRRPSSSSSSNNHDQIQNPPTVSNPNDEEDLKKLTDPSKLRQIKVQQRNHPMEKKGIPNAEFFTEYGEAN  
RYQIQEVVKGSGYGVVGSADTHTGERVAIKKINDVFDHISDATRILREIKLLRLLHPDVVEIKHIMLPPSRREFRDYVVFELMESDLH  
QVIKANDDLTPEHHQFFLYQLLRGLKYVHAANVFHRDLKPKNILANADCKLKICDFGLARVFNDAPTAIFWTDYVATRWYRAPELCG  
SFFSKYTPAIDIWSVGCIFAEMLLGKPLFPKGNVHQLDMDTDLGTPPEAISKIRNDKARRYLGNMRRKKQVPFSSKFKPKADPSALRL  
LERLIAFDPKDRPSAEEALADPYFNGLSKVPREPSTQPIKLEFEFERKLTDDIRELIYREILEYHPQMLEEYLRGGNQLSFMYPGVD  
RFRQFAHLEENQGGGRSNALQRQHASLPRRVPASKNETVEERSNDIERRTTAAVASTLDSPKASQAEGTENGSGGYSARNLMK  
SSSISGSKCIGVQSKTNIEDSIVEEQDETVAVKVASLHNS

AtMPK16 MQPDHRKSSVEVDFTEYGEGRYRIEVEIGKSGYGVVCSAYDHTGKVAIKKINDIFEHVSDATRILREIKLLRLLRHPDIVEIKHIL  
LPPSRREFRDIYVVFELMESDLHQVIKANDDLTPEHYQFFLYQLLRGLKYIHTANVFHRDLKPKNILANADCKLKICDFGLARVAFNDT  
PTAIFWTDYVATRWYRAPELCGSFFSKYTPAIDIWSIGCIFAELTGKPLFPKGNVHQLDMLDMLGTPSAEAIGRVRNEKARRYLSM  
RKKKPIPFSHKPHDPLALRLLEKMLSEPKDRPTAEALADVYFKGLAKVEREPSAQPVTKLEFEFERRITKEDVRELIYRESLEYH  
PKMLKEYLDGSEPTNFMYPYSAVEHFKKQFAYLEEYKNGTSHNPPERQHASLPRACVLYSDNNHPVAQSSAEVTDGLSKCSIRDER  
PRGADRNAQMPMSRIPINVPQTIQGAAVARPGKVVGSVLRVNNCGAATGVEALEQQRRMVRNPAASQYPKRTQPKSNRGEDEC  
ATAAEGPSRLKPNQYIPQKVSAAQDTAMSRWY

AtMPK17 MLEKEFFTEYGEASQYQIEVVGKSGYGVVSAECPHTGGKVAIKKMTNVFEHVSDAIRILREIKLLRLLRHPDIVEIKHIMLPPCRKEF  
KDIYVVFELMESDLHHVVKVNDLTPQHQQFFLYQLLRGLKFMHSAHVHRDLKPKNILANADCKIKICDLGLARVSTFSDPSAVFWT  
DYVATRWYRAPELCGSFYSNYTPAIDMWSVGCIFAEMLTGKPLFPKGNVHQLLELTDLLGTPSPITLSRIRNEKARKYLGNMRRKDP  
VPFTHKFPNIDPVALKLLQRLIAFDPKDRPSAEEALADPYFQGLANVDYEPSRQPIKLEFEFERRKLTDRDDVRELMYREESLKTFFVFL  
FLDMKQILEYHPQMLQELYQGEENINSHFLYPRESVSYFGESLISGVDQFKQEFARLEEHNDEEHNPPHQRYKYSLPRVCSSE  
DEGSDSVHAQSSASVFTPPQTPNTATGLSSQKASQVDKAATPVKRSACLMRSDSICASRCVGVSSAS

AtMPK18 MEFFTEYGDANRYRILEVIGKSGYGVVCAIDTHTGKVAIKKINDVFEHISDALRILREVKLLRLLRHPDIVEIKSIMLPPSKREFKDIY  
VVFELMESDLHQVIKANDDLTREHHQFFLYQMLRALKFMHTANVYHRDLKPKNILANANCKLKVCDFGLARVAFNDTPTTVFWDY  
VATRWYRAPELCGSFFSKYTPAIDVWSIGCIFAELTGKPLFPKGSVHQLLELTDLLGTPKSETISGVRNDKARKYLTEMRKNPVTFS  
QKFSKADPLALRLLQRLAFAFDPKDRPTAEALADPYFKGLSKIEREPSSQKSKMEFEFERRRLTKDDIRELIYREILEYHPQLLDYMSG  
SEGSNFVYPSAIGHLRQFTYLEENSSRNGPVIPLERKHASLPRSTVHSTVHSTSQPNLGATDSRRVSEFSPKNGASSAGHPSTSAIPTK  
SIGPPRVPSPGRPRVVESSVSYENGRNLKEAYFRS AVSSPHCYFRPNTMTNPNENRNEASSFPKQPNVHQFSPTPEPAATTNQADVE  
TMNHPNPFYQPLPKTDQLNNTHTMAIDAKLLQAQSQFGPAGAAVAVAAHRNIGTISYSAAS

AtMPK19 MQKTQEKKNMKEEFFTEYGDANRYRILEVIGKSGYGVVCAIDTHTGKVAIKKINDVFEHVSDALRILREVKLLRLLRHPDIVEIKS  
IMLPPSKREFKDIYVVFELMESDLHQVIKANDDLTREHHQFFLYQMLRALKYMHNTANVYHRDLKPKNILANANCKLKVCDFGLARV  
FNDTPTTVFWDYVATRWYRAPELCGSFCYSKYTPAIDIWSIGCIFAELTGKPLFPKGSVHQLDLITDLGTPKSETIAGVRNEKARKY  
LNEMRKNLVPFSQKFPNADPLALRLLQRLAFAFDPKDRPTAEALADPYFKCLAKVEREPSQPIKMEFEFERRRLTKDDIRELIYREI  
LEYHPQLLDYMNSEGSSFLYPSAIGHLRKQFAYLEENSGKSGPVIPIPRKASLPRSAVHSSAVNSNAQPSLNASDSRRVSIEPSRNGV  
VPSTAYSSTKPLGPPRVPSPGKPRVVESSVYENDRNKLESSYDARTSYRSTVLPQTVSPNCYFLPNTMNQEKRSRGTAAASQPKPQ  
FVPTQCNSAKPAELNPNYVQSQHKVGDIAKLLHAQSQYGPAGAAVAVAAHRNIGAVGYGMS

AtMPK20 MQQDNRRKNNLEMEFFSDYGDANRFKVEVIGKSGYGVVCSAIDTLTGEKVAIKKIHDIFEHISDAARILREIKLLRLLRHPDIVEIKHI  
MLPPSRREFKDIYVVFELMESDLHQVIKANDDLTREHYQFFLYQLLRALKYIHTANVYHRDLKPKNILANANCKLKICDFGLARVAFN  
DTPTTIFWTDYVATRWYRAPELCGSFYSKYTPAIDIWSIGCIFAELMGKPLFPKGNVHQLDMLDMLGTPSLDITSRVRNEKARRYLT  
SMRKKPIPFPAQKFPNADPLSLKLLERLLAFAFDPKDRPTAEALADPYFKGLAKVEREPSQPIKMEFEFERRKVTKEDIRELISREILEY  
HPQLLDHMHNGADKASFLYPSAVDQFRRQFAHLEENSGKSGTPVAPLERKHASLPRSTVIHSTAVARGGPKLMNNTNLNTPETQNIFF  
NHATQAQRNL SAAKPTFMGPVAPFDNGRISRDAYDPRSFIRSTNLPSQSAATVAMGKQERRTTMEPEKQARQISQYNYRYPDV  
AINIDNPNFIMARTGMNKAENISDRIIIDTNLLQATAGIVAAAAAAPPAGSARHKVAVRYGMSKMY

BdMPK3 MDGAPVAEFRPTMTHGGRFLLYNIFGNQFEITAKYQPPIMPPIGRGAYGIVCSVMNFETREMVAIKKIANAFDNNMDAKRTLREIKLLRH LDHENIVGLRDVIPPAPQSFNDVYIATELMDTDLHIIIRSNQELSEEHCQYFLYQLLRGLKYIHSANVIHRDLKPSNLLNANCDLKICD FGLARPSSESDMMTEYV VTRWYRAPELLNSTDYSAADVWSVGCIFMELINRAPLFPGRDHMHQMLRITEVIGTPTDDDLGFIRNED ARRYMRHLPQFPRRPFPAQFPRVQPAALDLIERMLAFNPLQRITVEEALHEPHYLERLHDAIEPICTDPFSDFEQHPLTEDQMQLIFNE ALELNPFRY

BdMPK4 MDTSGGGGAGGAAQIQGMATHGGRYVLYNVYGNLFEVASKYAPPPIRPIGRGAYGIVCAAVSSDTGEEVAIKKIGNAFDNHIDAKRTLREIKLLRHMDHENIIAIKDIIRPPRRDDFKDVYIVTELMDTDLHQIIRSNQPLTDDHCQYFLYQLLRGLKYVHSANVLRDLKPSNLFNA NCDLKIADFLARTTSETDLMTEYV VTRWYRAPELLNCSQYTAADVWSVGCILGEIITRQPLFPGRDYIQLKLITELIGSPDSSLGF LRSNARRYMKQLPQYPRQDFRLFRNMSDGAVDLLERMLVDFPSRRITVDEALHHPYLASLHDINEEPTCPAPFSDFEQPSFTEEHM KELIWRETLAFNPDPY

BdMPK6 MDGGAQPDAEMADAGA AVPGAGAGAAGTMENIQATLSHGGRFIQYNIFFGNVFEVTVKYKPPILPIGKAYGIVCSALNSETGEQVAI KKIANDFNKIDAKRTLREIKLLRHMDHENIVAIRDIIPPAQRNSFNDVYIAYELMDTDLHQIIRSNQALSEEHCQYFLYQILRGLKYIHS ANVLRDLKPSNLLNANCDLKICDFGLARTTSETDFMTEYV VTRWYRAPELLNSSEYTAADVWSVGCIFMELMDRKLFPGRDH VHQLRLMELIGTPNEADLDFV NENARRYIRQLPRHARQSFSEKFPVHPSAIDLVEKMLTFDPRQRITVEGALAHPYLASHDISDEPV CTMPFSDFEQHALSEEQMKDLIHQEALAFNPDYQ

BdMPK7-1 MPSRPFLLSPGCFIRLLSGSASSDLLLLPRRGSAPRARVLLKMAMMVDPPNGTGNHGKHYTMWQTMFEIDTKYVPIKPIGRGAYG IVCSSTNQENNEKVAIKKINNVFDNRVDALRTLRELKLLRHLRHENVIALKDIMPVHRRSFKDVYLVSELMMDTDLHQIKSSQPLSND HCQYFLYQLLRGLKYLHSAIGLHRDLKPGNLLVANCNDLKICDFGLARTNNTKGFQFMTEYV VTRWYRAPELLCCDNYGTSIDVWSV GCIFAEALLGRKPIFPGTECLNQLKLVNVLGTMSENDLEFIDNP KARKYIKSLPYTPGTPLTSMYPQAHPLAIDLQKMLVDFPSKRISVT EALEHPYMSPLYDPSANPPAQVPIDLDIDENLGVEMIREMLWQEMQLYHPEAARMVNM

BdMPK7-2 MAMMVDPNGTGNHGKHYTMWQTMFEIDTKYVPIKPIGRGAYGIVCSSTNQENNEKVAIKKINNVFDNRVDALRTLRELKLLRHL RHENVIALKDIMPVHRRSFKDVYLVFELMDTDLHQIKSSQPLSNDHCQYFLYQLLRGLKYLHSAIGLHRDLKPGNLLVANCNDLKIC DFGLARTNNTKGFQFMTEYV VTRWYRAPELLCCDNYGTSIDVWSVGCIFAEALLGRKPIFPRTQCLDQLKLVNVLGTMSENDLEFIDNP KARKYIKSLPYTPGTPLTSMYPQAHPLAIDLQKMLVDFPSKRISVTEALEHPYMSPLYDPSANPPAQVPIDLDIDENLGVEMIREMLWQ EMLQYHPEAARMVNM

BdMPK11 MRMEGGGAGAAAAAGGAHGLGAEQIKGTLTHGGRYVQYNVYGNLFEVSAKYVPPPIRVPVGRGACGIICAAIVQTREEVAIKKIGN AFDNQIDAKRTLREVKLLRHMNHENVISIKDIIRPPRRNFNDVYIVYELMDTDLHLLRSNQLTDDHCQYFLYQVLRGLKYVHSAN VLRDLRPSNLLNAKCDLKIGDFGLARTTTTETDFMMEYV VTRWYRAPELLNCSSEYTAIDMWSVGCILGEIATREPLFPKDYVHQ LRLITELGSPDDTSLGFLRSDNARRYVRSLPQYKQQRSRFPNMSSGAMDLLERMLVDFPNKRITVDEALCHPYLASHLEINDEPVC PAFSDFEQPSFTEEDIKELIWRESVKFNPEPIH

BdMPK14 MAMLVDPNGMGNGQKHYYSMWQTLFEIDTKYVPIKPIGRGAYGIVCSSINRETNEKVAIKKIHNVDNRVDALRTLRELKLLRHLRH ENVISLKDIMPVQRRSFKDVYLVYELMDTDLHQIKSPQGLSNDHCQYFLYQLLRGLKYLHSAIELHRDLKPGNLLVANCNDLKICDF GLARTNNSKGFQFMTEYV VTRWYRAPELLCCDNYGTSIDVWSVGCIFAEALLGRKPIFPGTECLNQLKLVNVLGTMSESDLEFIDNP KA RRYIKTLPYTPGVPLASMYPHAHPLAIDLQKMLIFDPTKRISVTEALEHPYMSPLYDPSANPPAQVPIDLDIDENISADMIREMMWQE MLHYHPEAATAISM

BdMPK16 MDFFTEYGEGRYKIEEVIGKGSYGVVCSALDTHGTGDKVAIKKINDIFEHVSDATRILREIKLLRLLRHPDIVEIKHILLPPSRREFKDIYV VFELMESDLHQVIKANDDLTPEHYQFFLYQLLRGLKYIHTANVFHRDLKPKNILANADCKLKICDFGLARVAISDTPAIFWTDYIATRW YRAPELPGSFFSKYTPAIDIWSIGCIFAELTGKPLFPKGNV VHQDLITDLDGTPSAETIARIRNEKARRYLSMRKKTVPFTQKFPNAD PLALNLLERMLAFDPKDRPSAEALADPYFKNIASVDREPSAQIPITKLEFEFERRRITKDDIRELIYREILEYHPNMLREFLEGAEPTGFM YPSAVDHFKKQFTFLEEYAKGSTAAPPERQHNSLPRPSVIYSDNRPNQANITDDL SRC AIRDNTQKAQKDSASVGANRIPHGAAAA AARPGKVVGSVLRYGNCSTSGTEQYEQRRVRSPIAGPVGTSYSSYPRRNNTCKSETGEAERIDTNGGGPPKPYVANKLPATVDGRN GHW

BdMPK17 MVGGGIVDGFRLFRHRTPSGSGPSSNQSSAGEESSDIDAVVEDLDLVLRAIRVPKRKMPLPVESHKKNILEKEFFTEYGEASQYQIQ EVIGKGSYGVVAAAVDTRTGERVAIKKINDVFEHVSDATRILREVKLLRLLRHPDVVEIKHIMLPPSRREFQDIYVVFELMESDLHQVIR ANDDLTPEHYQFFLYQLLRALKYIHAANVFHRDLKPKNILANSCKLKICDFGLARVSFNDAPTAIFWTDYVATRWYRAPELPGSFFSK YTPAIDIWSIGCIFAELTGRPLFPKGNV VHQDLITDLDGTPSSETLSRIRNEKARRYLSMRKKHVPVLTQKFPNVDPALRLLGRLLAF DPKDRPSAEALADPYFAVLANVEREPSRNPISKLEFEFERRKVTKDDVRELIYREILEYHPQMLQYEMQGGEQLSFLYPSGVDRFRKQ FAHLEENYSKGERGSPQRKHASLPRQRVGASNDNDQHASDQERGADSIAPATGNPPGSQDAGQHVSGGQNGVGTSTNISPRSYQK SASISASKCVVNANKNPEYDDDISEMEMGAVDGLSEKVSRRMHP

BdMPK20-1 MQQDQRKSSAEAEFFTEYGDASRYKIQEIVGKGSYGVVCSAIDVHTGEKVAIKKIHDIFEHISDAARILREIKLLRLLRHPDIVEIKHIM LPPSRREFKDIYVVFELMESDLHQVIKANDDLTKEHYQFFLYQLLRALKYIHTANVYHRDLKPKNILANSCKLKICDFGLARVAFNDT PTTIFWTDYVATRWYRAPELPGSFFSKYTPAIDVWSIGCIFAELTGKPLFPKGNV VHQDLITDLDGTPSMDTISRVRNEKARRYLS MRKKEPIFQKFPNADPLALDQLLAFDPKDRPTAGEALSHYPFKGLAKVEREPCQPITKMEFEFERRRATKEDIRELIFREILEYH PQLLKDYINGTERTTFLYPSAVDQFRKQFAHLEENSESGPVVPMDRKHTSLPRSTIVHSAPIHAKEQPRIGPSRDRPLTDES YKNPRDSEK YSGNVPRSSHHSQAPQVPTARPRVGPVLPYENVGTSHYPDRRVAMNSGYPPQQIPQTYGYQTGKSACSEPSQAERYTLHQQ AYACANSSTAPDVALDMRAPPFHQAGPKSGSSDRLTAETNLYTRSLNGIVATTSGVAASAHKRVSVVPYGMQMY

BdMPK20-2 MSTDVDFFEYGDANRYRIQEVIGKGSYGVVCSAMDQTRQKVAIKKIHNIFDHVSDAARILREIKLLRLLRHPDVVEIKHIMLPPSRK DFKDIYVVFELMESDLHQVIKANDDLTKEHYQFFLYQLLRALKYIHTASVYHRDLKPKNILANSCKLKICDFGLARVAFNDTPTTVF WTDYVATRWYRAPELPGSFFSKYTPAIDIWSIGCIFAELTGKPLFPKGNV VHQDLITDLDGTPSMDTISRVRNEKARRYLSMRKKD VPVFSKFPNADPLGLKLEKLLAFDPKDRPTAEALTDYFKSLSKPDREPSQPIRKVEFDFEHRMSKDDIRELIFQEILEYHPQLLK

NYIDGTEKTTFLYPSAVDQFKKQFSHLEESDGSVPVPTERKHAASLPRSTTVHSTPIPAKEQPLVASSRGRPIANEPCKPWAPGNVPGASQ  
TAHVAQAGRAVGVGSPVPPYESGSGKYPPYDATSRAVSSGYPPQKIPQTYGYHHHHQTPGAGQSSQAMGGYACGYTKGTTPPAAAQ  
DMRASPHYHRSAGTKNDPLNRLAAESDIYTRSLNGIVAAAAAGTGAHRKVGAVPFGMSGMY

BdMPK20-3

MQHGDHLHKKSAEMDFFAYDDANRYKILEVIGKGSYGLVCSANDLQTGEKVAIKKIHNIFEHISDAARILREIKLLRLLRHPDVVEIK  
HILLPPSKKDFKDIYVVFELMESDLHQVIKANDDLTREHYQFFLYQMLRALKYMHTANVYHRDLKPKNVLANANCKLKICDFGLARV  
AFSDAPTTVFWTDYVATRWYRAPELCSFYSKYTPAIDISIGCIFAELVIGKPLFPGKNVVHQDLITDILGTPSLDAISRVRNDKARKY  
LTCMRKKQPAFSQKFPKADPLALQLLRLLAFDPKDRPSAEEALADPYFNGLAKVEREPCSQPIKIEFEFEGRVTKEDIKELIFEILE  
YHPQLLKEHIIGKERPNFVHLSAVDQFKKHFTQLEENDNETGAAVSLQRKHSSLPQAFNHR

BdMPK20-4

MQTTEQQRKKSSEMDFSEYGDANRYKIQEVIGKGSYGVVCSAIDQHTGDKVAIKKIHNIFEHLSDAARILREIKLLRLLRHPDIVEIR  
HIMLPPSRDFKDIYVVFELMDTDLHQVIKANDDLTKEHHQFFLYQMLRALKYIHTANVYHRDLKPKNILANANCKLKICDFGLARVA  
FNDTPPTVFWTDYVATRWYRAPELCSFFTKYSRAIDISIGCIFAELTGKPLFPGKNVVHQDLMTDLLGTPSLDTSRIRNEKARRY  
LSSMRKKQSVSFSERFPKADPAALKLLQRLLAFDPKDRPTAEALADPYFKGLGKVEREPCSQPIKMEFEFERKNVTKADV KELIFREI  
LEYHPQLLKDYMNGTEKTNFLYPSAVDNFRQFANLEENGKGGAVVPPDRKHVSLPRNTTVHSTPIPKDQKYSQVPRIPTRGRPR  
VVGPIPFENSSTMDPYSQRRVARNPVLPAAATNLSAYAYRNSDNERELQEQLEKDRMQYHPMQRFMDAKMVPSPDLRSTSYMPKG  
VPKADVAERSALQSNMMQGIAPFNGIATVGGAFNKVSAVQYGVSRMY

BdMPK20-5

MPEANAAARGGGGGDARAAEQRSNNKSEMGFFSEYVDASRYKILEIIGKGSYGVVCSAIDQETGDKVAIKKIHNIFEHLSDAARIL  
REIKLLRLLRHPDIVQIKHIMLPPSRDFRDIYVVFELMDTDLHQVIKANDDLTKEHYQFFLYQMLRALKYIHTANVYHRDLKPKNILA  
NANCKLKICDFGLARVAFNDTPPTVFWTDYVATRWYRAPELCSFFTKYSIPAIDTWSIGCIFAELTGKPLFPGKNVVHQDLMTDLLG  
TPSTETISRINDKARKYLSSMRKKQPIPFSEKFPNADPSALKLLERLLAFDPKDRPTAEALAHFYKRLARVEREPCSQPIKTEFEFE  
RRKFTKEDVKELIFREILEYHPKLLKDYMNGSEKTSFLYPSAVDNFRQFANLEIDGGRSGAADRKHFSPLRPTTVHSAPIPTNGPTSQ  
VPQRIPTARPRVSSAMQTDNPSVSDRHNGRRVARDPAVPPAAAYHLKSDYSRQHQQEFKDRVRPDRQRQEELEKDRMQYRPGH  
HSMDAKVAEISPYMRSSPYIPPFNGIAAVASGYSKVAAVTRMY

BdMPK21-1

MGLLRWLRHHRSSRVSSSSSHLPSNTTSSSSTDLRAHSLPQHGDHGEVVEWEDAAEGPDSPEEYIVVVLGDDEQGVVAARA  
PVRTKPPRVMDPGKKTSEEFFTEYGEANRYKVEVIGKGSYGVVAAVDTQTGERCAIKKINDVFDHVS DATRILREIKLLRLLRHPDI  
VEIKHIMLPPSRREFRDIYVVFELMESDLHQVIKANDDLTPEHHQFFLYQLLRGMKYIHTANVFHRDLKPKNILANADCKLKICDFGLA  
RVSFNDGAPSAIFWTDYVATRWYRAPELCSFFSKYTPAIDISVGCIFAEMLTGKPLFPGKNVVHQDLMTDLLGTPSAESLSKIRNEK  
ARRYLSNMRKKPKVPLTKKFPIDPMALHLLERLLAFDPKDRPSADEALTDPYFTGLANSEREPITQPIKLEFEFEKRLAKDDVRELI  
YREILEYHPHMLQEYLRGGGDQMSFMFPGVDRFKRQFAHLEEGAKGEKSSPQLRQNASLPRERVIGNKHGDGDYNMKLVNVEKPE  
ELASVSDGISKPLMSARSLKSETMSASKCIGEIKNKDEDSLSECVETDDDDVSQKIAQLKT

BdMPK21-2

MESGRWRKFMSRREVEKSVIFASTKRSGRTWRTAYYRKSIRDCEGKEKCEVLMRKEKQENTSRYTRTRGRRGKSGLQGSDEAEFF  
TEYGEANRYEVGEVVGKGSYGVVAAVDTHTGERVAIKKINDVFEHVSDATRILREIKLLRLLRHPDIVEIKHILPPSRREFRDIYIIFEL  
MESDLHQVIKANDDLTPEHHQFFLYQLLRGMKYIHAANVFHRDLKPKNILANADCKLKICDFGLARVSNFNDTPSAIFWTDYVATRWYR  
APELCSFFSKYTPAIDISIGCIFAEMLSGRPLFPGKNVVHQDLMTDLLGTPSAESLSRIRNEKARRYLGNMRKKHPVPFSQKFPVVD  
PMALDILLERLLAFDPKDRPTAEALADPYFTGLANSREPTTQPIKLEFEFERRKLARDDVRELIYREILEYHPQMLHEYHHGGDQA  
NFVYPSGVDRFKRQFVHLEEGVTKGEKTSPLRQHASLPRERIIGDELGRPNADYCIKLVHGEEPHTSVTDGLSKPLLARNFLKS  
ESISASQCVVIKEKREKDTLLKTKSFYFVHSDHARADSSVQD

OsMPK2

MRMEGGGGGGHGHGGGGGGHGGGIGGGEAQIKGTLTHGGRYVQYVNYGNLFEVSSKYVPIRPIVGRGACGIICAVVNAQTRQ  
EVAIKKIGNAFDNQIDAKRTLREIKLLRHMDHDNVISIKDIIRPPRRNFNDVYIVYELMDTDLHLLRSNQPLTDDHCQYFLYQVLRGL  
KYVHSANVLRDLRPSNLLNNAKCDLKIGDFGLARTNETDFMMEYVTRWYRAPELLNCSYTAIDISVGCILGEIVTREPLFP  
GKDYVHQLRLITELIGSPDDSSLGFLRSDNARRYVRLPQYKQFRARFPTMSSGAMDLLERMLVDFPSKRITVDEALCHPYLASLHE  
IYDEPVCAPFSDFEQPSLTEEDIKEIHWREALKFNPEPIH

OsMPK3

MDGAPVAEFRPTMTHGGRYLLYDIFGNKFEVTNKYQPPIMPGRGAYGIVCSVMNFETREMVAIKKIANAFNNDMDAKRTLREIKLLR  
HLDHENIIGIRDVIPPPIQAFNDVYIATELMDTDLHIIIRSNQELSEEHCQYFLYQILRGLKYIHSANVIHRDLKPSNLLNANCDLKICD  
FGLARPSSESMDMTEYVTRWYRAPELLNSTDYSAADVWSVGCIFMELINRQPLFGRDHMHQMLRITEVIGTPTDDELGFIRNED  
ARKYMRHLPQYPRRTFASMFPRVQPAALDLIERMLTFNPLQRITVEEALDHPYLERLHDIADEPICLPEFSDFEQKALNEDQMKQLIFN  
EAIEMPNIRY

OsMPK4

MDSSGGAGGGGAQIKGMGTHGGRYVLYNHYGNFVEVSSKYAPPPIRPIVGRGAYGIVCAAVNSENGEEVAIKKIGNAFDNHIDAKRTL  
REIKLLRHMDHENIIAIKDIIRPPRRDNFNDVYIVSELMDTDLHQIIRSNQPLTDDHCQYFLYQLLRGLKYVHSANVLRDLKPSNLFN  
ANCDLKIADFLARTTETDLMTEYVTRWYRAPELLNCSQYTAIDVWSVGCILGEIVTRQPLFGRDYIQQLKLITELIGSPDDSSL  
GFLRSDNARRYMKQLPQYPRQDFRLRFRNMSAGAVDLEKMLVDFPSRRITVDEALHHPYLASLHDINEPTCAPFSDFEQPSFTEE  
HIKELIWRESLAFNPDPY

OsMPK6

MDAGAQPPTDEMAEAGGGQPPAAAAAAGAGAGAMMENIQAATLSHGGRFIQYINIFGNVFEVTAKYKPPILPIGKAYGIVCSALNS  
ETGEQVAIKKIANAFDNKIDAKRTLREIKLLRHMDHENIVAIRDIIPPQRNSFNDVYIAYELMDTDLHQIIRSNQALSEEHCQYFLYQILR  
GLKYIHSANVLRDLKPSNLLNANCDLKICDFGLARTTSETDFMTEYVTRWYRAPELLNSSEYTAIDVWSVGCIFMELMDRKP  
FGRDHVHQLRLLMELIGTPNEADLDFVNENARRYIRQLPRHARQSFEKFPVHPLAIDLVEKMLTFDPRQRITVEGALAHPYLASLH  
DISDEPVCSSPFSDFEQHALSEEQMKDLIYQEGLAFNPDIYQ

OsMPK7

MAMMVDPPNGMGNQKHYTMTWQTLFEIDTKYVPIKPIGRGAYGIVCSSINRATNEKVAIKKINNVFDNRVDALRTLRELKLLRHLR  
HENVIALKDIMMPVHRRSFKDYLVEYELMDTDLHQIISQPLSNHHCQYFLYQLLRGLKYVHSANVLRDLKPSNLLNANCDLKIC  
DFGLARTNNTKGFMTYVTRWYRAPELLCCDNYSIDVWSVGCIFAELLGRKPIFPGTECLNQLKLVNVLGTMSEADIEFIDNP  
KARKYIKTLPTYTPGILPMSYQAHPLAIDLQKMLVDFPSKRISVTEALEHPYMSPLYDPSANPPAQVPIDLDIDENLGVDMIREMMW

QEMLYHPEVVAGVNM

OsMPK14 MAIMVDPNMGNGQKYYYSMWQTLFEIDTKYVPIKPIGRGAYGIVCSSINRETNEKVAIKKIHNVDNRVDALRTLRELKLLRHLRH  
ENVIALKDIMMPVHRRSFKDVYLVYELMDTDLHQIISQGLSNDHCQYFLQLLRGLKYLHSAEILHRDLKPGNLLVNAVNDLKICD  
FGLARTNSSKGQFMTEYVTRWYRAPELLCCDNYGTSIDVWSVGCIFAEELLGRKPIFGTECLNQLKLIVNVLTGTMSESDLEFIDNPK  
ARRYIKSLPYTPGVPLASMYPHAHPLAIDLQKMLIFDPTKRISVTEALEHPYMSPLYDPSANPPAQVPIDLDIDENISADMIREMMWHE  
MLHYHPEVVAAMSAR

OsMPK15 MDFTEYEGENRYKIEEVIGKGSYGVVCSALDTHGTGDKVAIKKINDIFEHVSDATRILREIKLLRLLRHPDIVEIKHILLPPSRREFKDIYV  
VFELMESDLHQVIKANDDLTPEHYQFFLYQLLRGLKYIHTANVFHRDLKPKNILANADCKLKICDFGLARVAFSDTPTAIFWTDYATR  
WYRAPELCSFFSKYTPAIDIWSIGCIFAELLTGKPLFPGKNVHQLDIITDLLGTPSPETISRIRNEKARRYLSMRRKKPIPFQKFPNA  
DPLAMRLLERMLAFDPKDRPSAEALADPYFKNIANVDREPSAQPTKLEFEFERRITKEDIRELIYREILEYHPKMLREFLEGTESTGF  
MYPASVDHFKKQFAYLEEYAKGSTAAPPERQHNSLPRPCVVYSDNRQSTASVTEDLRCLIRDNNLKSQDSASV GASRIPQGAAR  
PKAVGSLVRYGNCSTSAEQYEQRRVVRNPAIAPNSSVPLGSSYPRRNQTCCKSETGDVERIDSSQTGPPKPYVANKLPATVDRSGH  
W

OsMPK16 MDFTEYEGENRYKIEEVIGKGSYGVVCSALDTHGTGDKVAIKKINDIFEHVSDATRILREIKLLRLLRHPDIVEIKHILLPPSRREFKDIYV  
VFELMESDLHQVIKANDDLTPEHYQFFLYQLLRGLKYIHTANVFHRDLKPKNILANADCKLKICDFGLARVAFSDTPTAIFWTDYATR  
WYRAPELCSFFSKYTPAIDIWSIGCIFAELLTGKPLFPGKNVHQLDIITDLLGTPSTEASIRIRNEKARRYLSMRRKKPIPFQKFPNA  
DPLALRLLERMLSFEPKDRPNAEEALADPYFRNIANVDREPSAQPTKLEFEFERRITKEDIRELIYRDILEYHPNMLREYLEGTESAG  
FMYPSAVDHFKKQFAYLEEYAKGSTAAPPERQHNSLPRPSVLYSDDRPQNTANIAEDLSKCVLGDNTQKMHQGSASVCANRVPQGG  
AARPGKVVGSALRYGNCSTSTAEQYEHRRDRNPALATNTVSPRGSYP

OsMPK17-1 MGGGGLVDGFRRLFHRRTASGNSQSSNAGEEAASSDLEVADDPDLVALRSIRIRVPRKRMPLPVESHKNTVEMEFFTEYGEASQYQI  
QEVIGKGSYGVVAAAVDTRTGERVAIKKINDVFEHVSDATRILREIKLLRLLRHPDIVEIKHIMLPPSRREFQDIYVVFELMESDLHQVIR  
ANDDLTPEHYQFFLYQLLRALKYIHAANVFHRDLKPKNILANSDCCKLKICDFGLARAFNDAPS AIFWTDYVATRWYRAPELCSFFSK  
YTPAIDIWSIGCIFAELLTGRPLFPGKNVHQLDIITDLLGTPSSETLSRIRNEKARRYLSMRRKKHAPVFSQKFRNTDPLALRLLERLLAF  
DPKDRSSAEALADPYFASLANVEREPSRHPISKLEFEFERRKLTKDDVRELIYREILEYHPQMLQEYMKGGEQISFLYPSGVDRFKRQF  
AHLEENYKGERGSPQRKHASLPRERGVSKDGYNQNTNDQERSADS VARTTVSPPMSQDAQQHGSAGQNGVTSTLSSRSYLKS  
ASISASKVAVKDNKEPEDDYISEEMEGSV DGLSEQVSRMHS

OsMPK17-2 MEFFTEYGEASQYQIQEVVVGKGSYGVVAAAVDTHTGERVAIKKINDVFEHVSDAIRILREIKVLRLRHPDIVIKHIMLPPTRREFRDIY  
VVFELMESDLHQVIEANHDLSPHHRFFLYQLLCAIKYIHSANVFHRDLKPKNILANSDCCKLKICDFGLARVAFNDSPSTIFWTDYVATR  
WYRAPELCSFFSKYTPAIDIWSIGCIFAELLTGRPLFPGKNVHQLDLITDLLGTPSSETLSRIRNENARGYLTGMQRKHPFISHKFNHNA  
DPLALRLLERLLAFDPKDRPTAEALADPYFRGISKLSREPSRLPVSKFEFEFERRKLTKDDVREMIYREILEYHPQMLQEYIRGGEQISF  
LYPSGVDRFKRQFAHLEENYSRGERSTPLRRQHASLPRERVCSSVSDSNQSDNEERRAISSARTMISPPRSQEKGNRASAYPNGIINL  
NSNPKIYLSASISASTCIIRGNKGPKEGISEDMEVYVELSDNVTRMLS

OsMPK20-1 MQQDQRKKSSTEADFFTEYGDASRYKIQEVIGKGSYGVVCSAIDVHTGKVAIKKIHDIFEHISDAARILREIKLLRLLRHPDIVEIKHIM  
LPPSRREFKDIYVVFELMESDLHQVIKANDDLTKEHYQFFLYQLLRALKYIHTANVYHRDLKPKNILANSNCKLKICDFGLARVAFNDT  
PTTIFWTDYVATRWYRAPELCSFFSKYTPAIDIWSIGCIFAELVTGKPLFPGKNVHQLDLMTDLLGTPSMDTISRVRNDKARRYLSM  
RKKEPILFSQKFPADPLADLLQKLLAFDPKDRPTAEALAHYFKGLAKVEREPCQPITKMEFEFERRVTKEDIRELIFREILEYHP  
QLLKD YINGTERTTFLYPSAVDQFRKQFAHLEENGGNGVPVMDRKHSTLPRSTIVHSTPIPAKEQPRIGRSRDKPSDEPYSNPREFDRFS  
GNAPRTSQAPQVRPTARPRVVPVLPYENGATKDSYDARRLAMNSGYPPQQQIPQAYGYQIPGKSACSELSQAERYTLHQAYTCA  
NSATVTDVALDMRAPPHLGGPKSDSSERLAAETNLYTRSLNGLAATAAGVAAS AHRKVGVPVPGMSRMY

OsMPK20-2 MAVKMRIGRRRAIQGIAEGGFWRVWGCREADSRGALWELVWGERSVRERNAAGAAEEVIALFIMDEMCDPASNLEYVVEKAKC  
DVHRTSSAEFFTEYGDANRYRIQEVIGKGSYGVVCSAIDLHTRQKVAIKKVHNIFEHVSDAARILREIKLLRLLRHPDIVEIKHIMLPPS  
RRDFKDIYVVFELMESDLHQVIKANDDLTKEHYQFFLYQLLRALKYIHTASVYHRDLKPKNILANSNCKLKICDFGLARVAFNDTPTTV  
FWTDYVATRWYRAPELCSFFSKYTPAIDIWSIGCIFAELVTGKPLFPGKNVHQLDLMTDLLGTPSMDTISRVRNEKARRYLSMRRKK  
DPVPFSQKFPNADPLALKLLQRLAFDPKDRPTAEALADPYFKGLSKIDREPCQPIRKLFEFEQKLSKEDIRELIFQEILEYHPQLQK  
NYRNGRERATFLYPSAVDQFKKQFNSLEESNGSGSAIPMERKHASLPRSTTVHSTPIPPKEQPLAASLSSRPVSDPECKNPVWMMGFS  
GNIPTSSQVSQVAKVPVAPGRPVGSVFPYETGSTNDPYGPRGPMSSGYPPQQQISQAYGYHQPARMNCVEQSQAMDAYKMHSQSQT  
QAYAYPNSKVADVALDMRGSTFHHSAGSKNGSLDRMVTQTDIYTRSLNGIVAAATSAGVGTNRKVGAVPISTSRMY

OsMPK20-3 MQTSNFRKKNAAEVDFFMGYGDVNRYEVLEVIGKGSYGLVCSANDIHTGKVAIKKIHNIFEHISDAARILREIKLLRLLRHPDIVEIKH  
IMLPPSKMDFRDIYVVFELMESDLHQVIKANDDLTREHYQFFLYQMLRALKYIHTANVYHRDLKPKNILANANCKLKICDFGLARVAF  
TDAPTTVFWTDYVATRWYRAPELCSFFSKYTPAIDIWSIGCIFAELVIGKPLFPGKNVHQLDLITDLLGTPSLDAISQVRNDKARKYL  
TCMRKKQPAFSHFKLADPLALQLLRKLLAFDPKDRPSAEALADPYFNGLAKVEREPCQPPIKMEFEFERRATKEDIKELIFQEIL  
EYHPQLLKEHISGTERPNFHLSVVDQFRKQFTQVEENLNGSAAVSLQRKHSSLPSTIVHSAIAPAKDYKHVASSSTKLAVDGWSNA  
QIQGVHANIAGESTIVRPAVSSERSLAPTLQWQPNMTHFLNHALCYQNTVFSGLLDATGPAQAIPTTTPYVDYRSGNLDLYQHHVSR  
EDVQSDTATAQAHAASHGVPVAVSYSPLPGTYRIT

OsMPK20-4 MAMQTMQTEQQQQRKGSPEMDFSEYGDANRYKIQEVIGKGSYGVVCSAIDQHTGDKVAIKKIHNIFEHLSAARILREIKLLRLL  
RHPDIVEIKHIMLPPSRREFKDIYVVFELMDTDLHQVIKANDDLTKEHHQFFLYQMLRALKYIHTANVYHRDLKPKNILANANCKLKIC  
DFGLARVAFNDTPTTVFWTDYVATRWYRAPELCSFFTKYSPAIDIWSIGCIFAELTGKPLFPGKNVHQLDLMTDLLGTPSMDTVTRI  
RNEKARRYLSMRRKKQVPVFSERFPKADPAALKLLQRLAFDPKDRPTAEALADPYFKGLAKAEREPSCQPITKMEFEFERRKVTKE  
DVKELIFREILEYHPQLLKYDMNGTEKTNFLYPSALDNFRRQFANLEENGGKNGDAVPSDRKHVSLPRTTIVHSAIPIPKDHQNTISQV  
PQRIPGRTGRGACPVIPFENLSAMGPYNQRRVVRNPVLPATTNLSAYAYHRKSDSSERELQOELEKDRMRYQPSEHFMDAKVVSHMS

HDLRASSYYVSKAKSDVADRAALQSNMMQGIGPFNGIAAVGGNYNKVSTVQYGVSRMY

OsmPK20-5  
MDFSEYGDSSRYKIQEIVGKGSYGVVCSAIDQHTGDKVAIKKIHNIFEHLSDAARILREIKLLRLLRHPDIVEIKHIMLPPSRDFKDIYV  
VFELMDTDLHQVIKANDDLTKEHHQFFLYQMLRALKYIHTANVYHRDLKPKNILANANCKLKICDFGLARVAFNDPTTTFVFTDYVA  
TRWYRAPELCSFFSKYSPAIDTWSIGCIFAELTGKPLFPGKNVHQDLMDTDLGTPSMDAISRIRNDKARRYLSMRKQPVPFSEK  
FPNVDPALAKLLQRLAFDPKDRPTAEEALADPYFKGLAKVEREPCQPIKMEFEFERRKVTKDDIKELIFREILEYHPQLLKDYMNGS  
ENTSFLYPSAVDNFRQQFAILEENGGKSGALDRKHVSLPRATTVHSTSIPPNEGLDATSQVTQRIPTARPGRTVGPVLPFENPGAADPHSA  
RRVVRNPMVPPAAANKSGYSYNLKSYSYSDRQHQEELEKDRVQYRPAQHLMDAKVAPDTPADIRSSQYFTRSPRTDLTDRAALQGS  
MLYGIAPFNIAAAGGYSKVGAVQYGVSRMY

OsmPK21-1  
MGGRARSILRWLRHRSRRVSSSSFHLLTTTGDVTVDLHDPREDAEAGDGWEEVHEGPESDPPEYIALVSEDAGTHLPVTEPRRMDP  
SKKEPDDFFTEYGEANRYKVSEVIGKGSYGVVAAAVDTQTGERVAIKKINDVFDHVSDATRILREIKLLRLLRHPDIVEIKHIMLPPSRREF  
RDIYVIFELMESDLHQVIKANDDLTPEHHQFFLYQLLRGMKYIHAASVFHRDLKPKNILANADCKLVCFGLARVFNTPSAIFWTD  
YVATRWYRAPELCSFFSKYTPAIDIWSVGCIFAELTGKPLFPGKNVHQDLMDTDLGTPSAESLAKIRNEKARRYLSNMRKPRVP  
FTKKFPQVDPMALHLLERLLAFDPKDRPSAEEALDTPYFNLANSEREPQAQPIKLEFEFEKRRKAKDDVRELIYREILEYHPHMLQEY  
LRGGDQMSFMYPSGVDRFKRQFAHLEEGVSKGEKSSPQLRQNASLPRERAIGNKHGDDEYHAKLVNVEKPCHASVTDGISKPLMSAR  
SLLKSESISASKCIGEKPKQDRDQEDSLTESMDETADEVSEKVAQLKT

OsmPK21-2  
MDAKKGSGEPEFFSEYGDASRYEVTEVVGKGSYGVVAAAVDTHTGGRVAIKKINDVFEHISDATRILREIKLLRLLRHPDIVEIKHIMLP  
PSRREFRDIYIIFELMESDLHQVIKANDDLTPEHHQFFLYQLLRGMKYIHAASVFHRDLKPKNILANADCKVKICDFGLARVFDTPSA  
IFWTDYVATRWYRAPELCSFFSKYTPAIDIWSVGCIFAEMLMGKPLFPGKNVHQDLMDTDLGSPSETISRIRNEKARRYLGNMK  
KPRVPFSQKFPGADPMALHLLERLLAFDPKDRPTAEEALDTPYFNLANSEREPQAQPIKLEFEFEKRRKAKDDVRELIYREILEYHPQ  
MMQKYLRRGGDQSNFLYPSGVDRFKRQFAHLEEGVAQGDKTSPLRQHVSLPRERVRNGDEPDPTADYCIKLVHGEQPHSSVTDGL  
NKPLLSARNFLKSESIGASQCVVIKEKREKDEESMSEYMNEAADGVPHKIAQLKT

AtMEK1  
MNRGSLCPNPICLPPLEQSISKFLTQSGTFKDGDLRVNKDGIQTVSLSEPGAPPIEPLDNQLSLADLEVIKVIKGGSSGNVQLVKKHKTQ  
QFFALKVIQLNTEESTCRAISQELRINLSSQCPYLVSQYQSFYHNLVSIIEFMDGGSLADLLKKVGVKVPENMLSAICKRVLRLCYIHH  
ERRIHRDLKPSNLLINHRGEVKITDFGVSKILTSTSLANSFVGTYPYMSPERISGSLYSNKSDIWSLGLVLECATGKFPYTPPEHKKGW  
SSVYELVDAIVENPPCAPSNLFSPEFCFSISQCVQKDPDRKSAKELLEHKFKVMFEDSDTNLSAYFTDAGSLIPPLAN

AtMEK2  
MKKGGFNNLKLAI PVAGEQSITKFLTQSGTFKDGDLRVNKDGVRIISQLEPEVLSPIKPADQLSLSDLDLVKVIKGGSSGVVQLVQH  
KWTGQFFALKVIQLNIDEAIRKAIQELKINQSSQCPNLVTSYQSFYDNGAISLILEYMDGGSLADFLKSVKAI PDSYLSAIFRQVLQGLI  
YLHHRDIHRDLKPSNLLINHRGEVKITDFGVSTVMTNTAGLANTFVGTYNYSMPERIVGNKYGNKSDIWSLGLVLECATGKFPYA  
PPNQEETWTSVFELMEAIVDQPPPALPSGNFPELSSFISTCLQKDPNSRSSAKELMEHPFLNKYDYSINLASVFTDAGSPLATLGNLGS  
TFSV

AtMEK3  
MAALEELKKKLSPLFDAEKGFSSSSSLDPNDSYLLSDGGTVNLLSRSYGVYFNELGLQKCTSSHVDESESETTYQCASHEMRVFGAI  
GSGASSVVQRAIHIPNHRILAKKINIFEREKRQQLTEIRTLCEAPCHEGLVDFHGAFYSPDSGQISIALEYMNGGSLADILKVTKKIPEP  
VLSLFLHKLLOGLSYLHGVRHLVHRDIK PANLLINLKGEPKITDFGISAGLENSMAMCATFVGTVTYMSPERIRNDSYSPADIWSLGL  
ALFECGTGEFPYIANEGPVNMLQILDDPSPTPPKQEFSEFCFSIDACLQKDPDARPTADQLLSHPFITKHEKERVLDATFVQSFIDPTQR  
LKDLADMLTIHYYSLFDGFDLWHHAKSLYTETS VFSFSGKHTSTEIFSALS DIRNTLTGDLPEKLVHVVEKLHCKPCGSGGVIIRA  
VGSFIVGNQLICSDGVAEGLPSFKDLGFDVASRRVGRFQEQVVESEGDILGKYFLAKQELIYTNLD

AtMEK4  
MRPIQSPGVSVPVKSRRRPPDLTLPLPQRDVS LAVPLPPTSGSGSGSSGASPSGSSASSTNTNSSIAKNSD LVRGNRIGSGAGG  
TVYKVIHRPSSRYALKVIYGNHEETVRRQICREIEILRDVNHPNVVKCHEMFDQNGEIQVLEFMDKGSLEGAHVWKEQQLADLSRQ  
ILSGLAYLHRSRHRDIKPSNLLINSKVNKIADFGVSRILAQTMDPCNSSVGTIAYMSPERINTDLNQGKYDGYAGDIWSLGVSILEYF  
LGRFPFVSRQGDWASLMCAICMSQPPEAPATASPEFRHFISCLQREPGKRRSAMQLLQHPFILRASPSQNRSPQLNHQLLPPRPLSS  
SSPTT

AtMEK5  
MKPIQSPSGVASPMKRLRKRPDLSLPLPHRDVALAVPLPPLPPSSSSAPASSSAISTNISAAKSLSELRVNRIGSGAGGTVYKVIHTPT  
SRPFALKVIYGNHEDTVRRQICREIEILRSDHPNVVKCHDMFDHNGEIQVLEFMDQGSLEGAHVWQEQLADLSRQILSGLAYLHRR  
HIVHRDIKPSNLLINSKVNKIADFGVSRILAQTMDPCNSSVGTIAYMSPERINTDLNHGRYDGYAGDVWSLGVSILEYFLGRFPFAVSR  
QGDWASLMCAICMSQPPEAPATASQEFRHFVSCCLQSDPPKRWASQQLLQHPFILKATGGPNLRQMLPPRPLPSAS

AtMEK6  
MVKIKSNLQKLSVPAQESPISSFLTASGTFHDGDFLLNQKGLRLTSDKQSRQSDSKELDFEITAEDLETVKVIGKGGGVVQLVRHK  
WVGKFFAMKVIQMNIEEIRKQIVQELKINQASSQCPHVVCYHSFYHNGAFSLVLEYMDRGLADVIRQVKTILEPYLAVVCKQVLL  
GLVYLHNERHVHRDIKPSNLLVNHKGEVKISDFGVASLASSMGQRDTFVGTYNYSMPERISGSTYDSSDIWSLGMVLECAIGRFP  
YLESEDQNPFSFYELLA AIVENPPPTAPSDQFSPEFCFSVACIQKDPARASSLDLLSHPFIKFKFEDKDIDLGILVGTLEPPVNYLR

AtMEK7  
MALVRKRRQINLRPLVPPLSVHLPWFVFSASTAPVINNGISASDVEKLVHVGGRSSGIVYKVVHKTTEIYALKSVNGDMSPAFTRQLA  
REMEILRRDTSYVVRQCQIFEKPIVGEVSILMEYMDGNGLESRLGAVTEKQLAGFSRQILKGLSYLHSLKIVHRDIK PANLLLNSRNEV  
KIADFGVSKIIITRSLDYCNSYVGTCAIYMSPERFSDAAGENSVDYAGDIWSFGVMILELFGVGHFLLPQGRPDWATLMCVVCFGEPPRA  
PEGCSDEFRSVDCCLRKESSEWRTASQLLGHFPLRESL

AtMEK8  
MVMVRDNQFLNLKLSPIQAPTIPPCRFPIIPATKVSATVSSCASNTFSVANLDRISVLGSGNGGTVFKVKDKTTSEIYALKVVKENWDS  
TSLREIEILRMVNSPYVAKCHDIFQNPSEVILMDYMDLGSLESLRGVTEKQLALMSRQVLEKGNLYLHEHKIVHRDIK PANLLRSKE  
EVKIADFGVSKIVRSLNKCNSVGTFAIYMSPERLDSEADGVTEEDKSNVYAGDIWSFGLTMEILVGYYPMLPDQAAIVCAVCFGEPP  
KAPEECSDDLKSFMDCCLRKKASER

AtMEK9  
MALVRERRQLNLRPLPPISDRRFSTSSSATTVTAGCNGISACDLEKLVNLGCGNGGIVYKVRHKTTEIYALKTVNGDMDFIFTRQL  
MREMEILRRDTSYVVKCHGIFEKPVVGEVSILMEYMDGGTLESRLGGVTEQKLAGFAKQILKGLSYLHALKIVHRDIK PANLLLNSK

|           |                                                                                                                                                                                                                                                                                                                                                                                                                                                                                                                                                                                              |
|-----------|----------------------------------------------------------------------------------------------------------------------------------------------------------------------------------------------------------------------------------------------------------------------------------------------------------------------------------------------------------------------------------------------------------------------------------------------------------------------------------------------------------------------------------------------------------------------------------------------|
|           | NEVKIADFGVSKILVRSLDSCNSYVGTCAYMSPERFDSESSGSSDIYAGDIWSFGLMMLLELLVGHFPLLPQRPDWATLMCAVCFGE<br>PPRAPEGCSEEFRSFVECCLRKDSKRWTAPQLLAHPFLREDL                                                                                                                                                                                                                                                                                                                                                                                                                                                        |
| AtMEK10   | MTLVRERRHQEPLTSLIPPLIYHGTAFAVSSSSSSPETSPIQTLNDLEKLSVLGQGSGGTVYKTRHRRTKTYALKVLRPNLNTTVTVEA<br>DILKRIESSFIIKCYAVFVSLYDLFCVMELMEKGSGLHDALLAQVVFSEPMVSSLANRILQGLRVLQKMGIVHGDIKPSNLLINKKGEVKI<br>ADFGASRIVAGGDYGSNGTCAYMSPERVDLEKWFVGGVEVGFAGDVWSLGVVLECYIGRYPLTKVGDKPDWATLFAICCNKVDIP<br>VSCSLEFRDFVGRCLEKDWKRKRDVEELLRHSFVKNR                                                                                                                                                                                                                                                                   |
| BdMKK1    | MRKPGKALALPSHESTIGKFLTQSGTFKDGDLVNKDGLRIVHNSEEAGEAPPVPLDDHQLSLDDLDIAIKVIGKSSGIVQLVRHKWTDQ<br>FFALKVIQLNIQESIRKQIAQELKISLSTQCQYVVTTCYQCFYVNGVISIVLEYMDGGSLADFLKTVRTRPEAYLAAICKQVLQGLMYLHH<br>EKRVIHRLDKPSNILNHRGEVKISDFGVSAAIASSAQRDTFTGTFTNYMAPERISGQKHGYMSDIWSLGLVMLECATGNFPYSPDSFYE<br>LLEAVVDQPPSAPTQDQFSPEFCFSISACIQKEATDRSSAQVLSHPFLSMYDDLNLADYFTTAGSPLATFKQIVL                                                                                                                                                                                                                         |
| BdMKK3-1  | MAGLEELKKKLQPLFDPPDKDGISTRVPFLEDNCDYSVSDGGTINLLSRFSGEYNINEHGFHKRSTGADESDFGEKAYRCASHDMH<br>IFGPIGNASSVVQRAIFIPVHRILALKKINIFEKEKRQQLNEMRTLCEASCYPGLVEFQGAFYMPDSGQISIALEYMDGGSLADVIKVK<br>KSIPEQVLAHMLKQVLLGLRVLHEVRHLVHRDIKPANMLVNLKGEAKITDFGVSAGLDNTMAMCATFVGTVTYMSPERIRNENYSYA<br>ADIWSLGLTILECATGKFPYVNEGPANMLQILDDPSPTPPADAYSPEFCFVNDCLQKDPDARPTCEQLFGHPFIKRYENAGVDLIAI<br>VKGVDPTERLKEIAEMLAVHYLLFNGSDGLWHHMKTIFYMEESTFSFSGNVYVGRNDIFDTLSSIRKCLKGDRPREKIVHVVEKLH<br>CRANETGIAIRVSGSLVGNQFLVCGEGLQAEGMPSVEELSIDIPSKRVGQFREQFMMLPGISMGSFHISRQDLYIIQA                                        |
| BdMKK3-2  | MAGLEELKKKLQPLMFNDPKDGFSTRVPPFEDTCDYSVSDGGTINLLSRFSGEYNINEHGFHKRSAGADESDFGEKAYRCASQDM<br>HIFGPIGNASSVVQRAIFIPVHRILALKKINIFEKEKRQQLNEMRTLCEACCYPGLVEFQGAFYMPDSGQISIALEYMDGGSLADVIK<br>KSIPEVPLAHLMLKQVLLGLRVLHEVRHLVHRDIKPANMLVNLKGEAKITDFGVSAGLDNTMAMCATFVGTVTYMSPERIRNENYSY<br>AADIWSLGLTILECATGKFPYVNEGPANMLQILDDPSPAPPENAFSSEFCFVNDCLQKADARPTCEQLLSPHFIKRYENAGVDLAA<br>YVKGVVNPEERLQIAEMLAVHYLLFNGSDGLWHHMKTIFYMEDSTFSFSGNLYVQSDIFDTLSNIRTKLKGDRPREKIVHVVEKL<br>HCRANETGIAIRVSGSFVSNQFLICGEGQAEGMPSLEELSIDIPSKRVGQFREQFMHPGRSMGICYISRQDLYIIQA                                             |
| BdMKK3-3  | MDGGWDGMRQRKRHRAGIPIPTYPLAASLEFCFVTAGACHTAPGPGSKIAASLFAALLFQRPASTSRAIFFCFVIMAAGLEDLRRR<br>VQPIFFDADGNVMPAPDDSEVLDGGTINLLSRSSDEYNINERGFHKRTIRSDDEYSSEKAFRCSDMHIFDSVGNASSVHRAIYV<br>PVHRVLALKKINIFEKERRQQLNEIITLSEACCYPGLVEFHGVFYTPDSEIYFALEYMDGGSLADIIRVKKFISEPVLHMLKQVLLALR<br>YLHEVRHLVHRDIKPANLNLKGDTKITDFGVTSLHDSIDMCATFLGSVTYMSPERIRNESYSYADIWSLGLTALECATGRYPYDV<br>NGGEADLMLQKADARPTCDQLLSHSFIKRYEGPVDLSEYNKSVHDPSERLSQAIAHMLAVHYLLIFDGGDDQWCHMKTFYQDSIF<br>SFSGETHVKSEIFETLSRIRKMLKGNPCEKIAHVMEKVCYCRSHGEEGMRRVRSVGSFVGNFVVCADGVRAEGLMSIDELSPDILSK<br>QAGHFQEDFFMEPGTALGCYVISKQELHIADT |
| BdMKK4    | MRPGGPPNARPQPGTGRARRRDLTLPLPQRDLTSLAVPLPLPPSSAPSSASSGSSLSMGAPTPPNSAGSAPPPPLAELERVR<br>IGSAGGTVWVRRHPTGRPYALKVLYGNHDDAVRRQITREIAILRTAEHPAVRCHGMYEQAGELQILLEFMDGGSLDGRRIASEAFL<br>ADVARQVLSGIAYLHRRHIVHRDIKPSNLLIDSARRVKIADFGVGRILNQTMDPCNSSVGTIAYMSPERINTDLNDGAYDGYAGDIWSF<br>GLSILEFYLGRFPLGENLKGQDWAALMCAICYSDSAPPPIASPEFKSFSISCLQKNPARRPSAAQLLQHRFIAGPQPQVLAAPPS                                                                                                                                                                                                                           |
| BdMKK5    | MRPAGSLPSPQPGTGRPRRRDLTLMPQRPDVSSSLAVPLPLPPSSGLAQPPAAAAAAPPPLGELERVRVGSAGGTVWV<br>VRRHPTGRPYALKVLYGNHDDAVRRQIAREIAILRTAEHPAVRCHGMYERGGELQILLEYMDGGSLDGRRIAEGLADVARQVLSG<br>IAYLHRRHIVHRDIKPSNLLIDSARRVKIADFGVGRILNQTMDPCNSSVGTIAYMSPERINTDLNDGAYDGYAGDIWSFGLSILEFYLGRF<br>PFGENLKGQDWAALMVAICYNDPPEPSAAAASPEFRGFISCLQKNPAKRLSAAQLLQHPFVAGPQPLAAPPS                                                                                                                                                                                                                                           |
| BdMKK6    | MRGKKPLKELKLSVPAQETSVDKFLTASGTFKDGELRLNQRGLRISEENGDEHQSTNMKVEDVQLSMDLEMIQVIGKSGGGVVQ<br>LVQHKWVGTFFYALKGIQMNIQEAVERKQIVQELKINQATQSPHIVSCHQSFYHNGVIYLVLEYMDRGLSADIHKQVKTILEPYLAVLCKQ<br>VLEGLLYLHHERHVIHRDIKPSNLLVNHKGEVKITDFGVS AVLASSIGQRDTFVGTNYMAPERISGSSYDYKSDVWSLGLVILECAIGR<br>FPYTPSEGEGLWLSFYELLEIAIVDQPPGAPADQFSPEFCFSISACIQKDAERMSASELLNHAFIKKEGKDLDRILVESLEPPMNVPE                                                                                                                                                                                                                |
| BdMKK10-1 | MALLREKRLQLSLHVPTRAADAQEAGLHRRPNPAAALPLAATTPAARSSQFRVADFEKLAVLGRNGGTVYKVRHRETCELYALKVQ<br>HCNGDATAEAEVLSRTASPFVVRCHSVLPAAASGDVAMLELVDGGSLDSIVKSRSRGQAEAFSFPPEEALAEVAAQALSGLAYLHAR<br>RIVHLDVCPGNLLVSTGGEVKIADFGIARVLPFRAGDDVRCATAYAGTAAYMSPERFDPEAHGGHYDPYAADVWGLGVTVLELLMGRY<br>PLLPAGQRPSWAALMCAICFGETPALSDGEASAELRGFVAACLHKDYRRRASVAELLAHPFVAGRDVAASKCALRKLVTASMS                                                                                                                                                                                                                         |
| BdMKK10-2 | MALVRQRRLQPLHLPLDHFALRPPAPAPTVAASSTSEAAGLRLSDFERISLLGQNGGTVYKARHRRAAAQPPVALKLFVAGDPSAA<br>REAEILRLAADAPHVRLHAVVPSSPAAGAEQPPAALALELLPGGSLAGLLRRLGRSMGERPIAAVARQALLGLDALHALRVVHRD<br>LKPSNLLGSHGEVKIADFGAGKVLRRRLDPCASYVGTAAAYMSPERFDPEAYSGDYDPYAADVWSLGLAILELYLGHFPLLPAGQRPD<br>WAALMCAICFGDAPEAPAAASEEFRDFVARCLEKAGQRASVAELLEHPFIAERDAEEAKRALAAALVAEAGL                                                                                                                                                                                                                                      |
| BdMKK10-3 | MALLREKRLQLSLHVPTRAEEALDAVHRRPNPVAATLAASTPAAARSSQFRADFDKLTVLGRNGGTVYKVRHRETCELYALKVQ<br>CNGDPTAAAEAEVLSRTASPFVVRCHSVLPAAASGDVAMLELVDGGSLDSIVKSRRAHAFFPPEEALAEVAAQALSGLAYLHARRIVH<br>LDIKPGLNLYSTGGEVKVADFGIAKVLPRAGADDARCKSYAGTAAYMSPERFDPEAHGGHYDAYAADVWGLGVTVLELLMGRYPLLP<br>AGQRPSWPALMCAICFGETPVLSDGEASAELRGFVAACLKDKRTRASVAELLAHPFVAGRDVATSKCALRKLVTASSTSP                                                                                                                                                                                                                              |
| BdMKK10-4 | MASAKERRLPQLHLKLDVPTCAFRCAPAPAPATAATPATSASRPPHGEFRLNDFDRLSVLGRNGGTVYKSHRRTSALYALKKIIHGA<br>HARPGAADDEADIVRRVVDSPNVVRCHSVLPTASGDAAALLELVDGGSLDSLGGGFLPEAAVADVAQAALSGLAHLRARRVAHR<br>DIKPANLLSAAAGEVKIADFGIAKVVVSGAGGRARALAYEGTVAYMSPERFDSEHADADPYAADVWGLGVTLELLMGRYPLLPAG<br>QKPTWAALMCAICFGELPALPEGAASLEFRGFVAACLKDKRTRASVVELLAHPFVAGRDVAASRRALREAIERRCS                                                                                                                                                                                                                                     |
| BdMKK10-5 | MALTVRQRRLPQLHISLDLPCSFRCNPPVAATASTSGEFRASDFERLAVLGRNGGTVYKVAHRRRTSAQYALKVLHGGGDPGAAAA<br>EADVLRRAADSPYVVRCHSVFPAASGSETALLELVDGGSLDSVRRGVGVSVFFPEAALAEVAAQALAGLAHLHARRVHRDIKPA                                                                                                                                                                                                                                                                                                                                                                                                               |

NLLVSGAGGVK VADFGIAMV LPSRAGGERCAAAYEGTVAYMSPERFDSEGRADADPRGADVWGLGVTVLELLMGRYPLLPAQKPT  
WAALMCAICF GELPALPEGAAS TELRGFIAACLRKDHTKRASVAELIKHPFVAGRNM AASRLALRRLVAGA

OsMKK1 MGKPGK LALPSHESTIGKFLTQSGTFKDGDLLVNKDGLRIVSQSEEGEAPPIEPLDHNQLSLDDDLDAIKVIGK GSSGIVQLVRHKWGTGQF  
FALKVIQLNIQENIRRIAQELKISLSTQCQYV VACCQCFYVNGVISIVLEYMDSGSLSDFLKTVKTIPEPYLAAICKQV LKGLMYLHHE  
KHIIHRDLKPSNILINHMGEVKISDFGVSAIIASSAQRDTFTGTYNMAPERISGQKHGYMSDIWSLGLVMLELATGEFPYPPRESFYEL  
LEAVVDHPPSPAPSDFSEEFCSFVSACIQKNASDRSSAQILLNHPFLSMYDDL NIDLASYFTT DGSPLATFNTSNRYDDR

OsMKK3 MAGLEELK KKLQPLLFD DDPKGGVSSRVLPEDTCD SYVSDGGTVNLLSRSLGEYNINEHG FHKRSTGPEESDSGEKAYRCASHDM  
HIFGPIGNASSV VQRAVFIPVHRILAL KKNIFEKEKRQQLNEMRTLCEACCYIGLVEFQGFAYMPDSGQISIALEYMDGGS LANVIKI  
KKSIPVLAHMLQVLLGLRYLHEVRHLVHRDIK PANLLVNLKGEAKITDFGV SAGLDNTMAMCATFVGT VTYMSPERIRNENYSYA  
ADIWSLGLAILECATGKFPYV NVEGPANMLQILDDPSPTPKDSYSSEFC SFINDCLQKDADARPSCEQLLSHPFIKRYENTTVDLVAYV  
KSIVDPTERLQKIAEMLAVHYLLFN GTDGIWHYMKTFYMEESTFSFGNVYVQSDIFD TSLNRKLLKGD CPREKIVHVVEKLHCR  
AHGETGAI RVS GSFIVGNQFLICGEG LQAEGMPSLEELSIDI PSKRVGQFREQFIMEPGSSMGCYI LRQDLYIIQA

OsMKK4 MRPGGPPSLRAGLQQQQQQPGTGRSRRRDLTLP LQRDLTSLAVPLPLPSSAPSSTSSSGSSSLGGVPTPPNSVGSAPPAPPLSE  
LERVRRIGSGAGGTVWVVRHRPTGRPYALKVLYGNHDDAVRRQITREIAILRTAEHPAVVRCHGMYEQAGELQILLEYMDGGSLEGR  
RIASEAFLADVARQVLSGIAYLHRRHIVHRDIKPSNLLIDSGRRVKIADFGVGRILNQTM DPCNSSVGTIAYMSPERINTDLNDGAYDGY  
AGDIWSFGLSILEFYMGRFPLGENLGKQGDWAALMCAICYSDSPAPPPNASPEFKSFISCLQKNPARRPSAAQLLQHRFVAGPQQQQ  
PQPQLAPPPS

OsMKK5 MRAGDMPGRGARRRDLTLPMPQRDAP TSLAVPLP LPPAATTTTSAPPAGGAMHPLASAGAAPPPLEELERVRV GSGAGGTVWV  
RHRGTGKEYALKVLYGNHDDAVRRQIAREIAILRTAEHPAVVRCHDMYERGGELQILLEYMDGGS LDGRRIADERFLADVARQVLSGI  
AYLHRRHIVHRDIKPSNLLIDSGRRVKIADFGVGRILNQTM DPCNSSVGTIAYMSPERINTDLNDGAYDGYAGDIWSFGLSILEFYMKGK  
PFGENLGKQGDWAALMCAICYSDPPEPPAAVSPEFRS FVGYCLQKNPAKRPSAAQLMQHPFVAGPQPPLAAPPPS

OsMKK6 MRGKPKHKLKLSVPAQETPV D KFLTASGT FKGELRLNQRGLQLISEETADEPQSTNLKVEDVQLSMD DLEMIQVIGK GSGGIVQLV  
RHKWVGTLYAL KGIQMNIEAVRKQIVQELKINQATQNAHIVLCHQSFYHNGVVIYLVLEYMDRGLSADI IKQVKTILEPYLAVLCKQVL  
EGLLYLHHERHVIHRDIKPSNLLVNRKGEVKITDFGVSAVLASSMGQRDTFVGTYNMAPERISGSSYDYKSDIWSLGLVILECAIGRFP  
YIPSEGEGLWLSFYELLEAIVDQPPSAPADQFSPEFCAFISSCIQKDP AERMSASELLNHPFIKFKFDKDLDRILVESLEPPMNISE

OsMKK10-1 MAKLRRERQLR LSVASPPPHLDHPFAALPSTPPGSPVLA EEMLSV VGRGAGGTVYRARHRRTGAA LAVKEMRDDGAALREAGA  
HLRVA AADPHPSVVR LHGV CVGHPVAGNRFVYL VLEYLPEGLSDV LVRGALPEPAIAGVTRCVLRGLSHLHRLGVAHGDVKPSNLL  
VGHRGEIKIADFGASRVVTGRDEAHHQSPGTWAYMSPEKLHPEFGGGGADFSGDVWSLGVVLECHAGRFP LVAAGERPDWPALV  
LAVCFAAAPEVPVAASPEFGGFVRRCLEKDWRRRATVEELLGH PFVAGKPSRCERQNEWRTTFQDKTGQVNTSIYGEE

OsMKK10-2 MALVRQRRLHPLHLT PLDHFALRPPAPQQQQPAVAPSTSSDVRLSDFERISVLGHNGGTVYKARHRRGCPAQQPLALK LFAAGDLS  
AAREAIELRLAADAPHVVR LHAVVPSAAGVEEPAALALELMPGGSLAGLLRRLGRPMGERPIAAVARQALLGLEALHALRIVHRDLK  
PSNLLGADGEVKIADFGAGKVLRRRLDPCASYVGTAA YMSPERFDPEAYSGDYDPAADVWSLGV AILELYLGHFPLLPV GQRPDW  
AALMCAICFGEAPEMPAAASEEFRDFVSRCKEKKAGRRASV GELLEHPFAERDAADAQRSLAALVAEAEQSGDL

OsMKK10-3 MALIREKRFSQM NLSLHVSRVPFQDA AAAARRQC PVPVAAASTSPTASRASQFRLADFERAVLGRNGGTVYKVRHRET CALYAL  
KVQHSAGGELAGVEADILSR TASPFFVRCHAVLPASASAGDVALLELV DGGSLASVAARAGAPPEAAVAEVAQA LSGLACLHAR  
RVVHRDIKPGNLLSV DGEVKIADFGIAK VPPRRGGEHRAAYEYEGTAA YMSPERFDSELHGDGADPFAADVWGLGVTVLELLMAR  
YPLLPAQKPSWAALMCAICF GELPPLPDGAASPELRAFLAACLHKDHTKRPSAAHLLTHQFVAGR NVAASKLALRRLVAGA

AtMAPKKK1 WRKGQLIGRGAFTVYMG MNLD SGELLA V KQVLIANFASKEKTQAHIQELEEEV KLLKNLSHPNIVRYLGTVREDDTLNILLEFVP  
GSSISLLEKFGFPFESVVRTYTRQLLLGLEYLHNHAIMHRDIKGANILVDNKGCIKLADFGASKQVAELATMTGAKSMKGTPTYWMA  
PEVILQTGHFSFADIWSVGCTVIEMVTGKAPWSQYKEVA AIFHIGTTKSHPPIPDTLSSDAKDFLLKCLQEVPNLRPTASELLKHFPV

AtMAPKKK2 WRKGQLIGRGAFTVYMG MNLD SGELLA V KQVLITSNCASKEKTQAHIQELEEEV KLLKNLSHPNIVRYLGTVREDET LNILLEFVPG  
GSISLLEKFGAFPESVVRTYTNQLLLGLEYLHNHAIMHRDIKGANILVDNQGCIKLADFGASKQVAELATISGAKSMKGTPTYWMAPE  
VILQTGHFSFADIWSVGCTVIEMVTGKAPWSQYKEIAAIFHIGTTKSHPPIPDNISSDANDFLKCLQEPNLRPTASELLKHFPV

AtMAPKKK3 WKKGKFLGSGTFGQVYLFNFSEKGMCAI KEVKVISDDQTSKECLKQLNQEINLLNQLCHPNIVQYYGSELSEETLSVYLEYVSGGSI  
HKLLKDYGSFTPEVIQNYTRQILAGLAYLHGRNTVHRDIKGANILVDPNGEIKLADFGMAKHVTAFASTMSFKGSPYWMAPEVMSQ  
NGYTHAVDIWSLGTILEMATSKPPWSQFEGVA AIFKIGNSKDTPEIPDHLSDAKNFIRLCLQRNPTVRPTASQLLEHPFL

AtMAPKKK4 WKKGRLLMGSGFHVYLFNFSESGEMCAMKEVTLCSDDPKSRESAQQLGQEISVLSRLRHQNI VQYYGSETVDDKLYIYLEYVSGGS  
IYKLLQEYGFGENAIRNYTQQILSGLAYLHAKNTVHRDIKGANILVDPHGRVKVADFGMAKHITAQSGPLSFKGSPYWMAPEVIKNS  
NGSNLAVDIWSLGTILEMATSKPPWSQYEGVPAMFKIGNSKELPDIPDHLSEEGKDFVRKCLQRNPANRPTAAQLLDHAFV

AtMAPKKK5 WKKGKLIGRGTFGSVYVANSSETGALCAMKEVELFPDDPKSAECIKLEQEIKLLSNLQHPNIVQYFGSETVEDRFFIYLEYVHPSGIN  
KYIRDHCMTESVVRNFRHILSGLAYLHNKKTVHRDIKGANLLVDSGVVKLADFGMAKHITGQRADLSLKGSPYWMAPELMQ  
AVMQKDSNPD LAFVAVDIWSLGTIEMFTGKPPWSEFEGAAAMFKVMRDSPPIPESMSPEGKDFLRCLCFQRNPAERPTASMLLEHRFL

AtMAPKKK6 YMLGDEIGK GAYGRVYIGLDLENGDFVAIKQV SLENIGQEDLNTIMQEIDLKLNHNK NIVKYLGLSKTKTHLHIILEYVENGSLANI K  
PNKFGFPFESLVTVYIAQVLEGLVYLHEQGV IHRDIKGANILTTKEGLVKLADFGVATKLN EADFNTHSVVGTPTYWMAPEVIELSGVC  
AASDIWSVGCTIHELLTCVPPY YDLQMPALYRIVQDDTPIPPDLS PDITDFLRCLCFK KDSRQRPDAKTLLSHPWI

AtMAPKKK7 YMLGDEIGK GAYGRVYKGLDLENGDFVAIKQV SLENIVQEDLNTIMQEIDLKLNHNK NIVKYLGS SKTKTHLHIILEYVENGSLANI I  
KPNKFGFPFESLVAVYIAQVLEGLVYLHEQGV IHRDIKGANILTTKEGLVKLADFGVATKLN EADVNTHSVVGTPYWMAPEVIEMSG  
VCAASDIWSVGCTIHELLTCVPPY YDLQMPALFRIVQDDNPPIPDLS PDITDFLRCLCFK KDSRQRPDAKTLLSHPWI



|            |                                                                                                                                                                                                                                                                                   |
|------------|-----------------------------------------------------------------------------------------------------------------------------------------------------------------------------------------------------------------------------------------------------------------------------------|
| AtMAPKKK8  | WQKGQLLRGSFSGSVYEGISGDGDFFAVKEVSLDDQGSQAQECIQQLEGEIKLLSQLQHQNIVRYRGTAKDGSNLYIFLELVTQGSLL<br>KLYQRYQLRDSVSVSLYTRQILDGLKYLHDKGFIHRDIKCANILVDANGAVKLADFLAKVSKFNDIKCKGTPFWMAPEVINRKDS<br>GYGSPADIWSLGTCTVLEMCTGQIPYSLEPVALFRIGRGTLPVDPDTLSLDARLFILKCLKVNPEERPTAAELLNHPFV              |
| AtMAPKKK9  | WQKGQLLRQGSFSGSVYEAISEDGDFFAVKEVSLDDQGSQAQECIQQLEGEIALLSLEHQNILRYRGTDKDGSNLYIFLELVTQGSLL<br>LYRRYQIRDSLISLYTKQILDGLKYLHDKGFIHRDIKCATILVDANGTVKLADFLAKVSKLNDIKSRKETLFWMAPEVINRKDNDGY<br>RSPADIWSLGTCTVLEMCTGQIPYSLEPVEALFRIRRGTLPEVDPDTLSLDARHFILKCLKLNPEERPTATELLNHPFV            |
| AtMAPKKK10 | WLKQQLLRGSYASVYEAISEDGDFFAVKEVSLDDKGIQAQECIQQLEGEIALLSLEHQNIVRYRGTAKDVSPLYIFLELVTQGSVQ<br>KLYERYQLSYTVVSLYTRQILAGLNYLHDKGFVHRDIKCANMLVDANGTVKLADFLAEASKFNNDIMSKGTLFWMAPEVINRKDS<br>DGNPADIWSLGTCTVLEMCTGQIPYSDLKPIQAQAFKIGRGTLPVDPDTLSLDARHFILKCLKVNPEERPTAAELLNHPFV              |
| AtMAPKKK11 | WQKGQLLRGSLGSVYEGISADGDFFAFKEVSLDDQGSQAHEWQVQVEGGIALLSLEHQNIVRYRGTAKDESNIYIFLELVTQGSRL<br>KLYQRNQLGDSVSVSLYTRQILDGLKYLHDKGFIHRDIKCANVLDANGTVKLADFLAKVMSLWRTPYWNWMAPEVIVLKSFLF                                                                                                     |
| AtMAPKKK12 | WRKGELIGCGAFGRVYMGMLNDSGELLAIAKQVLIAPSSASKEKTQGHIRELEEEVQLLKNLSHPNIVRYLGTVRESDSLNIEMFVPGG<br>SISLLEKFGSFPPEVIMYTKQLLGLLEYLHNNIMHRDIKGANILVDNKGICRLADFGASKVVELATVNGAKSMKGTPLYWMAPEVI<br>LQTGHFSADIWSVGTCTVIEMATGKPPWSEQYQFAAVLHIGRTKAHPPPEDLSPEAKDFLMKCLHKEPSRLSATLQHPFV           |
| AtMAPKKK13 | WVRGACIGRGCFGAVSTAISKNGEVFAVKSVDLATSPTQSELENEISVFRSLKPHYIVKFLGDGVSKEGTTTTFRNLYLELPLNGD<br>VASHRAGGKIEDETLQRYTACLVSALRHVHSQGFVHCDVKARNILVSQSSMVKLADFGSAFRIHTPRALITPRGSPLWMAPEVIRRE<br>YQGPESDVWSLGTCTIEMFTGKPAWEDHGIDSLSRISFSDELVPFPSKLEIGRDFLEKCLKRDPNQRWSCDQLLQHPFL              |
| AtMAPKKK14 | WIRGSCVGRGCFGTVSKALSKIDGGLFAVKSIDLATCLPSQAESLENEIVILRSMKSHPNIVRFLGDDVSKEGTASFRLHLEYSPEGDV<br>ANGGIVNETLLRRYVWCLVSALSHVHNGIVHCDVKSKNVLFVNGSSVKLADFGSAVEFEKSTIHVSPRGSPLWMAPEVVRREYQG<br>PESDVWSLGTCTVIEMLTGKPAWEDHGFDLSRIGFSNDLPFVGLSELGRDFLEKCLKRDRSQRWSCDQLLQHPFL                 |
| AtMAPKKK15 | WIRGPIGRGSTATVSLGITNSGDFFAVKSASFSSAFLQREQSILSKLSSPYIVKYIGSNVTKENDKLMYNLLMEYVSGGSLHDLIKNSG<br>GKLPEPLIRSYTRQILKGLMYLHDQGIHCDVKSQNVIGGEIAKIVDLGCAKTVEENENLEFSGTPAFMSPEVARGEEQSPADVWA<br>LGCTVIEMATGSSPWPELNDVVAAYIKIGFTGESPIVWVLSKQDQFLRCLRKDPKQRWTVTEELLQHPFL                      |
| AtMAPKKK16 | WTRGPIGRGSTATVSIASSGELFAVKSADLSSSLLQKESILSTLSSPHMVKYIGTGLTRESNGLVYNILMEYVSGGNLHDLIKNSG<br>GKLPEPEIRSYTRQILNGLVYLHERGIVHCDLKSHNVLEENGLVIADMGCAKSVDKSEFSGTPAFMAPEVARGEEQRPADVWAL<br>GCTMIEMMTGSSPWPELNDVVAAMYKIGFSGSPAIPAWISDKAKDFLKNCLKEDQKQRWTVTEELLKHPFL                         |
| AtMAPKKK17 | WTRGRILGRGSTATVYAAAGHNSDEILAVKSSEVHRSEFLQREAKILSSLSPYVIGYRGSETKRESNGVVMYNLLMEYAPYGTLD<br>AAKDGGRVDETRVVKYTRDILKGLYIHSKGIHCDVKGSNVVIKGEAKIADFGCAKRVDPVFESVPMGTAFMAPEVARGEKQ<br>KESDIWAVGCTMIEMVTGSPWTKADSREDPVSVLYRVGYSSETPELPCLLAAEEAKDFLEKCLKREANERWTATQLLNHPFL                  |
| AtMAPKKK18 | WTRGKTLGRGSTATVSAATCHESGETLAVKSAEFHRSEFLQREAKILSSLNSPYVIGYRGCEITREPFHNGEATTYSLLMEYAPYGT<br>TDVATKNGGFIDEARVVKYTRQILLGLEIYHNSKGIHCDIKGSNVLVGENGEAKIADFGCAKRWVEPEITEPVRGTPAFMAPEAAR<br>RQKESDIWAVGCTVIEMVTGSQPWIGADFTDPVSVLYRVGYLGELELPCSLTEQAKDFLGKCLKKEATERWTASQLLNHPFL           |
| AtMAPKKK19 | WIRGETIGYGTFTVSLATRSNNSGEPPLMAVKSADSYGAASLANEKSVDNLGDDCNEIVRCFGEDRTVENGEEMHNLFLYASR<br>GSLESYLKLAGEGVPESTVRRHTGSVLRGLRHHANGFAHCDLKLGNILFGDGAVKIADFLAKRIGDALTALNYGVQIRGTPLYMA<br>PESVNDNEYGSEGDVWALGCVVEMFSGKTAWSLKEGNSFMSLLLRIGVGDEVPMPPEELSEQGRDFLSKCFVKDPKRWTAEMLL<br>NHPFV     |
| AtMAPKKK20 | WVRGETIGYGTFTVSTATKSRNSGDFPALIAVKSSTDAYGAASLSNEKSVDLSDGDCPEIIRCYGEDSTVENGEEMHNLLEYSRGS<br>ASYMKKLGEGLEPESTVRRHTGSVLRGLRHHAKGFAHCDIKLANILLFNDGSKVIAADFLAMRVVDGDLTALRKSVEIRGTPLYMAPE<br>CVNDNEYGSAADVWALGCAVEMFSGKTAWSVKEGSHFMSLLRIGVGDELKPIPEMLSEEGKDFLSKCFVKDPAKRWTAEMLLNH<br>SFV |
| AtMAPKKK21 | WIRRETIGHGSFSTVSLATTSGSSSKAFPSLMAVKSAGVCSAALRNERDVLDDLGDCEIVRCFGEGRTEVENGEIYNLFLEYASGGS<br>LADRIKSSGEALPEFEVRRFTRSIKGLCHIHNGFTHCDIKENVLFVGDGDVKISDFGLAKRRSSEVCEIRGTPLYMAPESVNHGFE<br>ESPADIWALGCSVVMSSGKTAWCLEDGVMNVMMSLLVRIGSGDEVPRIPELSEEGKDFVSKCFVKNAERWTAEMLLDHPFL            |
| AtCTR1     | LNIKEKIGAGSFGTVHRAEWHGSDVAVKILMEQDFHAERVNEFLREVAIMKRLRHPNIVLFMGAVTQPPNLSIVTEYLSRGSYLRLH<br>KSGAREQLDERRRLSMAYDVAKGMNYLHNRNPPVHRDLKSPNLLVDKKYTVKVCDFGLSRLKASTFLSSKSAAGTPEWMAPEVLR<br>DEPSNEKSDVYSFGVILWELATLQPPWGNLNPQVVAAGVFKCKRLEIPRNLNPQVAAIIEGCVWTEPNWRKPSFATIMDLLRPLI         |
| AtEDR1     | LVAERIGLGSYGEVYHADWHGTEVAVKKFLDQDFSGAALAEFRSEVRIMRRLRHPNVVFFLGAVTRPPNLSIVTEFLPRGSYLRIHR<br>PKSHIDERRRIKMALDVAMGMNCLHTSTPTIVHRDLKTPNLLVDNWNVVKVDFGLSRLKHNTFLSSKSTAGTPEWMAPEVLRNPS<br>NEKCDVYSFGVILWELATLRLPWRGMNPMQVVGAVGQNRRLLEIPKELDPVVGRIILECWQTDPNLRPSFAQLTEVL                 |
| AtRaf3     | LQIGERIGSISYGEVYRAEWNGTEVAVKKFLDQDFSGDALTQFKSEIEMLRRLRHPNIVLFMGAVTRPPNLSIVTEFLPRGSYLRIHR<br>NHQLDEKRRMRMALDVAKGMNYLHTSHPTVHRDLKSPNLLVDKNVVKVDFGLSRMKHHTYLSKSTAGTPEWMAPEVLRNE<br>PANЕКCDVYSFGVILWELATSRVPWKGLNPMQVVGAVGQNRRLLEIPDDIDLVAQIIRECWQTEPHLRPSFTQLMQSLKRL                 |
| AtRaf4     | ITVAERIGLGSYGEVYRGDWHGTEVAVKKFIDQDITGEALEEFRSEVRIMRRLRHPNIVLFMGAVTRPPNLSIVTEFLPRGSYLRIHR<br>PNNQLDERKRLMALDAARGMNYLHSCNPVIVHRDLKSPNLLVDKNVVKVDFGLSRMKVSTYLSKSTAGTAEWMAPEVLRNE<br>PADEKCDVYSYGVILWELFTLQPPWGMNPMQVVGAVGQNRRLDIPFVDPGIADIIRKWCWQTDPNLRPSFGEIMDSL                    |
| AtRaf5     | ITVGERIGLGSYGEVYRGDWHGTEVAVKKFLDQDLTGEALEEFRSEVRIMKRLRHPNIVLFMGAVTRPPNLSIVTEFLPRGSYLRIHR<br>PNNQLDERRRLMALDAARGMNYLHSCNPMIVHRDLKSPNLLVDKNVVKVDFGLSRMKHSTYLSKSTAGTAEWMAPEVLRN<br>EPADEKCDVYSYGVILWELFTLQPPWGMNPMQVVGAVGQNRRLDIPFVDPAIADLISKWCWQTDKSLRPSFAEIMASL                    |



|         |                                                                                                                                                                                                                                                                                                         |
|---------|---------------------------------------------------------------------------------------------------------------------------------------------------------------------------------------------------------------------------------------------------------------------------------------------------------|
| AtRaf24 | LEELKELGSGTFTVYHGKWRGTDVAIKRIKRSFCIGRSSEQERLTSEFWHEAEILSKLHHPNVMAFYGVVKDGGTGLATVTEYMV<br>NGSLRHVLLSNRHLDRRKRLLIAMDAAFGMEYLHKSIVHFDLKCENLLVNLKDPARPICKVGFGLSKIKRNTLVGGVVRGTLPWM<br>APELLSGSSSKVSEKVDVFSFGIVLWEILTGEPEYANMHYGAIIIGVIVNNTLRPTVPNYCDPEWRMLMEQCWAPDPFVRPAFPEIARRL                            |
| AtRaf25 | VRKSDGISKGAYQVAKWNGTRVSVKILDKDSYSDPERINAFRHELTLLEKVRHPNVIVQFVGAVTQNPMMIVVEYNPKGDLSSVYLQK<br>KGRSPSKALRFALDIARGMNYLHECKPDIHCDLKPKNILLDRGGQLKISGFGMIRLSKISQDKAKVANHKAHIDLSNYYIAPEVYK<br>DEIFDLRVDAAHSFGVILYEITEGVVVFHPRPPEEVARMMCLEGKRPVFKTKRSYPPDIKELIEKCWHPEAGIRPTFSEIIRL                               |
| AtRaf26 | LETSNVIARGTYGTVYKGIYDGDQDVAVKVLDWEDDGNETTAKTATNRALFRQEVTVWHKLNHPNVTKFVGASMGTTNLNIRSADS<br>KGSPPQACCVVVEYLPGGTLKQHLIRHKSCKLAFKAVIKLALDLARGLSYLHSEKIVHRDVKTENMLLDQAQNLKIADFGVARVEA<br>LNPKDMTGETGTLGYMAPEVIDGKPYNRRCDVYSFGICLWEIYCCDMPYPDLFSFVDVSSAVVHLNLRPEIPRCCPTALAGIMKTCWD<br>GNPQKRPEMKEVVKML        |
| AtRaf27 | FTQSEKITKGTICMAMWRGIQVAVKLDDEVLSDDQVRKFHDELALLQRLRHPNIVQFLGAVTQSNPMMIVTEYLPRGDLRELLK<br>RKGQLKPATAVRYALDIARGMSYLHEIKGDIHHRDLKSNILRDDSGLKLVADFGVSKLVTVKEDKPFQDISCRYIAPEVFTSEEDY<br>TKADVFSFALIVQEMIEGRMPFAEKEDSEASEAYAGKHRPLFKAPSKNYPHGLKTLIEECWHEKPAKRPTFREIIRL                                         |
| AtRaf28 | LHMGPFAQAGFKLYRGTYNEDVAIKLLERSDSNPEKAQALEQQFQVEVSMLAFLKHPNIVRFIGACIKPMVWCIVTEYAKGGSV<br>RQFLTKRQNRVPLKLAVMQALDVARGMAYVHERNFHHRDLKSDNLLISADRSIKIADFGVARIEVQTEGMPETGTYRWMAPEMIQ<br>HRPYTQKVDVYSFGIVLWELITGLLPFQNMATAVQAFAVVRNRGVRPTVPADCLPVLGEIMTRCWDADPEVRPCFAEIVNLL                                     |
| AtRaf29 | LKIEKKVACGSYGELFRGTYSQEVAIKILKPERVNAEMLEFSQEVYIMRKRHKNVQVFIGACTRSPNLCIVTEFMTRGSIYDFLHK<br>HKGVFKIQSLKVALDVSKGMNYLHQNNIHRDLKTANLLMDEHEVVKVADFGVARVQTESGVMTAETGTYRWMAPEVIEHKPYD<br>HRADVFSYAIVLWELLTGELPYSYLTPLQAAVGVVQKGLRPKIPKETHPKLTELLEKWCQDPAALRPNFAEIIEML                                           |
| AtRaf30 | LKFGHKIASGSYGDLYKGTYSQEVAIKVLKPERLSDLEKEFAQEVFIMRKRHKNVQVFIGACTKPHLCIVTEFMPGGSVYDYHLH<br>KQKGVFKLPTLFKVAIDICKGMSYLHQNNIHRDLKAAANLLMDENEVVKVADFGVARVKAQTGVMATAETGTYRWMAPEVIEHKPY<br>DHKADVFSYGIVLWELLTGKLPYEYMTPLQAAVGVVQKGLRPTIPKNTHPKLAELLERLWEHDSTQRPDFSEIIEQL                                        |
| AtRaf31 | LFIGSKIGEGAHGKVVYQGRYGRQIVAIKVVNRGSKPDQSSLESRFVREVNMSRVQHHLNPKVFIGACKDPLMVIVTELLPGMSLRK<br>YLTSLRQQLHLPLALSFALDIARALHCLHANGIHRDLKPDNLLL TENHKSVKLADFGFLAREESVTEMMTAETGTYRWMAPELYSTV<br>TLRQGEKKHYNNKVDVYSFGIVLWELLTNRMPFEGMSNLQAAAYAAAFKQERPVMPEGISPLAFIVQSCWVEDPNMRPFSFSQIIRLLN<br>EFL                 |
| AtRaf32 | LFVGPKIGEGAHAKIYEGKYKNTVAIKIVKRGESPEEIAKRESRFAREVSMLSRVQHKNLVKFIGACKEPIMVIVTELLGGTLRKYL<br>VSLRPGSLDIRVAVGYALDIARAMECLHSHGVIHRDLKPESLILTADYKTVKLADFGFLAREESLTEMMTAETGTYRWMAPELYSTVT<br>LRHGEEKHYNHKVDAYSFAIVLWELIHNKLPFEGMSNLQAAAYAAAFKNVRPSADDLPKDLAMIVTSCWKEDPNDRPNFTIIMLLR<br>CL                     |
| AtRaf33 | LIKTVLARGTFTVHRGIYDGDQDVAVKLLDWGEEGHRSEAEIVSLRADFAQEVAVWHKLDHPNVTKFIGATMGASGLQLQTESGPL<br>AMPNNICCVVVEYLPGGALKSYLIKNNRRRKLTFKIVVQLALDLARGLSYLHSHQKIVHRDVKTENMLLDKTRTVKIADFGVARVEASN<br>PNDMTGETGTLGYMAPEVLNGPNYRKCVDVYSFGICLWEIYCCDMPYPDLTFSEVTSVAVRQNLRPDIPRCCPSALAAVMKRCWDA<br>NPKRPEMDEVVPM          |
| AtRaf34 | LFVGPKIGEGAHAKVYEGKYKNTVAIKIVHRGETPEEIAKRDSRFLREVEMLSRVQHKNLVKFIGACKEPIMVIVTELLQGGLTRKY<br>LLNLRPACLETRVAIGFALDIARGMECLHSHGIIHRDLKPENLLL TADHKTVKLADFGFLAREESLTEMMTAETGTYRWMAPELYSTVT<br>LRLGEEKHYNHKVDAYSFAIVLWELLHNKLPFEGMSNLQAAAYAAAFKNVRPSAESLPEELGDIVTSCWNEDPNARPNFTIIEILL                         |
| AtRaf35 | LEEIRELGHGTYGSVYHGKWKGSVVAIKRIKASCFAKPSERERLIEDFWKEALLSSLHHPNVVSFYGIVRDPDGLSATVAEFMVN<br>GSLKQFLQKDRITDRRKRLLIAMDTAFGMEYLHGKNIVHFDLKCENLLVNMRRDPQRICKIGDLGSKVKQKTLVSGGVRGTLPWM<br>APELLSGKSNMVSEKIDVYSFGIVMWELLTGEPEYADMHCASIIGVIVNNTLRPKIPQWCDPEWKGLMESCWTSEPTERPSFTEISQKL                             |
| AtRaf36 | LFVGLKFAHGLYSRLYHGKYEDKAVAVKLITVPPDDDNGLGARLEKQFTKEVTLSSLRTHPNVIVKQFVGAQYKDPVYCVLTQYLP<br>SLRSLFLKHPENRSLPKLIEFAIDIARGMEYIHSRIIHRDLKPNVLIIDEFHLKIADFGIACEEYCDMLADDPGTYRWMAPEMIKRR<br>PHGRKADVYSFGLVWEMVAGAIPYEDMNPQAFAVVKHKNIRPAIPGDCPVAMKALIEQCWSVAPDKRPEFWQIVKVL                                      |
| AtRaf37 | ISIGDFIGESSSTVYRGLFRVVPVSVKIFQPKRTSALSIEQRKQFQREVLLSKFRHENIVRFIGACIEPKLMIITELMEGNTLQKFMLS<br>VRPKPLDLKLSISFALDIARGMEFLNANGIHRDLKPSNMLLTGDQKHVKLADFGFLAREETKGFMTFEAGTYRWMAPELFSYDTLEIG<br>EKKHYDHKVDVYSFAIVFWELLTNKTPFKGKNNIFVAYAASKNQRPSVENLPEGVVSILQSCWAENPDARPEFKEITYSLTNLLRSL                        |
| AtRaf38 | LIKSVIARGTFTVHRGIYDGDQDVAVKLLDWGEEGHRSDAEIASLRAAFTQEVAVWHKLDHPNVTKFIGAAMGTSEMSIQTENGQM<br>GMPNSVCCVVVEYCPGGALKSFLIKTRRRKLAFAKVVVQLALDLARGLSYLHSHQKIVHRDVKTENMLLDKSRTLKIADFGVARLEASN<br>NDMTGETGTLGYMAPEVLNGSPYRKCVDVYSFGICLWEIYCCDMPYPDLFSFVTSVAVRQNLRPDIPRCCPSLANVMKRCWDANP<br>EKREPEMEEVAML           |
| AtRaf39 | LEMNRVIARGAYGIVYKGIYDGDQDVAVKVLDWGEDGYATTAETSALRASFRQEVAVWHKLDHPNVTRFVGASMGTTANLKIPSSAET<br>ENSLPQRACCVVVEYIPGGTLKQYLFNRNRKLAFAKVVVQLALDLARGLSYLHSHSERIVHRDVKTENMLLDYQRNLKIADFGVARVEA<br>QNPKDMTGETGTLGYMAPEVLGKPYNRRCDVYSFGICLWEIYCCDMPYPDLFSFADVSSAVVVRQNLRPDIPRCCPTALATIMKRCWE<br>ANPEKRPEMEEVVSLEAV |
| AtRaf40 | LEDLTELGSYGTVYHGTWRGTDVAIKRIRNSCFAGRSSEQERLTKDFWREAQILSNLHHPNVVAFYGIVPDGTGGTGLATVTEFMV<br>NGSLRHALLKDRLLDTRKIIIAMDAAFGMEYLHSKNIVHFDLKCENLLVNLDRPQRICKVGDGLSRIKRNLTVSGGVRGTLPWM<br>APELLNGSSTRVSEKVDVFSYGISLWEILTGEPEYADMHCAGAIIGVIVNNTLRPPPIKSCSPEWKKLMEQCWSVDPDRPPFTEITCRL                             |
| AtRaf41 | LFVGPKIGEGAHAKVYEGKYRNTVAIKIIRKGESPEEIAKRDNRFAREIAMSQVQHKNLVKFIGACKEPMMVIVTELLGGTLRKY                                                                                                                                                                                                                   |

LVSLRPKRLDIRLAVGFALDIARAMECLHSHGIIHRDLKPENLILSADHKTIVKLADFLAREESLTEMMTAETGTYRWMAPELYSTVT  
LRQGEKKHYNHKVDAYSFVAVLWELILNKLPFEGMSNLQAAAYAAAFKNLRPSAEDLPGDLEMIVTSCWKEDPNERPNFTEIIQMLLRY  
L

AtRaf42 LEELRELGSFTGTVYHGKWRGTDVAIKRINDRCFAGKPSEQERMIDDFWNEAQNLAGLHHPNVVAFYGVVLDSPGGSVATVTEYM  
VNGSLRNALQKNVRNDRCKRQLIAMDIAFGMEYLHGKIVHFDLKSDNLLVNLDRPHRICKVGDGLSKVKCQTLISGGVGRGTL  
WMAPELLNGTSSLVSEKVDVFSFGIVLWELFTGEEPYADLHYGAIIGVIVSNLTPRQIPDFCDMDWKLMLERCWSAEPSEPSFTEIVN  
EL

AtRaf43 LSYGDRFAHGKYSQIYHGEYEGKAVALKIITAPEDSDDIFLGARLEKEFIVEATLLSRLSHPNVVKFVGVNTGNCIITEYVPRGSLRSYL  
HKLEQKSLPLEQLIDFGLDIAGKMEYIHSREIVHQDLKPEENVLIDNDFHLKIADFGIACEEYCDVLDGNIGTYRWMAPEVLKRIPHGR  
KCDVYSFGLLLWEMVAGALPYEEMKFAEQIAYAVIYKIRPVIPTDCAAMKELIERCWSSQTDKRPEFWQIVKVL

AtRaf44 IMRGEMIGEGNSIVYKGRKKNIVPVAVKIVQPGKTSAVSIQDKQQFQKEVLSMCKHENIVRFVACIEPQLMIVTELVRGGTLQRF  
MLNSRPSPLDLKVSLSFALDISRAMEYLHSGKIIHRDLNPRNVLTGDMKHVKLADFLAREKTLGGMTCEAGTYRWMAPEVCSREP  
LRIGEKHYDQKIDVYSFALIFWLLTNKTPFSEIPSISIPYFVNQGKRPSLSNIPDEVVPILECCWAADSKTRLEFKDITISL

AtRaf45 VVVGEMIGEGAYSIVYKGLLRNQFPVAVKIMDPSTTSAVTKAHKKTQKEVLLSKMKHDNIVKVFVACIEPQLIIVTELVEGGTLQR  
FMHSRPGPLDLKMSLSFALDISRAMEYVHNSGIIHRDLNPRNLLVTGDLKHVKLADFGIAREETRGGMTCEAGTSKWMapevyspepl  
RVGEKKEYDHKADIYSFAIVLWQLVTNEEFPDVPNSLFPYLVSQGRRPILTKTPDVFPVIVESCWAQDPDARPEFKEISVML

AtRaf46 VRKVDGISKGTQYVAKWNGTRVSVKIFDKDSYSDPERVNAFTNELTLAKARHPNIVQFVGAVTQNLPMIVVECNPKGDLVSVYQ  
KKGRSPSKALRFALDIARGMNYLHECKPDPIIHCELMKPNILLDRGGQLKISGFLIKLSKIGEDSAKVVNHEAQIDKSNYYIAPEIYK  
DEVFDRADVHSGVILYELTEGVSLFHPKPEEVAESICIEGKRPTIRTKSKSYPELKELEECWHPEISVRPIFSEIIRL

AtRaf47 FSNVSKISGTFNKASWRGIDVAVKTFGEEMFTDEDKVNFRDELALLQKIRHPNVVQFLGAVTQSTPMIVTEYLPGDLRQYLDL  
KGPLMPAHAVKFALEIARGMNYLHEHKPEAIHCDLEPPNLRDSDGHLKVADFGVSKLLVVKKTVKKDRPVVTCLDSSWRVMAPEV  
YRNEEYDTKVDVFSFALILQEMIEGCEPFHEIEDREVPKAYIEDERPPFNAPTKSYPFGLQELIQDCWDKEASKRPTFRVIISTLELI

AtRaf48 LDMKHVLAHGTYGTVYRGVYAGQEVAVKVLWDWGEDYATPAETALRASFEQEVAVWQKLDHPNVTKFISMGTSDLRIPPAGD  
TGGRNGAHPARACCVVEYVAGGTLKKFLIKYRAKLPKDVQLALDLARGLSYLHSAIVHRDVKSENMLLQPNKTLKIADFGV  
ARVEAQNPDMTGETGTLYMAPEVLEGGKPYNRKCDVYSFGVCLWEIYCCDMPYADCSFAEISHAVVHRNLRPEIPKCCPHAVANI  
MKRCWDPNDRPEMEEVVKLEAI

AtZIK1 GRFREVLGKGMKTVYKAFDQVLGMEVAWNQVQLNEVFRSPEPLQRLYSEVHLLKLNHNESIIRYCTSWIDVNRRTFNITELFTSGT  
LREYRKYQKVDIRAIKSWARQILNGLAYLHGHDPPVIHRDLKCDNIFVNGHLGQVKIGDLGLAAILRGSQNAHSVIGTPEFMAPELY  
EEDYNELVDIYSFGMCMLEMLTGEYYPYSECTNPAQIYKVTSGKLPDSFHILQHTEAQRFVKGKLETVSRRLPAKELLADPFL

AtZIK2 GRFAEILGRGAMKTVYKAIDEKLGIEVAWSQVQLKEVLRSSVDLQRLYSEVHLLSTLNHKSIIHFYTSWIDVHNHTLNFITELFTSGTLR  
QYKNKYLRIDIRAIKSWARQILEGLVYLHEHDPPIHRDLKCDNIFVNGHLGQVKIGDLGLARMLRDCHSAHSIIGTPEFMAPELYEEN  
YNELIDVYSFGMCMLEMITSEFPYSECNHPAQIYKVVGGKLPGAFYRVGDIEAQRFIGKCLVSASKRVSARELLQDPFL

AtZIK3 GRYDEILGKGASKTVYRAFDEYEGIEVAWNQVQLRNFRNPEELEKFFREIHLKTLNHNQIMKFYTSWVDTNNSINFVTELFSTSGTL  
RQYRLRHRVNIRAVKQWCKQLKGLLYLHRSRPIHRDLKCDNIFVNGHGEVKIGDLGLAAILRKSASHVRCVGTPEFMAPEVYDEE  
YNELVDVYAFGMCVLEMLVTFDYPYSECTHPAQIYKVKVTSGKKEAFYLVKDPEVREFVEKCLANVTCLTALELLQDPFL

AtZIK4 GRYNEVLGKGASKTVYRAFDEYEGIEVAWNQVQLYDFLQSPEDLERLYCEIHLKTLKHNIMKFYTSWVDTANRNINFTVTELFSTSG  
TLRQYRLRHRVNIRAMKHWCRQILRGLHYLHSHDPPVIHRDLKCDNIFVNGHGEVKIGDLGLAAILRKSASHVRCVGTPEFMAPEV  
YEEAYNELVDIYSFGMCMLEMLVTFDYPYSECTHPAQIYKVKVMSGKPDALYKVKDPEVKCFIEKCLATVSLRVSARELLDPPFL

AtZIK5 IRYKEVIGKGAFKTVYKAFDEVDGIEVAWNQVRIDDVLQSPNCLERLYSEVRLKSLKHNNIIRFYNSWIDDKNKTVNIITELFTSGSLR  
HYRKKHRKVNMAKVNWARQILMGLRYLHGQEPPIHRDLKCDNIFVNGHGEVKIGDLGLATVMEQANAKSVIGTPEFMAPELYD  
ENYNELADIYSFGMCMLEMLVTFDYPYCECKNSAQIYKVVSSGKIPASLRVKDPEVKCFIEKCLLPASERLSARELLDPPFL

AtZIK6 IRYDDVLGRGAFKTVYKAFDEVDGIEVAWNLVSIEDVMQMPGQLERLYSEVHLLKALKHENIIFLYSWVDEKNKTNMITEFTSGS  
LRVYRKKHRKVDPAKINWARQILKGLNYLHNSQNPVIHRDLKCDNIFVNGNTGEVKIGDLGLATVQQPTARSVIGTPEFMAPELYE  
EENYNELVDIYSFGMCMLEMLVTFDYPYNECRNQAQIYKVKVTSNIKPSLQKVDPPQVRQFIEKCLLPASSRPTALELSDPFL

AtZIK7 TQLVDIFGFGFDEVDGIEVAWNQVRIDDLLQSPDCLERLYSEVRLKSLKHNNIIRFYNSWIDDKNKTVNIITELFTSGSLRQYRKKHR  
KVNMAKVKWARQILTGLKYLHSDPPIHRDLKCDNIFVNGHGEVKIGDLGLATVMEQANAKSVIGTPEFMAPELYDENYNELADI  
YSFGMCMLEMLVTFEYYPYCECRNSAQIYKVKVSSGKIPASLKVVDPEVMKCFIEKCLLPASERLSARELLDPSFL

AtZIK8 GRYGELLGSGAVKVVYRAFDEQEEGIEVAWNQVQLRCSDDPAMTERLYSEVRLKLNKNSNIITLYKVVWRDERNNTLNFITEICTSGN  
LREYRKKHRKVMRALKKWSKQILKGLDYLHSHDPPVIHRDLNCSNIFVNGNIGQVKIGDLGLAAIVGKNHLAHSILGTPEFMAPELY  
EENYTEMVDIYSFGMCMLEMLVTFDYPYRECRNQAQIYKVKVTSNIKPSLQKVDPPQVRQFIEKCLLPASSRPTALELSDPFL

AtZIK9 MKFYASWVDTNRNINFTVTEFTSGTLRQYRLKHKRVNIRAVKNWCRQILRGLNYLHSHDPPVIHRDLKCDNIFVNGHGEVKIGDL  
GLAACLQHSHAHCVGTPEFMAPEVYKEEYNQLVDIYSFGMCMLEMLVTFDYPYSECSHPAQIYKRVISGKPPDGLDKVKDPEVRGFI  
EKCLATVSLRLSARELLDDH

AtZIK10 IRYNDVLGRGAFKTVYKAFDEVEGIEVAWNLMSIEDVLQMPGQLDRLYSEVHLLNSLKHDNIIKLFYSWVDDHNKSINMITEFTSGS  
LTLYRKKHRKVDPAKIMNWARQILKGLHYLHSHDPPVIHRDLKCDNIFVNGNTGKVKIGDLGLAAVMQPTARSVIGTPEFMAPELY  
EEEYNELVDIYSFGMCMLEMLVTFDYPYRECRNQAQIYKVKVTSNIKPSLQKVDPPQVRQFIEKCLLPASSRPTALELSDPFL

AtZIK11 GRYKEVLGKGAFKEVYRAFDEQLEGIEVAWNQVQLDDKFCSSDLDRLYSEVHLLKTLKHSIIKFYTSWIDHQMHTINLITEVFTSGN  
LRQYRKKHKCVDLRALKKWSRQILEGLVYLHSHDPPVIHRDLKCDNIFVNGHGEVKIGDLGLAAILHRARSASHVIGTPEFMAPELY

EEDYNVLVDIYAFGMCLLELVTFEYYPYSECTNAAQIYRKVTSGIKPAALLNVTDQPVRAFIEKCIKAVSQRLSAKELLEDDPFL

|            |                                                                                                                                                                                                                                                                                       |
|------------|---------------------------------------------------------------------------------------------------------------------------------------------------------------------------------------------------------------------------------------------------------------------------------------|
| BdMAPKKK1  | YMLGDEIGKGAYGRVYKGLDLENGDFVAIKQVSLNIPQEDLNIMQEIDLLKNLNHNKIVKYLGSLKTKSHLHILEYVENGLANIHK<br>PNKFGPFPELAAVYIAQVLEGLVYLHEQGVVIHRDIKGANILTTKEGLVKLADFGVATKLEADVNTHSVVGTPYWMMAPEVIEMSGV<br>CAASDIWSVGCTVIELLTCVPPYELQMPALFRIVQDVQPPPEGFSPINDFLRQCFCQKDAIQRPDAKTLLMHPWL                      |
| BdMAPKKK2  | LEELRELGSGTFTGTVYHGKWRGSDVAIKRIKKSCTGRSSELERLANEFWREAEILSKLHHPNVVAFYGVVKGDPGGTLATVTEFMV<br>NGSLRHVLQRNKNLDRRKRLLIAMDAAFGLEYLHSHKNIVHFDLKCNDLLVNLKQSRPICKVGDGFLSKIKRNTLVSGGVRGTLPWM<br>APELLNGGSNKVSEKVDVFSFGIVMWELTGEEPYANMHYGAIIGGIVNNTLRPHVPASCDPEWRRLMEQCWAPDPAQRPAFTEIAGR<br>L    |
| BdMAPKKK3  | LEEIRELGSGTYGAVFHGKWRGCDVAIKRIKASCFAGRPSERERLIADFWKEAQILSSLHHPNVVSFYGVVVDGPDGSLATVTEFMING<br>SLKQFLRKKDRITDRRKRVLAMDAAFGMEYLHGKNIVHFDLKCENLLVNMRDPQRPICKIGDLGLSKVKQHTLVSGGVRGTLPWM<br>APELLSGKSNMVSVDKIDVYSFGIVMWELTGDEPYSDMRAAEIIGGIVNNSLRQPISWCDPEWKSLEMEGSWAGEPAERPSFTEISQRL       |
| BdMAPKKK4  | LEELRELGSGTFTGTVYHGKWRGSDVAIKRINDRCFAGKASEEQRMKTDWFNEARKLASLHHPNVVAFYGVVLDGPGGSVATVTEY<br>MANGSLRQALQRHDKIFDRRRLVIVMDVAFGMEYLHGKNIVHFDLKCNDLLVNLDRDPQRPICKVGDGFLSKVKCQTLISGGVRGTL<br>PWMAPELLNGSSSLVSEKVDVFSFGIVMWELTGEEPYADLHYGAIIGGIVNNTLRPEVPESCDPQWRSLMEQCWSAEPSEPSFTEV<br>VKRL   |
| BdMAPKKK5  | IAIGERIGLSFGGEVYRGEWHGTEVAVKKFLQDQDISSDALDEFRAEVRIMKRLRHPNVVLFMGAITRPNLSIVTEFLPRGSLFRLIHRP<br>NNQLDEKRRRLMALDVARGMNYLHNCTPVIVHRDLKSPNLLVDKNWVVKVCDGFLSRMKNNTFLSSRSTAGTAEWMAPEVLRNEP<br>SDEKCDVFSYGVLWELCTLQPWEGMNAMQVVGAVGFQSRRLDIPDNTDPAVAEIIQCWQTDPRKRPSFADIMAAL                    |
| BdMAPKKK6  | VIGERIGLSYGEVYRADWNGTEVAVKKFLDQDFYGDALDEFRSEVRIMRRLRHPNIVLFMGAITRPNLSIVSEYLRGSLYKILHRP<br>SCQIDEKRRIKMAIDVAKGMNCLHTSVPTIVHRDLKSPNLLVDNNWTVKVCDFGLSRLKHSTFLSSKSTAGTPEWMAPEVLRNEQSN<br>EKCDVYSFGVILWELATLRMPWSGMNPMQVVGAVGFQDRRLDIPKEVDPLVARIIEWECWQKDPNLRPSFAQLTSAL                    |
| BdMAPKKK7  | ITLGERVGLSGFGEVYRGEWHGTEVAVKKFLQDQDISSDILEELKAEVRIMKRLRHPNVVLFMGAITRPNLSIVTEFLPRGSLFRLIHRP<br>NNQLDERKRIRMALDVARGMNYLHNCTPVVHRDLKSPNLLVDKNWVVKVCDGFLSRIKHSTFLSSRSTAGTAEWMAPEVLRNEPS<br>DEKCDVFSYGVLWELCTLQPWEGMNAMQVVGAVGFQDRRLDIPADVDPAVAEIIQRCWQTDPKMRPSFSEIMAAL                    |
| BdMAPKKK8  | WKKGKLIGRGTFGHVYVGFNSDSGEMCAMKEVTLFDDSKSKESAKQLGQEISLSRLQHPNIVRYGSETVDDKLYIYLEYVSGGSI<br>HKLLQEYQGLGEPAMRSYTQILSGLAYLHAKNTVHRDIKGANILVDPGRVKLADFGMAKHINGHCQPFSEKSPYWMMAPEVIKSS<br>NGGCNLAVDIWSLGTVLEMATSKPPWSQYEGIAAMFKIGNSKELPPIDHLSQEGKDFIRKCLQRDPSQRPTAMELLQHPFI                   |
| BdMAPKKK9  | LEELQELGSGTFTGTVYHGKWRGSDVAIKRINDRCFAGKPSQEKMNRDFWNEASNLADLHHPNVVAFYGVVLDGPGGSIAITVTEYM<br>VNGSLRTALLKNAKSLDRRKRLLIAMDTAFGMEYLHNKNIVHFDLKCNDLLVNLDRDPQRPICKVGDGFLSKVKCQTLISGGVRGTL<br>PWMAPELLNGSSSLVSEKVDVFSFGIVLWELTGEEPYADLHYGVIIGGIVSNTLRPPVPDSCDLEWKSLEMEQCWATEPSEPSFTQIAV<br>RL |
| BdMAPKKK10 | LTIGTRVIGIFFGEVFRGIWNGTDVAIKVFLEQDLTTENMEDFCNEIYLSRLRHPNVILFLGACMVPHLSMVTEYMEMGSLYYLIHM<br>SGQKKLSWRRRLKIIRDICRGLMCIHRMKIVHRDLKSANCLVNKHWTVKICDFGLSRAMTDSPTMDNSSAGTPEWMAPELIRNEPFS<br>EKCDIFSLGVIMWELCTLSRPWDGISPQVYVAVANEGSRLEIPEGLGKLIADCWAEPQDRPSCQEILTRL                          |
| BdMAPKKK11 | WKKGKLIGHGTFGHVYVGFNSDRGEMCAMKEVTLFSDPKSKESARQLGQEILVLSRLQHPNIVRYGSETVDNKLIIYLEYVSGGS<br>IHKLLQEYGRFGEQAIRSYTKQIRLGLAYLHAKNTVHRDIKGANILVDPNGRVKADFGMAKHINGHCQPFSEKSPYWMMAPEVIKNS<br>TGCNLAVDVWSLGTVLEMATSKPPWSQYEGIAAMFKIGNSKELPPIDHLSQEGKDFIRQCLQRDPSRPTAVDLLQHSFI                   |
| BdMAPKKK12 | LVIDERIGISYGEVYHADWNGTEVAVKKFLDQEFYGDALDEFRCEVRIMRRLRHPNIVLFMGAITRPPHLSIVSEYLRGSLYKIIHR<br>PNCQIDEKRRIRMALDVARGMNYLHNCTPVIVHRDLKSPNLLVDDNWTVKVCDGFLSRLKHSTFLSSRSTAGTPEWMAPEVLRNEQS<br>NEKCDIYSFGVILWELATLRKPWQGMNQMVVGAVGFQDRRLDIPKEVDPIVASIIRDCWQKDPNLRPSFSQLSYSL                    |
| BdMAPKKK13 | ITVGTTRVIGIFFGEVFRGVWNGTDVAIKVFLEQDLTMENMEDFCNEIYLSRLRHPNVILFLGACMKPPHLSLVTEYMEMGSLYYLIHT<br>SGNKGLSWRRRLKMLRDIKRCGLMCMHRLKIVHRDLKSANCLVNKYWTVKLDFGLSRVMLDSAMRDNSSAGTPEWMAPELIRNE<br>PFTEKCDIFSLGVIMWELCTLSRPWAGKPPVQVYVAVANEGARLEIPDGPLRSLISDCWAEPDKRPSQCEILTRL                      |
| BdMAPKKK14 | LQIGERIGLSYGEVYHADWNGTEVAVKKFLDQDLSGVALEQFKCEVRIMSRLRHPNVVLFGLGYVTQPPNLSILTEYLRGSLFRLLH<br>RPNSKVDETRRLKMLALDVARGMNYLHASHPTIVHRDLKSPNLLVDKNWVVKVSDFGMSRLKHHTFLSSKSTAGTPEWMAPEVLRN<br>EPANEMCDVYSFGVILWELATMRVPWSGLNPMQVVGAVGFQNRRLDIPKEVDPPVASIILSCWDNDPSKRPSFSQLSPL                  |
| BdMAPKKK15 | LVIGEQQVQSGCTVYHALWYGSVDGVKVFQRQEYSEEVIQAFRQEVSLMKKLRHPNILLFMGAITSPHRLCIVTEFLPRGSLFRLLQ<br>RSTTKLDWRRRVHMLALDVARGMNYLHHSYSPPIIHRDLKSNLLVDKNWTVKVAADFGLSRLKRETYLTTKTGKTPQWMAPEVLRN<br>EPSDEKSDVYSYGVLWELVTQKIPWENLNSMQVIGAVGFMNQRLEIPSETDPYWTSLILSCWETDPQSRPSFQELLEKL                  |
| BdMAPKKK16 | GRYNDVLGKGASKTVYRAFDEYQGMVAWNQVKLHDFLQSPEDLERLYCEIHLKTLKHRNIMKFYTSWVDVSGRNINITEMFTS<br>GTLRQYRQRHRKVNIAVVKHWCRQLSGLLYLHSHDPIIHRDLKCNIFVNGNQGEVKIGDLGLAAILRKSASHVCVGTPEFMAPE<br>VYEEYNELVDIYSFGMCVLEMTFEYYPYSECTHPVQIYKQVISGKPEALYKVKDPMVRQFVEKCLTTASRRLPARELLNDP                      |
| BdMAPKKK17 | LVLKEKIGAGSFGTVHRADWNGSDVAVKILMEQDYHLDRFREFMREVAIMKSLRHPNIVLFMGAITPEPPNLSIVTEYLSRGSLYKLLH<br>RSGAREVLDERRRLNMAFDVAKGMNYLHRRSPPIVHRDLKSPNLLVDKKYTVKVCDFGLSRLKANTFLSSKSLAGTPEWMAPEVLR<br>DEPSNEKSDVYSFAVILWELMTLQPPWCNLPQVVAAGVFKGRRLIPEKDLNPQVAALIESCWANEPWRRPSFANIMETL                |
| BdMAPKKK18 | LAVREKIGAGSFGTVHRADWNGSDVAVKILMDQDLHPERLKEFLREVAIMKSLRHPNIVLLMGAITQPPNLSIVTEYLSRGNLYRLLH<br>RHGARENLDERRRLSMAFDVAKGMNYLHKNRNPPIVHRDLKSPNLLVDKKYTVKVCDFGLSRLKANTFLSSKTAAGTPEWMAPEVLR                                                                                                   |

DEPSNEKSDVYSFAVILWELMTLQQPWSNLNPAQVVAAVGFRGRRPEIPSSVDPKVAIIESCWAKEPWRRPSFTSIMESL

|            |                                                                                                                                                                                                                                                                                  |
|------------|----------------------------------------------------------------------------------------------------------------------------------------------------------------------------------------------------------------------------------------------------------------------------------|
| BdMAPKKK19 | WQKRKLIGSGTYGCVYEATNRHTGALCAMKEVNIIPDDAKSVESMKQLDQEIKFLSQFKHENIVQYYGSETIDDRFYIYLEYVHPGSI<br>NKYINQHCAMTESVVRNFRTRHILKGLAFLHSQKIMHRDIKGANLLVDVNGVVKLADFGMAKHLSTAAPNLSLKGTPYWMapevV<br>QATLVKDVGYDLAVDIWSLGTIEMFTGKPPWSGLEGAAMFKVLNKDPSVPDNLSPGKDFLRGCFKRNPSERPTASKLLEHPFV         |
| BdMAPKKK20 | LELKERVAGSFGTVHRADWHGSDVAVKVLTDQDVGEAQLKEFLREISIMKRVRHPNVVLFMGAVTKCPHLSIVTEYLPRGSLFRLI<br>NKAAGGEMLDLRRRLRMALDVAKGINYLHCLNPPIVHWDLKTPNMLVDKNWSVKVGDVGLSRFKATTFISSKSVAGTPEWMAPEFL<br>RGEPNEKCDVYSFGVILWELVTMQPWSGLGPAQVVGAVAFQNRRLPIPKDTIPELAALVESCWDDDPQRPSFSSIVDTL              |
| BdMAPKKK21 | LNFGNKVASGSYGDLRYGTYSQDVAIKVLKPERVNADMQRFAQEVYIMRKVRHKNVVQFIGACTKPPRLCIVTEYMSGGSVYDY<br>LHKHKGVFKLPALVGVAVDVSKGMSYLHQNIIHRDLKTANLLMDENGVMKVADFGVARVKVQSGVMTAETGTYRWMAPEVIEH<br>KPYDHKADVFSFGILMWELLTGKIPYEYLTPLQAAVGVVQKGLRPTVPKNAHAKLGELLQKCWQQDPTQRPDFSEILETL                  |
| BdMAPKKK22 | LRFYRQSYKAFDQLEGLEVAWNQIKVGDILRNDDLERLRSEVRLKTLKHKNVIKFNWSWLDKKNNNINFITEVFTSGTLRQYRIKH<br>KKVDIRALKKWSRQILSGLVYLHSHDPPHHRDLKCNIFVNGNQGEVKIGDLGLATILDNARSASHSIIGTPEFMAPELYDEEYNELVDI<br>YAFGMCLLELVTFEYPCESNAAIQYKVKVSDGEKPGSLAKIEDPEVKFIEKICITQASQRLSAEELLVDPF                   |
| BdMAPKKK23 | WRKGEMIGSGAFGQVYLGMDLDTGELLA VKQVLIGSSNATREKAQAHIRELEEEVKLLKNLSHPNIVRYLGTVREEDTLNILLEFVPG<br>GSIQSLGKLGSPFEAVIRKYTKQILQGLEYLHNNAIHRDIKGANILVDNKGCIKLADFGASKQVAKLATMTAAKTMKGTTPHWMape<br>VIVGSGHTFSADIWSVGCTVIEMATGKPPWSQQYQEVALLFHVGTTSKSHPIPEHISPEAKDFLLKCLQKEPELRSTASDLLKHPFV  |
| BdMAPKKK24 | LEDLREMGSGAFGTVFHKGWRGTDVAIKRIKNSCFSHSPSSQADKLITFEWREAAIISKLHHPNIALYGVKNGPGGTLGTVTEFMVNG<br>SLKKVLSRKDKYLDWRKRILVAMDAIIGMEYLHSDIVHFDLKCDNLLVNIKDPSRPICKVADFGLSKMKQATLVSGGMRGTLPWM<br>APELLTMSGTKVSEKVDVYSFGVVMWELLTGEDPYDGMHYGGVIGILSNTLRPPVPTSCKPEWRKLEMCQWSTEPGRRPSFEVAT<br>GL |
| BdMAPKKK25 | WRKGDIGSGAFGQVYLGMDLDSGELLA VKQVLIGSSNSTRDKAQAHIREELEEVKLLKNLSHNLNIVRYIGTVREEDSLNILLEFVPG<br>GSIQSLGRLGAFPEPVIRKYTKQILHGLEYLHRNIIHRDIKGANILVDNKGCIKLADFGASKQVEKLATAAKTMKGTTPYWMapeVIV<br>GSGHDFSADIWSVGCTVIEMATGKTPWNQEIQEVSLLYVGTTSKSHPIPEHLSPEAKDFLLKCLQKEPELRSSASNLLQHPFV     |
| BdMAPKKK26 | WQKGKLLSGTFCVYEATNRNTGALCAMKEVNIIPDDAKSAESLKLEQEIKFLSQFKHENIVQYYGSDTIEDRFYIYLEYVHPGSI<br>KYVKQHYGAITESVVRNFRTRHILRGLAFLHGQKIMHRDIKGANLLVDINGVVKLADFGMATHLSTAAPNLSLKGTPYWMapeMVQA<br>TLKSDVGYDLAVDIWSLGTIEMFDGKPPWSGLEGAAMFKVLHKDPPHENLSHEGQDFLQCCFKRNSAERPAIIELDHPFI             |
| BdMAPKKK27 | WKGKLLSGTFCVYLFNSEGGMCAIIEVKVIADDSNSKECLRQLNQEMLLLNQLSHPNIVQYYGSELSSETLSVYLEFVSGGSI<br>HKLLQEYGPFGTFLRNYTAQILSGLAYLHGRNTVHRDIKGANILVDPNGDIKLADFGMAKHISAYTSIKSFKGSPYWMapeVIMNTN<br>GYSLSVDIWSLGTILEMATARPPWSQYEGVAAIFKIGNSKDIPDVPDHLSEAKSFLKCLQRDPAARPTAAQLIDHPVW                 |
| BdMAPKKK28 | MRYNEVLGRGAFKTVYKAFDEVEGIEVAWNQVNIDEVMQCPDNLERLYSEVHLLKSLKHKNVMKFCNYWFDDQKKTINVITELFTS<br>GSLRHYRRKHPRVDLKAIKNWARQILHGLDYLHSHQPPVIHRDLKCNIFVNGNHGEVKIGDLGLATIMRTPKARSVIGTPEFMAPEL<br>YDENYDELVDIYSFGMCMLEMFTLEYPYSECKNPAQIFKKVSKGVKPAALSKIANPEVKHFIEKCLVPSSERLSAKELLQDSF         |
| BdMAPKKK29 | WMRGALLSGSGFMVYEGISDEGAFFAVKEVSLDQGSNAQQSILALEQEIALLSQFEHENIVQYYGTDKEESKLYIFIELVTQGSLS<br>LYQYKLRDSQVYATRQILNGLVYLHERNVVHRDIKCANILVHANGSVKLADFGFLAKEMSKINMLRSCKGSVYWMapeVNVNPRKT<br>YGAADMWSLGTVLEMLTRQIPYDVEWTNAFFMIGRGERPPISYLSKEAQDFISQCVRVDPPEERPSASQLLAHPFV                 |
| BdMAPKKK30 | LKFGNMVASGNGDLYRGSYCSQDVAIKVVPERISADMYRDFAQEVYIMRKVRHKNVVQFIGACTRQPNLYIITDFMSGGSVYDCL<br>HKNSAFKLPEILRVATDISKGMNYLHQNNIIHRDLKTANLLMDENKVVKVADFGVSRVKDQSGVMTAETGTYRWMAPEVIEHRPYD<br>HKADVYSFGIVLWELLTGKIPYQGLTPMQAAVGVVQKGIPIPKDTHPKLADLVQKCVHGDASERPEFSQILEIL                    |
| BdMAPKKK31 | LLVGHFASGAYSRLYKGVYDDKPAVAKFIRQPDNDNGKIAAKLEKQYNTAINALSHLYHKNVIKLVAAKCEPVFYILTEFLPGGS<br>LRSYLHSTQHHPLEKIISIALDIARGLEYIHSQGVVHRDIKPENILFDENFNVKIADFGIACEETLDCDLLVQDEGTYRWMAPEMLKRR<br>AYNRKVDVYSFGLILWEMVSGRLPYDNMIPFQVAFVAHYNNMKPILAPDCPKALRPLITQCCAFHPDKRPFDFWHIVKIL           |
| BdMAPKKK32 | LLIGHRFASGAYSRLFHGIYKEQPVAVKFIRLPDDGEDTELAARLEKQFTTEVTILSRDLHNNVIKLVGACSCPPVYCVITEFLSGGSLR<br>AFLRLECKSLPLEKIISIALDIAHGMEYIHSQGVVHRDVKPENILFDGEYCAKVVDFGVAFEDVYCNTELEDDPGTYRWMAPEMCKRK<br>PYGRKVDVYSFGLLLWELVSGSIPYEMTPVQAAFAVNVNKNLSPVVPSSCPAPLRQLMEQCWSSQPKRPEFSEVVPIL         |
| BdMAPKKK33 | FRRGEEVTKGYIAKWYGSKVFVKILDKESFSDCDSIDSKHELTLEKARHPNLVQFVGAVTQNVPLMIVSEYHQNGDLASYLETKG<br>RLQSYKAIRFALDIARGNLYLHECKPEPIIHGDLSPKNIVRDEGTLVKAVGFSFGLIKVSEDKLRMARPVSKFDSVYVAPEIYRNETFD<br>RSVDTFAFGLILYEMIEGTPAFHPKPEEAAKMICLEGLRPLFKNKPKSYPEDVKELIQECWDTTPSVRPTFSDIERL              |
| BdMAPKKK34 | WNRGVLLSGSFGTVYEGISDEGVFFAVKEVCSVDQGSNAQQCIFLEQEIALLSQFEHENIVHYGTDKEDSKLYIFLELVQGSLSV<br>LYQYKLRDTHVSAYTRQILNGLTYLHERNIVHRDIKCANILVHANGSVKLADFGFLAKEATKLNMLKSKCGTVYWMapeVNVNPKKT<br>YGAADIWSLGTVLEMLTRQLPYDLEWTQALYRIGKGEPPQIPNVLSRDARDFISQCVKPNPEDRPSASKLLDHPFV                 |
| BdMAPKKK35 | LLIGHRFASGAHSRLFHGIYQEQPVAVKFIRLPDEEEAELSAQLEKQFSTEITMSHLHHRNVIKLVGACSSPPVFCVLTFLSGGSLR<br>AFLHKQEHSKSLPLEKIISVGLDIAHGMAIYHSQGVVHRDVKPENIIFDGECCAKIVDFGIACEEA YCDPLANDPGTFRWMAPEMMKHK<br>PYGRKVDVYSFGLILWELTGSVPYDDLTPFQAAFAVFDKNVRPTIPVSCPAALRLIEQCWALQPKRPEFWQIVQLL            |
| BdMAPKKK36 | FRKGDEVLTGTYQVAKWNGTKVSVKILDRESYCDQEAINSFRHELTVEFEKVRHPNVVQFVGAVTQNPMMIVSEYHANADLASIYQR<br>KGRHLAQKVLRYALDIARGMTYLHQCKPDPIIHCDLKPKNIFLDNNGQMKVGGFGLTRLLKIAPDKVKLANHEALVDTFSYYTAPEL<br>HRNELFDSSVDAYAFGFILFEMVEGLPHANGKASESSHMQPRYDGMRPSLKNKLGYPADFKALIEECWDTHTMARPTFSEIIRL       |

|            |                                                                                                                                                                                                                                                                                                   |
|------------|---------------------------------------------------------------------------------------------------------------------------------------------------------------------------------------------------------------------------------------------------------------------------------------------------|
| BdMAPKKK37 | LDMGAPFAQGAFGKLYRGTYIGEDVAVKLEKPENDTERARSLEQQFVQEVMMMLSTRHPNIVRFIGACRKSIVWCIVTEYAKGGSV<br>RQFLARRQNKA VPLRLAVKQALDVARGMAYVHALGFHHRDLKSDNLLIAADRSIKIADFGVARIEVKTEGMPETGTYRWMAPEMIQ<br>HRPYDVKVDFVYSGFVILWELITGMLPFTKMTAVQAFAVFNKGPVPHDCLPSLSHIMTRCWDANPEVRPPFTEIVCML                               |
| BdMAPKKK38 | LHMGMPFAQGAFGKLYRGTYNGMDVAIKLLERPEAAPVQAQLLEQQFVQEVMMMLATLRHPNIVKFIGACRKPVMVWCIVTEYAKGG<br>SVRNFLTRRQNRSVPLKLA VKQALDVARGMAYVHGLGFHHRDLKSDNLLISGDKSIKIADFGVARIEVKTEGMPETGTYRWMAPEM<br>IQHRPYNQKVDVYSGFVILWELITGTLPAKMTAVQAFAVFNKGVPTIPHDCLPALGEIMTRCWDANPDVRRPFTDVRML                             |
| BdMAPKKK39 | LKFEQKLAAGSFGDLYHGTYCSQDVAIKVLKPERVSDMLREFAQEVIYMKKVRHKNVVFQFIGACTRPILCIVTEFMRGGSIFDYIY<br>NHRGTFQLVDVLRIASDVS KGMSYLHQINIIHRDLKTANLLMDDKVKVADFGVARVKDQSGVMTAETGTYRWMAPEVIEHSPYDH<br>RADVFSFGVVLWELLAGKLPYEDMTPLQAAVAVVQKDLRPTIPADTHPMLIGLLQKCWQRDPALRPTFAEILDIL                                  |
| BdMAPKKK40 | FTNGKDL SKGTFRKATWRGIPVAVKLLDDDDVINDENKVAQFRDELVDLQLIRHPNVVQFLGAVTQSNPMMIVMEFMPKGDRLKHLN<br>KKGALEPSYAVKLALDIARGMSYLHEHKPQSIHRDLEPSNLRDDTGHLKVADFDLCKMLKWRKRVREEKPVTSVGNACRYVAPEV<br>LRTEEYDNKVDVYSGFVILWELITGTLQEMIEGCLPFYDKKIDEIEKAHSSKERPAFRAPPKHYAHGLKELIEQCWSENADRPFDRVVIDRL                 |
| BdMAPKKK41 | LEIRYVIAQGTGTVYRGTYDGDVAVKLLDWGEDGFATEAALRTSFKQEVAVWHKLSHPNVTKFVGASMGATDLKIPANDSG<br>ARANLPARACCVVVEYLAGGTLKQYLIKNNRRKLA YKVVVQLALDL SRGLSYLHSRKIVHRDVKTENMLLDTQRNLKIADFGVARV<br>EAQNPKDMTGATGTLGYMAPEVLDGKPYNRKCDVYSGFVILWEIYCCDMPYPDL SFADVSSAVVHQNLRPDVRCCPSAFANIMRK<br>CWDANPKRPPDMDEVVQLM    |
| BdMAPKKK42 | LFIGNKFAAGANSRIYRGYKQRAVAVKVMRIPERDEARRALLEDFQNSEVAFLSRLYHPNIVQFIAACKPPVYCIITEYMSQGLTRM<br>YLNKDPYSLSPETILKALDISRGM EYLHAQGVIIHRDLKSNL LLDNDEMVRKVADFGTSCLETRCQATKGNKGTYRWMAPEMIKE<br>KPYTRKVDVYSGFVILWELITCLLPQGMTPVQAAVAASEKNLRPPLSSCPPVLLNLIKRCWSANPARRPEFSYIVSVL                              |
| BdMAPKKK43 | MFVSGKIGEGAHGKVKYKGYGDKIVAIKVLNSGSTPEERATLEARFIREVNMMCRVKHNDLVKFIGACKPELMVIVSELLPGMSLKN<br>YLNIRPSQLDIHTAIGYALNIARALECLHANGIIHRDLKPNL LLLTANRKKVKLTD FGLAREETVTEMMTAETGTYRWMAPELYSTV<br>TLQRGEKKHYTNKVDVYSGFVILWELLTNKMPFEGMSNLQAAVAAAFKQVRPPPEETPQELVFIVQSCWVEDPTLRPSFSQIIRMLD<br>AFL            |
| BdMAPKKK44 | WKRKLLGSGTFGQVYLGFNSENGQCAIKEVQVISDDPHSKERLQQLNQEIDMLKQPSHPNIVQYYGSEMTEDTLSIYLEYVSGGSI<br>HKLLEYPGPFKEPVIRNYTGQILSGLAYLHGKNTVHRDIKGANILVGPNGEVKLADFGMAKHISFAEIRSFKGSFYWMAPEVIMNSK<br>GYSLAVDIWSLGCIIEMATARPPWHQYEGVAAIFKIANSKDIP EIPDFSEEGKSFLQMCLKRDP AARASASQLMDHPFV                            |
| BdMAPKKK45 | LFVGRIGEGGHAKVYEGKYKNQNVAIKIVHKGDTPEEVKQRGRFLREVTMLSRVQHKNLVKFIGACLEPVMVVTTELLVGGSLR<br>KYLVSRLRPNLEPRTAVGFALDIARAMECLHAHGIIHRDLKPENL LLLTADQRTVKLVDLGLAREETLTEMMTAETGTYRWMAPELYS<br>TVTLRHGEKKHYNHKVDVYSAFVILWELLHNRLPFEGMSNLQAAVAAAFKNIRPSADNLPEELSEILTSCWKEDPNERPNTQIVQML                      |
| BdMAPKKK46 | LVIKGV IARGTFGTVHRGVYDGDVAVKLLDWGEDGHRSEQEITALRSFAQEVAVWHKLDHPNVTKFIGAIMGARDLNVQTEHGH<br>LGMPSNICCVVVEYLAGGALKNFLIKNNRRKLAFKVVVQLALDLARGLSYLHSEKIVHRDVKTENMLLDKTRTVKIADFGVARVEAS<br>NPSDMTGETGTLGYMAPEVLNHPYNRKCDVYSGFVILWEIYCCDMPYPDL SFSEVTSAVVRQNL RPEIPRCCPSALANVMKRCWDA<br>NPKRPEMAEVVSLI    |
| BdMAPKKK47 | LVVRGV IARGTFGTVHRGVYDGDHVAVKLLDWGEDGHRSEQEVTAVRAAFSQEVTVWHKLDHPNVTKFIGAIMGARDLNIQTENG<br>NIGMPTNVCCVVVEYLP GGALKTFLIKNNRRKLAFKVVVQIALDLARGLSYLHSSKIVHRDVKTENMLLDKTRTVKIADFGVARHEA<br>ANPSDMTGETGTLGYMAPEVLNPNYNRKCDVYSGFVILWEIYCCDMPYADLSFSEVTSAVVRQNL RPEIPRCCPSSFANVMKRCW<br>DANPKRPEMAEVVSM L |
| BdMAPKKK48 | LEIRAKFASGRHSRVYSGRYAGREVAIKMVSQPEEDAALAELE RQFASEVALLRLRHQNIISFVAACKPPVFCIITEYMAGGSLRK<br>YLHQEPYSVPIELVLKALDIARGMSYLHSQILHRDLKSENILLGEDMSVKVADFGISCLESQCQSGKGTGTYRWMAPEMIKEKN<br>HTRKVDVYSGFVILWEILTSVPFSEMTPEQAIAV ALKNARPLPASCLAMSHLISQCWATNERRPQFDDIVAIL                                     |
| BdMAPKKK49 | FTKAIIGKGSFGEILKANWRGTPIAVKRILPSLSDRLVIQDFKHEVNLLIKLRHPNIVQFLGAVTETKPLMLITEFLRGGDLHQYLKEK<br>GSLSPVTA VNFALDIARGMAYLHNEPNV IHRDLKPNRILLVNTAANHLKVGD FGLSKIIKSQHANDVYKMTGETGSYRYMAPEVFK<br>HRKYDRKVDIFSFAMILYEMLEGDPPFSNYEPYEA AKYVADGHRPAFRSKGHISELKDLTELCWDADINLRPSFLEILKRL                      |
| BdMAPKKK50 | TKLEELLGKGAMKTVYKGFDEV RGV EAVWNQANLADVLRTPDALHRIYSEVHLLSTLRHDSIAFHASWLSTTTSSSSSPRAGAGG<br>RTFNITELFSSGTLSYRLRYPRVSLRAVRGWARQILRGLAYLHGHDPPVIHRDLKCDNLFVNGHQGTVKIGDLGLAAVLRGARASA<br>HSVIGTPEFMAPEMYDEDYGVLDVYSGFVILWEIYCCDMPYADLSFSEVTSAVVRQNL RPEIPRCCPSSFANVMKRCWDA<br>SAQELLLDPF              |
| BdMAPKKK51 | LRRLRTLGRGASGAVVWLASDDASGELLA VKSGSAAARLQREGRVLAGLCSPHIVPCLGSRAAPGGEYQLFLEFAPRGLADEAARST<br>GGRLAERAIQGYAADVARGLAYLHGNSLVHGDVKARNVMVGADGRAKLADFGCARSTTATDSGRPIGGTAPFMAPEVARGEEQGP<br>AADVWALGCTVEMATGRAPWSDMDDVFAAVHRIGYTDAVPELPGWLPDAKDFLGKCLARNPRHRPTAAQLLEHPFL                                 |
| BdMAPKKK52 | WTRLRTLGCASGAVVSLATDAASGELFAVKSVRGAADADLLSREQILSGLSSPHIVRCIGGLGEDRDGSHLFLFEPAGGSLADEV<br>ARNGGFLEEHAIRYAADVLRGLAYIHGESLVHGDVKARNV VIGVDGRAKIADFGCARALDSTRPIGGTAPFMAPEVARGEEQGPAA<br>DVWALGCTIEMATGRAPWSDMDDVLA AVHRIGYTDAVPEVPMWMSAEAKNFLAMCFARNARDRCTAEQLEHPFV                                   |
| BdMAPKKK53 | WTRVRTLGRGASGAVVSLAAADLSGALFAVKSARAAGAEQLRREGDILSGLSSPHVLPCLGFRADSGECQLFLEFAPGGSVADVAER<br>SGRLEECAIRYAADVARGLA YLHGMSLVHGDVKGRNVVVGADGRAKLADFGCARTVDSDRPIGGTAPFMAPEVARGEEQGPAA<br>DVWALGCTVEMATGRAPWSDMDDVLAAMHRIGYTDAVPEVPGWLSAEAKHFLAMCFARDARNRCTAAQLLEHPFL                                    |
| BdMAPKKK54 | GRYADV LGLGSVKKVYRAFDQEEGIEVAWNVRRLRALADRD PGMVDR LHAEVRLRLSLSHDHIIGFHKVWLD RDAGVLSFITEVCN<br>SGSLREYRARHRHVSVKALKKWARQILLGHLHHTHDCPIHRDLNCSNVFINGNTGQVKIGDLGLAAIVDKTHVAHTILGTPEFMAP                                                                                                              |

ELYTETYTESVDIYSYGMCVLEMVTEMPYAECESVVQIYHSVTRGVPPAALRRLKDPPELRFIDRCIGQPRNRPTAAELLLDPF

|            |                                                                                                                                                                                                                                                                                                  |
|------------|--------------------------------------------------------------------------------------------------------------------------------------------------------------------------------------------------------------------------------------------------------------------------------------------------|
| BdMAPKKK55 | LRRVRTLGRGASGAVVWLASDEASGELLA VKSAAAAGGAARLLEREGCVLTGLCSPHIVPCLGSRAAECEGEYQLFLEFAPGGSLAD<br>EAAKSAGRLPEPAIRAYAGDVARGLEYLHARSLVHGDVKARNV VIGGDGRARLTDGFCARPVDSLLPMGGTAPFMAPEVARGEEQ<br>GTASDVWALGCTVEMATGRAPWSDMSDLFAAVHRIGYTADVPEVPGWLSAEAKDFLDGCFRRTPGDRSTAAQLLDHPFI                            |
| BdMAPKKK56 | MGSSKKMAQLNTEIQLLKLKHQNIKESFASWIDEDNKTVNITELFTSGSLRQYRKKHKKVSIKAMRRWAVQILTGLEYLHSQEPAIL<br>HRDLKCDNIFINGNGGTVKIGDFGLATFLQQKTKSIKGTLEFMAPELFTGVYNELVDIYSFGMCMLEMVTCYEPYSECQGMGHIYK<br>KISEGKKPAALSKVEDAELRSFIEICLAPVAERLPASELLRSSF                                                                |
| BdMAPKKK57 | WRRGPVIGRGASATVSIATDALTGEAFVKS VGI ALAGALRREQSVLSALSSPYV VSCVSGSGASDDGRSYELFLELAPGGSLADEMK<br>RCGGRCEEALVASRAGDVLRLGLAHVHGAGIAHCDVKARNVLLGADGRAKLADFGCARWTTKAKEDGIGNAIMGTPMFMSPEAAR<br>GEAQGAAADIWALGCTVIEMATGGAPWRFSSPVAALHHV AHSGDVPEAPSWFSEQKDFLARCLVRDPAQRWTAEQLEHPFV                        |
| BdMAPKKK58 | WKRVRTLGRGASGAEVFLAADDVSGELFAVKSAGAGATLRREQEIMAGLRSPNVLSICIGGRVGHGDSYQLFLEFAPGGSLADAVRS<br>GAGGRLEERVVRAYAEDMAAGLAYLHGAGLVHGDVKPRNVVIGGDGRAKLADFGCSRKTDSRGPILGGTAPFMAPEVARGEEQGP<br>AADIWALGCTVEMATGRAPWNGTGMEDDGVLAALHRIGYTDDAVPEVPKWLSADAKDFLARCLTRRPSDRCTAAQLLEHPFL                           |
| BdMAPKKK59 | LTRLRTLGRGSSGAVVSLFAADGELLA VKS AATGGAQLRREGILASLCSPIYVLPCLGSRAAAGGEYQLLEFAPGGSLADEVARN<br>GGRLEEPAVRAYAGHVARGLAYLHGESMVHGDVKARNV VIGADGWAKLADFGCARRCPGPGPGPILGGTAPFMAPEVARGEEQGP<br>AADVWALGCIEMATGRAPWADMDAGCGAADVISAVRIGYTDAVPEAPERMSPAKDFLDKCLRRSAGERWTAQLEHPFL                              |
| BdMAPKKK60 | WTRGKICIGKAGFTVHSAVDRATGRAFAVKSVDKQGGAMAMACLESEIRILRRLRSPYVVA YLGD DATAASRNLMELVPGGTA<br>ADAAKGGLGERAARRVLRVASALQYLHVDVAGVVHGDVKG RNVLLGSGIDSTKLADFGAARLVSEAPRGPRTPAWMAPEVARG<br>GAPTASDVWSLGCTAVELLTGKRPWSETGGWLEVGAMLLIGFGGKRPEFPAAACVSDSCRDFLDKCLRRDAGERWSCEQLL                               |
| BdMAPKKK61 | WTRGPAIGRGSSAVVSLAVDRVTGVVFAVKS V GAGRAELRREQSILRGLSSPYVVRCLGYVADGSGEMLMEYAAGGSLADEIRRC<br>GGRCPEALIRCRARDVLRGLAHAHAGVAHCDVKARNV L V GSHGRAMLADFGCARRIVASSREPQLMGMGGTTPMFMAPEAARGEE<br>RGAAADVAVGCTVIEMATGGAPWRSRFPADPVAALHHV AFSGEAPELPPWLSEAGKEFLGRCLRQDPRERWTAEQLEHPWF                        |
| BdMAPKKK62 | LALGEQVGHGSCGTVYHALWYGS DVA V K VFSKQDYSEEMIQTFRQEVSLMKKLRHPNILFMGAVASQQRLCIVTEYLPRGSLFSL<br>RRTTGKLDPRRRHMAIDIARGMNYLHNCSPITVHRDLKSSNLLVDKNWNVAVDFGLSRLK VETFLSTKTGKGTQPWMAPEVLRNE<br>PSNEKSDVYSFGVVLWELVTEKIPWDNLNIMQVIGAVGFM DQRLEIPSGMDPQWASMIESCWSDSPQRRPSFQELLERL                          |
| BdMAPKKK63 | LVIGE QVQGSCGTVYHALWYGS DVA V K VFSKQDYSEEMINTFRQEVSLMKKLRHPNILFMGAAASQQQLCIVTEFLPRGSLFRLLQ<br>KNTGKLDPRRRVNMADIARGMNYLHNSIPTVHRDLKSSNLLVDKNWTVK VADFGLSRLKLETFLTTKTGKGTQPWMAPEVLRSE<br>PSNEKSDVYSYGVVLWELITQKVPWDTLNTMQVIGAVGFM DHRLEIPSDADPQWSSMIESCWVSDPQRRPSFRELLERL                         |
| BdMAPKKK64 | LEELRELGSFTGTVYHGKWRGTDVAIKRIKSCFAGRSSEQEKLTKDFWREAQILSKLHHPNVVAFYGVVPDGTGGTLATVAEFMV<br>NGSLRNVLLRKDRTLDRRRLIAMDAAFGMEYLHLSKSI VHF DLKCDNLLVNL RDPQRPICKVGDVGLSRIKRNTLVSGGVRGTLPW<br>MAPELNGSSSRVSEKVDVFSFGIVLWEILTGEOPYANMHC GAIIGGIVNNSLRPIPETCEPEWRSLMEQCWSANPDVRSFTKVTDR<br>L               |
| BdMAPKKK65 | LEELRELGSFTGTVYHGKWRGTDVAIKRIKSCFTGRSSEQERLAHEFWREAEILSKLHHPNVVAFYGVVKDGGPGLATLTFEMV<br>NGSLRHVLQRKDKSPDLRRLIAMDAAFGMEYLHLSKNIVHFDL KCDNLLVNL RDPSPICKVS                                                                                                                                         |
| BdMAPKKK66 | LEIRYVIAQGTGTVYRGT YDGDVAVKLLDWGEDGFATEAETAALRSSFKQEVA VWHKLSHPNVTKFVGASMGTTDLKIPANDTG<br>ARANLPVRACCVVEYLAGGTLKQYLIKNNRRKLAYKVVVQLALDLSRGLSYLHSQKIVHRDVKTENMLLDTQRNLKIADFGVARV<br>EAQNPKDMTGATGLGYMAPEVLDGKPYNRKCDVYSFGICLWEIYCCDMPYPDL SFAADVSSAVVHQNL RPDVPRCCPSAFANIMRK<br>CWDANPKRPMDEVVQLM |
| BdMAPKKK67 | WKKGKLLGSGTGFQVYLGFNSESGHFCAIKEVQVILDDPHSKERLRLQNQEVDLLRQLSDRNIVQYYGSQLTDEALS IYLEYVSGGSI<br>HKLLRDYGPFPKPVIRNYTRQILSGLAYLHGRNTMHRDIKANILVGP TGDKLADFLGAKDITSFAEISSFRGSPYWMAP EAVMHSK<br>GYSLAVDIWSL GCTVIEMATARHPWHPLEDVPALFKIANSKDIPEIPESISKEGKDFLSLCLKRDPLEP SATQLLDHPFV                      |
| BdMAPKKK68 | WTRVRTLGRGASGAEVFLAADDASGELFAVKSASAAAMGAAAALRREQGIMAGLRSPNVLSICIGRGRDGSYQLFLEFAPGGSLA<br>DGGRLEESA VRAYAADLATGLAYLHGAGLVHGDVKPRNVVIGGDGCAKLADFGCSRKADSCAPILGGTAPFMAPEVARGEEQGA<br>ADIWALGCTVEMATGRAPWNGTGMDDDGVLAALHRIGYTYAVPQPQWLTA EAKDFLSRCLVRRPGDRCTAAQLLEHPFL                               |
| BdMAPKKK69 | WTRVRTLGRGASGAEVFLAADDASGELFAVKSASAAARGAAATLRREQGIMAGLRSPNVLSICIGRGGHGDGSYQLFLEFAPGGSLA<br>DGGRLEEAVRAYAADVATGLAYLHGAVLHGDVKPRNVVIGSDGRAKLADFGCSRKAGSCMPILGGTAPFMAPEVARGEEQGA<br>ADIWALGCTVEMATGRAPWNGTGMDDDGVLAALHRIGYTDAV PQPQWLSADAKDFLARCLIRRPSDRCTAAQLLEHPFL                                |
| BdMAPKKK70 | WVKGGHIGSGSFGSVYEAMSDGFFFAVKEVSLIDQGINAKQRIIQLEHEVLSLSRLEHDNIVQYYGTDKEDGKLYIFLELVSQGS LAA<br>LYQRYCLQDSQVSA YTRQILNGLNYLHQRNVLHRDIKANILVDANGSVKLADFLGAKEMSILS QARSSKGTVFWMAPEVAKAKPH<br>GPPADIWSL GCTVLEMLTCKVPYDMEWTHALLKIGRIGIPKIPDKLSE DARDFIACVQANPKDRPSAAQLFDHPFV                           |
| BdMAPKKK71 | LDIAENLASGSRGDTLRGT YGGEEV FVKVSSSEDPSQIVSKEFKQEILMLREVDHANIIRLIGSCTKEPQFCMMTEYMSGGSLDFDLKNE<br>HNVL DLP MILKFALDICRGMAYLHQKGIHRDLK SANLLIDKYQVVKVAHFGLSR YQDQEGVMTAETGT YRWMAPEVMNHQHYGH<br>AADVYSFAIVLWELMTRKIPYDTLTTLQA AVEVLKGM RPPLENAPRLLTLMQRCWDASPSKRPFSDAITEL                           |
| BdMAPKKK72 | LSIIKKLASGSCGHTFLGT YGGEEVSVKVLRSADATQILWKEFKQEILMLREYVHANIIRSIGSCIKPPHYIITEYMSGGSLDFDLHNKH<br>NVLDLPMILKFALDICRGMAYLHQKGIHRDLK SANLLMDKDHVVKVADFGLSRYQDREGVMTAETGT YRWMAPEVMKHQQYGP<br>AADVYSFAIVLWELMTSKMPYDTINPIQA AFNVWQGM RPQIPKNAHPRLLTLMQRCWDASPSKCPFSDAIAEL                              |



|            |                                                                                                                                                                                                                                                                              |
|------------|------------------------------------------------------------------------------------------------------------------------------------------------------------------------------------------------------------------------------------------------------------------------------|
| BdMAPKKK73 | LTKGERIASGTSADLIVNHENIIKYYGACTNHPNYCIVTEYMPEGNLYEFLHKQKHLDDLREILRAISISKGMEYLHRNIIHRDLKTAN<br>VLKGYGQALKIEGFNVAILGSQEDQMTAETGTWRMAPEVINHKPYDHKADVFSFAIVLWELVTLKVPYDKMTPLQAALGVRQGR<br>LEIPR VHPGLSKLIQCWDEDPNARPVFGEIIIQL                                                     |
| BdMAPKKK74 | FLFHRYRGTYKGSVAIKMLRVAHLNNAVEVEFLQEVILRSVNHENILQFYGASTRHPNCVITEYMPEGNLYEFLHKQNDLLEINEI<br>LRAISISKGMEYLHRNIIHRDLKTANVLKGYGQVLKADFGVSRIGSQEQMTAETGTWRMAPEIIDHKPYDHKADVFSFAIVLWE<br>LITLKVYDDMTPLQAALGVRQGFRLQIPSGTHPGLSKLRQCWDEDEPEIRPAFGEIITQL                               |
| BdMAPKKK75 | LKMGDMIASGSCGDLFHGTDFYGEDVAVKVLKAEHLNKNVWNEFTQEVYILREVCHTNVVRFIGACTKPPKFCIITEYMSGGSYDFV<br>HKQRNVLDLPTLLKFACDVCRGMCYLHQRIIHRDLKTANLLMDKDHVVKVADFGVARFQDQGGIMTAETGTWRMAPEVINHQ<br>YDNKADVFSFAIVLWELIASKIPYDTMTPLQAAVGVQRGLRPLPENTHPKLLDLLQRCWETIPSNRPSFPDILTEL                |
| OsMAPKKK1  | LVIGERIGLSYGEVYRADWNGTEVAVKKFLDQDFYGDALDEFRSEVRIMRRLRHPNIVLFMGAVTRPPNLSIVSEYLPRGSLYKILHR<br>PNCQIDEKRRIMALDVAKGMNCLHISVPTIVHRDLKSPNLLVDNNWVVKVCDFGLSRLKHSTFLSSKSTAGTPEWMAPEVLRNEQS<br>NEKCDVYSFGVILWELATLRMPWSGMNPQVVGAVGFQDKRLDIPKEIDPLVARIWECWQKDPNLRPSFAQLTSAL            |
| OsMAPKKK2  | LLIGERIGLSYGEVYHADWNGTEVAVKKFLDQEFYGDALAEFRCEVRIMRRLRHPNIVLFMGAVTRPPHLSIVSEYLPRGSLYTIHR<br>PDCQIDEKCRIMALDVARGMNCLHISVPTIVHRDLKSPNLLVDNNYIYRSVILDFHV                                                                                                                         |
| OsMAPKKK3  | LVLKEKIGAGSFGTVHRADWNGSDVAVKILMEQDFHPERLKEFLREVAIMKSLRHPNIVLFMGAVTQPPKLSIVTEYLSRGSYLRIH<br>HGARENLDKRRRLSMAFDVAKGMNYLHKNRNPPIVHRDLKSPNLLVDKKYTVKVCDFGLSRLKANTFLSSKTAAGTPEWMAPEVIR<br>EPSNEKSDVYSFGVILWELMTLQPPWSTLNPAAVAVGFNGRRLEIPSSVDPKVAAIMESCWTKEPWRPSPFASIMESL          |
| OsMAPKKK4  | LHIGERIGLSYGEVYHADWNGTEVAVKKFLDQDLSGVALDQFKCEVGIMSRLRHPNIVLFLGYVTQPPNLSILTEYLPRGSLYRLLH<br>RPNQIDETRRLKMALDVAKGMNYLHASHPTIVHRDLKSPNLLVDKNWVVKVSDFGMSRLKHHTFLSSKSTAGTPEWMAPEVLRNE<br>PSNEKCDVYSFGVILWELATMRVPWVSGLNPMQVVGAVGFQNRRLLEIPKEIDPLVATIISWENDPSKRPSFSQLSPL           |
| OsMAPKKK5  | LVIGEIQGGSCGTVYHALWYGSVAVKVFSKQYEEVQITFRQEVSLMKKLRHPNIVLFMGAVTSPQRLCIVTEFLPRGSLFRLLQR<br>NNTKLDWRRRVHMALDIARGMNYLHHFSPLIHRDLKSSNLLVDKNWTVKVCDFGLSRLKRETFLLTKTGKTPQWMAPEVLRNEP<br>SDEKSDVYSYGVILWELVTQKIPWENLNSMQVIGAVGFMNHRLEIPSETDPQWTSLLSCWETDSQLRPSFQQLLERL               |
| OsMAPKKK6  | ITIGERIGLSFGEVYRGWEHGTVEVAVKKFLQDISSDALEEFRTVEVRIKRLRHPNIVLFMGAITRVPNLSIVTEFLPRGSLFRLIHRP<br>NQLDERKRLMALDVARGMNYLHNCTPVIHRDLKSPNLLVDKNWVVKVCDFGLSKMKNTFLSSRSTAGTAEWMAPEVLRNEPS<br>DEKCDVFSYGVILWELCTLLQWEGMNAQVVGAVGFQNRRLDIPDNDPAIAEIIAKCWQTDPKLRPSFADIMASL                |
| OsMAPKKK7  | ITLGERVGLSFGVEYKGEWHGTVEVAVKKFLQDISSDALDEFRTVEFQIMKRLRHPNIVLFMGAITRVPNLSIVTEFLPRGSLFRLIHR<br>PNNQLDERRRLMALDVARGMNYLHNCSVPVHRDLKSPNLLVDKNWVVKVCDFGLSRKMNSTFLSSRSTAGTAEWMAPEVLRN<br>EPSDEKCDVFSYGVILWELFTLLQWEGMNPQVVGAVGFQNRRLDIPAHVDPTIAEIIIRRCWQTDPKMRPSFSEIMSSL           |
| OsMAPKKK8  | WKKGKLLGSGTFGQVYQGFNSGQMCIAKEVVKISDSSNSKECLRQLHQEIVLLSQLSHPNIVQYYSGLSSETLSVYLEYVSGGSI<br>HKLLQEYGAFAEVLNRNYAQILSGLAYLHGRNTVHRDIKGANILVDPNGDIKLADFGMAKHISHTSFKGSPYWMapeVIMNT<br>NGYSLVDIWSLGTIEMATARPPWIQYEGVAAIFKIGNSKIDIPDHLSEFAKNFLKLCQRDPAARPTAAQLMEHPFV                  |
| OsMAPKKK9  | WKKGKLVGRGTFGHVYIGFNSDKGEMCAMKEVTLFSDDPKSKESAKQLCQEILLNRLQHPNIVRYYGSEMVDKLYIYLEYVSGG<br>SIHKLLQEYGFQGEPAIRSYTKQILLGLAYLHAKNTVHRDIKGANILVDPNGRVLADFGMAKHINGQQCAFSFKGSPYWMapeVIK<br>SNGCNLAVDIWSLGTIEMATSKPPWSQYEGIAAVFKIGNSKELPPIDHLSEGRDFIRQCLQRNPSSRPTAVDLLQHSFI            |
| OsMAPKKK10 | WKKGKLVGRGTFGHVYIGFNSDSEMGEMCAMKEVTLFSDDPKSKESAKQLGQEISLLSRLQHPNIVQYYSGETVDDKLYIYLEYVSGG<br>SIHKLLQEYQGLGEAIRSYTQILSGLAYLHAKNTVHRDIKGANILVDPNGRVLADFGMAKHINGQQCPFSFKGSPYWMapeVIK<br>SNGCNLAVDIWSLGTIEMATSKPPWSQYEGIAAMFKIGNSKELPPIDHLSEPGKDFIRKCLQRDPSQRPTAMELLQHPFV         |
| OsMAPKKK11 | WQKGRLLGSGTFGCVYEATNRQTGALCAMKEVNIIPDDAKSAESLQKLEQEIQLSFKHENIVQYYSGETDFEDRFYIYLEYVHPGSI<br>KYVKQHYGAMTESVVRNFRHILRGLAFLHGQKIMHRDIKGANILVDVSGVVKLADFGMAKHLSTAAPNLSLKGTPYWMapeVMVQ<br>ATLNKDVGYDLAVDIWSLGTIEMFMNGKPPWSLEGAAMFRVLHKDPPIDNLSHEGKDFLQFCFKRNPAERPTASELLEHPFI       |
| OsMAPKKK12 | LILKEKIGAGSFGTVHRADWNGSDVAVKILMEQDFHPRDFREFMREVAIMKSLRHPNIVLFMGAVTEPPNLSIVTEYLSRGSYLKLLH<br>RSGAKEVLDERRRLNMAFDVAKGMNYLHKNRNPPIVHRDLKSPNLLVDKKYTVKVCDFGLSRLKANTFLSSKSLAGTPEWMAPEVLR<br>DEPSNEKSDVYSFGVILWELMTMQPPWCNLNPAQVVAVGFGRRLDIPKDLNPQVAALIESCWAKIILSGYRLL             |
| OsMAPKKK13 | WRKGELIGSAGFGQVYLGMLNLDTGELLAVKQVLIGSSNATREKAQAHIREELEEVKLLKNLSHPNIVKRYLGTVREEDTLNILLEFVP<br>GGSIQSLGKLGSPFAVIRKYTKQILQGLEYLHNNAIHRDIKGANILVDNKGCIKLADFGASKQVAKLATITAAKTMKGTPHWMAPE<br>VIVGSGHNFSADIWSVGTVIEMATGKPPWSQYQEVALLFHVGTTSKSHPIPEHLSPEAKDFLLKCLQKEPELRSTASDLLKHPFV |
| OsMAPKKK14 | IELKERVGAGSFGTVYRADWNGSDVAVKVLTQDQVGEAQLKEFLREAIMKRVHRHPNIVLFMGAVTKCPHLSIVTEYLSRGSYLRLLN<br>KASAGEMLDLRRRLMALDVAKGINYLHCLNPPIVHWDLKTPNMLVDKNWSVKVGDGFLSFRKANTFISKSVAAGTPEWMAPEFLR<br>GEPNEKCDVYSFGVILWELMTMQPPWNLSPAQVVGAVAFQNRRLPIPQETVPELAALVESCWDDDPQRPSFSSIVDTL          |
| OsMAPKKK15 | WRKGDLLGSGAGFVFLGMDLDSGELLAVKQVLIGSSNATREKAQGHIRELEDEEVKLLKNLSHPNIVRYIGTVREENSLNILLEFVPGG<br>SIQSLGRLGSPFAVIRKYTKQILHGLEYLHNRGIIHRDIKGANILVDNKGCIKLADFGASKQVEKLATTAKTMKGTPTYWMapeVIVG<br>SGHDFSADIWSVGTVIEMATGKTPWNQEIQEVSLLYVGTTSKSHPIPEHLSPEAKDFLLKCLQKEPELRSTASDLLLHPFV   |
| OsMAPKKK16 | WKKGKLLGSGTFGQVYLGFNSENGQFCAIKEVQVISDDPHSKERLQKLNQEIIDLRLSHPNIVQYYSSEMTEDDALSILEYVSGGSI<br>HKLLREYGPFPKPVIRNYTGQILSGLAYLHGRNTVHRDIKGANILVGPNGEVKLADFGMAKHISFAEIRSFKGSPYWMapeVIMNGR<br>GYHLPVDIWSLGTIEMATAKPPWHKYEGVAAIFKIANSKEIPEIPDSFSEEGKSFLQMCCLKRDPASRFTATQLMDHPFV       |
| OsMAPKKK17 | LKFGNKVASGSYGDLYRGTYCSQDVAIKVLPKPERINADMQREFAQEVYIMRKRVRHKNVQVFIGACTKPPNLCIVTEYMSGGSVYDYL<br>HKHKGVFKLPALLGVVMDVSKGMSYLHQNIIHRDLKTANLLMDENGTVKVADFGVARVKAQSGVMTAETGTWRMAPEVIEHK                                                                                              |

PYDHKADVFSFGILMWELLTGKIPYEYLTPLQAAVGVVQKGLRPTIPKNAHAKLSELLQKCWQOEPAERPDFSEILETL

|            |                                                                                                                                                                                                                                                                                                  |
|------------|--------------------------------------------------------------------------------------------------------------------------------------------------------------------------------------------------------------------------------------------------------------------------------------------------|
| OsMAPKKK18 | WQKGLIGSGTFCVYEAANRHTGALCAMKEVNIIPDDAKSAESLKQLEQEIKFLSQFKHENIVQYYGSEYIEDRFYIYLEYVHPGSIN<br>KYVNVQHCGAMTESVIRSFTRHILKGLAFLHSQKIMHRDIKANLLVDVNGVVKLADFGMAKHLSTAAPNLSLKGTPYWMapevVQA<br>TLVKDVGyDLAVDIWSLGTIEMFTGKPPWSGLEGPAAMFKVLHKDPSIPDLSPEGKEFLRCCFRRNPAERPTASKLLEHPFV                          |
| OsMAPKKK19 | WKRGLLGSSTFGQVYLGFNSENGQFCAIKEVQVFLDDSHSKERLRQLNQEIDMLKQLSHQIVQYYGSELADEALSIYLEYVSGGSI<br>HKLLREYGPFKEPVIRNYTRQILSGLAYLHGRNTVHRDIKANILVGPNGEVKLADFGMAKHVTSFAEIRSFrgSPYWMapevMNN<br>KGYNLAVDIWSLGTIEMATAKHPWYPYEDVAAIFKIANSKDIPEIPDCFSKEGKDFLSLCLKRDVPQRPSAASLLGHFV                               |
| OsMAPKKK20 | GRYNDVLGKGASKTVYRAFDEYQGMVAVNQVLDHDFLQSPEDLERLYCEIHLKTLKHRNIMKFYTSWVDVSRNNINITEMFTS<br>GTLRQYRQKHMRVNIWAVKHWCRLSGLLYLHSHDPPHHRDLKCDNIFVNGNQGEVKIGDLGLAAILRKSVAHCVGTPEFMAPE<br>VYEEYNELVDIYSFGMCVLEMVTFEYYPYSECTHPVQIYKVKVISGKPEALYKVKDPMVVRQFVEKCLATASRRLSARELLKDPFL                             |
| OsMAPKKK21 | LEELRELGSSTFGTVYHGKWRGSDVAIKRIKKSCTGRSSELERLANEFWREAEILSKLHHPNVVAFYGVVKDGGTGLATVTEFMV<br>NGSLRHVLQRKDKYLDRRKRLIAMDAAFGLYLSKKNIVHFDLKCNDLLVNLKQSRPICKVDFGLSKIKRNTLVSGVGRGTLPW<br>MAPELLNGSSNKVSEKVDVFSFGIVMWELTGEEPYANMHYGAIGGIVNNTLRPPVASCDEPWRRLMEQCWAPDPSQRPafTEIAG<br>RL                      |
| OsMAPKKK22 | WMRGALLSGSFGMVYEGISDEGAFFAVKEVSLDQGSNAQQSILALEQEIALLSQFEHENIVQYYGTDKEESKLYIFIELVTQGSLS<br>LYQYKLRDSQVSAYTRQILNGLVYLHERNVVHRDIKANILVHANGSVKLADFLAKEMSKINMLRSCCKGSVYWMapevVNPCK<br>TYGPQADIWSLGTVLEMLTRNIPYPNVEWTNAFFMIGKGERPQIPSYLSKDAQDFISQCVQVDPQRPSASQLMHPFV                                   |
| OsMAPKKK23 | LEELRELGSSTFGTVYHGKWRGTDVAIKRIKKSFCAGRSSEKELTKDFWREAQILSKLHHPNVVAFYGVVPDGTGGTGLATVTEFMV<br>NGSLRNVLLRKRDLRRKRLIAMDAAFMEYLHKSIVHFDLKCNDLLVNLKQSRPICKVDFGLSRIKRNLTLSVSGVGRGTLPW<br>MAPELLNGSSSRVSEKVDVFSFGIALWEILTGEEPYANMHYGAIGGIVNNTLRPPVPCNCEPEWRQLMEQCWSADDIRPSFTEVTDRL                        |
| OsMAPKKK24 | YMLGDEIGKGAYGRVYKGLDLENGDFVAIKQVLENIPQEDLNIMQEIDLKLNHNKIVKYLGLSKTRSHLHILEYVENGLANI<br>PNKFGPFPELVAVYIAQVLEGLVYLHEQGVHHRDIKANILTTKEGLVKLADFGVATKLEADINTHSVVGTPYWMapevIEMSGVC<br>AASDIWSVGCTVIELTTCAPPYDQLPMPALFRIVQDVHPPPEGLSPEITDFLRQCFQKDSIQRPDAKTLMLHPWL                                       |
| OsMAPKKK25 | LFVGRIGEGAHAKVYEGKYKNQNVAIKIVHKGDTPEEMVKREGRFLREVTMLSRVQHKNLVKFIGACLEPVMVVTTELVGGSLR<br>KYLVLGRPRSLPRVAVGFALDIARAMECLHAHAHHRDLKPENLLTADQRTVVKLVDLGLAREETLTEMMTAETGTyrWMAPELYS<br>TVTLRHGEKKHYNHKVDVYSFAIWLWELLHNRLPFEGMSNLQAAVAAAFKNIRPSADNLPEELSEILTTCWKEEPNERPNTQIVQML                         |
| OsMAPKKK26 | LKFERKLASGSGDLYHGTYCSQDVAIKVLKPERVSVDMLEFAQEVYIMKKVRHKNVVQFIGACTRPPLICIVTEFMRGGSIFDFLYN<br>FRGTFQLPDLRIASDVSKGMNYLHQINIVHRDLKTANLLMDDQVVKVADFGVARVKDQSGVMTAETGTyrWMAPEVIEHLPYDQ<br>RADVFSFGIVWELLTGKLPYEDMTPLQAAVAVVQKDLRPIPADTHPMLAGLLQKCWQKDPALRPTFSEILDIL                                     |
| OsMAPKKK27 | LEIRYVIAQGTGTVYRGTYDGDVAVKLLDWGEDGFATEAETAALRTSFKQEVAVWHKLSHPNVTKFVGASMGTTDLKIPTNNSN<br>AGARTNLPARACCVVEYLAGGTLKQYLIKNSRRKLA YKVVVQLALDLARGLSYLHRSKIVHRDVKTENMLLDTQRNLKIADFGVA<br>RVEAQNPKDMTGATGLGYMAPEVLDGKPYNRKCDVYSFGICLWEIYCCDMPYPDL SFADVSSAVVHQNLRPDVPCCPSAFANIM<br>RKCWDANPKRPMDEVVQLEAL |
| OsMAPKKK28 | WNRGMLLGSSTFGTVFEGISDEGVFFAVKEVCLCDQGSNAQCCIFQLEQEIALLSQFEHENIVQYYGTDKEDSKLYIFLELVQGSLS<br>LYQYKLRDTHVSA YTRQILNGLTYLHERNIVHRDIKANILVHANGSVKLADFLAKEITKFNVLKSCKGTVYWMapevVNPKTTY<br>GPEADIWSLGTVLEMLTRQLPYGLEWTQALYRIGKGEPPAIPNCLSRDARDFISQCVKPNPQDRPSAAKLEHPFV                                  |
| OsMAPKKK29 | IRYNEVLGRGAMKTVYKAFDEVEGIEVAVSQVEIDEVMQSPDNLERLYSEVHLLKSLKHENVMKFYNYWVDDQKKTINVITELFTS<br>GSLRQYRQKHPRVDLKAIKNWARQVLRGLDYLHHTQPIIHRDLKCDNIFVNGNHGEVKIGDLGLATVMLTPRAKSVIGTPEFMAPEL<br>YDENYDELVDIYSFGMCMLMFTLEYPYSECTNAAQIFKKVSKGVKPAALAKITNIQAKQFIDKCLVPASERLSAKELLQDPFL                         |
| OsMAPKKK30 | LKFGTKVASGNGDLFRGSYCSQDVAIKVVRPERISADMYRDFAEVYIMRKVRHRNVVQFIGACTRQPNLYIVTDFMSGGSLHDYL<br>HKKNNSFKLSEILRVATDISKGMNYLHQNIIHRDLKTANLLMDENKVVVADFGVARVKDQSGVMTAETGTyrWMAPEVIEHKPY<br>DHKADVFSFGIVLWELLTGKIPYEYLTPLQAAIGVVQKGLRPTIPKNDTHPKLSELLQKCWHRDPAERPDFSQILEIL                                  |
| OsMAPKKK31 | LVIRGVIARGTFTVHRGVYDGDVAVKMLDWGEDGHREREISSLRAFAQEVAVWHKLDHPNVTKFIGAIMGARDLNIQTEHGH<br>FGMPSNICCVVEYLAGGALKNFLIKNRRRKLAYKVVVQLALDLARGLSYLHRSKIVHRDVKTENMLLDKSRVTKIADFGVARIEAS<br>NPSDMTGETGLGYMAPEVLNGHPYNRKCDVYSFGICLWEIYCCDMPYPDL SFSEVTSAVVRQNLRPEIPCCPSSLANVMKRCWDA<br>NPKRPAMAEVVSML         |
| OsMAPKKK32 | LHIGMPFAQGAFGKLYRGTYNGGDVAIKLLERPEADPEKAQLEQQFVQEVMMMLATLRHSNIVKFGACRKPVMVCIVTEYAKGGS<br>VRNFLNRRQNRSVPLKLA VKQALDVARGMAYVHGLGFHHRDLKSDNLLISGDKSIKIADFGVARIEVKTEGMTPETGTyrWMAPEVI<br>QHRPYDQKVDVYSFGIVLWELVTGNLPFANMTAVQAAFAVVKNGVRPAIPHCLPALAEIMTRCWDANPDARPPFTEVVRML                           |
| OsMAPKKK33 | LDMGVPPFAQGAFGKLYRGTYNGEDVAIKLLEKPENDPERAQALEQQFVQEVMMMLSRHRHPNIVRFIGACRKSIVWCIIETAYAKGGSV<br>RQFLARRQNKSVPLRLAVKQALDIARGMAYVHALGFHHRDLKSDNLLIAADKSIKIADFGVARIEVKTEGMTPETGTyrWMAPEMIQ<br>HRPYDQKVDVYSFGIVLWELITGMLPFTNMTAVQAAFAVVKNGARVPVQDCLPALSHIMTLCWDANPEVRPAFTDIVCML                        |
| OsMAPKKK34 | LVVRGVIARGTFTVHRGVYDGDVAVKMLDWGEDGHRSEQDIAALRAAFSQUEVSVWHKLDHPNVTKFIGAIMGARDLDIQTESGH<br>LAMPNSICCVVEYLAGGSLKGLIKNRRRKLAFKVVVQIALDLARGLSYLHRSKIVHRDVKTENMLLDKTRTVKIADFGVARLEAS<br>NPSDMTGETGLGYMAPEVLNGSPYNRKCDVYSFGICLWEIYCCDMPYPDL SFSEVTSAVVRQNLRPEIPCCPSSLANVMKRCWD<br>ANPKRPEMAEVVSML       |

|            |                                                                                                                                                                                                                                                                                     |
|------------|-------------------------------------------------------------------------------------------------------------------------------------------------------------------------------------------------------------------------------------------------------------------------------------|
| OsMAPKKK35 | LEEIRELGSPTYGAVYHGKWRGCDVAIKRIKASCFAGRPSERERLIADFWEAQILSSLHHPNVVSFYGVVRDGPDGSLATVTEFMIN<br>GSLKQFLRKKDRITDRRKRVLAMDAAFGMEYLHGKNIHVFDLKCENLLVNMRRDPQRICKIGDLGLSKVKQHTLVSGGVRGTLPW<br>MAPELLSGKSNMVSEKIDVYSFGIVMWELLTGEEPYSDMRAAAIIGGIVNNSLRPQIPSWCDPEWKSMLMENCWASEPADRPSFTEISQR<br>L |
| OsMAPKKK36 | GRYTEVLGKGAFKTVYKAFDQLEGLEVAWNQIKVGDILRNDDLERLRSEVRLKTLKHKNIKFYNSWLDKNNNINFITEVFTSQT<br>LRQYRIKHKKVDVRLKWSRQILSGLVYLHSHDPPVIHRDLKCDNIFVNGNQGEVKIGDLGLATILDNARSAHSIIGTPEFMAPELYD<br>EYNELVDIYAFGMCLLELVTFEYPYCECSNAAQIYKKVSDGKPSLAKIEDPEVRFIEKCIKASQRLSAQELLMDPFL                    |
| OsMAPKKK37 | LHMGMPFAQGAFGKLYKGTYNDEDVAIKLLERPEADPERAGLMEQQFVQEVMMMLATLRHPNIVKFIGACRKPVMVWCIVTEYAKGG<br>SVRQFLMKRQNRVPLKLAVKQALDVARGMAYVHALGFHRLKSDNLLISGDKSIKIADFGVARIEVKTEGMPETGTYRWMAP<br>MIQHRPYDQKVDVYSFGIVLWELITGMLPFANMTAVQAFAFVNVKGRPAIPQDCPLVLEIMTRCWDPNPDRPPFTVEVRML                   |
| OsMAPKKK38 | LDMGAPFAQGAFGKLYRGTYNDEDVAIKLLEKPENDPERAQLMEQQFVQEVMMMLSTLRHPNIVRFIGACRKSIVWCIIIEYAKGGSV<br>RQFLARRQNKSVPLGLAVKQALDVARGMAYVHALRFHRLKSDNLLISADKSIKIADFGVARIEVQTEGMPETGTYRWMAPEMI<br>HRPYDQKVDVYSFGIVLWELITGMLPFTNMATAVQAFAFVNVNRSRPAIPQDCVDSLKIMTCCWDANPEVRSFAEIVVML                 |
| OsMAPKKK39 | LEELRELGSFTGTVYHGKWRGSDVAIKRINDRCFAGKASEQERMRTDFWNEADKLASLHHPNVVAFYGVVLDGPGGSVATVTEY<br>MANGSLRQALQRHEKIFDRRRRLIAMDVAFGMEYLHEKNIVHFDLKSDNLLVNLDRPQHPICKVGDGLSKVKCQTLISGGVRGTL<br>PWMAPELLNGSSSLVSEKVDVFSFGIVMWELLTGEEPYAELHYGAIIGGIVNNTLRPPVPESCDPRWRSLMEQCWSSEPSERPSFTEV<br>KRL    |
| OsMAPKKK40 | LTIGTRVIGIFFGEVFRGIWNGTDVAIKVFLEQDLTTENMEDFCNEIYILSRLRHPNVILFLGACMPPHLSMVTEYMEMGSLYYLIHM<br>SGQKKLSWRRRLKIVRDCRGLMCIHRMKIVHRDLKSANCLVKNKHWTVKICDFGLSRVMTDSPMTDNSSAGTPEWMAPELIRNEP<br>TEKCDIFSLGVIMWELCTLSRPWDGIPVQVYVTVANEGSRLEIPEGLKLIADCWAEPQDRPSCQEILTRLL                        |
| OsMAPKKK41 | LEELQELGSFTGTVYHGKWRGSDVAIKRINDRCFAGKPEQDKMRNDFWNEASKLADLHHPNVVAFYGVVLDGPGGSVATVTEY<br>VNGSLRTALLKNAKTLDKRRLIAMDVAFGMEYLHNKNIVHFDLKSDNLLVNLDRPQHPICKVGDGLSKVKCQTLISGGVRGTL<br>WMAPELLNGSSSLVSEKVDVFSFGIVLWELLTGEEPYADLHYGVIIGGIVSNTLRPAVPDSCDPEWRSLMEQCWSTEPSEPTFTEIAG<br>RL        |
| OsMAPKKK42 | LFIGSKIGEGAHGKVYKGYGEQIVAIKVLNNGTTPPEEKATLEARFIREVNMCKVKHDNLVKFIGACKEPLMVIVSELLPGMSLKNY<br>LNSLRPSQLDIHTAIGYALDIAHAMECLHANGIHRDLKPDNLLLTANRKKLKLTDGFLAREETVTEMMAETGTYRWMAPELYSTV<br>LQRGEKKHYTNKVDVYSFGIVLWELLTNKMPFEGMSNLQAAAYAAAFKQARPLPEETPQELVFVQSCWVEDPAMRPSFSQIIRMLD<br>AFL   |
| OsMAPKKK43 | LDIQEKVASGTYGDLRGTYFGEDVAIKVLKSDRLNENMQEEFNEEVFIMRKIRHKNIVRFLGACTKSPTLCIVTEFMKNGSVYDYHL<br>KRKGSFKLPSLLKAAVDISKGMNYLHQNKIHRDLKTANLLMDEHELIKVADFGVARVKAESGIMTAETGTYRWMAPEVIEHKPYDS<br>KADVFSFGVVLWELLTGKIPHEFLTPLQAAIGVVQEGLRPVPKATDPKLLALLESCWQQNAVNRPDFVQILQKL                     |
| OsMAPKKK44 | ITVGTTRVIGIFFGEVFRGIWNGTDVAIKLFLEQDLTTENMEDFCNEISILSRLRHPNVILFLGACMKPPHLSLVTEYMEMGSLYYLIH<br>GQKGLSWRRRLKMLRDCRGLMCMHRLKIVHRDLKSANCLVKNHWA VKLDFGLSRVMSNSAMNDNSSAGTPEWMAPELIRNEP<br>FTEKCDIFSLGVIMWELCTLSRPWEGIPSVQVYVNVANEGARLEIPDGLPLSLIADCWAEPDKRPGCQEILTRLL                     |
| OsMAPKKK45 | LFIGNKFASGANSRIYRGIYQRAVAVKVMRIPERDEARRAVLEDQFNSEVAFLSRLYHPNIVQFIAACKKPPVYCIITEYMSQGLRM<br>YLNKDKPYSLSSETILKALDISRGMAYLHAQVVIHRDLKSNLNDNDEMVRKVADFGTSCLETACQATKGNKGTYRWMAPEMTKE<br>KPYTRKVDVYSFGIVLWELLTCLLPFGMTPVQAAAYAASEKNLRPLSTSCSPVNLNLIKRCWSANPARRPEFSYIVSVL                  |
| OsMAPKKK46 | LRYREIIGSGSSKTVYKAFDAVDGIEVAWGKVEINERIMGSSKELQRLRTEIQLLQSLQHKHILKLYASWVDNTRRTVNIIVTELFTSGN<br>LREYRTKHKKVDKAMRRWAKQILTGLEYLHSQKPIIHRDLKCDNIFVNGNHGKVKIGDFGLAMVMQQRKTRSIQGTIEFMAPEL<br>GENYNELVDIYSGFMCMLEMVTCECPYSECKGFIQYKITEGVKPAALSKVKDAEVRGFIESCLASVSDRPLASELLKSPFL             |
| OsMAPKKK47 | GRFNEILGKSSKIVYRGFDEWRGVEVAWNQVRLRDVVRGGELERFYGEVHLLAALRHRRGIVRLHAYVWDAPRRALNFVTELFVS<br>GTLRQYRERHRRVSAAVRRWCAQILDGLAYLHAHSPPIIHRDLKCDNIFVNGNQGEVKIGDLGLAAFRGGGHARCVTGPEFMAPE<br>VYDESYDELADVYSGFMCVLEMVTLDYPSSECSNPIQYKRVISGIKPAALYRVS DPVVRQFIERCLAPAARRPAARELLDDPFL             |
| OsMAPKKK48 | LEIRTKFATGRHSRVYSGRYAARDVAIKMVSQPEEDAALAELERFQFASEVALLRLRHPNIIISFVAACKKPPVFCIITEYMSQGLRM<br>YLHQEPHVSPIELVLKLSLEIARGMSYLHSQILHRDLKSENILLDGDMSVKVADFGISCLSCQSGKGFVTGTYRWMAPEMIKK<br>HTRKVDVYSFGIVLWELLTALVPFSEMTPEQAAVAVALKNARPLPPSPVAISHLITQCWATNPDPRRQFDDIVAIL                     |
| OsMAPKKK49 | LLIGQRFASGAYSRLFHGIYKEQPVAVKFIRQPEDEEDAELAAKLEKQFTAETILARLHHRNVIKLIGACNAPPVFCVITEFLCGGSLR<br>AFLRKLQRQKLEKIICIALDIAHGLEIYHSQRVIHRDVKPENILFDGECCAKVVDVDFGVAEEVYCNLEDDPGTYRWMAPEMYK<br>PYGRKVDVYSFGLVWELFSGSIPYEEMTPLQAAFAFVNVNLRPVVSPSCPAQLRLIEQCWSCQPEKRPEFSQVQVIL                  |
| OsMAPKKK50 | GRLSEVLGKGAMKTVYRGFDELRGVEVAWNQATISDVLRTPDALHRMYAEVSLADLRHDAIIAFHASWVHPSRRTFNFITELFSSGT<br>LRSYRLRYPRVSRRAVAAWARAILRGLAYLHSGVVIHRDLKCDNIFVNGHLGQVKIGDLGLAAVLRGCTSARSVIGTPEFMAPEMYD<br>ECYGVGVVDVYSFGMCMLEMLTNEYPYSECDNPAQIYKVKVTAGKLPDAFYLLTDADARRFIGRCLVDAHRPSAEELLLDPFL           |
| OsMAPKKK51 | LLIGHRFASGAHSLRFHGIYKEQPVAVKFIRQPEDEEDAELAAQLEKQFNTEVTTLSRLNHPNVIKLIGACSSPPVFCVITEFLSGGSLR<br>FLHKQEHKSLPLEKIISGLDIANGIGYIHSQVGVHRDVKPENIIFDSEFCAKIVDFGSCIEAECDPLANDTGTFRWMAPEMMKHKPYG<br>RKVDVYSFGLILWEMFTGSPYEDLNPFQAAFAVFDKNERPVPSSCAPLRLIEQCWASQPKRPEFWQIVQIL                   |
| OsMAPKKK52 | IRYDEIVGSGAVKTVYKAFDKLEGVEVAWSQRIDDSVMGSSKMKQLNTEIQLLKTLLKHKNIEKMFASVWDGEEKTVNIITELFTSG<br>SLTQYRRKHKKNVNMKAMKRWAIQILTGLEYLHSQKPAIHRDLKCDNIFVNGNHGKVKIGDFGLATFMQQQKSIKGTLEFMAPELL<br>GHYNELVDIYSGFMCMLEMVTCEYPYSECQGMAMHIFKIDEGKPAAFYKIKDAEVRSEFIENCLAPVENRMSATELLKSSFL             |

OsMAPKKK53 GRLSEVLGKGAMKTVYRGFDELRGVEVAWNQATISDVLRTPDALHRMYAEVSSLADLRHDAIIAFHASVWHPSTRRTFNITELFSSGT  
LRSYRLRYPRVSRRAVAAWARAILRGLAYLHARGVIHRDLKCDNIFVNGHLGQVKIGDLGLAAVLRGCASARSVIGTPEFMAPEMYD  
ECYGVGVDVYSFGMCMLEMLTNEYYPYSECNDPAQIYKKVTAGKLPDAFYRLTDADARRFIGRCLVDAHRPSAEELLLDPFL

OsMAPKKK54 LEDLREIGSGSFGTVFHGRWKGTDAIKRIKNSCFMYPSSQADKLITFEWREAAIISKLHHPNVLALYGINNPGGTLATVTEFMING  
SLKKVLLHKNKYLDWRKRIMVAKDAAIGMEYLHSHKDIVHFDLKCDNLLVNIKDPSRPICKVADFGLSKMKQATLVSGGMRGTLPW  
MAPELLTMSGTKVSEKIDVYSFGIVMWEILTGEDPYDGMHYGGVIGILSNTLRPLVPTSCNLEWRKLMEQCWSTEPERRPSFAEVAT  
RL

OsMAPKKK55 WTRVRTLGRGASGAVVSLAADDRSGALFAVKSAAAAAAEQLVREGRILSGLRSPHVLPCLGFRAEAGGECQLFLEFAPGGSLADV  
ARSGRLEDECAIRAYAADVARGLAYLHGMSLVHGDVKGRNVVVGADGRAKIADFGCARTVGSDRPIGGTAPFMAPEVARGEEQEP  
AADVWALGCTVIEMATGRAPWSDMEDILSAVRRIGYTDVAVEPPEWLSAEAKDFLARCFARNPRERWTSSQLLEHPFL

OsMAPKKK56 GRYTEVLGKGAFKTVYKAFDQLEGLEVAWNQIKVGDILRNDDLERLRSEVRLKTLKHKNIKFYNSWLDKNNNINIFITEVFTSGT  
LRQYRIKHKKVDVRLKWSRQILSGLVYLHSHDPPVIHRDLKCDNIFVNGNQGEVKIGDLGLATILDNARSASHIIGTPEFMAPELYD  
EYNELVDIYAFGMCLLELVTFEYPYCECSNAAQIYKKVSDGKPSLAKIEDPEVRFIEKCIKASQRLSAQELLMDFL

OsMAPKKK57 LTRVRTLGRGASGAVVSLFAAGDDELLAVKSAAGPAGAAQLRREAGILASLCSPHVLPFCFGFVAVAGGEYGLLLEFAPGGSLADEVA  
RNGGRLEEDDVRAVYADVASGLAYLHGVMVHGDVKGRNVVIGANGRAKLADFGCARRADSAGPIGGTAPFMAPEVARGEEQGP  
AADVWALGCTVIEMATGRAPWSGVDDVVAVRLIGFTDAVPEPPEWLSPEANDFLDKCLRRRAGERWTAQQLEHPFL

OsMAPKKK58 LLLGPKIASGNSRIHRGMYGEQPVAVKIMHAPVGDVVVQVREMEAQFDAEVSSLRSLRHPNVVRLVGVCREPEVYWIITELMR  
RGTL SAYLHGREPYSLPPEITIVRLALDVARGMEYLHARGVVRHDLKPENMLLDGGGRVKVADLGTSCLEATCRGDKCSSKAGTFRW  
MAPEMHDKRCNRKVDVYSFGLVLWELTCLVPFQNLSPVQVAYSVCDRDARPPSPSPAINSLIKRCWSTEPARRPEFKQIVSVL

OsMAPKKK59 LEIGHVVEHGDHGTFRGKYYSQDVAVKLLDWGAEGDSSDQIAHFRTSLKEVVAWHEFNHPNITKFIGASMGTTNLNIPKDIPDHS  
SRKGARTDLPDRACCVVEYLTGGTLKQHLIKHYRKNKLLYEEVVRLLALDLARGLSFLHSHKIVHRDVKSENMLLDPQLNLKIADF  
GVARLVEAQDPKDLTRTTGTLGYMAPEVLGDKPYNRKCDVYSFGICLWETYCCDMPYGPYSDLSFADFSSVVHKNLRPEIPDCPS  
AMASIMRRCWDANPEVRPEMEEVVRLES

OsMAPKKK60 LDIQNQVAHGTFGVVYRGTYDGHDAVKVLDWQEGQESTAKHREAFEKEVAVWQKLDHPNVTKFVGASMGTSHLKIPSAKAESR  
SSSVGGGSAGGGGQRCVVVEYQHGGTLKTLKYHRDKLPYKVVQLALDMARGLRYLHGEKIVHRDVKAENMLLDRKTKL  
IADFGVARVEAGADGDDMTGQTGTIGYMAPEVLQGRAYDHKCDVYSFGVLLWETYCCAMAYPNYSLADISYHVDKLGIRPDIPRC  
PKAMADIMARCWDANPDNRPEMSEVVALL

OsMAPKKK61 LLVGHKFAFGASYRSLYKGLYDDKPVAIKFIQPDNDNGKMAAKLEKQYNSVNLSHLYHKNVIKLVAAKYCPPVFIITEFLPGG  
SLRSYLNSTEHHPLEKIISIALDVACGLEIYHSQGVVHRDIKPENILFDENFCVKIADFGIACEESMCDVLVEDEGTYRWMAPEMIKR  
KAYNRKVDVYSFGLLLWEMISGRIPFDDLTPQAAYAVATRHRARPVPEPCPMALRPLIEQCCSLQPEKRPDFWQIVKIL

OsMAPKKK62 LRRLRTLGRGASGAVVWLASDDASGELLAVKSAAGEGGAELRREGRVMSGLCSPHIVPCLGSRAAAGGEYQLFLEFAPGGSLADE  
AARSGRRAERAISAYAADVARALAYLHGNSLVHGDVKARNIMVVGADGRAKLADFGCARRTDSERPIGGTAPFMAPEVARGEEQGP  
AADVWALGCTVIEMATGRVPWSDMDDVFAVHRIGYTDVAVEPPEWLSPEAKNLSRCFTRNPSDRPTAAQLLEHPFL

OsMAPKKK63 WTRLRTLGRGASGAVVSLAEDGASGELFAVKTAATAAAEAAMLRREGRMMSGLSSPHVVPICGGGDGPDGSYNLFLFAPGGSLANEV  
ARDGGRLEERAIRVYAADVLRGLTYLHGMSLVHGDVKADNIVIGVDGLAKLADFGCAKTMDSERPVSPTAFMAPEVARGEEQGA  
ADVWALGCTVIEMATGRAPWSDMDDVLAAVHRIGYTDVAVEPVPWLSAEAKDFLAMCFARNAGDRSTAAQLLEHPFV

OsMAPKKK64 GRYADVLGLGSVKKVYRGFDQEEGIEVAWNRVRLRALADRDPAVERLHAEVRLRLSLHHEHIGFHKVWLDLDRDAGVLFNITEVCT  
SGSLREYRDRHRHVSVKALKKWARQILLGLDHLHTDPCIHRDLNCSNVFINGNTGQVKIGDLGLAAIVDKTHVAHTILGTPEFMAP  
ELYTETYTESVDIYSYGMCVLEMVTEMPTAECDSVQIYHSVTRGVPPAALKRIRDPELRAFIERCIGQPRNRPASAEELLRDPFF

OsMAPKKK65 FSKAVIIGKGSFGEILKANWRGTPIAVKRILPSLSDRLVIQDFKHEVNLLIKLRHPNIVQFLGAVTETKPLMLVTEFLRGGDLHQYLKE  
K GALAPATAVNFALDIARGMAYLHNEPNVVIHRDLKPRNILLVNSAANHLKVGDFGLSKIIKAQHADVYKMTGETGSYRYMAPEV  
FKHRKYDKKVDVFSFAMILYEMLEGDPPFSNYEPYEAACYVGEHRPPFRSKGFTNELKELIELCSWSDIHLRPSFLEILKRL

OsMAPKKK66 WTRLRSIGHGASGATVSLAADDASGELFVVKSGADAATAARQQLRREWSVMSGLSSPHVLRCLGFVQAAAGAGGEHQLLLEYAP  
GGSLADVVARNGDRLDESAFRAYAADVLRGLDYLHEKLVHGDVKGSNVLVADGRAKLADFGCARVMPGGSKQPVLLGGTAPF  
MAPEVARGEEQGAADVWALGCTVIEMATGRAPWSDMDDVLAALRMIGYTDVAPDLPPWLSPEAKDFLRRCMQRRAGDRPTAAQ  
LLQHPFV

OsMAPKKK67 WTRLRSVGRGASGAVVSLAANDVSGELFVVKISAGEGAARQQLRREWSVMSGLSSPHVLRCLGFVQASGGCGGGEHQFLFLEYAPGGS  
LADVVARNGGRLDEGAVRTYAADVLRGLDYLHGKLVHGDVKGSNVLVADGRAKLADFGCARVMPGGSKQPVLLGGTAPFMA  
PEVARGEEQGLAADVWALGCTVIEMATGRAPWSDMDNVLPAHKGITYDAVPPDLPRWLSPEAKDFLRGCLQRRAGDRPTAAQLLQ  
HPFI

OsMAPKKK68 LSIRSVVAQGYHGTFRADYGGHDVAVKVLDWREDGYSTPEQIAHLRASLADLAAVWHSFEHPNVARFFGASMGTTDLNIPAAASA  
AGGGEQRNTGEKPPADRACCVVEFLGGGTLKYLIEHYRSKLPYGEVVRLLALSARGLSFLHANNIVHRDVKTENMLFLGGGGG  
DLKIADFGVARVEARDPREMTGATGTGYMAPEVLVGPYNRKCDVYSFGICLWETYCCEMPFTFGLSVAEASAAVAQRGMRPPIP  
PCCPPAMARVMARCWDADPAARPEMEEVVRMLEAL

OsMAPKKK69 WTRVRTLGRGASGAEVFLAADDASGELFAVKSVAAGAAALRREQVMAGLSSPHVVPICGGRVGRDGSYQMFLEFAPGGSLADV  
AARCGRMEECAVGEYAVDVARGLAYLHGMSLVHGDVKARNVIGGDGRAKLADFGCARWADSGRPIGGTAPFMAPEVARGEEQ  
SPAADVWALGCTVIEMATGRAPWSDMDDVLAAVHRIGYTEAVPEVPVWLSADAKDFLARCLQRRPIDRSTAAQLLEHPFV

OsMAPKKK70 LRRVRTLGRGASGAVVWLASDDDSGELMAVKSASAGGAAAQLRREGRVLSGLCSPHIVPCLGSRAAAGGEYQLFLEFAPGGSLADE

|            |                                                                                                                                                                                                                                                                                     |
|------------|-------------------------------------------------------------------------------------------------------------------------------------------------------------------------------------------------------------------------------------------------------------------------------------|
|            | AARNGGCLPEPAIRAYAADVARGLAYLHGNSLVHGDVKARNVIGSDGRARLTDFGCARVMSAGPIGGTPAFMAPEVARGEEQGP<br>AADVWALGCTIEMATGRAPWSDMDDILAAVHRIGYTNAVPEVPGWLSAEAKDFLDGCFERNASDRSTAAQLLEHPFV                                                                                                               |
| OsMAPKKK71 | WRRGPVIGRGATATVSIATDRRTGGVFVAVKSVVVARAGALRREQMLSALASPFVPCVGSVSAAVDGGSGGACYDLFLEYAPGGS<br>LADEIKRCGGRCCEPLIRSRVGDVLRGLAYVHAAGIAHCDVKGRNVLVGADGRAMLADFGCARWMAAEDCNAGGVTRGTPMFLA<br>PEAARGEAQGTAAADIWALGCTVIEMATGGAPWPRFADPVAALHHVAHSVDVPESPAWFSAEKDFLARCLIRDPKRWTAEQLEH<br>PFV        |
| OsMAPKKK72 | FTNGNGISKGTFRKATWRGILVAVKKLDDDLIMDENKVQAFRDELVDLQLIRHPNVVQFLGAVTQSSPMMIVMEFMPKGDLRKHL<br>RKGALPSYAVKLALDIARGMNYLHEHKPQAIHRDLEPSNILRDDTGHLKVADFDLCKMLKWRKVRREEKAVTSPGNACRYVAPE<br>VLRNEEYDTKVDVFSFALILQEMIEGCLPFYDKKNEIEKAHNSKERPPFRAPPKHYAYGLRELIEQCWSENASRPDFRTIIEQLSYI            |
| OsMAPKKK73 | WVRGKCVGRGAFGAVHVAVDVDRATGRAFAVKSVEAKGGAPAAAMACLESEIRILRRLSSPYVVEYLGDDGDAATTRNLHMELVPGG<br>SAAAAAAMGGLGERGARGVRRVAAALRYLHDVAGVVHGDVKGRNVLVGCDGDGRGAKLADFGAARLVSDAAVSRGPRGTPA<br>WMAPEVARGGAPTPASDVWSLGTAVELITGKRPSWSELGGASEVGELLFLIGFGGKRPELPACASDSCRDFLDKCLRRDAGERWTCD<br>QLLRHPFL |
| OsMAPKKK74 | FKKGDEVVKGVYQVAKWNGTKVHVHVKILDRECYCDQEVINSFRHELTVLEKVRHPNVVQFVAVTQNIIPMMIIEYLPNGDLSSCIPR<br>KGKLGQKVLKYGLEIARGMTYLHQCKPDPIIHCDLKPKNIFLDSGGQLKIAGFGLTRLSKISPRVKLADHESMVDVFSHYTAPELYR<br>NEIFDASVDAFSFGFILYEMVEGTHTVHGKSSEESGHTIRYDGMRPSLKNKLRGYPPDFKALIEECWDTQGIARPTFSEIIRL          |
| OsMAPKKK75 | FRRGEEVTKGHYVARWYVYVVKILDKDSFSDANSINEFKHELTLEKARHPNLVQFVAVTQNVPMIIVSEYHQKGLASYLET<br>KGRLQPYKAIRFSLDIARGLNYLHECKPEPIIHGNLSTKSIVRDEGKLVAGFGSRSLIKVSEDNPQMDQTTSKFNSVYTAPEMYRNG<br>TFDRSVDVFAFGLILYEMIEGTHAFHPKPPEEAAKMICLEGMRPPFKNKPKYYPDDLRELIQECWDPTPSVRPTFEEIIVRLNKISTSF           |
