# Supplementary material for: Genome-wide exploration of the molecular evolution and regulatory network of mitogen-activated protein kinase cascades upon multiple stresses in Brachypodium distachyon
Source: PubMed Central journal article supplement (PMC4404688; doi:10.1186/s12864-015-1452-1), 2015-03-24
Supplement: 12864_2015_1452_MOESM5_ESM.pdf [file 12864_2015_1452_MOESM5_ESM.pdf]

**Additional file 5. Orthologs of MAPK cascade kinase genes among *B. distachyon*, *A. thaliana* and *O. sativa***

| <i>B. distachyon</i> genes |              | <i>O. sativa</i> genes |                | <i>Arabidopsis</i> genes |            |           |
|----------------------------|--------------|------------------------|----------------|--------------------------|------------|-----------|
| gene name                  | gene model   | gene name              | gene model     | gene name                | gene model |           |
| BdMPK3                     | Bradi1g65810 | OsMPK3                 | LOC_Os03g17700 | AtMPK3                   | At3g45640  |           |
| BdMPK4                     | Bradi3g32000 | OsMPK4                 | LOC_Os10g38950 | AtMPK4                   | At4g01370  |           |
| BdMPK6                     | Bradi1g49100 | OsMPK6                 | LOC_Os06g06090 | AtMPK6                   | At2g43790  |           |
| BdMPK7-1                   | Bradi1g34030 | OsMPK7                 | LOC_Os06g48590 | N/A                      | N/A        |           |
| BdMPK7-2                   | Bradi4g24912 |                        |                | AtMPK4                   | At4g01370  |           |
| BdMPK11                    | Bradi3g16560 | OsMPK2                 | LOC_Os08g06060 | AtMPK5                   | At4g11330  |           |
|                            |              |                        |                | AtMPK11                  | At1g01560  |           |
| BdMPK14                    | Bradi3g03780 | OsMPK14                | LOC_Os02g05480 | AtMPK1                   | At1g10210  |           |
|                            |              |                        |                | AtMAPK2                  | At1g59580  |           |
| MAPK                       | BdMPK16      | Bradi2g36470           | OsMPK15        | LOC_Os05g05160           | AtMPK16    | At5g19010 |
|                            |              |                        | OsMPK16        | LOC_Os11g17080           |            |           |
| BdMPK17                    | Bradi1g34700 |                        | OsMPK17-1      | LOC_Os06g49430           | N/A        | N/A       |
|                            |              |                        | OsMPK17-2      | LOC_Os02g04230           |            |           |
| BdMPK20-1                  | Bradi2g44350 | OsMPK20-1              | LOC_Os01g43910 | N/A                      | N/A        |           |
| BdMPK20-2                  | Bradi2g15317 | OsMPK20-2              | LOC_Os05g50560 | N/A                      | N/A        |           |
| BdMPK20-3                  | Bradi1g41780 | OsMPK20-3              | LOC_Os06g26340 | AtMPK20                  | At2g42880  |           |
| BdMPK20-4                  | Bradi2g45870 | OsMPK20-4              | LOC_Os01g47530 | N/A                      | N/A        |           |
| BdMPK20-5                  | Bradi2g16337 | OsMPK20-5              | LOC_Os05g49140 | N/A                      | N/A        |           |
| BdMPK21-1                  | Bradi2g15620 | OsMPK21-1              | LOC_Os05g50120 | N/A                      | N/A        |           |
| BdMPK21-2                  | Bradi2g45010 | OsMPK21-2              | LOC_Os01g45620 | N/A                      | N/A        |           |
| MAPKK                      | BdMKK1       | Bradi1g51000           | OsMKK1         | LOC_Os06g05520           | AtMKK1     | At4g26070 |
|                            |              |                        |                |                          | AtMKK2     | At4g29810 |
|                            | BdMKK3-1     | Bradi4g39490           |                |                          |            |           |
|                            | BdMKK3-2     | Bradi1g41860           | OsMKK3         | LOC_Os06g27890           | AtMKK3     | At5g40440 |
|                            | BdMKK3-3     | Bradi3g11260           |                |                          |            |           |
|                            | BdMKK4       | Bradi3g53650           | OsMKK4         | LOC_Os02g54600           | AtMKK4     | At1g51660 |
|                            | BdMKK5       | Bradi1g46880           | OsMKK5         | LOC_Os06g09180           | AtMKK5     | At3g21220 |
|                            | BdMKK6       | Bradi1g75150           | OsMKK6         | LOC_Os01g32660           | AtMKK6     | At5g56580 |
|                            | BdMKK10-1    | Bradi1g11525           | OsMKK10-3      | LOC_Os03g50550           | N/A        | N/A       |
|                            | BdMKK10-2    | Bradi1g69400           | OsMKK10-2      | LOC_Os03g12390           | N/A        | N/A       |
| BdMKK10-3                  | Bradi1g10800 | OsMKK10-3              | LOC_Os03g50550 | N/A                      | N/A        |           |
| MAPKKK                     | BdMAPKKK1    | Bradi5g24870           | OsMAPKKK24     | LOC_Os04g56530           | AtMAPKKK6  | At3g07980 |
|                            |              |                        |                |                          | AtMAPKKK7  | At3g13530 |
|                            | BdMAPKKK2    | Bradi1g28950           | OsMAPKKK21     | LOC_Os07g25680           | N/A        | N/A       |
|                            | BdMAPKKK3    | Bradi3g60210           | OsMAPKKK35     | LOC_Os02g54510           | AtRaf35    | At5g57610 |
|                            | BdMAPKKK4    | Bradi1g47570           | OsMAPKKK39     | LOC_Os06g08280           | N/A        | N/A       |
| BdMAPKKK5                  | Bradi3g59510 | OsMAPKKK6              | LOC_Os02g50970 | AtRaf5                   | At1g73660  |           |

|            |              |            |                |           |           |
|------------|--------------|------------|----------------|-----------|-----------|
| BdMAPKKK6  | Bradi1g74480 | OsMAPKKK1  | LOC_Os03g06410 | AtEDR1    | At1g08720 |
| BdMAPKKK7  | Bradi1g45040 | OsMAPKKK7  | LOC_Os06g12590 | AtRaf4    | At1g18160 |
| BdMAPKKK8  | Bradi5g18180 | OsMAPKKK10 | LOC_Os04g47240 | AtMAPKKK4 | At1g63700 |
| BdMAPKKK9  | Bradi1g30720 | OsMAPKKK41 | LOC_Os06g43840 | AtRaf42   | At3g46920 |
| BdMAPKKK10 | Bradi2g46340 | OsMAPKKK40 | LOC_Os01g48330 | AtRaf15   | At3g58640 |
| BdMAPKKK11 | Bradi3g51380 | OsMAPKKK9  | LOC_Os02g44642 | AtMAPKKK4 | At1g63700 |
| BdMAPKKK12 | Bradi3g27120 | OsMAPKKK2  | LOC_Os10g29540 | AtEDR1    | At1g08720 |
| BdMAPKKK13 | Bradi3g09170 | OsMAPKKK44 | LOC_Os02g14530 | AtRaf13   | At2g31010 |
| BdMAPKKK14 | Bradi3g08260 | OsMAPKKK4  | LOC_Os02g12810 | AtRaf3    | At5g11850 |
| BdMAPKKK15 | Bradi4g04470 | OsMAPKKK5  | LOC_Os12g37570 | N/A       | N/A       |
| BdMAPKKK16 | Bradi1g23970 | OsMAPKKK20 | LOC_Os07g38530 | AtZIK4    | AT3G04910 |
| BdMAPKKK17 | Bradi4g38400 | OsMAPKKK12 | LOC_Os09g39320 | AtCTR1    | At5g03730 |
| BdMAPKKK18 | Bradi3g44710 | OsMAPKKK3  | LOC_Os02g32610 | AtCTR1    | At5g03730 |
| BdMAPKKK19 | Bradi1g07650 | OsMAPKKK18 | LOC_Os03g55560 | AtMAPKKK5 | At5g66850 |
| BdMAPKKK20 | Bradi5g21330 | OsMAPKKK14 | LOC_Os04g52140 | AtRaf6    | At4g24480 |
| BdMAPKKK21 | Bradi4g36880 | OsMAPKKK17 | LOC_Os09g37230 | AtRaf30   | At4g38470 |
| BdMAPKKK22 | Bradi2g39350 | OsMAPKKK36 | LOC_Os05g01780 | AtZIK11   | AT3G48260 |
|            |              | OsMAPKKK56 | LOC_Os05g01780 |           |           |
| BdMAPKKK23 | Bradi4g29500 | OsMAPKKK13 | LOC_Os09g21510 | N/A       | N/A       |
| BdMAPKKK24 | Bradi1g60340 | OsMAPKKK54 | LOC_Os03g28300 | N/A       | N/A       |
| BdMAPKKK25 | Bradi3g36080 | OsMAPKKK15 | LOC_Os08g32600 | N/A       | N/A       |
| BdMAPKKK26 | Bradi1g58810 | OsMAPKKK11 | LOC_Os07g02780 | AtMAPKKK5 | At5g66850 |
| BdMAPKKK27 | Bradi4g22760 | OsMAPKKK8  | LOC_Os11g10100 | AtMAPKKK3 | At1g53570 |
| BdMAPKKK28 | Bradi3g51460 | OsMAPKKK29 | LOC_Os02g45130 | N/A       | N/A       |
| BdMAPKKK29 | Bradi1g10970 | OsMAPKKK22 | LOC_Os03g49640 | N/A       | N/A       |
| BdMAPKKK30 | Bradi3g01850 | OsMAPKKK30 | LOC_Os02g02780 | N/A       | N/A       |
| BdMAPKKK31 | Bradi2g06260 | OsMAPKKK61 | LOC_Os01g10450 | AtRaf36   | At5g58950 |
| BdMAPKKK32 | Bradi2g19590 | OsMAPKKK49 | LOC_Os05g44290 | AtRaf43   | At3g46930 |
| BdMAPKKK33 | Bradi3g48360 | OsMAPKKK75 | LOC_Os02g39560 | N/A       | N/A       |
| BdMAPKKK34 | Bradi1g67400 | OsMAPKKK28 | LOC_Os03g15570 | N/A       | N/A       |
| BdMAPKKK35 | Bradi2g49700 | OsMAPKKK51 | LOC_Os01g54350 | N/A       | N/A       |
| BdMAPKKK36 | Bradi2g57470 | OsMAPKKK74 | LOC_Os01g66860 | N/A       | N/A       |
| BdMAPKKK37 | Bradi3g05520 | OsMAPKKK33 | LOC_Os02g07790 | AtRaf22   | At2g24360 |
| BdMAPKKK38 | Bradi3g18150 | OsMAPKKK32 | LOC_Os08g12750 | AtRaf28   | At4g31170 |
| BdMAPKKK39 | Bradi1g28110 | OsMAPKKK26 | LOC_Os07g29330 | N/A       | N/A       |
| BdMAPKKK40 | Bradi2g49790 | OsMAPKKK72 | LOC_Os01g54480 | N/A       | N/A       |
| BdMAPKKK41 | Bradi1g14000 | OsMAPKKK27 | LOC_Os03g43760 | N/A       | N/A       |
| BdMAPKKK42 | Bradi1g35350 | OsMAPKKK45 | LOC_Os06g43030 | AtRaf19   | At1g62400 |
| BdMAPKKK43 | Bradi1g04080 | OsMAPKKK42 | LOC_Os03g60150 | AtRaf31   | At5g01850 |
| BdMAPKKK44 | Bradi5g10670 | OsMAPKKK16 | LOC_Os04g35700 | N/A       | N/A       |
| BdMAPKKK45 | Bradi3g47600 | OsMAPKKK25 | LOC_Os02g38080 | AtRaf32   | At5g40540 |
|            |              |            |                | AtRaf34   | At5g50180 |

|            |              |            |                |            |           |
|------------|--------------|------------|----------------|------------|-----------|
| BdMAPKKK46 | Bradi2g44910 |            |                | AtRaf41    | At3g27560 |
| BdMAPKKK47 | Bradi2g15560 | OsMAPKKK31 | LOC_Os01g45380 | AtRaf33    | At5g50000 |
| BdMAPKKK48 | Bradi2g00670 | OsMAPKKK48 | LOC_Os01g01740 | AtRaf38    | At3g01490 |
| BdMAPKKK49 | Bradi1g20390 | OsMAPKKK65 | LOC_Os07g43900 | AtRaf19    | At1g62400 |
| BdMAPKKK50 | Bradi4g44430 | OsMAPKKK50 | LOC_Os12g02250 | AtRaf17    | At1g14000 |
|            |              | OsMAPKKK53 | LOC_Os11g02305 | AtZIK1     | AT3G51630 |
| BdMAPKKK51 | Bradi2g47510 | OsMAPKKK62 | LOC_Os01g50420 | AtZIK2     | AT5G58350 |
| BdMAPKKK52 | Bradi2g47480 | OsMAPKKK63 | LOC_Os01g50370 | N/A        | N/A       |
| BdMAPKKK53 | Bradi2g47490 | OsMAPKKK55 | LOC_Os01g50400 | N/A        | N/A       |
| BdMAPKKK54 | Bradi1g23320 | OsMAPKKK64 | LOC_Os07g39520 | N/A        | N/A       |
| BdMAPKKK55 | Bradi2g47500 | OsMAPKKK70 | LOC_Os01g50410 | AtZIK8     | AT5G55560 |
| BdMAPKKK56 | Bradi4g41940 | OsMAPKKK52 | LOC_Os12g06490 | N/A        | N/A       |
| BdMAPKKK57 | Bradi3g10890 | OsMAPKKK71 | LOC_Os02g21700 | N/A        | N/A       |
| BdMAPKKK59 | Bradi2g17830 | OsMAPKKK57 | LOC_Os05g46750 | N/A        | N/A       |
| BdMAPKKK60 | Bradi1g65500 | OsMAPKKK73 | LOC_Os03g18170 | AtMAPKKK13 | AT1G07150 |
|            |              |            |                | AtMAPKKK14 | AT2G30040 |
| BdMAPKKK64 | Bradi4g02900 | OsMAPKKK23 | LOC_Os12g40279 | AtRaf40    | At3g24720 |
| BdMAPKKK66 | Bradi1g14010 | OsMAPKKK27 | LOC_Os03g43760 | N/A        | N/A       |
| BdMAPKKK67 | Bradi3g45790 | OsMAPKKK19 | LOC_Os02g35010 | N/A        | N/A       |

---
