# Supplementary material for: Genome-wide exploration of the molecular evolution and regulatory network of mitogen-activated protein kinase cascades upon multiple stresses in Brachypodium distachyon
Source: PubMed Central journal article supplement (PMC4404688; doi:10.1186/s12864-015-1452-1), 2015-03-24
Supplement: 12864_2015_1452_MOESM7_ESM.pdf [file 12864_2015_1452_MOESM7_ESM.pdf]

**Additional file 7 The duplicated genes in *O. sativa*, *A. thaliana* and *B. distachyon* chromosomes.**

| Gene      |              |                   | Syntenic regions |                |                   |
|-----------|--------------|-------------------|------------------|----------------|-------------------|
| gene name | gene model   | location          | gene name        | gene model     | location          |
| BdMPK3    | Bradi1g65810 | 64739946-64742370 | AtMPK3           | At3g45640      | 16756918-16758476 |
| BdMPK3    | Bradi1g65810 | 64739946-64742370 | OsMPK3           | LOC_Os03g17700 | 9847700-9850473   |
| BdMPK4    | Bradi3g32000 | 34209148-34213422 | OsMPK4           | LOC_Os10g38950 | 20684835-20687729 |
| BdMPK4    | Bradi3g32000 | 34209262-34212267 | AtMPK11          | At1g01560      | 202345-204189     |
| BdMPK6    | Bradi1g49100 | 47836748-47843578 | AtMPK6           | AT2G43790      | 18138477-18140693 |
| BdMPK6    | Bradi1g49100 | 47836748-47843578 | OsMPK6           | LOC_Os06g06090 | 2806543-2813004   |
| BdMPK7-1  | Bradi1g34030 | 29632402-29634667 | BdMPK14          | Bradi3g03780   | 2521821-2525826   |
| BdMPK7-1  | Bradi1g34030 | 29632402-29634667 | OsMPK7           | LOC_Os06g48590 | 29398386-29402535 |
| BdMPK11   | Bradi3g16560 | 14742468-14745425 | AtMPK4           | At4g01370      | 567219-568889     |
| BdMPK11   | Bradi3g16560 | 14742468-14745425 |                  | LOC_Os08g06060 | 3307520-3310590   |
| BdMPK14   | Bradi3g03780 | 2521821-2525826   | BdMPK7-1         | Bradi1g34030   | 29632402-29634667 |
| BdMPK14   | Bradi3g03780 | 2521821-2525826   | AtMPK1           | At1g10210      | 3349579-3350776   |
| BdMPK14   | Bradi3g03780 | 2521821-2525826   | OsMPK14          | LOC_Os02g05480 | 2643056-2646360   |
| BdMPK16   | Bradi2g36470 | 36786589-36792652 | AtMPK16          | AT5G19010      | 6347676-6345096   |
| BdMPK16   | Bradi2g36470 | 36786589-36792652 |                  | LOC_Os05g05160 | 2511542-2518105   |
| BdMPK17   | Bradi1g34700 | 30307750-30312635 | AtMPK9           | AT3G18040      | 6174800-6178150   |
| BdMPK17   | Bradi1g34700 | 30307750-30312635 | OsMPK17-1        | LOC_Os06g49430 | 29949898-29954873 |
| BdMPK20-1 | Bradi2g44350 | 44852084-44858179 | BdMPK20-4        | Bradi2g45870   | 46302880-46308387 |
| BdMPK20-1 | Bradi2g44350 | 44852084-44858179 |                  | Bradi2g15320   | 13688732-13693325 |
| BdMPK20-1 | Bradi2g44350 | 44852084-44858179 | AtMPK20          | AT2G42880      | 17843947-17840572 |
| BdMPK20-1 | Bradi2g44350 | 44852084-44858179 | OsMPK20-1        | LOC_Os01g43910 | 25152108-25158338 |
| BdMPK20-3 | Bradi1g41780 | 38419711-38433437 | OsMPK20-3        | LOC_Os06g26340 | 15414829-15423582 |
| BdMPK20-4 | Bradi2g45870 | 46302880-46308387 | OsMPK20-4        | LOC_Os01g47530 | 27171290-27178237 |
| BdMPK20-4 | Bradi2g45870 | 46302880-46308387 | BdMPK20-1        | Bradi2g44350   | 44852084-44858179 |
| BdMPK20-4 | Bradi2g45870 | 46302880-46308387 |                  | Bradi2g16340   | 14412074-14416456 |
| BdMPK20-4 | Bradi2g45870 | 46302880-46308387 |                  | Bradi2g15320   | 13688732-13693325 |
| BdMPK21-1 | Bradi2g15620 | 13875717-13880863 | BdMPK21-2        | Bradi2g45010   | 45394037-45403577 |
| BdMPK21-1 | Bradi2g15620 | 13875717-13880863 | OsMPK21-1        | LOC_Os05g50120 | 28721012-28726493 |
| BdMPK21-2 | Bradi2g45010 | 45394037-45403577 | BdMPK21-1        | Bradi2g15620   | 13875717-13880863 |
| BdMPK21-2 | Bradi2g45010 | 45394037-45403577 | OsMPK21-2        | LOC_Os01g45620 | 25917636-25922976 |
| AtMPK1    | At1g10210    | 3349579-3350776   | AtMPK2           | At1g59580      | 21884521-21885743 |
| AtMPK1    | At1g10210    | 3349579-3350776   | BdMPK14          | Bradi3g03780   | 2521821-2525826   |
| AtMPK2    | At1g59580    | 21884521-21885743 | AtMPK1           | At1g10210      | 3349579-3350776   |
| AtMPK3    | At3g45640    | 16756918-16758476 | BdMPK3           | Bradi1g65810   | 64739946-64742370 |
| AtMPK4    | At4g01370    | 567219-568889     | AtMPK11          | At1g01560      | 202345-204189     |
| AtMPK4    | At4g01370    | 567219-568889     | AtMPK12          | At2g46070      | 18947770-18946134 |
| AtMPK4    | At4g01370    | 567219-568889     | AtMPK5           | At4g11330      | 6892143-6893845   |
| AtMPK4    | At4g01370    | 567219-568889     | BdMPK11          | Bradi3g16560   | 14742468-14745425 |
| AtMPK5    | At4g11330    | 6892143-6893845   | AtMPK12          | At2g46070      | 18947770-18946134 |
| AtMPK5    | At4g11330    | 6892143-6893845   | AtMPK4           | At4g01370      | 567219-568889     |
| AtMPK6    | At2g43790    | 18138477-18140693 | AtMPK10          | At3g59790      | 22092448-22094240 |
| AtMPK6    | AT2G43790    | 18138477-18140693 | BdMPK6           | Bradi1g49100   | 47836748-47843578 |
| AtMPK7    | At2g18170    | 7909374-7908178   | AtMPK14          | At4g36450      | 17211413-17210245 |

|           |                |                   |           |                |                   |
|-----------|----------------|-------------------|-----------|----------------|-------------------|
| AtMPK8    | At1g18150      | 6247582-6244641   | AtMPK15   | At1g73670      | 27700212-27703168 |
| AtMPK9    | At3g18040      | 6174800-6178150   | AtMPK15   | At1g73670      | 27700212-27703168 |
| AtMPK9    | AT3G18040      | 6174800-6178150   | BdMPK17   | Bradi1g34700   | 30307750-30312635 |
| AtMPK10   | At3g59790      | 22092448-22094240 | AtMPK6    | At2g43790      | 18138477-18140693 |
| AtMPK11   | At1g01560      | 202345-204189     | AtMPK4    | At4g01370      | 567219-568889     |
| AtMPK11   | At1g01560      | 202345-204189     | AtMPK12   | At2g46070      | 18947770-18946134 |
| AtMPK11   | AT1G01560      | 202345-204189     | BdMPK4    | Bradi3g32000   | 34209148-34213422 |
| AtMPK12   | At2g46070      | 18947770-18946134 | AtMPK4    | At4g01370      | 567219-568889     |
| AtMPK12   | At2g46070      | 18947770-18946134 | AtMPK5    | At4g11330      | 6892143-6893845   |
| AtMPK12   | At2g46070      | 18947770-18946134 | AtMPK11   | At1g01560      | 202345-204189     |
| AtMPK14   | At4g36450      | 17211413-17210245 | AtMPK7    | At2g18170      | 7909374-7908178   |
| AtMPK15   | At1g73670      | 27700212-27703168 | AtMPK8    | At1g18150      | 6247582-6244641   |
| AtMPK15   | At1g73670      | 27700212-27703168 | AtMPK9    | At3g18040      | 6174800-6178150   |
| AtMPK16   | AT5G19010      | 6347676-6345096   | BdMPK16   | Bradi2g36470   | 36786589-36792652 |
| AtMPK18   | At1g53510      | 19974158-19970961 | AtMPK19   | At3g14720      | 4946057-4948906   |
| AtMPK19   | At3g14720      | 4946057-4948906   | AtMPK18   | At1g53510      | 19974158-19970961 |
| AtMPK20   | AT2G42880      | 17843947-17840572 | BdMPK20-1 | Bradi2g44350   | 44852084-44858179 |
| OsMPK3    | LOC_Os03g17700 | 9847700-9850473   | BdMPK3    | Bradi1g65810   | 64739946-64742370 |
| OsMPK4    | LOC_Os10g38950 | 20684835-20687729 | BdMPK4    | Bradi3g32000   | 34209148-34213422 |
| OsMPK6    | LOC_Os06g06090 | 2806543-2813004   | BdMPK6    | Bradi1g49100   | 47836748-47843578 |
| OsMPK7    | LOC_Os06g48590 | 29398386-29402535 | OsMPK14   | LOC_Os02g05480 | 2643056-2646360   |
| OsMPK7    | LOC_Os06g48590 | 29398386-29402535 | BdMPK7-1  | Bradi1g34030   | 29632402-29634667 |
| OsMPK14   | LOC_Os02g05480 | 2643056-2646360   | OsMPK7    | LOC_Os06g48590 | 29398386-29402535 |
| OsMPK14   | LOC_Os02g05480 | 2643056-2646360   | BdMPK14   | Bradi3g03780   | 2521821-2525826   |
| OsMPK17-1 | LOC_Os06g49430 | 29949898-29954873 | OsMPK17-2 | LOC_Os02g04230 | 1850981-1858243   |
| OsMPK17-1 | LOC_Os06g49430 | 29949898-29954873 | BdMPK17   | Bradi1g34700   | 30307750-30312635 |
| OsMPK17-2 | LOC_Os02g04230 | 1850981-1858243   | OsMPK17-1 | LOC_Os06g49430 | 29949898-29954873 |
| OsMPK20-1 | LOC_Os01g43910 | 25152108-25158338 | OsMPK20-4 | LOC_Os01g47530 | 27171290-27178237 |
| OsMPK20-1 | LOC_Os01g43910 | 25152108-25158338 | BdMPK20-1 | Bradi2g44350   | 44852084-44858179 |
| OsMPK20-3 | LOC_Os06g26340 | 15414829-15423582 | BdMPK20-3 | Bradi1g41780   | 38419711-38433437 |
| OsMPK20-4 | LOC_Os01g47530 | 27171290-27178237 | OsMPK20-5 | LOC_Os05g49140 | 28188894-28194022 |
| OsMPK20-4 | LOC_Os01g47530 | 27171290-27178237 | OsMPK20-1 | LOC_Os01g43910 | 25152108-25158338 |
| OsMPK20-4 | LOC_Os01g47530 | 27171290-27178237 | BdMPK20-4 | Bradi2g45870   | 46302880-46308387 |
| OsMPK20-5 | LOC_Os05g49140 | 28188894-28194022 | OsMPK20-4 | LOC_Os01g47530 | 27171290-27178237 |
| OsMPK21-1 | LOC_Os05g50120 | 28721012-28726493 | OsMPK21-2 | LOC_Os01g45620 | 25917636-25922976 |
| OsMPK21-1 | LOC_Os05g50120 | 28721012-28726493 | BdMPK21-1 | Bradi2g15620   | 13875717-13880863 |
| OsMPK21-2 | LOC_Os01g45620 | 25917636-25922976 | OsMPK21-1 | LOC_Os05g50120 | 28721012-28726493 |
| OsMPK21-2 | LOC_Os01g45620 | 25917636-25922976 | BdMPK21-2 | Bradi2g45010   | 45394037-45403577 |
| BdMKK1    | Bradi1g51000   | 49443017-49446304 | AtMKK2    | At4g29810      | 14595241-14593299 |
| BdMKK1    | Bradi1g51000   | 49443110-49445886 | OsMKK1    | LOC_Os06g05520 | 2498863-2502887   |
| BdMKK3-2  | Bradi1g41860   | 38580168-38590500 | OsMKK3    | LOC_Os06g27890 | 15811009-15821885 |
| BdMKK3-2  | Bradi1g41860   | 38580168-38590500 | AtMKK3    | AT5G40440      | 16182149-16184513 |
| BdMKK4    | Bradi3g53650   | 54258852-54260320 | BdMKK5    | Bradi1g46880   | 45433080-45434736 |
| BdMKK4    | Bradi3g53650   | 54258852-54259925 | OsMKK4    | LOC_Os02g54600 | 33442070-33443948 |
| BdMKK4    | Bradi3g53650   | 54258852-54259925 | OsMKK5    | LOC_Os06g09180 | 4616608-4618145   |
| BdMKK5    | Bradi1g46880   | 45433080-45434736 | OsMKK6    | LOC_Os06g09180 | 4616608-4618145   |

|            |                |                   |            |                |                   |
|------------|----------------|-------------------|------------|----------------|-------------------|
| BdMCK5     | Bradi1g46880   | 45433080-45434736 | BdMCK4     | Bradi3g53650   | 54258852-54260320 |
| BdMCK5     | Bradi1g46880   | 45433080-45434736 | AtMCK4     | At1g51660      | 19154575-19155675 |
| BdMCK5     | Bradi1g46880   | 45434682-45433651 | OsMCK4     | LOC_Os02g54600 | 33442070-33443948 |
| BdMCK5     | Bradi1g46880   | 45434682-45433651 | OsMCK5     | LOC_Os06g09180 | 4616608-4618145   |
| BdMCK6     | Bradi1g75150   | 72118481-72123498 | OsMCK5     | LOC_Os01g32660 | 17904834-17910037 |
| BdMCK6     | Bradi1g75150   | 72118481-72123498 | AtMCK6     | At5g56580      | 22906620-22904851 |
| BdMCK10-2  | Bradi1g69400   | 67832493-67833815 | OsMCK10-2  | LOC_Os03g12390 | 6545153-6546478   |
| BdMCK10-2  | Bradi1g69400   | 67832493-67833815 | OsMCK10-3  | LOC_Os03g50550 | 28859516-28862894 |
| BdMCK10-3  | Bradi1g10800   | 7865287-7866321   | OsMCK10-3  | LOC_Os03g50550 | 28859516-28862894 |
| BdMCK10-3  | Bradi1g10800   | 7865287-7866321   | AtMCK9     | AT1G73500      | 27640351-27639419 |
| BdMCK10-4  | Bradi1g10770   | 7809375-7810400   | OsMCK10-3  | LOC_Os03g50550 | 28859516-28862894 |
| AtMCK1     | At4g26070      | 13217797-13219695 | AtMCK2     | At4g29810      | 14595241-14593299 |
| AtMCK2     | At4g29810      | 14595241-14593299 | AtMCK1     | At4g26070      | 13217797-13219695 |
| AtMCK2     | At4g29810      | 14595241-14593299 | BdMCK1     | Bradi1g51000   | 49443017-49446304 |
| AtMCK3     | At5g40440      | 16182149-16184513 | BdMCK3-2   | Bradi1g41860   | 38580168-38590500 |
| AtMCK4     | At1g51660      | 19154575-19155675 | AtMCK5     | AT3G21220      | 7445917-7446963   |
| AtMCK4     | At1g51660      | 19154575-19155675 | BdMCK5     | Bradi1g46880   | 45433080-45434736 |
| AtMCK5     | At3g21220      | 7445917-7446963   | AtMCK4     | At1g51660      | 19154575-19155675 |
| AtMCK6     | At5g56580      | 22906620-22904851 | BdMCK6     | Bradi1g75150   | 72118481-72123498 |
| AtMCK7     | At1g18350      | 6315686-6316609   | AtMCK9     | AT1G73500      | 27640351-27639419 |
| AtMCK9     | At1g73500      | 27640351-27639419 | AtMCK7     | At1g18350      | 6315686-6316609   |
| AtMCK9     | At1g73500      | 27640351-27639419 | BdMCK10-3  | Bradi1g10800   | 7865287-7866321   |
| OsMCK1     | LOC_Os06g05520 | 2498863-2502887   | BdMCK1     | Bradi1g51000   | 49443017-49446304 |
| OsMCK3     | LOC_Os06g27890 | 15811009-15821885 | BdMCK3-2   | Bradi1g41860   | 38580168-38590500 |
| OsMCK4     | LOC_Os02g54600 | 33442070-33443948 | OsMCK5     | LOC_Os06g09180 | 4616608-4618145   |
| OsMCK4     | LOC_Os02g54600 | 33442070-33443948 | BdMCK4     | Bradi3g53650   | 54258852-54259925 |
| OsMCK4     | LOC_Os02g54600 | 33442070-33443948 | BdMCK5     | Bradi1g46880   | 45434682-45433651 |
| OsMCK5     | LOC_Os06g09180 | 4616608-4618145   | BdMCK5     | Bradi1g46880   | 45434682-45433651 |
| OsMCK5     | LOC_Os06g09180 | 4616608-4618145   | BdMCK4     | Bradi3g53650   | 54258852-54260320 |
| OsMCK5     | LOC_Os01g32660 | 17904834-17910037 | BdMCK6     | Bradi1g75150   | 72118481-72123498 |
| OsMCK5     | LOC_Os06g09180 | 4616608-4618145   | OsMCK4     | LOC_Os02g54600 | 33442070-33443948 |
| OsMCK6     | LOC_Os06g09180 | 4616608-4618145   | BdMCK5     | Bradi1g46880   | 45433080-45434736 |
| OsMCK10-2  | LOC_Os03g12390 | 6545153-6546478   | OsMCK10-3  | LOC_Os03g50550 | 28859516-28862894 |
| OsMCK10-2  | LOC_Os03g12390 | 6545153-6546478   | BdMCK10-2  | Bradi1g69400   | 67832545-67833567 |
| OsMCK10-3  | LOC_Os03g50550 | 28859516-28862894 | OsMCK10-2  | LOC_Os03g12390 | 6545153-6546478   |
| OsMCK10-3  | LOC_Os03g50550 | 28859516-28862894 | BdMCK10-4  | Bradi1g10770   | 7809375-7810400   |
| OsMCK10-3  | LOC_Os03g50550 | 28859516-28862894 | BdMCK10-2  | Bradi1g69400   | 67832493-67833815 |
| OsMCK10-3  | LOC_Os03g50550 | 28859516-28862894 | BdMCK10-3  | Bradi1g10800   | 7865287-7866321   |
| BdMAPKKK1  | Bradi5g24870   | 26381665-26393219 | OsMAPKKK24 | LOC_Os04g56530 | 33707455-33719236 |
| BdMAPKKK2  | Bradi1g28950   | 24311845-24322003 | OsMAPKKK21 | LOC_Os07g25680 | 14723111-14727159 |
| BdMAPKKK3  | Bradi3g60210   | 59221921-59227497 | OsMAPKKK35 | LOC_Os02g54510 | 33387811-33392575 |
| BdMAPKKK4  | Bradi1g47570   | 46211026-46216334 | OsMAPKKK39 | LOC_Os06g08280 | 4008139-4013539   |
| BdMAPKKK5  | Bradi3g59510   | 58646176-58654454 | OsMAPKKK7  | LOC_Os06g12590 | 6823036-6832862   |
| BdMAPKKK7  | Bradi1g45040   | 43232910-43245317 | OsMAPKKK7  | LOC_Os06g12590 | 6823036-6832862   |
| BdMAPKKK10 | Bradi2g46340   | 46786767-46795821 | OsMAPKKK40 | LOC_Os01g48330 | 27702476-27692557 |
| BdMAPKKK15 | Bradi4g04470   | 3687248-3696919   | OsMAPKKK5  | LOC_Os12g37570 | 23061181-23068420 |

|            |              |                   |                |                |                   |
|------------|--------------|-------------------|----------------|----------------|-------------------|
| BdMAPKKK16 | Bradi1g23970 | 19257221-19260591 | OsMAPKKK20     | LOC_Os07g38530 | 23145979-23149609 |
| BdMAPKKK21 | Bradi4g36880 | 42043874-42051570 | AtRaf21        | At2g17700      | 7685388-7689436   |
| BdMAPKKK21 | Bradi4g36880 | 42043874-42051570 | AtRaf29        | At4g35780      | 16946521-16950594 |
| BdMAPKKK22 | Bradi2g39350 | 39411876-39418219 | OsMAPKKK56     | LOC_Os05g01780 | 471400-476283     |
| BdMAPKKK23 | Bradi4g29500 | 34951319-34957350 | BdMAPKKK25     | Bradi3g36080   | 38320000-38325924 |
| BdMAPKKK23 | Bradi4g29500 | 34951319-34957350 | OsMAPKKK13     | LOC_Os09g21510 | 13014100-13015909 |
| BdMAPKKK24 | Bradi1g60340 | 59671548-59677424 | OsMAPKKK54     | LOC_Os03g28300 | 16282710-16290482 |
| BdMAPKKK25 | Bradi3g36080 | 38320000-38325924 | BdMAPKKK23     | Bradi4g29500   | 34951319-34957350 |
| BdMAPKKK25 | Bradi3g36080 | 38320000-38325924 | OsMAPKKK13     | LOC_Os09g21510 | 13014100-13015909 |
| BdMAPKKK28 | Bradi3g51460 | 52493768-52498074 | OsMAPKKK29     | LOC_Os02g45130 | 27376763-27372028 |
| BdMAPKKK31 | Bradi2g06260 | 4698348-4702360   | OsMAPKKK61     | LOC_Os01g10450 | 5514480-5510516   |
| BdMAPKKK32 | Bradi2g19590 | 17241445-17245595 | BdMAPKKK35     | Bradi2g49700   | 49740523-49744032 |
| BdMAPKKK32 | Bradi2g19590 | 17241445-17245595 | OsMAPKKK49     | LOC_Os05g44290 | 25771768-25776102 |
| BdMAPKKK33 | Bradi3g48360 | 49832148-49837407 | AtRaf46        | At3g59830      | 22102803-22105380 |
| BdMAPKKK33 | Bradi3g48360 | 49832148-49837407 | OsMAPKKK75     | LOC_Os02g39560 | 23876495-23881702 |
| BdMAPKKK35 | Bradi2g49700 | 49740523-49744032 | BdMAPKKK32     | Bradi2g19590   | 17241445-17245595 |
| BdMAPKKK35 | Bradi2g49700 | 49740523-49744032 | OsMAPKKK49     | LOC_Os05g44290 | 25771794-25775926 |
| BdMAPKKK36 | Bradi2g57470 | 55622119-55624811 | AtRaf46        | At3g59830      | 22102803-22105380 |
| BdMAPKKK36 | Bradi2g57470 | 55622119-55624811 | OsMAPKKK74     | LOC_Os01g66860 | 38818767-38822164 |
| BdMAPKKK40 | Bradi2g49790 | 49806289-49809892 | AtRaf27        | At4g18950      | 10375364-10378390 |
| BdMAPKKK40 | Bradi2g49790 | 49806289-49809892 | OsMAPKKK72     | LOC_Os01g54480 | 31337161-31332864 |
| BdMAPKKK41 | Bradi1g14000 | 10874042-10878698 | Bradi4g02370   | Bradi4g02370   | 1555141-1554617   |
| BdMAPKKK41 | Bradi1g14000 | 10874042-10878698 | OsMAPKKK27     | LOC_Os03g43760 | 24476011-24480930 |
| BdMAPKKK41 | Bradi1g14000 | 10874042-10878698 | OsMAPKKK59     | LOC_Os12g41260 | 25583204-25586395 |
| BdMAPKKK43 | Bradi1g04080 | 2776045-2779519   | OsMAPKKK42     | LOC_Os03g60150 | 34206308-34202415 |
| BdMAPKKK45 | Bradi3g47600 | 49203215-49208033 | OsMAPKKK25     | LOC_Os02g38080 | 22999976-23005321 |
| BdMAPKKK46 | Bradi2g44910 | 45294740-45299227 | BdMAPKKK47     | Bradi2g15560   | 13839453-13843007 |
| BdMAPKKK46 | Bradi2g44910 | 45294740-45299227 | OsMAPKKK31     | LOC_Os01g45380 | 25757795-25762187 |
| BdMAPKKK46 | Bradi2g44910 | 45294740-45299227 | OsMAPKKK34     | LOC_Os05g50190 | 28763886-28760152 |
| BdMAPKKK47 | Bradi2g15560 | 13839453-13843007 | BdMAPKKK46     | Bradi2g44910   | 45294740-45299227 |
| BdMAPKKK47 | Bradi2g15560 | 13839453-13843007 | OsMAPKKK34     | LOC_Os05g50190 | 28763886-28760152 |
| BdMAPKKK49 | Bradi1g20390 | 16330864-16335462 | OsMAPKKK65     | LOC_Os07g43900 | 26250364-26245519 |
| BdMAPKKK50 | Bradi4g44430 | 47836156-47839912 | AtZIK2         | At5g58350      | 23584789-23587801 |
| BdMAPKKK50 | Bradi4g44430 | 47836156-47839912 | OsMAPKKK50     | LOC_Os12g02250 | 705258-698936     |
| BdMAPKKK54 | Bradi1g23320 | 18706049-18708119 | OsMAPKKK64     | LOC_Os07g39520 | 23677863-23679948 |
| BdMAPKKK56 | Bradi4g41940 | 45996792-45999204 | OsMAPKKK46     | LOC_Os11g06140 | 2929173-2925595   |
| BdMAPKKK56 | Bradi4g41940 | 45996792-45999204 | OsMAPKKK52     | LOC_Os12g06490 | 3131907-3128498   |
| BdMAPKKK60 | Bradi1g65500 | 64476929-64478355 | AtMAPKKK13     | At1g07150      | 2193941-2195798   |
| BdMAPKKK60 | Bradi1g65500 | 64476929-64478355 | AtMAPKKK14     | At2g30040      | 12821710-12823169 |
| BdMAPKKK60 | Bradi1g65500 | 64476929-64478355 | OsMAPKKK73     | LOC_Os03g18170 | 10184582-10187474 |
| BdMAPKKK62 | Bradi4g09990 | 9550465-9557023   | LOC_Os11g45280 | LOC_Os11g45280 | 27399798-27406608 |
| BdMAPKKK64 | Bradi4g02900 | 2137135-2141974   | OsMAPKKK23     | LOC_Os12g40279 | 24925191-24950240 |
| BdMAPKKK70 | Bradi3g57740 | 57407383-57412051 | LOC_Os02g53040 | LOC_Os02g53040 | 32461128-32462832 |
| AtMAPKKK1  | At1g09000    | 2891037-2895182   | AtMAPKKK2      | At1g54960      | 20499950-20503841 |
| AtMAPKKK2  | At1g54960    | 20499950-20503841 | AtMAPKKK1      | At1g09000      | 2891037-2895182   |
| AtMAPKKK2  | At1g54960    | 20499950-20503841 | AtMAPKKK7      | At3g13530      | 4411688-4419320   |

|            |           |                   |            |                |                   |
|------------|-----------|-------------------|------------|----------------|-------------------|
| AtMAPKKK7  | At3g13530 | 4411688-4419320   | AtMAPKKK2  | At1g54960      | 20499950-20503841 |
| AtMAPKKK13 | At1g07150 | 2193941-2195798   | AtMAPKKK14 | At2g30040      | 12821710-12823169 |
| AtMAPKKK13 | At1g07150 | 2193941-2195798   | BdMAPKKK60 | Bradi1g65500   | 64476929-64478355 |
| AtMAPKKK14 | At2g30040 | 12821710-12823169 | BdMAPKKK60 | Bradi1g65500   | 64476929-64478355 |
| AtMAPKKK14 | At2g30040 | 12821710-12823169 | AtMAPKKK13 | At1g07150      | 2193941-2195798   |
| AtMAPKKK15 | At5g55090 | 22356852-22358198 | AtMAPKKK16 | At4g26890      | 13511839-13513406 |
| AtMAPKKK16 | At4g26890 | 13511839-13513406 | AtMAPKKK15 | At5g55090      | 22356852-22358198 |
| AtMAPKKK17 | At2g32510 | 13798821-13799939 | AtMAPKKK18 | At1g05100      | 1469610-1470881   |
| AtMAPKKK18 | At1g05100 | 1469610-1470881   | AtMAPKKK17 | At2g32510      | 13798821-13799939 |
| AtMAPKKK19 | At5g67080 | 26772726-26773760 | AtMAPKKK20 | At3g50310      | 18648151-18649521 |
| AtMAPKKK19 | At5g67080 | 26772726-26773760 | AtMAPKKK21 | At4g36950      | 17422572-17423901 |
| AtMAPKKK20 | At3g50310 | 18648151-18649521 | AtMAPKKK19 | At5g67080      | 26772726-26773760 |
| AtMAPKKK21 | At4g36950 | 17422572-17423901 | AtMAPKKK19 | At5g67080      | 26772726-26773760 |
| AtRaf4     | At1g18160 | 6248793-6254039   | AtRaf5     | At1g73660      | 27691893-27697211 |
| AtRaf5     | At1g73660 | 27691893-27697211 | AtRaf4     | At1g18160      | 6248793-6254039   |
| AtRaf7     | At3g06620 | 2062206-2067416   | AtRaf10    | At5g49470      | 20063448-20068665 |
| AtRaf10    | At5g49470 | 20063448-20068665 | AtRaf7     | At3g06620      | 2062206-2067416   |
| AtRaf15    | At3g58640 | 21686741-21693841 | At2g42640  | At2g42640      | 17758532-17764111 |
| AtRaf18    | At1g16270 | 5563087-5568368   | AtRaf20    | At1g79570      | 39932578-29938856 |
| AtRaf20    | At1g79570 | 39932578-29938856 | AtRaf18    | At1g16270      | 5563087-5568368   |
| AtRaf21    | At2g17700 | 7685388-7689436   | BdMAPKKK21 | Bradi4g36880   | 42043874-42051570 |
| AtRaf21    | At2g17700 | 7685388-7689436   | AtRaf29    | At4g35780      | 16946520-16950594 |
| AtRaf22    | At2g24360 | 10364451-10366902 | AtRaf28    | At4g31170      | 15153182-15155703 |
| AtRaf23    | At2g31800 | 13520325-13523708 | AtRaf25    | At2g43850      | 18159182-18162044 |
| AtRaf25    | At2g43850 | 18159182-18162044 | AtRaf23    | At2g31800      | 13520325-13523708 |
| AtRaf25    | At2g43850 | 18159182-18162044 | AtRaf46    | At3g59830      | 22102803-22105380 |
| AtRaf26    | At4g14780 | 8492832-8494591   | AtRaf39    | At3g22750      | 8037216-8039903   |
| AtRaf27    | At4g18950 | 10375364-10378390 | BdMAPKKK40 | Bradi2g49790   | 49806289-49809892 |
| AtRaf27    | At4g18950 | 10375364-10378390 | OsMAPKKK72 | LOC_Os01g54480 | 31337161-31332864 |
| AtRaf28    | At4g31170 | 15153182-15155703 | AtRaf22    | At2g24360      | 10364451-10366902 |
| AtRaf29    | At4g35780 | 16946521-16950594 | BdMAPKKK21 | Bradi4g36880   | 42043874-42051570 |
| AtRaf29    | At4g35780 | 16946520-16950594 | AtRaf21    | At2g17700      | 7685388-7689436   |
| AtRaf32    | At5g40540 | 16237298-16239601 | AtRaf41    | At3g27560      | 10210431-10213004 |
| AtRaf36    | At5g58950 | 23800928-23803676 | AtRaf43    | At3g46930      | 17285643-17288032 |
| AtRaf37    | At5g66710 | 26636609-26638794 | AtRaf44    | At3g50720      | 18847519-18849430 |
| AtRaf39    | At3g22750 | 8037216-8039903   | AtRaf26    | At4g14780      | 8492832-8494591   |
| AtRaf39    | At3g22750 | 8037216-8039903   | AtRaf48    | At3g63260      | 23372881-23375007 |
| AtRaf41    | At3g27560 | 10210431-10213004 | AtRaf32    | At5g40540      | 16237298-16239601 |
| AtRaf43    | At3g46930 | 17285643-17288032 | AtRaf36    | At5g58950      | 23800928-23803676 |
| AtRaf44    | At3g50720 | 18847519-18849430 | AtRaf37    | At5g66710      | 26636609-26638794 |
| AtRaf46    | At3g59830 | 22102803-22105380 | BdMAPKKK33 | Bradi3g48360   | 49832148-49837407 |
| AtRaf46    | At3g59830 | 22102803-22105380 | BdMAPKKK36 | Bradi2g57470   | 55622119-55624811 |
| AtRaf46    | At3g59830 | 22102803-22105380 | AtRaf25    | At2g43850      | 18159182-18162044 |
| AtRaf48    | At3g63260 | 23372881-23375007 | AtRaf39    | At3g22750      | 8037216-8039903   |
| AtZIK2     | At5g58350 | 23584789-23587801 | BdMAPKKK50 | Bradi4g44430   | 47836156-47839912 |
| AtZIK4     | At3g04910 | 1354635-1358219   | AtZIK9     | At5g28080      | 10090070-10092402 |

|            |                |                   |                |                |                   |
|------------|----------------|-------------------|----------------|----------------|-------------------|
| AtZIK5     | At3g18750      | 6454110-6457512   | AtZIK7         | At1g49160      | 18179304-18182391 |
| AtZIK7     | At1g49160      | 18179304-18182391 | AtZIK5         | At3g18750      | 6454110-6457512   |
| AtZIK9     | At5g28080      | 10090070-10092402 | AtZIK4         | At3g04910      | 1354635-1358219   |
| OsMAPKKK1  | LOC_Os03g06410 | 3201345-3208276   | OsMAPKKK2      | LOC_Os10g29540 | 15341888-15350754 |
| OsMAPKKK2  | LOC_Os10g29540 | 15341888-15350754 | OsMAPKKK1      | LOC_Os03g06410 | 3201345-3208276   |
| OsMAPKKK5  | LOC_Os12g37570 | 23061642-23065235 | LOC_Os11g45280 | LOC_Os11g45280 | 27399450-27406535 |
| OsMAPKKK5  | LOC_Os12g37570 | 23061181-23068420 | BdMAPKKK15     | Bradi4g04470   | 3687248-3696919   |
| OsMAPKKK6  | LOC_Os02g50970 | 31171975-31180079 | OsMAPKKK7      | LOC_Os06g12590 | 6823036-6832862   |
| OsMAPKKK7  | LOC_Os06g12590 | 6832750-6822979   | BdMAPKKK5      | Bradi3g59510   | 58646176-58654454 |
| OsMAPKKK7  | LOC_Os06g12590 | 6823036-6832862   | BdMAPKKK7      | Bradi1g45040   | 43232910-43245317 |
| OsMAPKKK7  | LOC_Os06g12590 | 6823036-6832862   | OsMAPKKK6      | LOC_Os02g50970 | 31171975-31180079 |
| OsMAPKKK9  | LOC_Os02g44642 | 27048920-27061955 | OsMAPKKK10     | LOC_Os04g47240 | 28049246-28056867 |
| OsMAPKKK10 | LOC_Os04g47240 | 28049246-28056867 | OsMAPKKK9      | LOC_Os02g44642 | 27048920-27061955 |
| OsMAPKKK11 | LOC_Os07g02780 | 1015354-1021607   | OsMAPKKK18     | LOC_Os03g55560 | 31612448-31619532 |
| OsMAPKKK13 | LOC_Os09g21510 | 13010191-13017007 | BdMAPKKK23     | Bradi4g29500   | 34951319-34957350 |
| OsMAPKKK13 | LOC_Os09g21510 | 13014100-13015909 | BdMAPKKK25     | Bradi3g36080   | 38320000-38325924 |
| OsMAPKKK13 | LOC_Os09g21510 | 13014100-13015909 | OsMAPKKK15     | LOC_Os08g32600 | 20186987-20192334 |
| OsMAPKKK15 | LOC_Os08g32600 | 20186987-20192334 | OsMAPKKK13     | LOC_Os09g21510 | 13014100-13015909 |
| OsMAPKKK16 | LOC_Os04g35700 | 21752568-21758576 | OsMAPKKK19     | LOC_Os02g35010 | 21002439-21008209 |
| OsMAPKKK18 | LOC_Os03g55560 | 31612448-31619532 | OsMAPKKK11     | LOC_Os07g02780 | 1015354-1021607   |
| OsMAPKKK19 | LOC_Os02g35010 | 21002439-21008209 | OsMAPKKK16     | LOC_Os04g35700 | 21752568-21758576 |
| OsMAPKKK20 | LOC_Os07g38530 | 23145979-23149609 | BdMAPKKK16     | Bradi1g23970   | 19257221-19260591 |
| OsMAPKKK21 | LOC_Os07g25680 | 14723111-14727159 | BdMAPKKK2      | Bradi1g28950   | 24311845-24322003 |
| OsMAPKKK22 | LOC_Os03g49640 | 28269607-28275709 | OsMAPKKK28     | LOC_Os03g15570 | 8573083-8577492   |
| OsMAPKKK23 | LOC_Os12g40279 | 24926341-24930364 | Bradi4g02910   | Bradi4g02910   | 2144483-2162831   |
| OsMAPKKK23 | LOC_Os12g40279 | 24925191-24950240 | BdMAPKKK64     | Bradi4g02900   | 2137135-2141974   |
| OsMAPKKK24 | LOC_Os04g56530 | 33707455-33719236 | BdMAPKKK1      | Bradi5g24870   | 26381665-26393219 |
| OsMAPKKK25 | LOC_Os02g38080 | 22999976-23005321 | BdMAPKKK45     | Bradi3g47600   | 49203215-49208033 |
| OsMAPKKK27 | LOC_Os03g43760 | 24476011-24480930 | BdMAPKKK41     | Bradi1g14000   | 10874042-10878698 |
| OsMAPKKK27 | LOC_Os03g43760 | 24476060-24480927 | OsMAPKKK59     | LOC_Os12g41260 | 25583204-25586395 |
| OsMAPKKK28 | LOC_Os03g15570 | 8573083-8577492   | OsMAPKKK22     | LOC_Os03g49640 | 28269607-28275709 |
| OsMAPKKK29 | LOC_Os02g45130 | 27376763-27372028 | BdMAPKKK28     | Bradi3g51460   | 52493768-52498074 |
| OsMAPKKK31 | LOC_Os01g45380 | 25757795-25762187 | BdMAPKKK46     | Bradi2g44910   | 45294740-45299227 |
| OsMAPKKK31 | LOC_Os01g45380 | 25757795-25762187 | OsMAPKKK34     | LOC_Os05g50190 | 28763886-28760152 |
| OsMAPKKK32 | LOC_Os08g12750 | 7553773-7558719   | OsMAPKKK37     | LOC_Os04g51950 | 30825563-30829578 |
| OsMAPKKK33 | LOC_Os02g07790 | 4078521-4081527   | OsMAPKKK38     | LOC_Os06g45300 | 27384305-27386857 |
| OsMAPKKK34 | LOC_Os05g50190 | 28763886-28760152 | BdMAPKKK46     | Bradi2g44910   | 45294740-45299227 |
| OsMAPKKK34 | LOC_Os05g50190 | 28763886-28760152 | BdMAPKKK47     | Bradi2g15560   | 13839453-13843007 |
| OsMAPKKK34 | LOC_Os05g50190 | 28763886-28760152 | OsMAPKKK31     | LOC_Os01g45380 | 25757795-25762187 |
| OsMAPKKK35 | LOC_Os02g54510 | 33387811-33392575 | BdMAPKKK3      | Bradi3g60210   | 59221921-59227497 |
| OsMAPKKK37 | LOC_Os04g51950 | 30825563-30829578 | OsMAPKKK32     | LOC_Os08g12750 | 7553773-7558719   |
| OsMAPKKK37 | LOC_Os04g51950 | 30825563-30829578 | OsMAPKKK38     | LOC_Os06g45300 | 27384305-27386857 |
| OsMAPKKK38 | LOC_Os06g45300 | 27384305-27386857 | OsMAPKKK33     | LOC_Os02g07790 | 4078521-4081527   |
| OsMAPKKK38 | LOC_Os06g45300 | 27384305-27386857 | OsMAPKKK37     | LOC_Os04g51950 | 30825563-30829578 |
| OsMAPKKK39 | LOC_Os06g08280 | 4008139-4013539   | BdMAPKKK4      | Bradi1g47570   | 46211026-46216334 |
| OsMAPKKK40 | LOC_Os01g48330 | 27702476-27692557 | BdMAPKKK10     | Bradi2g46340   | 46786767-46795821 |

|            |                |                   |            |                |                   |
|------------|----------------|-------------------|------------|----------------|-------------------|
| OsMAPKKK42 | LOC_Os03g60150 | 34206308-34202415 | BdMAPKKK43 | Bradi1g04080   | 2776045-2779519   |
| OsMAPKKK46 | LOC_Os11g06140 | 2929173-2925595   | BdMAPKKK56 | Bradi4g41940   | 45996792-45999204 |
| OsMAPKKK49 | LOC_Os05g44290 | 25771768-25776102 | BdMAPKKK32 | Bradi2g19590   | 17241445-17245595 |
| OsMAPKKK49 | LOC_Os05g44290 | 25771794-25775926 | BdMAPKKK35 | Bradi2g49700   | 49740523-49744032 |
| OsMAPKKK49 | LOC_Os05g44290 | 25771794-25775926 | OsMAPKKK51 | LOC_Os01g54350 | 31275242-31279385 |
| OsMAPKKK50 | LOC_Os12g02250 | 698969-705122     | BdMAPKKK50 | Bradi4g44430   | 47836156-47839912 |
| OsMAPKKK50 | LOC_Os12g02250 | 698969-705122     | OsMAPKKK53 | LOC_Os11g02305 | 655098-661236     |
| OsMAPKKK51 | LOC_Os01g54350 | 31275242-31279385 | OsMAPKKK49 | LOC_Os05g44290 | 25771794-25775926 |
| OsMAPKKK52 | LOC_Os12g06490 | 3131907-3128498   | BdMAPKKK56 | Bradi4g41940   | 45996792-45999204 |
| OsMAPKKK53 | LOC_Os11g02305 | 655098-661236     | OsMAPKKK50 | LOC_Os12g02250 | 698969-705122     |
| OsMAPKKK54 | LOC_Os03g28300 | 16282710-16290482 | BdMAPKKK24 | Bradi1g60340   | 59671548-59677424 |
| OsMAPKKK56 | LOC_Os05g01780 | 471400-476283     | BdMAPKKK22 | Bradi2g39350   | 39411876-39418219 |
| OsMAPKKK57 | LOC_Os05g46750 | 27068628-27070015 | OsMAPKKK63 | LOC_Os01g50370 | 28921498-28922922 |
| OsMAPKKK59 | LOC_Os12g41260 | 25583204-25586395 | BdMAPKKK41 | Bradi1g14000   | 10874042-10878698 |
| OsMAPKKK59 | LOC_Os12g41260 | 25583204-25586395 | OsMAPKKK27 | LOC_Os03g43760 | 24476060-24480927 |
| OsMAPKKK61 | LOC_Os01g10450 | 5514480-5510516   | BdMAPKKK31 | Bradi2g06260   | 4698348-4702360   |
| OsMAPKKK63 | LOC_Os01g50370 | 28921498-28922922 | OsMAPKKK57 | LOC_Os05g46750 | 27068628-27070015 |
| OsMAPKKK64 | LOC_Os07g39520 | 23677863-23679948 | BdMAPKKK54 | Bradi1g23320   | 18706049-18708119 |
| OsMAPKKK65 | LOC_Os07g43900 | 26250364-26245519 | BdMAPKKK49 | Bradi1g20390   | 16330864-16335462 |
| OsMAPKKK72 | LOC_Os01g54480 | 31337161-31332864 | BdMAPKKK40 | Bradi2g49790   | 49806289-49809892 |
| OsMAPKKK72 | LOC_Os01g54480 | 31337161-31332864 | AtRaf27    | At4g18950      | 10375364-10378390 |
| OsMAPKKK73 | LOC_Os03g18170 | 10184582-10187474 | BdMAPKKK60 | Bradi1g65500   | 64476929-64478355 |
| OsMAPKKK74 | LOC_Os01g66860 | 38818767-38822164 | BdMAPKKK36 | Bradi2g57470   | 55622119-55624811 |
| OsMAPKKK75 | LOC_Os02g39560 | 23876495-23881702 | BdMAPKKK33 | Bradi3g48360   | 49832148-49837407 |
