# Supplementary material for: Genome-wide exploration of the molecular evolution and regulatory network of mitogen-activated protein kinase cascades upon multiple stresses in Brachypodium distachyon
Source: PubMed Central journal article supplement (PMC4404688; doi:10.1186/s12864-015-1452-1), 2015-03-24
Supplement: 12864_2015_1452_MOESM8_ESM.pdf [file 12864_2015_1452_MOESM8_ESM.pdf]

**Additional file 8A-1 Expression data of the *BdMAPK* family genes after abiotic stresses treatment.**

|                  | 4°C 3h      |         |         | 45°C 3h     |         |         | PEG 3h      |         |         | H <sub>2</sub> O <sub>2</sub> 3h |         |         | Nacl 3h     |         |         |
|------------------|-------------|---------|---------|-------------|---------|---------|-------------|---------|---------|----------------------------------|---------|---------|-------------|---------|---------|
|                  | fold-change | p-value | up/down | fold-change | p-value | up/down | fold-change | p-value | up/down | fold-change                      | p-value | up/down | fold-change | p-value | up/down |
| <b>BdMPK3</b>    | 11.6535     | 0.0000  | up      | 1.3961      | 0.0071  |         | 1.0638      | 0.1858  |         | 1.3491                           | 0.0009  |         | 0.5962      | 0.0004  |         |
| <b>BdMPK4</b>    | 0.7864      | 0.0412  |         | 0.3600      | 0.0003  | down    | 0.2749      | 0.0001  | down    | 0.1630                           | 0.0000  | down    | 0.4539      | 0.0257  |         |
| <b>BdMPK6</b>    | 3.0795      | 0.0000  | up      | 1.1780      | 0.0051  |         | 0.7943      | 0.0026  |         | 0.6764                           | 0.0015  |         | 0.2952      | 0.0005  | down    |
| <b>BdMPK7-1</b>  | 1.1811      | 0.2310  |         | 0.3338      | 0.0106  |         | 0.4514      | 0.0027  | down    | 0.7071                           | 0.0508  |         | 0.4718      | 0.0001  | down    |
| <b>BdMPK7-2</b>  | 1.5658      | 0.5324  |         | 0.5369      | 0.3225  |         | 0.5822      | 0.3719  |         | 1.0907                           | 0.8830  |         | 0.9282      | 0.1248  |         |
| <b>BdMPK11</b>   | 1.9048      | 0.0111  |         | 0.5376      | 0.0192  |         | 1.2930      | 0.1073  |         | 0.2338                           | 0.0010  | down    | 0.3071      | 0.0000  | down    |
| <b>BdMPK14</b>   | 2.0775      | 0.0053  | up      | 0.7855      | 0.1234  |         | 1.0552      | 0.6587  |         | 0.5380                           | 0.0195  |         | 0.3659      | 0.0000  | down    |
| <b>BdMPK16</b>   | 5.4391      | 0.0000  | up      | 1.4529      | 0.0002  |         | 1.0625      | 0.1126  |         | 0.3442                           | 0.0000  | down    | 0.4543      | 0.0151  |         |
| <b>BdMPK17</b>   | 9.0092      | 0.0000  | up      | 1.6331      | 0.0000  |         | 1.6548      | 0.0001  |         | 2.0378                           | 0.0000  | up      | 1.3349      | 0.0011  |         |
| <b>BdMPK20-1</b> | 2.9210      | 0.0000  | up      | 1.7503      | 0.0000  |         | 0.9065      | 0.0098  |         | 0.6238                           | 0.0000  |         | 0.4215      | 0.0005  | down    |
| <b>BdMPK20-2</b> | 2.0138      | 0.0000  | up      | 0.6587      | 0.0001  |         | 0.9915      | 0.7606  |         | 0.3712                           | 0.0000  | down    | 0.3848      | 0.0000  | down    |
| <b>BdMPK20-3</b> | 2.8412      | 0.0002  | up      | 1.2559      | 0.0456  |         | 0.4536      | 0.0045  | down    | 0.9485                           | 0.5115  |         | 0.3397      | 0.0047  | down    |
| <b>BdMPK20-4</b> | 4.1072      | 0.0000  | up      | 1.3793      | 0.0014  |         | 0.4362      | 0.0001  | down    | 0.1558                           | 0.0000  | down    | 0.4558      | 0.0020  | down    |
| <b>BdMPK20-5</b> | 0.9183      | 0.0972  |         | 0.3384      | 0.0000  | down    | 0.7373      | 0.0000  |         | 0.1937                           | 0.0000  | down    | 0.3856      | 0.0013  | down    |
| <b>BdMPK21-1</b> | 2.6706      | 0.0005  | up      | 0.8050      | 0.0730  |         | 0.9666      | 0.7511  |         | 0.4693                           | 0.0020  | down    | 0.3124      | 0.0000  | down    |

Additional file 8A-2 Expression data of the *BdMAPK* family genes after abiotic stresses treatment.

|                  | 4°C 6h      |         |         | 45°C 6h     |         |         | PEG 6h      |         |         | H <sub>2</sub> O <sub>2</sub> 6h |         |         | NaCl 6h     |         |         |
|------------------|-------------|---------|---------|-------------|---------|---------|-------------|---------|---------|----------------------------------|---------|---------|-------------|---------|---------|
|                  | fold-change | p-value | up/down | fold-change | p-value | up/down | fold-change | p-value | up/down | fold-change                      | p-value | up/down | fold-change | p-value | up/down |
| <b>BdMPK3</b>    | 4.9111      | 0.0000  | up      | 0.9920      | 0.7231  |         | 0.8759      | 0.0031  |         | 1.8955                           | 0.0008  |         | 0.6579      | 0.0001  |         |
| <b>BdMPK4</b>    | 2.2720      | 0.0001  | up      | 1.9707      | 0.0001  |         | 0.7858      | 0.0208  |         | 1.0926                           | 0.0821  |         | 1.4817      | 0.0007  |         |
| <b>BdMPK6</b>    | 1.7393      | 0.0158  |         | 1.4292      | 0.0006  |         | 0.8376      | 0.0173  |         | 1.1414                           | 0.0416  |         | 0.4800      | 0.0013  | down    |
| <b>BdMPK7-1</b>  | 0.3771      | 0.0065  | down    | 0.9974      | 0.9669  |         | 0.0850      | 0.0000  | down    | 0.2447                           | 0.0002  | down    | 0.5061      | 0.0005  |         |
| <b>BdMPK7-2</b>  | 1.4916      | 0.3921  |         | 0.5929      | 0.2198  |         | 0.5306      | 0.2246  |         | 1.7301                           | 0.2754  |         | 0.6423      | 0.0001  |         |
| <b>BdMPK11</b>   | 1.4738      | 0.3089  |         | 0.8205      | 0.4550  |         | 0.2633      | 0.0031  | down    | 0.9717                           | 0.8694  |         | 0.7193      | 0.0018  |         |
| <b>BdMPK14</b>   | 1.0932      | 0.7104  |         | 2.3155      | 0.0012  | up      | 0.5744      | 0.0106  |         | 4.1052                           | 0.0000  | up      | 0.2822      | 0.0000  | down    |
| <b>BdMPK16</b>   | 6.3005      | 0.0000  | up      | 1.6436      | 0.0004  |         | 0.3863      | 0.0000  | down    | 1.1578                           | 0.0429  |         | 0.9136      | 0.1458  |         |
| <b>BdMPK17</b>   | 7.9386      | 0.0000  | up      | 2.3749      | 0.0002  | up      | 1.6433      | 0.0002  |         | 1.6403                           | 0.0002  |         | 0.9355      | 0.0832  |         |
| <b>BdMPK20-1</b> | 1.4241      | 0.0035  |         | 1.7731      | 0.0002  |         | 0.3211      | 0.0000  | down    | 0.3868                           | 0.0000  | down    | 1.4830      | 0.0260  |         |
| <b>BdMPK20-2</b> | 0.7645      | 0.0001  |         | 0.3668      | 0.0015  | down    | 0.0551      | 0.0000  | down    | 0.4130                           | 0.0000  | down    | 1.4831      | 0.0347  |         |
| <b>BdMPK20-3</b> | 4.9684      | 0.0000  | up      | 2.2099      | 0.0161  |         | 0.4628      | 0.0000  | down    | 5.1672                           | 0.0000  | up      | 0.4179      | 0.0000  | down    |
| <b>BdMPK20-4</b> | 3.8987      | 0.0000  | up      | 1.4295      | 0.0039  |         | 0.0275      | 0.0000  | down    | 0.4642                           | 0.0000  | down    | 1.1548      | 0.4139  |         |
| <b>BdMPK20-5</b> | 0.4916      | 0.0000  | down    | 0.5826      | 0.0000  |         | 0.0503      | 0.0000  | down    | 0.3395                           | 0.0000  | down    | 1.6808      | 0.0753  |         |
| <b>BdMPK21-1</b> | 6.2327      | 0.0003  | up      | 1.2577      | 0.4767  |         | 1.2503      | 0.2612  |         | 9.7254                           | 0.0001  | up      | 0.2792      | 0.0000  | down    |

**Additional file 8B-1 Expression data of the *BdMAPKK* family genes after abiotic stresses treatment.**

|                  | 4°C 3h      |         |         | 45°C 3h     |         |         | PEG 3h      |         |         | H <sub>2</sub> O <sub>2</sub> 3h |         |         | NaCl 3h     |         |         |
|------------------|-------------|---------|---------|-------------|---------|---------|-------------|---------|---------|----------------------------------|---------|---------|-------------|---------|---------|
|                  | fold-change | p-value | up/down | fold-change | p-value | up/down | fold-change | p-value | up/down | fold-change                      | p-value | up/down | fold-change | p-value | up/down |
| <b>BdMKK1</b>    | 1.4958      | 0.0007  |         | 0.5386      | 0.0001  |         | 0.6813      | 0.0017  |         | 0.4863                           | 0.0001  | down    | 0.1803      | 0.0002  | down    |
| <b>BdMKK3-1</b>  | 2.9757      | 0.0000  | up      | 0.8452      | 0.1102  |         | 0.9204      | 0.3009  |         | 1.7097                           | 0.0005  |         | 0.5216      | 0.0000  |         |
| <b>BdMKK3-2</b>  | 5.1906      | 0.0000  | up      | 2.2720      | 0.0002  | up      | 1.9955      | 0.0004  |         | 1.7559                           | 0.0008  |         | 0.2513      | 0.0000  | down    |
| <b>BdMKK3-3</b>  | 2.8605      | 0.0009  | up      | 1.9093      | 0.0050  |         | 4.2744      | 0.0002  | up      | 3.3791                           | 0.0004  | up      | 0.9214      | 0.0458  |         |
| <b>BdMKK4</b>    | 2.9055      | 0.0280  |         | 2.3512      | 0.0156  |         | 1.3667      | 0.4643  |         | 0.8442                           | 0.7323  |         | 0.4662      | 0.0010  | down    |
| <b>BdMKK5</b>    | 1.4282      | 0.4215  |         | 1.3858      | 0.5725  |         | 0.7550      | 0.0249  |         | 1.3001                           | 0.3021  |         | 0.5750      | 0.0025  |         |
| <b>BdMKK6</b>    | 2.2631      | 0.0000  | up      | 1.3857      | 0.0002  |         | 0.7017      | 0.0000  |         | 0.2385                           | 0.0000  | down    | 0.5382      | 0.0000  |         |
| <b>BdMKK10-1</b> | 0.9943      | 0.9943  |         | 0.5090      | 0.3387  |         | 0.5576      | 0.4187  |         | 0.4972                           | 0.6127  |         | 0.4603      | 0.0935  |         |
| <b>BdMKK10-2</b> | 3.8832      | 0.0000  | up      | 1.3459      | 0.0002  |         | 0.6906      | 0.0000  |         | 3.2667                           | 0.0000  | up      | 0.9575      | 0.6624  |         |
| <b>BdMKK10-3</b> | 8.0010      | 0.0095  | up      | 0.0304      | 0.0280  |         | 4.4706      | 0.0005  | up      | 0.8654                           | 0.3517  |         | 0.2882      | 0.0184  |         |
| <b>BdMKK10-5</b> | 1.5438      | 0.0000  |         | 6.7047      | 0.0000  | up      | 1.4813      | 0.0004  |         | 1.3804                           | 0.0024  |         | 2.0765      | 0.0000  | up      |

**Additional file 8B-2 Expression data of the *BdMAPKK* family genes after abiotic stresses treatment.**

|                  | 4°C 6h      |         |         | 45°C 6h     |         |         | PEG 6h      |         |         | H <sub>2</sub> O <sub>2</sub> 6h |         |         | Nacl 6h     |         |         |
|------------------|-------------|---------|---------|-------------|---------|---------|-------------|---------|---------|----------------------------------|---------|---------|-------------|---------|---------|
|                  | fold-change | p-value | up/down | fold-change | p-value | up/down | fold-change | p-value | up/down | fold-change                      | p-value | up/down | fold-change | p-value | up/down |
| <b>BdMKK1</b>    | 0.8014      | 0.0117  |         | 0.4950      | 0.0028  | down    | 0.1947      | 0.0000  | down    | 0.6661                           | 0.0002  |         | 0.6620      | 0.0004  |         |
| <b>BdMKK3-1</b>  | 1.8033      | 0.0014  |         | 0.5716      | 0.0001  |         | 1.0327      | 0.5637  |         | 4.0481                           | 0.0000  | up      | 0.2134      | 0.0000  | down    |
| <b>BdMKK3-2</b>  | 3.6097      | 0.0001  | up      | 0.8039      | 0.0574  |         | 0.7926      | 0.0754  |         | 4.4882                           | 0.0001  | up      | 0.1941      | 0.0000  | down    |
| <b>BdMKK3-3</b>  | 1.9408      | 0.0034  |         | 0.3884      | 0.0001  | down    | 3.2115      | 0.0001  | up      | 8.8085                           | 0.0000  | up      | 0.4561      | 0.0000  | down    |
| <b>BdMKK4</b>    | 0.0775      | 0.0153  |         | 0.5053      | 0.4682  |         | 0.0706      | 0.0131  |         | 2.5075                           | 0.2819  |         | 0.3921      | 0.0355  |         |
| <b>BdMKK5</b>    | 1.0564      | 0.3027  |         | 8.9427      | 0.0000  | up      | 1.1144      | 0.0979  |         | 8.9362                           | 0.0000  | up      | 0.2402      | 0.0008  | down    |
| <b>BdMKK6</b>    | 1.7737      | 0.0004  |         | 1.3989      | 0.0083  |         | 0.1996      | 0.0000  | down    | 2.0132                           | 0.0002  | up      | 0.4417      | 0.0000  | down    |
| <b>BdMKK10-1</b> | 5.1275      | 0.0589  |         | 3.7559      | 0.6016  |         | 0.3579      | 0.6807  |         | 0.8643                           | 0.8994  |         | 0.0004      | 0.1544  |         |
| <b>BdMKK10-2</b> | 1.1456      | 0.0343  |         | 0.9272      | 0.1487  |         | 1.0528      | 0.2797  |         | 7.3364                           | 0.0000  | up      | 0.2757      | 0.0000  | down    |
| <b>BdMKK10-3</b> | 0.0599      | 0.2679  |         | 0.1086      | 0.0797  |         | 0.0010      | 0.0019  | down    | 6.5630                           | 0.1186  |         | 0.6895      | 0.2316  |         |
| <b>BdMKK10-5</b> | 0.7758      | 0.0011  |         | 15.8837     | 0.0000  | up      | 0.3668      | 0.0002  | down    | 0.8199                           | 0.0311  |         | 0.2102      | 0.0000  | down    |

**Additional file 8C-1 Expression data of the *BdMAPKKK* family genes after abiotic stresses treatment.**

|                   | 4°C 3h      |         |         | 45°C 3h     |         |         | PEG 3h      |         |         | H <sub>2</sub> O <sub>2</sub> 3h |         |         | NaCl 3h     |         |         |
|-------------------|-------------|---------|---------|-------------|---------|---------|-------------|---------|---------|----------------------------------|---------|---------|-------------|---------|---------|
|                   | fold-change | p-value | up/down | fold-change | p-value | up/down | fold-change | p-value | up/down | fold-change                      | p-value | up/down | fold-change | p-value | up/down |
| <b>BdMAPKKK1</b>  | 1.4108      | 0.2861  |         | 0.4581      | 0.0072  | down    | 0.2688      | 0.0257  |         | 0.5878                           | 0.2073  |         | 1.1080      | 0.3329  |         |
| <b>BdMAPKKK2</b>  | 1.7019      | 0.0014  |         | 0.4611      | 0.0000  | down    | 0.4646      | 0.0006  | down    | 0.0587                           | 0.0000  | down    | 0.4624      | 0.0012  | down    |
| <b>BdMAPKKK3</b>  | 3.3328      | 0.0028  | up      | 1.1163      | 0.6412  |         | 0.8579      | 0.7991  |         | 0.1138                           | 0.0038  | down    | 0.5833      | 0.0003  |         |
| <b>BdMAPKKK4</b>  | 2.8266      | 0.0000  | up      | 2.4454      | 0.0000  | up      | 4.6403      | 0.0000  | up      | 0.3948                           | 0.0066  | down    | 0.7296      | 0.0042  |         |
| <b>BdMAPKKK5</b>  | 2.3194      | 0.0186  |         | 1.6124      | 0.4227  |         | 0.4627      | 0.1355  |         | 0.0720                           | 0.0035  | down    | 0.7233      | 0.0000  |         |
| <b>BdMAPKKK6</b>  | 5.7655      | 0.0000  | up      | 7.3109      | 0.0383  |         | 1.0967      | 0.4818  |         | 0.1026                           | 0.0014  | down    | 0.8200      | 0.0026  |         |
| <b>BdMAPKKK7</b>  | 1.2198      | 0.2238  |         | 0.5454      | 0.0130  |         | 0.2937      | 0.0099  | down    | 0.0313                           | 0.0002  | down    | 0.4243      | 0.0001  | down    |
| <b>BdMAPKKK8</b>  | 0.8470      | 0.6998  |         | 0.3856      | 0.0458  |         | 0.3598      | 0.0828  |         | 0.1890                           | 0.0150  |         | 0.6577      | 0.0019  |         |
| <b>BdMAPKKK9</b>  | 1.1796      | 0.0179  |         | 0.3865      | 0.0002  | down    | 0.3802      | 0.0004  | down    | 0.0721                           | 0.0001  | down    | 0.3266      | 0.0006  | down    |
| <b>BdMAPKKK10</b> | 1.5466      | 0.1173  |         | 0.4381      | 0.0177  |         | 0.5863      | 0.0861  |         | 0.1794                           | 0.0013  | down    | 0.8598      | 0.1452  |         |
| <b>BdMAPKKK11</b> | 1.1466      | 0.3421  |         | 0.4634      | 0.0027  | down    | 0.3957      | 0.0014  | down    | 0.1738                           | 0.0002  | down    | 0.6904      | 0.0483  |         |
| <b>BdMAPKKK12</b> | 3.3001      | 0.0005  | up      | 1.7640      | 0.0412  |         | 1.1841      | 0.3053  |         | 0.3198                           | 0.0413  |         | 0.6438      | 0.0001  |         |
| <b>BdMAPKKK13</b> | 2.0226      | 0.1025  |         | 0.6982      | 0.3528  |         | 0.7177      | 0.3874  |         | 0.3062                           | 0.0415  |         | 0.8482      | 0.1832  |         |
| <b>BdMAPKKK14</b> | 4.1162      | 0.0058  | up      | 0.2535      | 0.0222  |         | 0.5082      | 0.0680  |         | 1.1060                           | 0.7277  |         | 0.2941      | 0.0027  | down    |
| <b>BdMAPKKK15</b> | 2.6043      | 0.0046  | up      | 0.6391      | 0.0319  |         | 0.6067      | 0.0201  |         | 0.2155                           | 0.0096  | down    | 0.7540      | 0.0026  |         |
| <b>BdMAPKKK16</b> | 2.4008      | 0.0063  | up      | 0.7971      | 0.1662  |         | 0.9058      | 0.4975  |         | 0.7474                           | 0.1894  |         | 0.8282      | 0.0979  |         |
| <b>BdMAPKKK17</b> | 2.3187      | 0.0448  |         | 0.8817      | 0.7102  |         | 0.7812      | 0.4436  |         | 0.1730                           | 0.0207  |         | 0.6081      | 0.0012  |         |
| <b>BdMAPKKK18</b> | 4.9919      | 0.0013  | up      | 2.6022      | 0.0093  | up      | 1.8179      | 0.0397  |         | 0.3580                           | 0.0121  |         | 0.4235      | 0.0000  | down    |
| <b>BdMAPKKK19</b> | 3.0828      | 0.0003  | up      | 1.4435      | 0.0228  |         | 1.2202      | 0.0507  |         | 0.6284                           | 0.0576  |         | 1.1815      | 0.0098  |         |
| <b>BdMAPKKK20</b> | 1.6994      | 0.0483  |         | 0.4341      | 0.0270  |         | 0.8335      | 0.4284  |         | 0.5560                           | 0.0984  |         | 0.5941      | 0.0001  |         |
| <b>BdMAPKKK21</b> | 15.4844     | 0.0002  | up      | 5.8730      | 0.0023  | up      | 1.5745      | 0.1004  |         | 0.8412                           | 0.6082  |         | 3.5312      | 0.0000  | up      |
| <b>BdMAPKKK22</b> | 1.8859      | 0.1692  |         | 0.9909      | 0.9843  |         | 0.8104      | 0.6624  |         | 0.7860                           | 0.5865  |         | 1.0145      | 0.5681  |         |
| <b>BdMAPKKK23</b> | 1.2817      | 0.1400  |         | 1.1540      | 0.3628  |         | 1.4146      | 0.0147  |         | 0.3341                           | 0.0005  | down    | 0.4769      | 0.0005  | down    |
| <b>BdMAPKKK24</b> | 2.7411      | 0.0051  | up      | 0.6225      | 0.0612  |         | 0.3326      | 0.0037  | down    | 0.0676                           | 0.0022  | down    | 0.4598      | 0.0106  |         |

|                   |         |        |        |         |        |        |         |        |         |         |        |          |         |        |      |
|-------------------|---------|--------|--------|---------|--------|--------|---------|--------|---------|---------|--------|----------|---------|--------|------|
| <b>BdMAPKKK25</b> | 1.0762  | 0.4336 | 0.2311 | 0.0000  | down   | 0.7290 | 0.0079  | 0.5929 | 0.0335  | 0.8838  | 0.0032 |          |         |        |      |
| <b>BdMAPKKK26</b> | 1.8600  | 0.0249 | 0.9457 | 0.4575  |        | 1.0775 | 0.6852  | 0.4955 | 0.0195  | 0.6402  | 0.0096 |          |         |        |      |
| <b>BdMAPKKK27</b> | 7.8248  | 0.0005 | up     | 6.5229  | 0.0004 | up     | 2.6788  | 0.0040 | up      | 0.9487  | 0.7592 | 0.7686   | 0.0915  |        |      |
| <b>BdMAPKKK28</b> | 0.6812  | 0.0116 | 0.3290 | 0.0000  | down   | 0.5067 | 0.0000  | 0.5365 | 0.0022  | 0.5994  | 0.0007 |          |         |        |      |
| <b>BdMAPKKK29</b> | 2.8850  | 0.0511 | 0.6698 | 0.3687  |        | 0.5788 | 0.2214  | 0.3786 | 0.0892  | 0.7317  | 0.0560 |          |         |        |      |
| <b>BdMAPKKK30</b> | 18.0785 | 0.0000 | up     | 9.0442  | 0.0000 | up     | 3.6875  | 0.0000 | up      | 1.8431  | 0.0025 | 0.7671   | 0.4743  |        |      |
| <b>BdMAPKKK31</b> | 2.3833  | 0.0614 | 0.2673 | 0.0152  |        | 0.4505 | 0.0697  | 0.6270 | 0.2501  | 0.9979  | 0.9763 |          |         |        |      |
| <b>BdMAPKKK32</b> | 1.7289  | 0.2058 | 0.4658 | 0.0837  |        | 0.8172 | 0.5697  | 0.6954 | 0.3471  | 1.0166  | 0.8903 |          |         |        |      |
| <b>BdMAPKKK33</b> | 2.0077  | 0.0256 | 0.6554 | 0.1170  |        | 0.4361 | 0.0146  | 0.1614 | 0.0046  | down    | 0.4486 | 0.0000   | down    |        |      |
| <b>BdMAPKKK34</b> | 3.1428  | 0.1155 | 0.6002 | 0.3486  |        | 0.6027 | 0.3842  | 1.1613 | 0.7765  | 0.9981  | 0.9727 |          |         |        |      |
| <b>BdMAPKKK35</b> | 3.1714  | 0.0018 | up     | 2.4843  | 0.0180 |        | 0.7330  | 0.1175 | 0.8290  | 0.6328  | 1.1405 | 0.0249   |         |        |      |
| <b>BdMAPKKK36</b> | 7.2796  | 0.0006 | up     | 0.4424  | 0.0162 |        | 0.5817  | 0.0540 | 1.5629  | 0.1691  | 0.4796 | 0.0001   | down    |        |      |
| <b>BdMAPKKK37</b> | 3.3315  | 0.0222 | 1.3679 | 0.4261  |        | 0.7492 | 0.4441  | 0.6471 | 0.3237  | 0.8489  | 0.0081 |          |         |        |      |
| <b>BdMAPKKK38</b> | 2.3209  | 0.0094 | up     | 1.4721  | 0.1758 |        | 0.8602  | 0.4468 | 0.4564  | 0.1099  | 0.7515 | 0.0140   |         |        |      |
| <b>BdMAPKKK39</b> | 3.9018  | 0.0098 | up     | 1.2874  | 0.5007 |        | 1.0017  | 0.9960 | 0.4025  | 0.0630  | 1.4141 | 0.0212   |         |        |      |
| <b>BdMAPKKK40</b> | 2.0211  | 0.1495 | 0.6480 | 0.3178  |        | 0.6676 | 0.3519  | 0.9063 | 0.8101  | 1.0637  | 0.2378 |          |         |        |      |
| <b>BdMAPKKK41</b> | 1.2491  | 0.1208 | 0.6930 | 0.0144  |        | 0.6023 | 0.0016  | 1.4637 | 0.0053  | 1.2879  | 0.0013 |          |         |        |      |
| <b>BdMAPKKK42</b> | 3.1126  | 0.0061 | up     | 0.0512  | 0.0001 | down   | 0.0045  | 0.0000 | down    | 0.3051  | 0.0037 | down     | 0.0811  | 0.0002 | down |
| <b>BdMAPKKK43</b> | 3.2795  | 0.0033 | up     | 0.7665  | 0.2927 |        | 1.4088  | 0.1465 | 0.3720  | 0.0788  | 0.6836 | 0.0000   |         |        |      |
| <b>BdMAPKKK44</b> | 4.9926  | 0.0063 | up     | 1.1869  | 0.5628 |        | 0.6127  | 0.1609 | 0.3043  | 0.0120  | 1.5240 | 0.0329   |         |        |      |
| <b>BdMAPKKK45</b> | 2.9944  | 0.0079 | up     | 0.4617  | 0.0200 |        | 0.7852  | 0.3050 | 1.2858  | 0.2988  | 0.7980 | 0.2126   |         |        |      |
| <b>BdMAPKKK46</b> | 2.5077  | 0.0373 | 0.8112 | 0.5233  |        | 0.8048 | 0.4974  | 0.4057 | 0.0773  | 0.7199  | 0.0368 |          |         |        |      |
| <b>BdMAPKKK47</b> | 2.3455  | 0.0272 | 1.5079 | 0.2199  |        | 0.7304 | 0.2786  | 0.8723 | 0.6188  | 3.3490  | 0.0000 | up       |         |        |      |
| <b>BdMAPKKK48</b> | 1.0654  | 0.5941 | 0.2899 | 0.0002  | down   | 0.6761 | 0.0096  | 0.4663 | 0.0211  | 0.5706  | 0.0005 |          |         |        |      |
| <b>BdMAPKKK49</b> | 3.7778  | 0.0135 | 3.0405 | 0.0218  |        | 0.7240 | 0.3489  | 0.9123 | 0.7783  | 1.6444  | 0.0020 |          |         |        |      |
| <b>BdMAPKKK50</b> | 1.0418  | 0.9464 | 1.8413 | 0.1144  |        | 0.8267 | 0.6270  | 0.5771 | 0.0013  | 0.6240  | 0.1327 |          |         |        |      |
| <b>BdMAPKKK51</b> | 9.5601  | 0.0008 | up     | 4.5122  | 0.0030 | up     | 1.6988  | 0.1160 | 33.0582 | 0.0001  | up     | 103.9945 | 0.0000  | up     |      |
| <b>BdMAPKKK52</b> | 49.0899 | 0.0000 | up     | 1.5718  | 0.0100 |        | 0.7824  | 0.1810 | 2.3534  | 0.0000  | up     | 4.3787   | 0.0039  | up     |      |
| <b>BdMAPKKK53</b> | 3.3627  | 0.0006 | up     | 78.7300 | 0.0000 | up     | 10.9649 | 0.0000 | up      | 12.9934 | 0.0000 | up       | 14.0156 | 0.0001 | up   |

|                   |        |        |        |         |        |         |        |         |         |        |         |        |        |      |
|-------------------|--------|--------|--------|---------|--------|---------|--------|---------|---------|--------|---------|--------|--------|------|
| <b>BdMAPKKK54</b> | 2.3747 | 0.1338 | 1.7664 | 0.0094  | 0.2669 | 0.0001  | down   | 0.0046  | 0.0000  | down   | 0.3977  | 0.0076 | down   |      |
| <b>BdMAPKKK55</b> | 3.0225 | 0.0108 | 1.4900 | 0.1829  | 2.3910 | 0.0211  |        | 0.5697  | 0.0826  |        | 1.6666  | 0.2368 |        |      |
| <b>BdMAPKKK56</b> | 1.2309 | 0.6102 | 1.3594 | 0.4617  | 0.3665 | 0.0526  |        | 0.0790  | 0.0040  | down   | 0.4481  | 0.0017 | down   |      |
| <b>BdMAPKKK57</b> | 0.4451 | 0.0026 | down   | 0.0180  | 0.0000 | down    | 0.9866 | 0.9438  | 2.6549  | 0.0021 | up      | 0.4998 | 0.0162 |      |
| <b>BdMAPKKK58</b> | 3.2629 | 0.0355 | 2.5461 | 0.0074  | up     | 15.9661 | 0.0001 | up      | 11.8081 | 0.0002 | up      | 1.0075 | 0.9843 |      |
| <b>BdMAPKKK59</b> | 2.7741 | 0.0004 | up     | 0.7130  | 0.0128 | 1.0146  | 0.8904 | 2.8346  | 0.0007  | up     | 22.7227 | 0.0009 | up     |      |
| <b>BdMAPKKK60</b> | 0.2571 | 0.0035 | down   | 0.1721  | 0.0001 | down    | 0.0979 | 0.0844  | 0.2914  | 0.0000 | down    | 0.2512 | 0.0003 | down |
| <b>BdMAPKKK61</b> | 0.2766 | 0.0213 | 0.1808 | 0.0020  | down   | 0.4258  | 0.0549 | 0.7264  | 0.3220  | 0.6019 | 0.0163  |        |        |      |
| <b>BdMAPKKK62</b> | 2.1944 | 0.0047 | up     | 5.7740  | 0.0003 | up      | 1.0710 | 0.6265  | 0.6332  | 0.0959 | 1.7133  | 0.0020 |        |      |
| <b>BdMAPKKK63</b> | 1.6018 | 0.0007 | 2.4238 | 0.0098  | up     | 1.5012  | 0.0888 | 0.8665  | 0.4293  | 1.6552 | 0.0051  |        |        |      |
| <b>BdMAPKKK64</b> | 2.4080 | 0.0234 | 0.4333 | 0.0336  | 0.9368 | 0.8089  | 0.8446 | 0.4917  | 0.7179  | 0.1366 |         |        |        |      |
| <b>BdMAPKKK65</b> | 2.5616 | 0.0000 | up     | 0.7510  | 0.1909 | 0.7799  | 0.0619 | 0.2079  | 0.0047  | down   | 0.4620  | 0.0018 | down   |      |
| <b>BdMAPKKK66</b> | 0.9911 | 0.9822 | 0.5641 | 0.1936  | 1.3631 | 0.3626  | 1.5144 | 0.1518  | 0.1806  | 0.0000 | down    |        |        |      |
| <b>BdMAPKKK67</b> | 3.2438 | 0.0000 | up     | 0.6351  | 0.1206 | 0.5886  | 0.0209 | 0.9983  | 0.9959  | 1.4266 | 0.3216  |        |        |      |
| <b>BdMAPKKK68</b> | 1.0993 | 0.3472 | 0.9169 | 0.2501  | 1.1269 | 0.2444  | 0.1731 | 0.0001  | down    | 0.6500 | 0.0098  |        |        |      |
| <b>BdMAPKKK69</b> | 1.6519 | 0.0913 | 5.7863 | 0.0017  | up     | 2.8639  | 0.0105 | 16.1324 | 0.0002  | up     | 11.8599 | 0.0000 | up     |      |
| <b>BdMAPKKK70</b> | 5.5602 | 0.0020 | up     | 1.3268  | 0.3222 | 0.9644  | 0.8928 | 0.4757  | 0.1625  | 1.8956 | 0.0001  |        |        |      |
| <b>BdMAPKKK71</b> | 1.2343 | 0.0004 | 1.2049 | 0.1130  | 1.0046 | 0.4171  | 3.0369 | 0.0001  | up      | 0.8391 | 0.1044  |        |        |      |
| <b>BdMAPKKK72</b> | 2.7625 | 0.0036 | up     | 20.9155 | 0.0001 | up      | 1.6520 | 0.0431  | 3.4298  | 0.0026 | up      | 0.9040 | 0.7735 |      |
| <b>BdMAPKKK73</b> | 1.3406 | 0.3013 | 0.8911 | 0.6768  | 1.5459 | 0.1525  | 0.1823 | 0.0050  | down    | 0.8812 | 0.5821  |        |        |      |
| <b>BdMAPKKK74</b> | 1.1390 | 0.0724 | 0.4469 | 0.0005  | down   | 0.5804  | 0.0009 | 0.4826  | 0.0002  | down   | 0.8903  | 0.1240 |        |      |
| <b>BdMAPKKK75</b> | 1.2199 | 0.2354 | 0.8382 | 0.0002  | 0.6177 | 0.0046  | 0.5097 | 0.0008  | 1.6524  | 0.0000 |         |        |        |      |

**Additional file 8C-2 Expression data of the *BdMAPKKK* family genes after abiotic stresses treatment.**

|                   | 4°C 6h      |         |         | 45°C 6h     |         |         | PEG 6h      |         |         | H <sub>2</sub> O <sub>2</sub> 6h |         |         | NaCl 6h     |         |         |
|-------------------|-------------|---------|---------|-------------|---------|---------|-------------|---------|---------|----------------------------------|---------|---------|-------------|---------|---------|
|                   | fold-change | p-value | up/down | fold-change | p-value | up/down | fold-change | p-value | up/down | fold-change                      | p-value | up/down | fold-change | p-value | up/down |
| <b>BdMAPKKK1</b>  | 5.5153      | 0.0086  | up      | 2.0798      | 0.0399  |         | 0.2702      | 0.0381  |         | 5.3520                           | 0.0042  | up      | 0.8052      | 0.0134  |         |
| <b>BdMAPKKK2</b>  | 2.6708      | 0.0029  | up      | 2.8822      | 0.0021  | up      | 0.3046      | 0.0116  |         | 0.6449                           | 0.1179  |         | 1.6682      | 0.0002  |         |
| <b>BdMAPKKK3</b>  | 2.7702      | 0.0554  |         | 7.4887      | 0.0025  | up      | 0.3376      | 0.1031  |         | 0.3973                           | 0.1171  |         | 2.1256      | 0.0029  | up      |
| <b>BdMAPKKK4</b>  | 0.7652      | 0.0000  |         | 6.9043      | 0.0001  | up      | 0.6969      | 0.0000  |         | 0.4561                           | 0.0002  | down    | 2.4092      | 0.0000  | up      |
| <b>BdMAPKKK5</b>  | 4.1296      | 0.0335  |         | 11.5528     | 0.0030  | up      | 0.4315      | 0.0861  |         | 1.4220                           | 0.3610  |         | 1.5646      | 0.0004  |         |
| <b>BdMAPKKK6</b>  | 2.3953      | 0.0011  | up      | 3.5689      | 0.0229  |         | 0.1937      | 0.0112  |         | 0.3925                           | 0.0211  |         | 2.1342      | 0.0019  | up      |
| <b>BdMAPKKK7</b>  | 1.4636      | 0.1401  |         | 2.7061      | 0.0096  | up      | 0.1534      | 0.0108  |         | 0.3676                           | 0.0218  |         | 1.4381      | 0.0037  |         |
| <b>BdMAPKKK8</b>  | 4.2186      | 0.0209  |         | 1.4221      | 0.4420  |         | 0.6742      | 0.4679  |         | 3.8294                           | 0.0220  |         | 1.3473      | 0.0006  |         |
| <b>BdMAPKKK9</b>  | 0.8841      | 0.2422  |         | 0.8076      | 0.1225  |         | 0.1133      | 0.0003  | down    | 0.3438                           | 0.0004  | down    | 1.6392      | 0.0020  |         |
| <b>BdMAPKKK10</b> | 3.3510      | 0.0000  | up      | 0.9922      | 0.9482  |         | 0.5811      | 0.0028  |         | 1.2902                           | 0.0043  |         | 1.7383      | 0.0192  |         |
| <b>BdMAPKKK11</b> | 2.4703      | 0.0000  | up      | 1.9362      | 0.0001  |         | 0.5446      | 0.0242  |         | 1.2726                           | 0.0018  |         | 1.0343      | 0.6267  |         |
| <b>BdMAPKKK12</b> | 3.6646      | 0.0000  | up      | 2.8386      | 0.0029  | up      | 0.7562      | 0.0005  |         | 0.8270                           | 0.3797  |         | 1.8337      | 0.0005  |         |
| <b>BdMAPKKK13</b> | 2.7498      | 0.0057  | up      | 1.2220      | 0.1080  |         | 0.5168      | 0.1218  |         | 0.5505                           | 0.0039  |         | 1.4107      | 0.0004  |         |
| <b>BdMAPKKK14</b> | 3.8265      | 0.0216  |         | 0.4883      | 0.0228  |         | 0.5749      | 0.1284  |         | 2.5812                           | 0.0044  | up      | 0.8052      | 0.0000  |         |
| <b>BdMAPKKK15</b> | 4.4482      | 0.0005  | up      | 1.4463      | 0.2047  |         | 0.5612      | 0.0041  |         | 0.7869                           | 0.5504  |         | 1.6607      | 0.0010  |         |
| <b>BdMAPKKK16</b> | 3.3186      | 0.0004  | up      | 1.3990      | 0.1573  |         | 0.8247      | 0.1446  |         | 1.3013                           | 0.3081  |         | 1.0639      | 0.0018  |         |
| <b>BdMAPKKK17</b> | 2.4674      | 0.0054  | up      | 1.8019      | 0.0753  |         | 0.2205      | 0.0047  | down    | 0.4953                           | 0.1200  |         | 2.2046      | 0.0017  | up      |
| <b>BdMAPKKK18</b> | 2.1641      | 0.0024  | up      | 8.0830      | 0.0001  | up      | 0.5507      | 0.0077  |         | 0.2282                           | 0.0197  |         | 1.0623      | 0.6860  |         |
| <b>BdMAPKKK19</b> | 5.3386      | 0.0002  | up      | 4.2367      | 0.0006  | up      | 1.7135      | 0.0082  |         | 1.0023                           | 0.9909  |         | 3.1967      | 0.0000  | up      |
| <b>BdMAPKKK20</b> | 2.8196      | 0.0000  | up      | 0.7601      | 0.0242  |         | 0.6566      | 0.0000  |         | 1.0654                           | 0.8339  |         | 1.1507      | 0.0118  |         |
| <b>BdMAPKKK21</b> | 24.5059     | 0.0000  | up      | 26.1910     | 0.0001  | up      | 2.1620      | 0.0059  | up      | 1.1284                           | 0.6735  |         | 3.2035      | 0.0020  | up      |
| <b>BdMAPKKK22</b> | 3.7650      | 0.0388  |         | 2.9563      | 0.0586  |         | 1.1368      | 0.7956  |         | 2.2787                           | 0.0996  |         | 1.0377      | 0.7944  |         |
| <b>BdMAPKKK23</b> | 1.6486      | 0.0062  |         | 1.7846      | 0.0368  |         | 1.0843      | 0.5278  |         | 0.5728                           | 0.0274  |         | 0.7407      | 0.0180  |         |
| <b>BdMAPKKK24</b> | 0.7197      | 0.0711  |         | 0.5448      | 0.0099  |         | 0.0865      | 0.0000  | down    | 0.0470                           | 0.0003  | down    | 0.6499      | 0.0016  |         |
| <b>BdMAPKKK25</b> | 1.4531      | 0.0046  |         | 0.2541      | 0.0007  | down    | 0.5695      | 0.0005  |         | 1.2982                           | 0.2700  |         | 0.4825      | 0.0003  | down    |



|                   |         |        |    |         |        |      |        |        |      |         |        |      |         |        |
|-------------------|---------|--------|----|---------|--------|------|--------|--------|------|---------|--------|------|---------|--------|
| <b>BdMAPKKK26</b> | 1.3009  | 0.0774 |    | 1.0970  | 0.3066 |      | 0.5938 | 0.0000 |      | 0.4122  | 0.0010 | down | 1.2862  | 0.0253 |
| <b>BdMAPKKK27</b> | 0.9967  | 0.9762 |    | 9.9382  | 0.0002 | up   | 0.3428 | 0.0000 | down | 0.3877  | 0.0444 |      | 1.4785  | 0.0013 |
| <b>BdMAPKKK28</b> | 1.1605  | 0.6426 |    | 0.8663  | 0.5649 |      | 1.4148 | 0.1677 |      | 2.0913  | 0.0741 |      | 0.8152  | 0.0002 |
| <b>BdMAPKKK29</b> | 5.7800  | 0.0002 | up | 1.3319  | 0.0585 |      | 0.8718 | 0.3148 |      | 1.2863  | 0.4307 |      | 1.5085  | 0.0001 |
| <b>BdMAPKKK30</b> | 10.7775 | 0.0000 | up | 20.6463 | 0.0000 | up   | 0.7664 | 0.2635 |      | 0.8918  | 0.1072 |      | 0.4583  | 0.0014 |
| <b>BdMAPKKK31</b> | 6.0997  | 0.0003 | up | 0.8980  | 0.5420 |      | 0.8058 | 0.1946 |      | 1.9838  | 0.0476 |      | 1.1482  | 0.2036 |
| <b>BdMAPKKK32</b> | 2.0705  | 0.0112 |    | 1.0327  | 0.8754 |      | 1.1327 | 0.4309 |      | 1.5771  | 0.0896 |      | 1.7244  | 0.0916 |
| <b>BdMAPKKK33</b> | 1.9482  | 0.0170 |    | 0.7405  | 0.1810 |      | 0.2031 | 0.0005 | down | 0.4366  | 0.0364 |      | 1.3677  | 0.0165 |
| <b>BdMAPKKK34</b> | 7.0989  | 0.0073 | up | 1.1205  | 0.8103 |      | 0.8370 | 0.6741 |      | 2.9693  | 0.0214 |      | 0.9348  | 0.1629 |
| <b>BdMAPKKK35</b> | 3.6920  | 0.0000 | up | 6.7243  | 0.0000 | up   | 0.6648 | 0.1397 |      | 1.2143  | 0.0345 |      | 2.9151  | 0.0001 |
| <b>BdMAPKKK36</b> | 41.2858 | 0.0002 | up | 1.6507  | 0.1704 |      | 0.5103 | 0.0568 |      | 1.7173  | 0.1387 |      | 0.9132  | 0.3500 |
| <b>BdMAPKKK37</b> | 6.2793  | 0.0000 | up | 3.8342  | 0.0013 | up   | 1.1265 | 0.4330 |      | 1.5860  | 0.0461 |      | 1.0201  | 0.2669 |
| <b>BdMAPKKK38</b> | 2.6360  | 0.0035 | up | 3.7989  | 0.0019 | up   | 0.4865 | 0.0174 |      | 0.6473  | 0.3453 |      | 1.6925  | 0.0002 |
| <b>BdMAPKKK39</b> | 6.5931  | 0.0000 | up | 2.6502  | 0.0002 | up   | 1.4034 | 0.0614 |      | 1.3830  | 0.1365 |      | 1.8184  | 0.0000 |
| <b>BdMAPKKK40</b> | 4.0695  | 0.0000 | up | 1.8566  | 0.0062 |      | 1.5610 | 0.0008 |      | 2.9001  | 0.0040 | up   | 1.1540  | 0.0281 |
| <b>BdMAPKKK41</b> | 2.7542  | 0.0043 | up | 1.8411  | 0.0102 |      | 1.0353 | 0.8165 |      | 4.9998  | 0.0003 | up   | 1.2135  | 0.0245 |
| <b>BdMAPKKK42</b> | 0.5215  | 0.1399 |    | 0.9137  | 0.8350 |      | 0.1074 | 0.0031 | down | 0.1139  | 0.0035 | down | 4.4810  | 0.0032 |
| <b>BdMAPKKK43</b> | 1.7120  | 0.0016 |    | 2.9715  | 0.0035 | up   | 0.9772 | 0.8859 |      | 1.0582  | 0.3926 |      | 1.2055  | 0.0991 |
| <b>BdMAPKKK44</b> | 7.3178  | 0.0010 | up | 2.5159  | 0.0339 |      | 0.6812 | 0.0276 |      | 0.8340  | 0.1778 |      | 1.4581  | 0.0073 |
| <b>BdMAPKKK45</b> | 4.3505  | 0.0003 | up | 0.7399  | 0.0801 |      | 0.8658 | 0.5499 |      | 3.2358  | 0.0047 | up   | 1.2762  | 0.0432 |
| <b>BdMAPKKK46</b> | 2.4506  | 0.0030 | up | 2.0358  | 0.0399 |      | 0.5211 | 0.0187 |      | 0.7537  | 0.5150 |      | 2.4209  | 0.0171 |
| <b>BdMAPKKK47</b> | 3.2757  | 0.0000 | up | 3.7856  | 0.0000 | up   | 1.1203 | 0.1911 |      | 3.2338  | 0.0001 | up   | 0.7667  | 0.0103 |
| <b>BdMAPKKK48</b> | 0.9361  | 0.6008 |    | 0.2822  | 0.0023 | down | 0.6350 | 0.0943 |      | 1.5898  | 0.1076 |      | 0.8485  | 0.2297 |
| <b>BdMAPKKK49</b> | 5.1204  | 0.0015 | up | 4.8541  | 0.0016 | up   | 1.1381 | 0.5349 |      | 2.3621  | 0.0147 |      | 1.3600  | 0.0055 |
| <b>BdMAPKKK50</b> | 0.4111  | 0.1937 |    | 1.5839  | 0.4193 |      | 0.0476 | 0.0027 | down | 0.0420  | 0.0011 | down | 4.8408  | 0.0026 |
| <b>BdMAPKKK51</b> | 9.0268  | 0.0002 | up | 5.6153  | 0.0000 | up   | 2.7871 | 0.0002 | up   | 44.8628 | 0.0000 | up   | 71.7733 | 0.0000 |
| <b>BdMAPKKK52</b> | 15.6940 | 0.0001 | up | 2.2514  | 0.0074 | up   | 0.5912 | 0.1056 |      | 0.7082  | 0.1264 |      | 3.4440  | 0.0085 |
| <b>BdMAPKKK53</b> | 1.7499  | 0.0046 |    | 33.5506 | 0.0001 | up   | 3.4091 | 0.0017 | up   | 7.8332  | 0.0007 | up   | 9.8739  | 0.0007 |
| <b>BdMAPKKK54</b> | 3.7264  | 0.0038 | up | 5.6214  | 0.0016 | up   | 0.0102 | 0.0001 | down | 0.8215  | 0.4401 |      | 0.4655  | 0.0394 |

|                   |        |        |         |        |        |        |        |        |         |        |        |         |        |        |    |
|-------------------|--------|--------|---------|--------|--------|--------|--------|--------|---------|--------|--------|---------|--------|--------|----|
| <b>BdMAPKKK55</b> | 1.9840 | 0.0093 | 30.6414 | 0.0000 | up     | 0.3934 | 0.0093 | down   | 0.1068  | 0.0000 | down   | 0.5423  | 0.1409 |        |    |
| <b>BdMAPKKK56</b> | 0.9802 | 0.9440 | 3.6310  | 0.0434 |        | 0.4991 | 0.0689 |        | 0.5431  | 0.0829 |        | 1.1911  | 0.0635 |        |    |
| <b>BdMAPKKK57</b> | 1.0600 | 0.6783 | 5.2932  | 0.0002 | up     | 0.7272 | 0.0604 |        | 4.7358  | 0.0002 | up     | 0.9242  | 0.7960 |        |    |
| <b>BdMAPKKK58</b> | 2.9329 | 0.0297 | 74.5161 | 0.0004 | up     | 7.7473 | 0.0018 | up     | 8.8030  | 0.0010 | up     | 95.7290 | 0.0003 | up     |    |
| <b>BdMAPKKK59</b> | 1.9360 | 0.0031 | 3.8266  | 0.0002 | up     | 3.6128 | 0.0001 | up     | 0.0012  | 0.0000 | down   | 0.4688  | 0.0034 | down   |    |
| <b>BdMAPKKK60</b> | 5.2005 | 0.0403 | 7.3681  | 0.0583 |        | 4.3675 | 0.0589 |        | 29.2919 | 0.0037 | up     | 0.8302  | 0.3417 |        |    |
| <b>BdMAPKKK61</b> | 0.1678 | 0.0006 | down    | 3.1397 | 0.0009 | up     | 0.1296 | 0.0000 | down    | 4.1031 | 0.0006 | up      | 0.7536 | 0.2396 |    |
| <b>BdMAPKKK62</b> | 3.6019 | 0.0109 | 6.3067  | 0.0020 | up     | 1.6072 | 0.1312 |        | 2.7019  | 0.0299 |        | 1.5347  | 0.0000 |        |    |
| <b>BdMAPKKK63</b> | 0.6020 | 0.0001 | 1.5316  | 0.1083 |        | 1.0794 | 0.6196 |        | 1.1994  | 0.4301 |        | 4.8071  | 0.0007 | up     |    |
| <b>BdMAPKKK64</b> | 4.0324 | 0.0004 | up      | 0.8608 | 0.3027 |        | 1.4089 | 0.0219 |         | 1.7598 | 0.0503 |         | 0.8452 | 0.0735 |    |
| <b>BdMAPKKK65</b> | 0.8589 | 0.4964 | 1.5073  | 0.1077 |        | 0.1726 | 0.0009 | down   | 0.2437  | 0.0026 | down   | 2.6589  | 0.0000 | up     |    |
| <b>BdMAPKKK66</b> | 0.8195 | 0.6337 | 3.4291  | 0.0000 | up     | 0.6191 | 0.2546 |        | 2.5745  | 0.0038 | up     | 0.9479  | 0.0234 |        |    |
| <b>BdMAPKKK67</b> | 2.0593 | 0.0090 | up      | 1.0418 | 0.8165 |        | 1.4489 | 0.0253 |         | 4.8362 | 0.0013 | up      | 9.6044 | 0.0000 | up |
| <b>BdMAPKKK68</b> | 0.1166 | 0.0017 | down    | 0.8557 | 0.5484 |        | 0.0750 | 0.0012 | down    | 0.0430 | 0.0000 | down    | 2.1324 | 0.0407 |    |
| <b>BdMAPKKK69</b> | 2.2173 | 0.0854 | 12.6345 | 0.0017 | up     | 5.5487 | 0.0065 | up     | 18.4537 | 0.0023 | up     | 16.6947 | 0.0000 | up     |    |
| <b>BdMAPKKK70</b> | 5.9311 | 0.0015 | up      | 3.1442 | 0.0057 | up     | 0.8247 | 0.3839 |         | 0.6632 | 0.1940 |         | 3.7408 | 0.0000 | up |
| <b>BdMAPKKK71</b> | 1.0393 | 0.7611 | 5.3930  | 0.0001 | up     | 0.7808 | 0.1095 |        | 5.1465  | 0.0003 | up     | 0.9416  | 0.5932 |        |    |
| <b>BdMAPKKK72</b> | 1.2869 | 0.1956 | 22.4148 | 0.0007 | up     | 1.3383 | 0.1132 |        | 4.8590  | 0.0000 | up     | 1.6950  | 0.0127 |        |    |
| <b>BdMAPKKK73</b> | 0.4089 | 0.0416 | 3.7308  | 0.0252 |        | 0.1731 | 0.0027 | down   | 0.8588  | 0.6071 |        | 1.3749  | 0.0195 |        |    |
| <b>BdMAPKKK74</b> | 4.9966 | 0.0029 | up      | 1.2279 | 0.5611 |        | 1.5951 | 0.1470 |         | 3.6479 | 0.0061 | up      | 0.9124 | 0.4248 |    |
| <b>BdMAPKKK75</b> | 6.2199 | 0.0080 | up      | 1.6066 | 0.2840 |        | 1.1871 | 0.6431 |         | 2.6280 | 0.0760 |         | 1.3824 | 0.0025 |    |

Additional file 8D Expression data of the *BdMAPK* family genes after heavy metal treatment.

|                  | CdCl <sub>2</sub> 6h |         |         | CdCl <sub>2</sub> 12h |         |         | PbSO <sub>4</sub> 6h |         |         | PbSO <sub>4</sub> 12h |         |         | ZnCl <sub>2</sub> 6h |         |         | ZnCl <sub>2</sub> 12h |         |         |
|------------------|----------------------|---------|---------|-----------------------|---------|---------|----------------------|---------|---------|-----------------------|---------|---------|----------------------|---------|---------|-----------------------|---------|---------|
|                  | fold-change          | p-value | up/down | fold-change           | p-value | up/down | fold-change          | p-value | up/down | fold-change           | p-value | up/down | fold-change          | p-value | up/down | fold-change           | p-value | up/down |
| <b>BdMPK3</b>    | 3.6243               | 0.0000  | up      | 4.6020                | 0.0000  | up      | 1.3618               | 0.0001  |         | 0.4638                | 0.0000  | down    | 0.6195               | 0.0000  |         | 0.7725                | 0.0016  |         |
| <b>BdMPK4</b>    | 1.7802               | 0.0001  |         | 0.8836                | 0.6185  |         | 2.9350               | 0.0000  | up      | 0.5947                | 0.0860  |         | 2.0640               | 0.0000  | up      | 0.9776                | 0.9312  |         |
| <b>BdMPK6</b>    | 2.1157               | 0.0002  | up      | 1.6969                | 0.0026  |         | 0.9421               | 0.3676  |         | 0.6906                | 0.0048  |         | 0.6028               | 0.0006  |         | 0.8553                | 0.0752  |         |
| <b>BdMPK7-1</b>  | 2.4875               | 0.0001  | up      | 0.8931                | 0.0674  |         | 1.4694               | 0.0003  |         | 0.2568                | 0.0000  | down    | 0.6418               | 0.0002  |         | 0.5630                | 0.0010  |         |
| <b>BdMPK7-2</b>  | 2.0798               | 0.0001  | up      | 2.4847                | 0.0001  | up      | 0.9596               | 0.2588  |         | 1.0518                | 0.2278  |         | 0.6081               | 0.0000  |         | 1.3237                | 0.0019  |         |
| <b>BdMPK11</b>   | 1.7464               | 0.0003  |         | 0.9719                | 0.4202  |         | 1.9588               | 0.0032  |         | 0.4987                | 0.0000  | down    | 1.2938               | 0.0038  |         | 0.8559                | 0.0729  |         |
| <b>BdMPK14</b>   | 1.8525               | 0.0000  |         | 1.9502                | 0.0001  |         | 0.8257               | 0.0000  |         | 0.8261                | 0.0005  |         | 0.4516               | 0.0000  | down    | 0.9812                | 0.5042  |         |
| <b>BdMPK16</b>   | 1.8589               | 0.0005  |         | 0.6045                | 0.0026  |         | 2.1304               | 0.0002  | up      | 0.4379                | 0.0004  | down    | 1.5499               | 0.0010  |         | 0.8272                | 0.0737  |         |
| <b>BdMPK17</b>   | 1.3039               | 0.0022  |         | 1.0455                | 0.2209  |         | 0.9286               | 0.0542  |         | 0.6668                | 0.0003  |         | 0.8429               | 0.0065  |         | 0.6796                | 0.0017  |         |
| <b>BdMPK20-1</b> | 1.9647               | 0.0003  |         | 0.5021                | 0.0012  |         | 2.3604               | 0.0002  | up      | 0.3780                | 0.0003  | down    | 1.5845               | 0.0015  |         | 0.7247                | 0.0090  |         |
| <b>BdMPK20-2</b> | 2.7701               | 0.0012  | up      | 0.7351                | 0.0002  |         | 3.4798               | 0.0006  | up      | 0.5229                | 0.0000  |         | 1.8671               | 0.0069  |         | 1.2384                | 0.0011  |         |
| <b>BdMPK20-3</b> | 2.3559               | 0.0001  | up      | 0.9309                | 0.4672  |         | 0.8704               | 0.0142  |         | 0.4296                | 0.0000  | down    | 0.5835               | 0.0001  |         | 0.6530                | 0.0001  |         |
| <b>BdMPK20-4</b> | 2.0411               | 0.0020  | up      | 0.6228                | 0.0000  |         | 2.5186               | 0.0008  | up      | 0.4365                | 0.0000  | down    | 1.7939               | 0.0042  |         | 0.6679                | 0.0004  |         |
| <b>BdMPK20-5</b> | 2.6135               | 0.0004  | up      | 0.9301                | 0.3386  |         | 2.2662               | 0.0001  | up      | 0.3139                | 0.0000  | down    | 1.4307               | 0.0039  |         | 0.6734                | 0.0008  |         |
| <b>BdMPK21-1</b> | 1.1212               | 0.0145  |         | 1.1494                | 0.0431  |         | 0.8247               | 0.0049  |         | 0.9329                | 0.2218  |         | 0.6266               | 0.0008  |         | 1.1460                | 0.0610  |         |

Additional file 8E Expression data of the *BdMAPKK* family genes after heavy metal treatment.

|                  | CdCl <sub>2</sub> 6h |         |         | CdCl <sub>2</sub> 12h |         |         | PbSO <sub>4</sub> 6h |         |         | PbSO <sub>4</sub> 12h |         |         | ZnCl <sub>2</sub> 6h |         |         | ZnCl <sub>2</sub> 12h |         |         |
|------------------|----------------------|---------|---------|-----------------------|---------|---------|----------------------|---------|---------|-----------------------|---------|---------|----------------------|---------|---------|-----------------------|---------|---------|
|                  | fold-change          | p-value | up/down | fold-change           | p-value | up/down | fold-change          | p-value | up/down | fold-change           | p-value | up/down | fold-change          | p-value | up/down | fold-change           | p-value | up/down |
| <b>BdMKK1</b>    | 1.7771               | 0.0000  |         | 0.7502                | 0.1039  |         | 2.1849               | 0.0001  | up      | 0.3525                | 0.0016  | down    | 1.2345               | 0.0023  |         | 0.6216                | 0.0284  |         |
| <b>BdMKK3-1</b>  | 1.5512               | 0.0001  |         | 1.5512                | 0.0000  |         | 0.5568               | 0.0000  |         | 0.9372                | 0.0153  |         | 0.2983               | 0.0022  | down    | 0.8800                | 0.0134  |         |
| <b>BdMKK3-2</b>  | 1.5433               | 0.0003  |         | 1.4241                | 0.0340  |         | 0.6713               | 0.0013  |         | 0.9843                | 0.0361  |         | 0.4582               | 0.0001  | down    | 1.0628                | 0.0231  |         |
| <b>BdMKK3-3</b>  | 3.0541               | 0.0002  | up      | 2.7296                | 0.0000  | up      | 0.5501               | 0.0001  |         | 0.6019                | 0.0000  |         | 0.4004               | 0.0000  | down    | 0.8294                | 0.0032  |         |
| <b>BdMKK4</b>    | 5.3306               | 0.0023  | up      | 1.6177                | 0.0955  |         | 0.3239               | 0.0004  | down    | 0.0916                | 0.0000  | down    | 0.1380               | 0.0008  | down    | 0.7167                | 0.2803  |         |
| <b>BdMKK5</b>    | 2.3659               | 0.1567  |         | 4.1116                | 0.0001  | up      | 2.0957               | 0.4313  |         | 0.2746                | 0.0001  | down    | 0.1842               | 0.0012  | down    | 1.3997                | 0.0157  |         |
| <b>BdMKK6</b>    | 2.0155               | 0.0000  | up      | 1.0116                | 0.4633  |         | 1.4506               | 0.0146  |         | 0.5566                | 0.0000  |         | 0.5749               | 0.0011  |         | 0.8785                | 0.0367  |         |
| <b>BdMKK10-1</b> | 0.0394               | 0.4934  |         | 0.2063                | 0.0036  | down    | 0.0042               | 0.2861  |         | 0.4505                | 0.0903  |         | 0.2275               | 0.7477  |         | 0.1499                | 0.1049  |         |
| <b>BdMKK10-2</b> | 1.9628               | 0.0000  |         | 6.8192                | 0.0000  | up      | 0.6851               | 0.0006  |         | 1.3103                | 0.0001  |         | 0.3738               | 0.0000  | down    | 0.9615                | 0.3620  |         |
| <b>BdMKK10-3</b> | 3.0922               | 0.0299  |         | 0.0881                | 0.2046  |         | 0.0552               | 0.1059  |         | 0.1175                | 0.0013  | down    | 0.2790               | 0.0265  |         | 0.1006                | 0.0051  | down    |
| <b>BdMKK10-5</b> | 1.4477               | 0.0003  |         | 28.9525               | 0.0000  | up      | 0.8292               | 0.0036  |         | 0.5139                | 0.0230  |         | 0.4956               | 0.0000  | down    | 1.6276                | 0.0010  |         |

Additional file 8F Expression data of the *BdMAPKKK* family genes after heavy metal treatment.

|                   | Cdcl <sub>2</sub> 6h |         |         | Cdcl <sub>2</sub> 12h |         |         | PbSO <sub>4</sub> 6h |         |         | PbSO <sub>4</sub> 12h |         |         | Zncl <sub>2</sub> 6h |         |         | Zncl <sub>2</sub> 12h |         |         |
|-------------------|----------------------|---------|---------|-----------------------|---------|---------|----------------------|---------|---------|-----------------------|---------|---------|----------------------|---------|---------|-----------------------|---------|---------|
|                   | fold-change          | p-value | up/down | fold-change           | p-value | up/down | fold-change          | p-value | up/down | fold-change           | p-value | up/down | fold-change          | p-value | up/down | fold-change           | p-value | up/down |
| <b>BdMAPKKK1</b>  | 1.2431               | 0.0009  |         | 2.4113                | 0.0000  | up      | 0.7340               | 0.0003  |         | 0.9920                | 0.8997  |         | 0.5372               | 0.0000  |         | 0.9856                | 0.6969  |         |
| <b>BdMAPKKK2</b>  | 0.5551               | 0.0001  |         | 0.5869                | 0.0080  |         | 1.5316               | 0.0005  |         | 0.4769                | 0.0002  | down    | 0.9351               | 0.0980  |         | 0.4586                | 0.0001  | down    |
| <b>BdMAPKKK3</b>  | 1.4826               | 0.0413  |         | 1.1853                | 0.0253  |         | 1.4670               | 0.0332  |         | 0.3186                | 0.0000  | down    | 0.7849               | 0.1032  |         | 0.3992                | 0.0000  | down    |
| <b>BdMAPKKK4</b>  | 1.5957               | 0.0000  |         | 1.6998                | 0.0021  |         | 1.0269               | 0.1499  |         | 0.2239                | 0.0000  | down    | 0.3358               | 0.0000  | down    | 0.3094                | 0.0000  | down    |
| <b>BdMAPKKK5</b>  | 0.6786               | 0.0008  |         | 0.8640                | 0.0015  |         | 1.3864               | 0.0004  |         | 0.6466                | 0.0001  |         | 0.8380               | 0.0037  |         | 0.7177                | 0.0002  |         |
| <b>BdMAPKKK6</b>  | 1.2113               | 0.0660  |         | 1.1313                | 0.2111  |         | 2.4393               | 0.0003  | up      | 0.6023                | 0.0000  |         | 1.3101               | 0.0241  |         | 0.5007                | 0.0000  |         |
| <b>BdMAPKKK7</b>  | 0.7970               | 0.0019  |         | 1.3270                | 0.0001  |         | 1.8546               | 0.0000  |         | 0.7912                | 0.0001  |         | 1.0204               | 0.4580  |         | 0.9820                | 0.4328  |         |
| <b>BdMAPKKK8</b>  | 1.0372               | 0.3508  |         | 0.8993                | 0.0731  |         | 1.1396               | 0.0440  |         | 0.6942                | 0.0010  |         | 0.7519               | 0.0014  |         | 0.6699                | 0.0008  |         |
| <b>BdMAPKKK9</b>  | 0.6123               | 0.0026  |         | 0.4200                | 0.0001  | down    | 2.7405               | 0.0001  | up      | 0.7063                | 0.0004  |         | 1.6298               | 0.0019  |         | 0.5428                | 0.0001  |         |
| <b>BdMAPKKK10</b> | 1.5687               | 0.0385  |         | 1.5409                | 0.0067  |         | 1.3047               | 0.1443  |         | 0.9154                | 0.3629  |         | 0.9223               | 0.6092  |         | 0.9030                | 0.2831  |         |
| <b>BdMAPKKK11</b> | 1.0316               | 0.7230  |         | 1.0723                | 0.8081  |         | 1.0387               | 0.4309  |         | 0.8307                | 0.2352  |         | 0.7785               | 0.0021  |         | 0.7016                | 0.0551  |         |
| <b>BdMAPKKK12</b> | 0.7622               | 0.0008  |         | 0.7854                | 0.0000  |         | 1.2139               | 0.0002  |         | 0.5949                | 0.0000  |         | 0.8123               | 0.0001  |         | 0.5543                | 0.0000  |         |
| <b>BdMAPKKK13</b> | 0.9044               | 0.4314  |         | 0.9425                | 0.2076  |         | 0.9953               | 0.8221  |         | 0.8123                | 0.0073  |         | 0.8418               | 0.0863  |         | 0.7496                | 0.0019  |         |
| <b>BdMAPKKK14</b> | 0.7593               | 0.0002  |         | 1.9528                | 0.0000  |         | 0.6168               | 0.0000  |         | 0.9359                | 0.1743  |         | 0.5289               | 0.0000  |         | 0.9045                | 0.0005  |         |
| <b>BdMAPKKK15</b> | 0.3999               | 0.0000  | down    | 0.6646                | 0.0015  |         | 1.2791               | 0.0008  |         | 0.8381                | 0.0109  |         | 1.0563               | 0.0675  |         | 0.6870                | 0.0006  |         |
| <b>BdMAPKKK16</b> | 1.2060               | 0.1662  |         | 1.5777                | 0.0000  |         | 1.0691               | 0.0049  |         | 0.6373                | 0.0000  |         | 0.6356               | 0.0001  |         | 0.6395                | 0.0001  |         |
| <b>BdMAPKKK17</b> | 0.5583               | 0.0004  |         | 0.4836                | 0.0012  | down    | 1.8954               | 0.0002  |         | 0.6995                | 0.0042  |         | 1.4235               | 0.0024  |         | 0.5733                | 0.0008  |         |
| <b>BdMAPKKK18</b> | 2.0101               | 0.0074  | up      | 0.7119                | 0.0980  |         | 1.0671               | 0.6642  |         | 0.2126                | 0.0001  | down    | 0.3333               | 0.0022  | down    | 0.3019                | 0.0000  | down    |
| <b>BdMAPKKK19</b> | 1.8074               | 0.0002  |         | 1.4803                | 0.0135  |         | 1.2353               | 0.0009  |         | 0.7141                | 0.0001  |         | 0.8226               | 0.0006  |         | 0.6719                | 0.0001  |         |
| <b>BdMAPKKK20</b> | 1.4498               | 0.0012  |         | 2.0934                | 0.0000  | up      | 0.9629               | 0.3483  |         | 0.8327                | 0.0011  |         | 0.7048               | 0.0003  |         | 0.8525                | 0.0292  |         |
| <b>BdMAPKKK21</b> | 0.5758               | 0.0005  |         | 1.1860                | 0.0127  |         | 1.0947               | 0.1856  |         | 0.9168                | 0.0581  |         | 1.0765               | 0.1900  |         | 0.7595                | 0.0014  |         |
| <b>BdMAPKKK22</b> | 1.5395               | 0.0000  |         | 2.2935                | 0.0000  | up      | 0.9354               | 0.0993  |         | 1.0481                | 0.0482  |         | 0.5983               | 0.0001  |         | 0.9577                | 0.1663  |         |
| <b>BdMAPKKK23</b> | 1.0344               | 0.5764  |         | 0.3937                | 0.0014  | down    | 1.3292               | 0.0082  |         | 0.5274                | 0.0000  |         | 0.5369               | 0.0012  |         | 0.6852                | 0.0000  |         |
| <b>BdMAPKKK24</b> | 0.8664               | 0.0469  |         | 0.5330                | 0.0185  |         | 0.9728               | 0.6372  |         | 0.7527                | 0.1559  |         | 0.6898               | 0.0097  |         | 0.6991                | 0.4082  |         |
| <b>BdMAPKKK25</b> | 2.1476               | 0.0000  | up      | 0.7424                | 0.0001  |         | 1.2786               | 0.0005  |         | 0.6874                | 0.0000  |         | 0.4492               | 0.0000  | down    | 0.7937                | 0.0013  |         |

|                   |         |        |        |          |        |         |        |        |        |        |        |        |        |         |        |        |
|-------------------|---------|--------|--------|----------|--------|---------|--------|--------|--------|--------|--------|--------|--------|---------|--------|--------|
| <b>BdMAPKKK26</b> | 1.2522  | 0.0034 | 0.7072 | 0.3367   |        | 1.3557  | 0.0121 | 0.2493 | 0.0001 | down   | 0.3371 | 0.0000 | down   | 0.1510  | 0.0011 | down   |
| <b>BdMAPKKK27</b> | 1.7224  | 0.0055 | 2.5835 | 0.0001   | up     | 0.9752  | 0.6184 | 0.3430 | 0.0000 | down   | 0.3200 | 0.0000 | down   | 0.4637  | 0.0001 | down   |
| <b>BdMAPKKK28</b> | 1.2884  | 0.0025 | 1.0733 | 0.5106   |        | 1.2115  | 0.0004 | 1.0121 | 0.8921 |        | 0.7787 | 0.0128 |        | 1.4799  | 0.0005 |        |
| <b>BdMAPKKK29</b> | 1.3224  | 0.0050 | 1.6630 | 0.0039   |        | 1.1610  | 0.0336 | 1.0159 | 0.8557 |        | 0.8203 | 0.0018 |        | 1.0040  | 0.9633 |        |
| <b>BdMAPKKK30</b> | 2.2543  | 0.0024 | up     | 5.3243   | 0.0179 | 0.2935  | 0.0003 | down   | 0.4981 | 0.1667 | 0.2085 | 0.0025 | down   | 0.9678  | 0.9308 |        |
| <b>BdMAPKKK31</b> | 0.9671  | 0.6392 | 1.1939 | 0.0001   |        | 0.7750  | 0.1031 | 0.6999 | 0.0037 |        | 0.7526 | 0.0884 |        | 0.8706  | 0.1830 |        |
| <b>BdMAPKKK32</b> | 2.9256  | 0.0121 | 3.2823 | 0.0000   | up     | 1.3585  | 0.2824 | 0.8328 | 0.0214 |        | 0.7028 | 0.2360 |        | 0.8561  | 0.0364 |        |
| <b>BdMAPKKK33</b> | 0.9990  | 0.9921 | 0.7010 | 0.0014   |        | 1.3652  | 0.0069 | 0.6134 | 0.0003 |        | 1.1474 | 0.0892 |        | 0.6635  | 0.0001 |        |
| <b>BdMAPKKK34</b> | 1.7751  | 0.0000 | 4.5569 | 0.0000   | up     | 0.7854  | 0.0002 | 0.8874 | 0.0620 |        | 0.4305 | 0.0000 | down   | 0.9407  | 0.2604 |        |
| <b>BdMAPKKK35</b> | 2.4369  | 0.0002 | up     | 3.4252   | 0.0000 | up      | 1.3286 | 0.0124 | 0.7442 | 0.0000 | 0.7642 | 0.0141 |        | 0.5430  | 0.0000 |        |
| <b>BdMAPKKK36</b> | 1.3015  | 0.0198 | 0.8197 | 0.0282   |        | 1.6239  | 0.0014 | 0.3506 | 0.0000 | down   | 0.9630 | 0.5769 |        | 0.1698  | 0.0018 | down   |
| <b>BdMAPKKK37</b> | 1.3660  | 0.0004 | 1.8116 | 0.0003   |        | 1.2638  | 0.0121 | 1.0264 | 0.4143 |        | 0.8541 | 0.0431 |        | 0.8142  | 0.0029 |        |
| <b>BdMAPKKK38</b> | 1.4730  | 0.0000 | 1.5646 | 0.0001   |        | 1.8619  | 0.0000 | 0.7215 | 0.0001 |        | 0.9518 | 0.4930 |        | 0.6658  | 0.0001 |        |
| <b>BdMAPKKK39</b> | 2.0044  | 0.0000 | up     | 2.3012   | 0.0003 | up      | 0.8259 | 0.0101 | 1.0195 | 0.8254 | 0.6909 | 0.0007 |        | 1.2215  | 0.0546 |        |
| <b>BdMAPKKK40</b> | 1.6241  | 0.0000 | 2.8649 | 0.0001   | up     | 1.2019  | 0.0007 | 1.2111 | 0.0053 |        | 0.5927 | 0.0000 |        | 1.3073  | 0.0016 |        |
| <b>BdMAPKKK41</b> | 1.7448  | 0.0006 | 2.6798 | 0.0000   | up     | 0.9942  | 0.9189 | 1.0573 | 0.0497 |        | 0.5081 | 0.0002 |        | 1.0348  | 0.2697 |        |
| <b>BdMAPKKK42</b> | 2.5215  | 0.0261 | 3.9275 | 0.0000   | up     | 2.6089  | 0.0342 | 0.7894 | 0.5220 |        | 0.3328 | 0.0180 |        | 1.3265  | 0.0687 |        |
| <b>BdMAPKKK43</b> | 1.9688  | 0.0000 | 1.7876 | 0.0008   |        | 2.3669  | 0.0000 | up     | 0.6121 | 0.0004 | 0.8700 | 0.0024 |        | 0.5051  | 0.0001 |        |
| <b>BdMAPKKK44</b> | 1.0241  | 0.4995 | 1.7268 | 0.0039   |        | 0.9546  | 0.7730 | 0.9493 | 0.5942 |        | 0.5544 | 0.0005 |        | 0.7687  | 0.0466 |        |
| <b>BdMAPKKK45</b> | 3.0728  | 0.0001 | up     | 1.8925   | 0.0346 | 1.0447  | 0.6070 | 0.6493 | 0.0004 |        | 0.6499 | 0.0048 |        | 0.6259  | 0.0000 |        |
| <b>BdMAPKKK46</b> | 1.6036  | 0.0816 | 1.3365 | 0.0251   |        | 3.1941  | 0.0032 | up     | 1.1902 | 0.0956 | 2.7062 | 0.0055 | up     | 0.9599  | 0.6963 |        |
| <b>BdMAPKKK47</b> | 1.5001  | 0.0002 | 2.6230 | 0.0001   | up     | 1.1690  | 0.0056 | 1.9108 | 0.0003 |        | 0.4798 | 0.0001 | down   | 1.8125  | 0.0006 |        |
| <b>BdMAPKKK48</b> | 1.4040  | 0.0505 | 0.8355 | 0.0595   |        | 1.4286  | 0.0201 | 0.5480 | 0.0077 |        | 0.6171 | 0.0081 |        | 0.4843  | 0.0001 | down   |
| <b>BdMAPKKK49</b> | 1.8436  | 0.0002 | 4.5185 | 0.0000   | up     | 1.0806  | 0.2791 | 1.4479 | 0.0095 |        | 0.5934 | 0.0004 |        | 1.1175  | 0.0886 |        |
| <b>BdMAPKKK50</b> | 1.4190  | 0.1216 | 0.7308 | 0.1503   |        | 0.5174  | 0.0087 | 0.1044 | 0.0002 | down   | 0.8319 | 0.4164 |        | 0.1731  | 0.0006 | down   |
| <b>BdMAPKKK51</b> | 52.5030 | 0.0000 | up     | 290.7587 | 0.0000 | up      | 0.9318 | 0.0002 | 0.5352 | 0.0003 | 0.4357 | 0.0000 | down   | 0.4387  | 0.0001 | down   |
| <b>BdMAPKKK52</b> | 15.9118 | 0.0000 | up     | 8.8028   | 0.0003 | up      | 0.6022 | 0.1171 | 0.2344 | 0.0001 | down   | 1.6741 | 0.0579 | 0.3486  | 0.0055 | down   |
| <b>BdMAPKKK53</b> | 41.9267 | 0.0000 | up     | 909.7584 | 0.0000 | up      | 0.8914 | 0.5360 | 3.8594 | 0.0001 | up     | 0.6197 | 0.1004 | 15.6724 | 0.0011 | up     |
| <b>BdMAPKKK54</b> | 0.8079  | 0.3635 | 2.3529 | 0.0082   | up     | 45.1552 | 0.0001 | up     | 0.1338 | 0.0001 | down   | 0.1086 | 0.0007 | down    | 0.6022 | 0.0678 |

|                   |         |        |      |          |        |      |        |        |      |        |        |        |        |        |         |        |        |      |
|-------------------|---------|--------|------|----------|--------|------|--------|--------|------|--------|--------|--------|--------|--------|---------|--------|--------|------|
| <b>BdMAPKKK55</b> | 0.2109  | 0.0008 | down | 2.8384   | 0.0505 |      | 0.3788 | 0.0079 | down | 0.2825 | 0.0237 | 0.1693 | 0.0004 | down   | 0.5519  | 0.2054 |        |      |
| <b>BdMAPKKK56</b> | 0.7210  | 0.0162 |      | 0.3014   | 0.0004 | down | 1.4428 | 0.0056 |      | 0.6757 | 0.0045 | 1.1786 | 0.2113 |        | 0.9562  | 0.6327 |        |      |
| <b>BdMAPKKK57</b> | 8.4316  | 0.0105 |      | 1.7063   | 0.0415 |      | 1.7637 | 0.1236 |      | 0.1351 | 0.0011 | down   | 0.1564 | 0.0176 | 0.2426  | 0.0010 | down   |      |
| <b>BdMAPKKK58</b> | 80.5300 | 0.0000 | up   | 30.4128  | 0.0000 | up   | 1.3384 | 0.2049 |      | 0.3715 | 0.0000 | down   | 1.9140 | 0.0140 | 0.3268  | 0.0045 | down   |      |
| <b>BdMAPKKK59</b> | 2.6465  | 0.0001 | up   | 216.6854 | 0.0000 | up   | 0.2402 | 0.0003 | down | 3.0613 | 0.0462 | 0.0056 | 0.0000 | down   | 81.6736 | 0.0000 | up     |      |
| <b>BdMAPKKK60</b> | 0.1904  | 0.0002 | down | 0.3808   | 0.0003 | down | 0.0405 | 0.0000 | down | 0.3358 | 0.0057 | down   | 0.4084 | 0.0018 | down    | 0.3787 | 0.0290 |      |
| <b>BdMAPKKK61</b> | 1.4190  | 0.2611 |      | 0.7483   | 0.0999 |      | 0.8663 | 0.4899 |      | 0.2096 | 0.0003 | down   | 0.2864 | 0.0030 | down    | 0.4659 | 0.0049 | down |
| <b>BdMAPKKK62</b> | 0.9220  | 0.1206 |      | 2.6382   | 0.0000 | up   | 0.6908 | 0.0001 |      | 1.6044 | 0.0001 |        | 0.5929 | 0.0081 |         | 1.5819 | 0.0533 |      |
| <b>BdMAPKKK63</b> | 2.0576  | 0.0002 | up   | 1.2090   | 0.2992 |      | 1.3323 | 0.0404 |      | 1.0163 | 0.8701 | 0.8348 | 0.0000 |        | 0.5962  | 0.0053 |        |      |
| <b>BdMAPKKK64</b> | 1.5549  | 0.0002 |      | 1.6367   | 0.0001 |      | 0.9712 | 0.3466 |      | 0.9346 | 0.0730 | 0.6534 | 0.0001 |        | 0.8832  | 0.0087 |        |      |
| <b>BdMAPKKK65</b> | 0.8578  | 0.0470 |      | 0.4234   | 0.0009 | down | 2.0634 | 0.0000 | up   | 0.6313 | 0.0007 |        | 1.2950 | 0.0002 |         | 0.5737 | 0.0004 |      |
| <b>BdMAPKKK66</b> | 1.7215  | 0.0000 |      | 0.5850   | 0.0044 |      | 0.7225 | 0.0000 |      | 0.1097 | 0.0000 | down   | 0.3977 | 0.0000 | down    | 0.1405 | 0.0000 | down |
| <b>BdMAPKKK67</b> | 3.0110  | 0.0000 | up   | 2.9927   | 0.0006 | up   | 1.4060 | 0.0000 |      | 0.7475 | 0.0193 | 0.5707 | 0.0000 |        | 0.3765  | 0.0002 | down   |      |
| <b>BdMAPKKK68</b> | 0.0430  | 0.0002 | down | 0.1258   | 0.0007 | down | 0.8152 | 0.1475 |      | 0.2383 | 0.0068 | down   | 0.6003 | 0.0163 |         | 0.2405 | 0.0058 | down |
| <b>BdMAPKKK69</b> | 15.7226 | 0.0000 | up   | 49.7689  | 0.0000 | up   | 1.4300 | 0.0372 |      | 0.5575 | 0.0045 | 0.4690 | 0.0013 | down   | 0.6277  | 0.0282 |        |      |
| <b>BdMAPKKK70</b> | 1.0122  | 0.8948 |      | 1.0501   | 0.7323 |      | 1.5453 | 0.0002 |      | 1.2908 | 0.0000 | 1.1901 | 0.0635 |        | 1.0267  | 0.2126 |        |      |
| <b>BdMAPKKK71</b> | 4.9421  | 0.0001 | up   | 9.3525   | 0.0000 | up   | 0.9654 | 0.7607 |      | 0.3054 | 0.0002 | down   | 0.2166 | 0.0001 | down    | 0.4475 | 0.0014 | down |
| <b>BdMAPKKK72</b> | 5.9766  | 0.0049 | up   | 6.7654   | 0.0008 | up   | 0.9397 | 0.6250 |      | 0.3602 | 0.0253 | 0.3981 | 0.0021 | down   | 0.5127  | 0.0699 |        |      |
| <b>BdMAPKKK73</b> | 0.7570  | 0.0789 |      | 1.5779   | 0.0227 |      | 0.4547 | 0.0033 | down | 0.3425 | 0.0045 | down   | 0.1988 | 0.0018 | down    | 0.6750 | 0.0395 |      |
| <b>BdMAPKKK74</b> | 1.9164  | 0.0001 |      | 2.4282   | 0.0004 | up   | 0.7094 | 0.0007 |      | 0.9179 | 0.0234 | 0.6201 | 0.0007 |        | 1.0485  | 0.1149 |        |      |
| <b>BdMAPKKK75</b> | 2.0363  | 0.0002 | up   | 2.9244   | 0.0000 | up   | 0.4759 | 0.0000 | down | 2.6893 | 0.0001 | up     | 0.8740 | 0.1856 | 1.9209  | 0.0001 |        |      |

Additional file 8G Expression data of the *BdMAPK* family genes after phytohormone treatment.

|                  | ABA 3h      |         |         | ABA 6h      |         |         | JA 3h       |         |         | JA 6h       |         |         | SA 3h       |         |         | SA 6h       |         |         |
|------------------|-------------|---------|---------|-------------|---------|---------|-------------|---------|---------|-------------|---------|---------|-------------|---------|---------|-------------|---------|---------|
|                  | fold-change | p-value | up/down | fold-change | p-value | up/down | fold-change | p-value | up/down | fold-change | p-value | up/down | fold-change | p-value | up/down | fold-change | p-value | up/down |
| <b>BdMPK3</b>    | 0.8304      | 0.0502  |         | 0.5477      | 0.0000  |         | 0.2014      | 0.2541  |         | 0.6355      | 0.0012  |         | 3.4890      | 0.0000  | up      | 4.2512      | 0.0000  | up      |
| <b>BdMPK4</b>    | 0.3248      | 0.0002  | down    | 1.3210      | 0.0019  |         | 0.1749      | 0.0000  | down    | 0.3837      | 0.0010  | down    | 0.3838      | 0.0006  | down    | 1.7738      | 0.0002  |         |
| <b>BdMPK6</b>    | 0.9488      | 0.2667  |         | 0.5313      | 0.0204  |         | 0.8561      | 0.0186  |         | 0.5075      | 0.0001  |         | 0.7485      | 0.0006  |         | 1.0917      | 0.1128  |         |
| <b>BdMPK7-1</b>  | 1.5517      | 0.0267  |         | 1.2895      | 0.0429  |         | 2.1245      | 0.0057  | up      | 0.5264      | 0.0114  |         | 0.2865      | 0.0015  | down    | 0.2027      | 0.0042  | down    |
| <b>BdMPK7-2</b>  | 1.5076      | 0.5193  |         | 0.9864      | 0.9720  |         | 1.9634      | 0.2784  |         | 0.4789      | 0.1131  |         | 0.5883      | 0.3786  |         | 0.9841      | 0.9799  |         |
| <b>BdMPK11</b>   | 0.8250      | 0.2540  |         | 0.3835      | 0.0128  |         | 0.4246      | 0.0078  | down    | 0.3523      | 0.0027  | down    | 0.6983      | 0.0447  |         | 0.4376      | 0.0143  |         |
| <b>BdMPK14</b>   | 0.7145      | 0.0117  |         | 0.6775      | 0.0026  |         | 0.6602      | 0.0278  |         | 0.4531      | 0.0033  | down    | 0.4961      | 0.0001  | down    | 0.3935      | 0.0000  | down    |
| <b>BdMPK16</b>   | 1.5649      | 0.0001  |         | 0.9208      | 0.1027  |         | 1.1628      | 0.0632  |         | 0.7504      | 0.0002  |         | 1.3117      | 0.0015  |         | 0.5124      | 0.0008  |         |
| <b>BdMPK17</b>   | 2.0983      | 0.0000  | up      | 1.4842      | 0.0004  |         | 0.7372      | 0.0002  |         | 0.4479      | 0.0000  | down    | 2.0438      | 0.0000  | up      | 2.6387      | 0.0000  | up      |
| <b>BdMPK20-1</b> | 1.1031      | 0.0010  |         | 0.7684      | 0.0108  |         | 1.4820      | 0.0000  |         | 0.3554      | 0.0215  |         | 1.5773      | 0.0000  |         | 0.8679      | 0.0198  |         |
| <b>BdMPK20-2</b> | 1.7402      | 0.0000  |         | 0.7487      | 0.0061  |         | 1.4645      | 0.0001  |         | 0.3813      | 0.0012  | down    | 1.6492      | 0.0002  |         | 0.1692      | 0.0000  | down    |
| <b>BdMPK20-3</b> | 0.8733      | 0.1567  |         | 1.0025      | 0.0208  |         | 1.3437      | 0.0170  |         | 0.4564      | 0.0068  | down    | 1.2941      | 0.0298  |         | 0.4684      | 0.0013  | down    |
| <b>BdMPK20-4</b> | 0.5421      | 0.0001  |         | 0.2763      | 0.0000  | down    | 0.4757      | 0.0000  | down    | 0.2799      | 0.0000  | down    | 1.3620      | 0.0009  |         | 0.1394      | 0.0000  | down    |
| <b>BdMPK20-5</b> | 0.9857      | 0.3732  |         | 0.4788      | 0.0000  | down    | 2.1693      | 0.0000  | up      | 1.1240      | 0.0007  |         | 0.1930      | 0.0000  | down    | 0.0361      | 0.0000  | down    |
| <b>BdMPK21-1</b> | 1.0989      | 0.5347  |         | 2.2029      | 0.0086  | up      | 1.9789      | 0.0010  |         | 0.7718      | 0.1769  |         | 1.9662      | 0.0010  |         | 1.8224      | 0.0233  |         |



**Additional file 8H Expression data of the *BdMAPKK* family genes after phytohormone treatment.**

|                  | ABA 3h      |         |         | ABA 6h      |         |         | JA 3h       |         |         | JA 6h       |         |         | SA 3h       |         |         | SA 6h       |         |         |
|------------------|-------------|---------|---------|-------------|---------|---------|-------------|---------|---------|-------------|---------|---------|-------------|---------|---------|-------------|---------|---------|
|                  | fold-change | p-value | up/down | fold-change | p-value | up/down | fold-change | p-value | up/down | fold-change | p-value | up/down | fold-change | p-value | up/down | fold-change | p-value | up/down |
| <b>BdMKK1</b>    | 0.7009      | 0.0010  |         | 0.3915      | 0.0000  | down    | 0.7274      | 0.0016  |         | 0.3790      | 0.0000  | down    | 0.8817      | 0.0380  |         | 0.6775      | 0.0001  |         |
| <b>BdMKK3-1</b>  | 1.5681      | 0.0036  |         | 1.0791      | 0.0443  |         | 1.7395      | 0.0003  |         | 0.5553      | 0.0001  |         | 1.8228      | 0.0017  |         | 1.8161      | 0.0001  |         |
| <b>BdMKK3-2</b>  | 2.5613      | 0.0003  | up      | 0.5837      | 0.0029  |         | 2.2748      | 0.0002  | up      | 0.2796      | 0.0002  | down    | 3.2640      | 0.0001  | up      | 1.1293      | 0.2162  |         |
| <b>BdMKK3-3</b>  | 7.7182      | 0.0001  | up      | 1.8373      | 0.0008  |         | 2.1846      | 0.0023  | up      | 0.1927      | 0.0001  | down    | 9.7501      | 0.0000  | up      | 3.3051      | 0.0000  | up      |
| <b>BdMKK4</b>    | 1.3858      | 0.2769  |         | 0.1286      | 0.0350  |         | 2.2490      | 0.3028  |         | 0.5185      | 0.5130  |         | 0.6938      | 0.1419  |         | 1.1496      | 0.8926  |         |
| <b>BdMKK5</b>    | 1.0300      | 0.7325  |         | 0.5360      | 0.0028  |         | 0.9095      | 0.3756  |         | 0.3874      | 0.0003  | down    | 0.4968      | 0.0084  | down    | 3.2689      | 0.0000  | up      |
| <b>BdMKK6</b>    | 1.1126      | 0.0699  |         | 0.9130      | 0.1385  |         | 0.9166      | 0.0377  |         | 0.2961      | 0.0009  | down    | 1.3569      | 0.0003  |         | 0.3245      | 0.0000  | down    |
| <b>BdMKK10-1</b> | 1.4719      | 0.6253  |         | 1.6477      | 0.4357  |         | 0.6712      | 0.7072  |         | 0.7120      | 0.6230  |         | 0.0901      | 0.2631  |         | 0.6234      | 0.4071  |         |
| <b>BdMKK10-2</b> | 0.8002      | 0.0000  |         | 1.1647      | 0.0180  |         | 4.9562      | 0.0000  | up      | 2.0235      | 0.0026  | up      | 5.7786      | 0.0000  | up      | 5.2924      | 0.0000  | up      |
| <b>BdMKK10-3</b> | 1.8313      | 0.0629  |         | 1.9432      | 0.5237  |         | 0.0076      | 0.0000  | down    | 0.1796      | 0.2067  |         | 0.3155      | 0.6545  |         | 9.9166      | 0.0742  |         |
| <b>BdMKK10-5</b> | 0.4626      | 0.0006  | down    | 0.5980      | 0.0006  |         | 1.1715      | 0.0001  |         | 0.6599      | 0.0275  |         | 1.6193      | 0.0865  |         | 3.0096      | 0.0001  | up      |

**Additional file 8I Expression data of the *BdMAPKKK* family genes after phytohormone treatment.**

|                   | ABA 3h      |         |         | ABA 6h      |         |         | JA 3h       |         |         | JA 6h       |         |         | SA 3h       |         |         | SA 6h       |         |         |
|-------------------|-------------|---------|---------|-------------|---------|---------|-------------|---------|---------|-------------|---------|---------|-------------|---------|---------|-------------|---------|---------|
|                   | fold-change | p-value | up/down | fold-change | p-value | up/down | fold-change | p-value | up/down | fold-change | p-value | up/down | fold-change | p-value | up/down | fold-change | p-value | up/down |
| <b>BdMAPKKK1</b>  | 0.3333      | 0.0454  |         | 0.7072      | 0.3858  |         | 0.4083      | 0.0039  | down    | 0.8485      | 0.5362  |         | 0.7483      | 0.0691  |         | 0.9185      | 0.8129  |         |
| <b>BdMAPKKK2</b>  | 0.9366      | 0.4808  |         | 1.0635      | 0.8908  |         | 0.3124      | 0.0000  | down    | 0.8053      | 0.2564  |         | 0.4294      | 0.0000  | down    | 0.6926      | 0.1023  |         |
| <b>BdMAPKKK3</b>  | 2.6183      | 0.0321  |         | 2.4571      | 0.0497  |         | 0.3994      | 0.0001  | down    | 1.0457      | 0.8897  |         | 0.9661      | 0.7310  |         | 1.5011      | 0.2456  |         |
| <b>BdMAPKKK4</b>  | 15.9114     | 0.0000  | up      | 4.7318      | 0.0000  | up      | 1.0336      | 0.1638  |         | 0.6434      | 0.1491  |         | 0.7269      | 0.0001  |         | 1.2321      | 0.0690  |         |
| <b>BdMAPKKK5</b>  | 0.6731      | 0.3461  |         | 0.8695      | 0.7855  |         | 0.5676      | 0.1765  |         | 0.6652      | 0.4318  |         | 1.3198      | 0.3788  |         | 1.5717      | 0.2383  |         |
| <b>BdMAPKKK6</b>  | 1.6193      | 0.0007  |         | 1.3382      | 0.0996  |         | 0.5660      | 0.0067  |         | 0.5711      | 0.1063  |         | 0.6192      | 0.0152  |         | 0.4290      | 0.0434  |         |
| <b>BdMAPKKK7</b>  | 0.9395      | 0.7320  |         | 1.1396      | 0.5718  |         | 0.5952      | 0.0189  |         | 0.8582      | 0.6423  |         | 0.5979      | 0.0207  |         | 0.8758      | 0.5993  |         |
| <b>BdMAPKKK8</b>  | 0.4459      | 0.1738  |         | 1.0626      | 0.8868  |         | 0.3754      | 0.0472  |         | 0.3551      | 0.0602  |         | 0.3485      | 0.0459  |         | 0.4829      | 0.1304  |         |
| <b>BdMAPKKK9</b>  | 0.8523      | 0.0612  |         | 0.8188      | 0.0688  |         | 0.2845      | 0.0005  | down    | 0.4866      | 0.0020  | down    | 0.5229      | 0.0138  |         | 0.4468      | 0.0136  |         |
| <b>BdMAPKKK10</b> | 0.7328      | 0.2579  |         | 0.8413      | 0.1575  |         | 0.3968      | 0.0145  |         | 0.4083      | 0.0189  |         | 0.5843      | 0.0673  |         | 0.4992      | 0.0277  |         |
| <b>BdMAPKKK11</b> | 0.5557      | 0.0311  |         | 0.8124      | 0.0206  |         | 0.2674      | 0.0003  | down    | 0.2867      | 0.0036  | down    | 0.2224      | 0.0011  | down    | 0.2039      | 0.0037  | down    |
| <b>BdMAPKKK12</b> | 1.0826      | 0.5588  |         | 1.4106      | 0.0000  |         | 0.6209      | 0.0145  |         | 0.8534      | 0.0000  |         | 1.0390      | 0.7535  |         | 0.8557      | 0.1965  |         |
| <b>BdMAPKKK13</b> | 0.8739      | 0.7103  |         | 0.8438      | 0.1630  |         | 0.5294      | 0.1259  |         | 0.7444      | 0.0197  |         | 0.7473      | 0.4201  |         | 0.6911      | 0.0142  |         |
| <b>BdMAPKKK14</b> | 0.9979      | 0.9946  |         | 1.2914      | 0.0064  |         | 0.8054      | 0.4912  |         | 0.7699      | 0.0072  |         | 0.5430      | 0.0803  |         | 0.6818      | 0.2084  |         |
| <b>BdMAPKKK15</b> | 0.7773      | 0.1678  |         | 1.1608      | 0.0677  |         | 0.3341      | 0.0010  | down    | 0.8763      | 0.1646  |         | 1.0852      | 0.5600  |         | 0.9053      | 0.3782  |         |
| <b>BdMAPKKK16</b> | 0.7492      | 0.1866  |         | 0.8946      | 0.2772  |         | 0.3995      | 0.0027  | down    | 0.5056      | 0.0024  |         | 0.7321      | 0.0761  |         | 0.8724      | 0.2153  |         |
| <b>BdMAPKKK17</b> | 1.3086      | 0.4306  |         | 1.1690      | 0.4558  |         | 0.5825      | 0.1317  |         | 0.8477      | 0.3677  |         | 0.9831      | 0.9553  |         | 0.3175      | 0.0518  |         |
| <b>BdMAPKKK18</b> | 3.1890      | 0.0045  | up      | 1.4946      | 0.0083  |         | 0.6172      | 0.0748  |         | 0.5368      | 0.0300  |         | 0.4111      | 0.0588  |         | 0.7432      | 0.2332  |         |
| <b>BdMAPKKK19</b> | 1.3113      | 0.0839  |         | 2.1858      | 0.0021  | up      | 0.4481      | 0.0004  | down    | 0.6285      | 0.0120  |         | 1.3975      | 0.0157  |         | 1.8271      | 0.0115  |         |
| <b>BdMAPKKK20</b> | 0.8258      | 0.3798  |         | 0.9002      | 0.1654  |         | 0.5232      | 0.0250  |         | 0.5556      | 0.0000  |         | 0.4508      | 0.0128  |         | 0.8322      | 0.0879  |         |
| <b>BdMAPKKK21</b> | 0.9801      | 0.9267  |         | 3.1706      | 0.0005  | up      | 2.5928      | 0.0160  |         | 5.5680      | 0.0001  | up      | 4.0392      | 0.0023  | up      | 7.4201      | 0.0001  | up      |
| <b>BdMAPKKK22</b> | 0.7061      | 0.5025  |         | 1.3055      | 0.5603  |         | 0.8110      | 0.5383  |         | 0.6632      | 0.4162  |         | 0.6363      | 0.3659  |         | 1.0950      | 0.8257  |         |
| <b>BdMAPKKK23</b> | 1.6943      | 0.0122  |         | 1.5107      | 0.0104  |         | 0.2991      | 0.0016  | down    | 0.3389      | 0.0003  | down    | 0.1161      | 0.0000  | down    | 0.1067      | 0.0001  | down    |
| <b>BdMAPKKK24</b> | 0.5788      | 0.0396  |         | 0.0889      | 0.0003  | down    | 0.3693      | 0.0056  | down    | 0.1561      | 0.0006  | down    | 0.1742      | 0.0008  | down    | 0.0767      | 0.0001  | down    |
| <b>BdMAPKKK25</b> | 0.6433      | 0.0029  |         | 0.6330      | 0.0108  |         | 0.2792      | 0.0004  | down    | 0.2667      | 0.0001  | down    | 0.1183      | 0.0000  | down    | 0.1584      | 0.0027  | down    |

|                   |          |        |    |           |        |      |         |        |      |         |        |      |          |        |      |         |        |      |
|-------------------|----------|--------|----|-----------|--------|------|---------|--------|------|---------|--------|------|----------|--------|------|---------|--------|------|
| <b>BdMAPKKK26</b> | 1.6724   | 0.0015 |    | 0.8740    | 0.0278 |      | 0.3092  | 0.0021 | down | 0.1079  | 0.0016 | down | 2.4286   | 0.0002 | up   | 0.7090  | 0.1127 |      |
| <b>BdMAPKKK27</b> | 5.6625   | 0.0004 | up | 1.4965    | 0.0005 |      | 4.3023  | 0.0044 | up   | 1.6838  | 0.0073 |      | 4.1754   | 0.0091 | up   | 1.2491  | 0.4795 |      |
| <b>BdMAPKKK28</b> | 0.7146   | 0.0064 |    | 1.4187    | 0.1526 |      | 0.5345  | 0.0018 |      | 0.7813  | 0.2620 |      | 0.3737   | 0.0000 | down | 0.8102  | 0.3305 |      |
| <b>BdMAPKKK29</b> | 0.6444   | 0.3149 |    | 0.8808    | 0.1500 |      | 0.4720  | 0.1201 |      | 0.7634  | 0.0162 |      | 0.7477   | 0.4843 |      | 0.8266  | 0.0912 |      |
| <b>BdMAPKKK30</b> | 2.3066   | 0.0286 |    | 0.2982    | 0.0199 |      | 1.4048  | 0.0000 |      | 0.1822  | 0.0000 | down | 0.5150   | 0.0635 |      | 3.1828  | 0.0006 | up   |
| <b>BdMAPKKK31</b> | 0.4075   | 0.0505 |    | 0.7096    | 0.0390 |      | 0.3291  | 0.0313 |      | 0.4870  | 0.0043 | down | 0.5195   | 0.1134 |      | 1.0050  | 0.9761 |      |
| <b>BdMAPKKK32</b> | 0.9608   | 0.9157 |    | 1.4714    | 0.0417 |      | 0.3724  | 0.0524 |      | 0.6001  | 0.0177 |      | 0.4188   | 0.0657 |      | 0.6148  | 0.0264 |      |
| <b>BdMAPKKK33</b> | 0.5344   | 0.0454 |    | 0.4275    | 0.0033 | down | 0.4564  | 0.0186 |      | 0.6863  | 0.0491 |      | 0.4625   | 0.0185 |      | 0.2163  | 0.0028 | down |
| <b>BdMAPKKK34</b> | 0.5280   | 0.3208 |    | 0.6938    | 0.4050 |      | 0.9590  | 0.9299 |      | 0.4060  | 0.0612 |      | 1.0254   | 0.9639 |      | 1.4826  | 0.3107 |      |
| <b>BdMAPKKK35</b> | 0.7636   | 0.1934 |    | 1.6583    | 0.0354 |      | 1.0150  | 0.9273 |      | 1.0238  | 0.8437 |      | 1.0694   | 0.7422 |      | 2.0408  | 0.0002 | up   |
| <b>BdMAPKKK36</b> | 0.5225   | 0.0379 |    | 0.9817    | 0.9440 |      | 0.4593  | 0.0185 |      | 1.0455  | 0.8644 |      | 0.4662   | 0.0200 |      | 0.4572  | 0.0389 |      |
| <b>BdMAPKKK37</b> | 0.7411   | 0.4310 |    | 1.4613    | 0.0241 |      | 0.5552  | 0.1534 |      | 0.9417  | 0.3725 |      | 1.1754   | 0.6488 |      | 2.3958  | 0.0002 | up   |
| <b>BdMAPKKK38</b> | 1.0583   | 0.7879 |    | 1.0698    | 0.6871 |      | 0.5730  | 0.0326 |      | 0.6941  | 0.0841 |      | 0.6982   | 0.1342 |      | 0.8136  | 0.3892 |      |
| <b>BdMAPKKK39</b> | 0.9194   | 0.7904 |    | 1.4223    | 0.0067 |      | 0.5922  | 0.1532 |      | 0.8743  | 0.2905 |      | 0.7473   | 0.4312 |      | 0.9082  | 0.6338 |      |
| <b>BdMAPKKK40</b> | 0.7504   | 0.5077 |    | 1.6730    | 0.0009 |      | 1.0899  | 0.8421 |      | 1.3080  | 0.0164 |      | 1.4131   | 0.4141 |      | 3.3623  | 0.0005 | up   |
| <b>BdMAPKKK41</b> | 0.6433   | 0.0343 |    | 1.3696    | 0.0578 |      | 0.7315  | 0.0356 |      | 1.0552  | 0.6887 |      | 0.7872   | 0.0137 |      | 1.7505  | 0.0143 |      |
| <b>BdMAPKKK42</b> | 0.7526   | 0.5276 |    | 1.8139    | 0.1685 |      | 2.8013  | 0.0395 |      | 1.6918  | 0.2743 |      | 6.9559   | 0.0008 | up   | 0.4438  | 0.1074 |      |
| <b>BdMAPKKK43</b> | 1.4587   | 0.1263 |    | 1.9717    | 0.0008 |      | 1.0623  | 0.7651 |      | 0.7203  | 0.0326 |      | 0.6145   | 0.0624 |      | 0.6384  | 0.0587 |      |
| <b>BdMAPKKK44</b> | 0.5128   | 0.1304 |    | 0.7827    | 0.2913 |      | 0.5828  | 0.1800 |      | 1.1529  | 0.4801 |      | 1.3331   | 0.3945 |      | 1.7779  | 0.0932 |      |
| <b>BdMAPKKK45</b> | 0.9578   | 0.8707 |    | 0.8947    | 0.4493 |      | 0.7660  | 0.2603 |      | 0.6951  | 0.0400 |      | 0.4091   | 0.0117 |      | 0.5696  | 0.0135 |      |
| <b>BdMAPKKK46</b> | 0.7059   | 0.3116 |    | 1.0030    | 0.9851 |      | 0.6627  | 0.2343 |      | 1.2697  | 0.1485 |      | 0.6732   | 0.2511 |      | 0.6973  | 0.2057 |      |
| <b>BdMAPKKK47</b> | 0.3781   | 0.0175 |    | 0.7898    | 0.0042 |      | 0.1431  | 0.0017 | down | 0.1790  | 0.0000 | down | 0.5403   | 0.0689 |      | 1.2468  | 0.0553 |      |
| <b>BdMAPKKK48</b> | 0.6755   | 0.0419 |    | 0.6550    | 0.0223 |      | 0.5310  | 0.0038 |      | 0.8108  | 0.1564 |      | 0.2106   | 0.0000 | down | 0.3543  | 0.0020 | down |
| <b>BdMAPKKK49</b> | 0.6020   | 0.1919 |    | 0.8247    | 0.3696 |      | 0.7014  | 0.3207 |      | 0.8781  | 0.5370 |      | 0.9584   | 0.8968 |      | 1.3685  | 0.2107 |      |
| <b>BdMAPKKK50</b> | 4.6665   | 0.0010 | up | 1.2163    | 0.6115 |      | 1.2773  | 0.3196 |      | 0.1864  | 0.0264 |      | 0.8800   | 0.3201 |      | 0.1942  | 0.0178 |      |
| <b>BdMAPKKK51</b> | 1.0284   | 0.9226 |    | 1.4894    | 0.0050 |      | 30.8565 | 0.0002 | up   | 11.3941 | 0.0000 | up   | 27.7630  | 0.0002 | up   | 35.1312 | 0.0000 | up   |
| <b>BdMAPKKK52</b> | 2.3627   | 0.0156 |    | 1.4664    | 0.3315 |      | 79.5148 | 0.0000 | up   | 16.2239 | 0.0001 | up   | 11.9021  | 0.0006 | up   | 1.5931  | 0.1679 |      |
| <b>BdMAPKKK53</b> | 9.5582   | 0.0003 | up | 3.4782    | 0.0004 | up   | 8.1960  | 0.0000 | up   | 7.6233  | 0.0001 | up   | 15.2253  | 0.0000 | up   | 12.2872 | 0.0000 | up   |
| <b>BdMAPKKK54</b> | 485.1608 | 0.0000 | up | 1753.9443 | 0.0000 | up   | 1.5292  | 0.2829 |      | 10.0388 | 0.0005 | up   | 491.4942 | 0.0001 | up   | 2.7340  | 0.0208 |      |

|                   |          |        |        |          |        |        |    |         |        |      |        |        |         |         |        |      |
|-------------------|----------|--------|--------|----------|--------|--------|----|---------|--------|------|--------|--------|---------|---------|--------|------|
| <b>BdMAPKKK55</b> | 0.7657   | 0.3301 | 0.6206 | 0.0372   | 6.3452 | 0.0013 | up | 25.0828 | 0.0003 | up   | 0.7208 | 0.2793 | 16.1444 | 0.0000  | up     |      |
| <b>BdMAPKKK56</b> | 0.5554   | 0.1946 | 0.5617 | 0.1320   | 0.2909 | 0.0432 |    | 0.5322  | 0.0928 |      | 0.1861 | 0.0106 | 0.2252  | 0.0222  |        |      |
| <b>BdMAPKKK57</b> | 1.3125   | 0.1210 | 1.1164 | 0.3848   | 0.7276 | 0.2901 |    | 0.1451  | 0.0000 | down | 0.1175 | 0.0038 | down    | 0.8553  | 0.2687 |      |
| <b>BdMAPKKK58</b> | 105.8135 | 0.0000 | up     | 211.0281 | 0.0001 | up     |    | 3.0807  | 0.0080 | up   | 6.4661 | 0.0087 | up      | 3.6675  | 0.0032 | up   |
| <b>BdMAPKKK59</b> | 2.1559   | 0.0028 | up     | 8.0272   | 0.0001 | up     |    | 0.0030  | 0.0000 | down | 8.8270 | 0.0000 | up      | 0.0028  | 0.0000 | down |
| <b>BdMAPKKK60</b> | 0.4240   | 0.2594 |        | 0.6303   | 0.7502 |        |    | 0.9996  | 0.9941 |      | 0.5386 | 0.3547 |         | 0.0485  | 0.0154 |      |
| <b>BdMAPKKK61</b> | 0.4391   | 0.0312 |        | 0.1348   | 0.0012 | down   |    | 0.5115  | 0.0662 |      | 0.6492 | 0.3388 |         | 0.0409  | 0.0005 | down |
| <b>BdMAPKKK62</b> | 1.4462   | 0.0656 |        | 2.1782   | 0.0365 |        |    | 0.5912  | 0.0335 |      | 0.5405 | 0.0794 |         | 1.7911  | 0.0115 |      |
| <b>BdMAPKKK63</b> | 2.6435   | 0.0002 | up     | 1.8348   | 0.0017 |        |    | 4.4816  | 0.0001 | up   | 1.5855 | 0.0148 |         | 27.8611 | 0.0000 | up   |
| <b>BdMAPKKK64</b> | 1.0510   | 0.8483 |        | 1.5584   | 0.0166 |        |    | 0.6566  | 0.2964 |      | 0.8056 | 0.0882 |         | 1.0766  | 0.7685 |      |
| <b>BdMAPKKK65</b> | 1.5069   | 0.0043 |        | 1.5436   | 0.0792 |        |    | 0.6081  | 0.0001 |      | 0.7329 | 0.2201 |         | 0.8073  | 0.0042 |      |
| <b>BdMAPKKK66</b> | 1.5780   | 0.3269 |        | 0.6570   | 0.2078 |        |    | 1.2669  | 0.3597 |      | 0.2896 | 0.0000 | down    | 0.8292  | 0.4739 |      |
| <b>BdMAPKKK67</b> | 0.9825   | 0.7026 |        | 0.5433   | 0.0262 |        |    | 7.8679  | 0.0007 | up   | 7.9706 | 0.0000 | up      | 1.3765  | 0.0016 |      |
| <b>BdMAPKKK68</b> | 0.1467   | 0.0050 | down   | 0.9126   | 0.7626 |        |    | 0.2924  | 0.0038 | down | 0.0722 | 0.0001 | down    | 0.3610  | 0.0374 |      |
| <b>BdMAPKKK69</b> | 6.5310   | 0.0026 | up     | 27.4913  | 0.0003 | up     |    | 2.2873  | 0.0576 |      | 3.6320 | 0.0103 |         | 1.2232  | 0.4422 |      |
| <b>BdMAPKKK70</b> | 1.5543   | 0.2179 |        | 1.4600   | 0.1137 |        |    | 0.4882  | 0.0478 |      | 0.6309 | 0.0926 |         | 1.6356  | 0.1086 |      |
| <b>BdMAPKKK71</b> | 0.8535   | 0.0127 |        | 0.5158   | 0.0049 |        |    | 0.6929  | 0.0043 |      | 0.3513 | 0.0011 | down    | 0.6121  | 0.0002 |      |
| <b>BdMAPKKK72</b> | 1.5776   | 0.0494 |        | 0.7324   | 0.0071 |        |    | 1.1830  | 0.3244 |      | 0.8037 | 0.0752 |         | 1.2911  | 0.3627 |      |
| <b>BdMAPKKK73</b> | 3.1498   | 0.0084 | up     | 2.1853   | 0.0471 |        |    | 1.0952  | 0.7225 |      | 0.9143 | 0.7507 |         | 1.1434  | 0.6023 |      |
| <b>BdMAPKKK74</b> | 0.6691   | 0.0016 |        | 1.1118   | 0.7113 |        |    | 0.6851  | 0.5515 |      | 0.6132 | 0.1167 |         | 0.3335  | 0.0003 | down |
| <b>BdMAPKKK75</b> | 0.5367   | 0.0020 |        | 0.6938   | 0.4054 |        |    | 0.3931  | 0.0265 |      | 0.5602 | 0.1688 |         | 0.5684  | 0.0009 |      |

Additional file 8J Expression data of the *BdMAPK* family genes after biotic stresses treatment.

|                  | pH14 4h     |         |         | pH14 12h    |         |         | Guy11 4h    |         |         | Guy11 12h   |         |         | F0968 4h    |         |         | F0968 12h   |         |         |
|------------------|-------------|---------|---------|-------------|---------|---------|-------------|---------|---------|-------------|---------|---------|-------------|---------|---------|-------------|---------|---------|
|                  | fold-change | p-value | up/down | fold-change | p-value | up/down | fold-change | p-value | up/down | fold-change | p-value | up/down | fold-change | p-value | up/down | fold-change | p-value | up/down |
| <b>BdMPK3</b>    | 0.7979      | 0.0595  |         | 0.6917      | 0.0002  |         | 0.9005      | 0.0433  |         | 0.9745      | 0.4045  |         | 0.4990      | 0.0000  | down    | 0.5982      | 0.0001  |         |
| <b>BdMPK4</b>    | 0.4587      | 0.0000  | down    | 0.2845      | 0.0000  | down    | 0.3316      | 0.0000  | down    | 0.4940      | 0.0001  | down    | 0.2345      | 0.0000  | down    | 0.3985      | 0.0001  | down    |
| <b>BdMPK6</b>    | 0.6426      | 0.0010  |         | 0.4205      | 0.0000  | down    | 0.5785      | 0.0001  |         | 0.8121      | 0.0093  |         | 0.3703      | 0.0000  | down    | 0.4343      | 0.0001  | down    |
| <b>BdMPK7-1</b>  | 0.4386      | 0.0011  | down    | 0.3413      | 0.0008  | down    | 0.2765      | 0.0001  | down    | 0.6092      | 0.0222  |         | 0.2797      | 0.0001  | down    | 0.1862      | 0.0000  | down    |
| <b>BdMPK7-2</b>  | 1.0537      | 0.8439  |         | 0.4893      | 0.0052  | down    | 1.0819      | 0.5785  |         | 0.9895      | 0.9399  |         | 0.3308      | 0.0010  | down    | 0.3640      | 0.0081  | down    |
| <b>BdMPK11</b>   | 0.3910      | 0.0034  | down    | 0.2130      | 0.0014  | down    | 0.2413      | 0.0001  | down    | 0.4901      | 0.1006  |         | 0.2343      | 0.0003  | down    | 0.6168      | 0.0050  |         |
| <b>BdMPK14</b>   | 1.5592      | 0.1470  |         | 0.8099      | 0.3418  |         | 0.8486      | 0.3367  |         | 1.2002      | 0.6321  |         | 0.7059      | 0.0353  |         | 0.7307      | 0.0105  |         |
| <b>BdMPK16</b>   | 0.3713      | 0.0001  | down    | 0.3290      | 0.0005  | down    | 0.4860      | 0.0006  | down    | 0.8165      | 0.0285  |         | 0.2041      | 0.0092  | down    | 0.2420      | 0.0000  | down    |
| <b>BdMPK17</b>   | 1.6681      | 0.0125  |         | 0.8307      | 0.1936  |         | 0.8763      | 0.5334  |         | 1.2736      | 0.1208  |         | 0.6319      | 0.0446  |         | 0.7265      | 0.0550  |         |
| <b>BdMPK20-1</b> | 1.0285      | 0.1209  |         | 0.4862      | 0.0249  |         | 0.8279      | 0.0006  |         | 1.6843      | 0.0000  |         | 0.6526      | 0.0004  |         | 0.9621      | 0.1188  |         |
| <b>BdMPK20-2</b> | 0.2495      | 0.0004  | down    | 0.3546      | 0.0005  | down    | 0.3568      | 0.0006  | down    | 0.5251      | 0.0043  |         | 0.2821      | 0.0002  | down    | 0.3364      | 0.0005  | down    |
| <b>BdMPK20-3</b> | 0.6164      | 0.0028  |         | 0.2747      | 0.0000  | down    | 0.6067      | 0.0011  |         | 1.0175      | 0.8244  |         | 0.3800      | 0.0002  | down    | 0.5323      | 0.0004  |         |
| <b>BdMPK20-4</b> | 0.7066      | 0.0056  |         | 0.2454      | 0.0024  | down    | 0.4066      | 0.0002  | down    | 0.9795      | 0.8158  |         | 0.3016      | 0.0001  | down    | 0.3662      | 0.0001  | down    |
| <b>BdMPK20-5</b> | 0.2955      | 0.0001  | down    | 0.4264      | 0.0004  | down    | 0.4782      | 0.0010  | down    | 0.7766      | 0.0663  |         | 0.3501      | 0.0002  | down    | 0.3593      | 0.0004  | down    |
| <b>BdMPK21-1</b> | 0.2129      | 0.0001  | down    | 0.1453      | 0.0000  | down    | 0.2672      | 0.0001  | down    | 0.3117      | 0.0003  | down    | 0.1852      | 0.0000  | down    | 0.1800      | 0.0000  | down    |

Additional file 8K Expression data of the *BdMAPKK* family genes after biotic stresses treatment.

|                  | pH14 4h     |         |         | pH14 12h    |         |         | Guy11 4h    |         |         | Guy11 12h   |         |         | F0968 4h    |         |         | F0968 12h   |         |         |
|------------------|-------------|---------|---------|-------------|---------|---------|-------------|---------|---------|-------------|---------|---------|-------------|---------|---------|-------------|---------|---------|
|                  | fold-change | p-value | up/down | fold-change | p-value | up/down | fold-change | p-value | up/down | fold-change | p-value | up/down | fold-change | p-value | up/down | fold-change | p-value | up/down |
| <b>BdMKK1</b>    | 0.3320      | 0.0000  | down    | 0.1891      | 0.0021  | down    | 0.2760      | 0.0000  | down    | 0.4376      | 0.0001  | down    | 0.2435      | 0.0000  | down    | 0.2549      | 0.0000  | down    |
| <b>BdMKK3-1</b>  | 0.8628      | 0.2745  |         | 0.5024      | 0.0045  |         | 0.7228      | 0.0512  |         | 0.9237      | 0.5354  |         | 0.5837      | 0.0103  |         | 0.8372      | 0.2001  |         |
| <b>BdMKK3-2</b>  | 0.8488      | 0.0476  |         | 0.5105      | 0.0032  |         | 0.5965      | 0.0028  |         | 1.1520      | 0.1680  |         | 0.4329      | 0.0003  | down    | 0.7692      | 0.1373  |         |
| <b>BdMKK3-3</b>  | 0.2753      | 0.0000  | down    | 0.1091      | 0.0000  | down    | 0.1804      | 0.0000  | down    | 0.3046      | 0.0000  | down    | 0.1315      | 0.0000  | down    | 0.1858      | 0.0000  | down    |
| <b>BdMKK4</b>    | 0.2185      | 0.0475  |         | 0.3573      | 0.0127  |         | 1.3496      | 0.5149  |         | 1.7446      | 0.0918  |         | 1.3321      | 0.7642  |         | 1.1048      | 0.8256  |         |
| <b>BdMKK5</b>    | 0.3076      | 0.0004  | down    | 0.2909      | 0.0003  | down    | 0.2850      | 0.0003  | down    | 0.5644      | 0.0052  |         | 0.3221      | 0.0010  | down    | 0.2322      | 0.0003  | down    |
| <b>BdMKK6</b>    | 1.0055      | 0.9726  |         | 0.4283      | 0.0049  | down    | 0.7114      | 0.0889  |         | 0.9206      | 0.6571  |         | 0.6089      | 0.0326  |         | 0.7533      | 0.1407  |         |
| <b>BdMKK10-1</b> | 0.1589      | 0.2668  |         | 1.0641      | 0.9364  |         | 1.9835      | 0.0951  |         | 0.0306      | 0.0018  | down    | 3.9837      | 0.0206  |         | 0.0735      | 0.0041  | down    |
| <b>BdMKK10-2</b> | 1.3642      | 0.0016  |         | 0.4706      | 0.0000  | down    | 1.0849      | 0.0051  |         | 1.4490      | 0.0009  |         | 0.7104      | 0.0000  |         | 0.8312      | 0.0064  |         |
| <b>BdMKK10-3</b> | 0.0436      | 0.0001  | down    | 0.0570      | 0.0044  | down    | 0.0037      | 0.0000  | down    | 0.8376      | 0.4960  |         | 0.0398      | 0.0206  |         | 0.1726      | 0.0010  | down    |
| <b>BdMKK10-5</b> | 12.9862     | 0.0000  | up      | 3.5376      | 0.0002  | up      | 5.4003      | 0.0001  | up      | 11.4780     | 0.0000  | up      | 2.8447      | 0.0054  | up      | 5.2509      | 0.0001  | up      |

Additional file 8L Expression data of the *BdMAPKKK* family genes after biotic stresses treatment.

|                   | pH14 4h     |         |         | pH14 12h    |         |         | Guy11 4h    |         |         | Guy11 12h   |         |         | F0968 4h    |         |         | F0968 12h   |         |         |
|-------------------|-------------|---------|---------|-------------|---------|---------|-------------|---------|---------|-------------|---------|---------|-------------|---------|---------|-------------|---------|---------|
|                   | fold-change | p-value | up/down | fold-change | p-value | up/down | fold-change | p-value | up/down | fold-change | p-value | up/down | fold-change | p-value | up/down | fold-change | p-value | up/down |
| <b>BdMAPKKK1</b>  | 0.9199      | 0.7568  |         | 0.4189      | 0.0283  |         | 0.4070      | 0.0186  |         | 1.1249      | 0.0038  |         | 0.9624      | 0.4118  |         | 1.7119      | 0.0297  |         |
| <b>BdMAPKKK2</b>  | 0.7554      | 0.3757  |         | 0.3020      | 0.0040  | down    | 0.3765      | 0.0028  | down    | 0.8900      | 0.1435  |         | 0.4050      | 0.0045  | down    | 0.9957      | 0.9179  |         |
| <b>BdMAPKKK3</b>  | 0.6996      | 0.2561  |         | 0.6921      | 0.2844  |         | 0.5051      | 0.0319  |         | 1.3163      | 0.2942  |         | 0.4806      | 0.0340  |         | 0.7632      | 0.3270  |         |
| <b>BdMAPKKK4</b>  | 1.0555      | 0.7842  |         | 0.9994      | 0.9976  |         | 0.6424      | 0.0600  |         | 1.6179      | 0.0382  |         | 0.6785      | 0.0682  |         | 1.4188      | 0.0887  |         |
| <b>BdMAPKKK5</b>  | 2.7292      | 0.0710  |         | 1.4731      | 0.4410  |         | 1.8456      | 0.2922  |         | 4.4481      | 0.0301  |         | 2.4691      | 0.1301  |         | 2.7155      | 0.0551  |         |
| <b>BdMAPKKK6</b>  | 1.6949      | 0.0755  |         | 1.0081      | 0.9705  |         | 0.8533      | 0.5074  |         | 2.3667      | 0.0169  |         | 0.8347      | 0.4604  |         | 2.3085      | 0.0162  |         |
| <b>BdMAPKKK7</b>  | 1.6573      | 0.2286  |         | 0.9343      | 0.8470  |         | 0.8959      | 0.7262  |         | 2.4107      | 0.0944  |         | 1.2786      | 0.5209  |         | 3.0715      | 0.0193  |         |
| <b>BdMAPKKK8</b>  | 0.6763      | 0.2873  |         | 0.5104      | 0.0750  |         | 0.5015      | 0.0680  |         | 0.7578      | 0.3763  |         | 0.6268      | 0.1682  |         | 1.2040      | 0.6303  |         |
| <b>BdMAPKKK9</b>  | 1.8590      | 0.0688  |         | 1.1802      | 0.5804  |         | 1.0685      | 0.7555  |         | 2.2315      | 0.0161  |         | 1.4721      | 0.1515  |         | 2.0361      | 0.0321  |         |
| <b>BdMAPKKK10</b> | 1.0563      | 0.8481  |         | 0.7581      | 0.3744  |         | 0.6515      | 0.1965  |         | 1.1983      | 0.5363  |         | 0.7633      | 0.3655  |         | 1.2075      | 0.5162  |         |
| <b>BdMAPKKK11</b> | 0.5880      | 0.0619  |         | 0.3453      | 0.0093  | down    | 0.3622      | 0.0065  | down    | 0.7580      | 0.2650  |         | 0.5238      | 0.0357  |         | 1.0881      | 0.7940  |         |
| <b>BdMAPKKK12</b> | 0.6450      | 0.1345  |         | 0.4282      | 0.0239  |         | 0.3152      | 0.0078  | down    | 0.8261      | 0.5871  |         | 0.6120      | 0.2118  |         | 0.6576      | 0.1585  |         |
| <b>BdMAPKKK13</b> | 0.4194      | 0.0027  | down    | 0.3322      | 0.0020  | down    | 0.2703      | 0.0007  | down    | 0.6195      | 0.0660  |         | 0.4276      | 0.0031  | down    | 0.5915      | 0.0284  |         |
| <b>BdMAPKKK14</b> | 0.6023      | 0.2028  |         | 0.3871      | 0.0472  |         | 0.1578      | 0.0109  |         | 0.3660      | 0.0366  |         | 0.3144      | 0.0447  |         | 0.3196      | 0.0360  |         |
| <b>BdMAPKKK15</b> | 0.8324      | 0.3952  |         | 0.3831      | 0.0080  | down    | 0.3190      | 0.0055  | down    | 0.9343      | 0.7440  |         | 0.5779      | 0.0623  |         | 0.6229      | 0.1387  |         |
| <b>BdMAPKKK16</b> | 0.8567      | 0.0722  |         | 0.4571      | 0.0002  | down    | 0.3280      | 0.0001  | down    | 0.8668      | 0.4488  |         | 0.6262      | 0.0626  |         | 0.8517      | 0.1830  |         |
| <b>BdMAPKKK17</b> | 0.7589      | 0.2364  |         | 0.6000      | 0.0622  |         | 0.6357      | 0.0497  |         | 1.6752      | 0.0246  |         | 0.8013      | 0.2042  |         | 1.0047      | 0.9808  |         |
| <b>BdMAPKKK18</b> | 1.4004      | 0.0140  |         | 0.8410      | 0.3340  |         | 0.5392      | 0.0020  |         | 1.4883      | 0.1860  |         | 0.7808      | 0.2770  |         | 1.2049      | 0.3757  |         |
| <b>BdMAPKKK19</b> | 0.9696      | 0.3383  |         | 0.4357      | 0.0000  | down    | 0.3809      | 0.0000  | down    | 0.7220      | 0.0108  |         | 0.4950      | 0.0090  | down    | 0.7976      | 0.0001  |         |
| <b>BdMAPKKK20</b> | 0.8917      | 0.2983  |         | 0.5454      | 0.0478  |         | 0.5416      | 0.0328  |         | 0.9640      | 0.8350  |         | 0.7101      | 0.0334  |         | 0.7675      | 0.4723  |         |
| <b>BdMAPKKK21</b> | 6.3110      | 0.0010  | up      | 3.5020      | 0.0049  | up      | 3.5386      | 0.0052  | up      | 6.7001      | 0.0009  | up      | 3.7510      | 0.0063  | up      | 3.0596      | 0.0247  |         |
| <b>BdMAPKKK22</b> | 0.8408      | 0.6232  |         | 0.5373      | 0.0828  |         | 0.4719      | 0.0581  |         | 0.8417      | 0.5375  |         | 0.9016      | 0.7053  |         | 0.4904      | 0.0030  | down    |
| <b>BdMAPKKK23</b> | 0.1433      | 0.0000  | down    | 0.2606      | 0.0002  | down    | 0.2249      | 0.0000  | down    | 0.3470      | 0.0004  | down    | 0.2318      | 0.0005  | down    | 0.1301      | 0.0000  | down    |
| <b>BdMAPKKK24</b> | 0.1915      | 0.0001  | down    | 0.3254      | 0.0028  | down    | 0.1608      | 0.0000  | down    | 0.3479      | 0.0221  |         | 0.9541      | 0.8785  |         | 0.3632      | 0.0027  | down    |
| <b>BdMAPKKK25</b> | 0.1129      | 0.0066  | down    | 0.2536      | 0.0109  |         | 0.1684      | 0.0066  | down    | 0.2452      | 0.0248  |         | 0.3975      | 0.0639  |         | 0.1516      | 0.0005  | down    |

|                   |         |        |      |         |        |      |        |        |      |         |        |        |         |        |        |        |        |      |
|-------------------|---------|--------|------|---------|--------|------|--------|--------|------|---------|--------|--------|---------|--------|--------|--------|--------|------|
| <b>BdMAPKKK26</b> | 0.2775  | 0.0004 | down | 0.0643  | 0.0000 | down | 0.1948 | 0.0008 | down | 1.0908  | 0.4819 | 0.1702 | 0.0001  | down   | 0.4176 | 0.0304 |        |      |
| <b>BdMAPKKK27</b> | 1.7584  | 0.1327 |      | 1.0513  | 0.8752 |      | 0.6295 | 0.2001 |      | 1.5834  | 0.1986 | 0.8122 | 0.6565  |        | 0.9673 | 0.9311 |        |      |
| <b>BdMAPKKK28</b> | 0.3444  | 0.0195 |      | 0.3489  | 0.0243 |      | 0.2622 | 0.0115 |      | 0.2787  | 0.0086 | down   | 0.3764  | 0.0380 | 0.2628 | 0.0169 |        |      |
| <b>BdMAPKKK29</b> | 0.7312  | 0.0164 |      | 0.3360  | 0.0003 | down | 0.3055 | 0.0002 | down | 0.7594  | 0.1689 | 0.4756 | 0.0314  |        | 0.4741 | 0.0491 |        |      |
| <b>BdMAPKKK30</b> | 0.1871  | 0.0163 |      | 0.2316  | 0.0014 | down | 0.0550 | 0.0002 | down | 0.1988  | 0.0010 | down   | 0.1017  | 0.0002 | down   | 0.1375 | 0.0069 | down |
| <b>BdMAPKKK31</b> | 0.2488  | 0.0002 | down | 0.1853  | 0.0001 | down | 0.1611 | 0.0000 | down | 0.2406  | 0.0002 | down   | 0.1888  | 0.0013 | down   | 0.1956 | 0.0000 | down |
| <b>BdMAPKKK32</b> | 0.5822  | 0.0402 |      | 0.3119  | 0.0033 | down | 0.2345 | 0.0013 | down | 0.6124  | 0.0590 | 0.3981 | 0.0071  | down   | 0.4047 | 0.0230 |        |      |
| <b>BdMAPKKK33</b> | 0.7227  | 0.1497 |      | 0.6004  | 0.1070 |      | 0.4347 | 0.0104 |      | 1.3081  | 0.3283 | 0.8287 | 0.4496  |        | 0.7339 | 0.3064 |        |      |
| <b>BdMAPKKK34</b> | 0.4499  | 0.0348 |      | 0.3545  | 0.0152 |      | 0.2492 | 0.0041 | down | 0.6304  | 0.0954 | 0.4224 | 0.0106  |        | 0.3365 | 0.0011 | down   |      |
| <b>BdMAPKKK35</b> | 1.0858  | 0.8470 |      | 0.8355  | 0.6828 |      | 0.7830 | 0.5319 |      | 1.3837  | 0.4561 | 0.8002 | 0.6479  |        | 0.9675 | 0.9362 |        |      |
| <b>BdMAPKKK36</b> | 1.7503  | 0.1477 |      | 1.2379  | 0.5042 |      | 0.7940 | 0.6127 |      | 2.5827  | 0.0235 | 1.6105 | 0.2354  |        | 0.8283 | 0.5197 |        |      |
| <b>BdMAPKKK37</b> | 1.3712  | 0.2776 |      | 0.6505  | 0.1710 |      | 0.6604 | 0.1699 |      | 1.6682  | 0.1327 | 0.7890 | 0.3946  |        | 0.7095 | 0.2875 |        |      |
| <b>BdMAPKKK38</b> | 0.8969  | 0.7639 |      | 0.5548  | 0.1746 |      | 0.5125 | 0.1112 |      | 1.1406  | 0.7267 | 0.7133 | 0.3977  |        | 0.8506 | 0.6639 |        |      |
| <b>BdMAPKKK39</b> | 1.7429  | 0.1710 |      | 0.7642  | 0.4660 |      | 0.7652 | 0.4625 |      | 1.9593  | 0.1573 | 0.7793 | 0.5313  |        | 1.0909 | 0.8056 |        |      |
| <b>BdMAPKKK40</b> | 0.9827  | 0.9564 |      | 0.5655  | 0.1276 |      | 0.4407 | 0.0526 |      | 1.1232  | 0.7229 | 0.9830 | 0.9571  |        | 0.7822 | 0.4558 |        |      |
| <b>BdMAPKKK41</b> | 0.6056  | 0.0007 |      | 0.4745  | 0.0000 | down | 0.4066 | 0.0007 | down | 0.6641  | 0.0007 | 0.4971 | 0.0001  | down   | 0.4047 | 0.0003 | down   |      |
| <b>BdMAPKKK42</b> | 2.0106  | 0.0052 | up   | 0.1903  | 0.0001 | down | 0.3515 | 0.0003 | down | 0.0511  | 0.0005 | down   | 1.3517  | 0.0292 | 1.1671 | 0.3964 |        |      |
| <b>BdMAPKKK43</b> | 1.1464  | 0.6679 |      | 1.0385  | 0.9055 |      | 0.9268 | 0.8335 |      | 1.3491  | 0.3684 | 0.9200 | 0.7953  |        | 0.9632 | 0.9354 |        |      |
| <b>BdMAPKKK44</b> | 2.0902  | 0.0047 | up   | 0.8502  | 0.2699 |      | 1.0384 | 0.8516 |      | 2.2071  | 0.0117 | 1.5517 | 0.0025  |        | 1.4790 | 0.0255 |        |      |
| <b>BdMAPKKK45</b> | 0.8037  | 0.4784 |      | 0.7277  | 0.3192 |      | 0.5486 | 0.1005 |      | 0.6304  | 0.1899 | 1.0009 | 0.9975  |        | 0.6927 | 0.2971 |        |      |
| <b>BdMAPKKK46</b> | 0.7209  | 0.0686 |      | 0.3921  | 0.0042 | down | 0.4480 | 0.0029 | down | 0.9914  | 0.9476 | 0.6569 | 0.0291  |        | 0.5669 | 0.0250 |        |      |
| <b>BdMAPKKK47</b> | 1.7628  | 0.1599 |      | 0.7247  | 0.3723 |      | 0.9051 | 0.7448 |      | 1.8695  | 0.0999 | 1.5768 | 0.1866  |        | 1.2873 | 0.4411 |        |      |
| <b>BdMAPKKK48</b> | 0.4742  | 0.0070 | down | 0.5184  | 0.0070 |      | 0.3805 | 0.0041 | down | 0.8953  | 0.4551 | 0.6706 | 0.0471  |        | 0.4619 | 0.0350 |        |      |
| <b>BdMAPKKK49</b> | 1.4751  | 0.1665 |      | 0.6873  | 0.1673 |      | 0.6342 | 0.1232 |      | 1.7989  | 0.0649 | 0.9847 | 0.9544  |        | 0.9396 | 0.8296 |        |      |
| <b>BdMAPKKK50</b> | 0.2115  | 0.0081 | down | 0.2514  | 0.0207 |      | 0.1167 | 0.0031 | down | 0.2832  | 0.0285 | 0.4330 | 0.0588  |        | 0.4457 | 0.0733 |        |      |
| <b>BdMAPKKK51</b> | 15.6062 | 0.0000 | up   | 7.7397  | 0.0003 | up   | 5.8440 | 0.0001 | up   | 20.6489 | 0.0000 | up     | 2.0921  | 0.0047 | up     | 1.2613 | 0.1569 |      |
| <b>BdMAPKKK52</b> | 5.5717  | 0.0014 | up   | 1.5404  | 0.0084 |      | 0.0800 | 0.0000 | down | 0.8214  | 0.1441 | 1.1264 | 0.3964  |        | 0.1605 | 0.0049 | down   |      |
| <b>BdMAPKKK53</b> | 7.5337  | 0.0003 | up   | 10.8535 | 0.0000 | up   | 3.4463 | 0.0255 |      | 11.8390 | 0.0004 | up     | 11.6055 | 0.0000 | up     | 1.7144 | 0.0450 |      |
| <b>BdMAPKKK54</b> | 0.3622  | 0.0062 | down | 0.1047  | 0.0012 | down | 0.1821 | 0.0007 | down | 0.4404  | 0.0213 | 0.2119 | 0.0016  | down   | 2.6019 | 0.0028 | up     |      |



|                   |         |        |      |          |        |      |         |        |      |          |        |      |         |        |      |         |        |      |
|-------------------|---------|--------|------|----------|--------|------|---------|--------|------|----------|--------|------|---------|--------|------|---------|--------|------|
| <b>BdMAPKKK55</b> | 2.4710  | 0.0077 | up   | 2.3554   | 0.0023 | up   | 1.7998  | 0.0189 |      | 8.5951   | 0.0049 | up   | 2.5588  | 0.0021 | up   | 2.5857  | 0.0038 | up   |
| <b>BdMAPKKK56</b> | 0.2944  | 0.0000 | down | 0.1762   | 0.0000 | down | 0.1309  | 0.0002 | down | 0.4181   | 0.0000 | down | 0.2500  | 0.0000 | down | 0.2136  | 0.0000 | down |
| <b>BdMAPKKK57</b> | 0.4722  | 0.0023 | down | 0.2307   | 0.0004 | down | 0.1694  | 0.0010 | down | 0.5287   | 0.0010 |      | 1.4192  | 0.0338 |      | 0.1073  | 0.0005 | down |
| <b>BdMAPKKK58</b> | 59.4767 | 0.0002 | up   | 123.5010 | 0.0000 | up   | 74.5925 | 0.0002 | up   | 217.7818 | 0.0000 | up   | 87.4904 | 0.0000 | up   | 66.3592 | 0.0000 | up   |
| <b>BdMAPKKK59</b> | 67.3139 | 0.0000 | up   | 26.2491  | 0.0000 | up   | 20.0294 | 0.0000 | up   | 0.4901   | 0.0004 | down | 14.5715 | 0.0000 | up   | 0.0702  | 0.0000 | down |
| <b>BdMAPKKK60</b> | 0.2995  | 0.0000 | down | 0.3934   | 0.0028 | down | 0.1481  | 0.0210 |      | 0.2221   | 0.0001 | down | 0.0005  | 0.0000 | down | 0.1005  | 0.0000 | down |
| <b>BdMAPKKK61</b> | 0.4305  | 0.1967 |      | 10.2148  | 0.0205 |      | 0.0022  | 0.0004 | down | 2.6898   | 0.1630 |      | 7.1934  | 0.0226 |      | 7.1411  | 0.0249 |      |
| <b>BdMAPKKK62</b> | 0.4461  | 0.1582 |      | 0.2958   | 0.0381 |      | 0.2687  | 0.0530 |      | 0.6825   | 0.4430 |      | 0.3918  | 0.0532 |      | 0.2089  | 0.0106 |      |
| <b>BdMAPKKK63</b> | 1.9791  | 0.0022 |      | 0.8397   | 0.4445 |      | 0.8379  | 0.0321 |      | 2.2033   | 0.0002 | up   | 1.2912  | 0.1866 |      | 1.3410  | 0.1563 |      |
| <b>BdMAPKKK64</b> | 0.7359  | 0.0014 |      | 0.5335   | 0.0000 |      | 0.4061  | 0.0000 | down | 0.6766   | 0.0004 |      | 0.6181  | 0.0000 |      | 0.5865  | 0.0000 |      |
| <b>BdMAPKKK65</b> | 0.5684  | 0.1090 |      | 0.4687   | 0.0546 |      | 0.3717  | 0.0183 |      | 0.8481   | 0.5028 |      | 0.5295  | 0.0473 |      | 0.4270  | 0.0262 |      |
| <b>BdMAPKKK66</b> | 0.2572  | 0.0353 |      | 0.4534   | 0.0978 |      | 0.1344  | 0.0017 | down | 0.7346   | 0.5211 |      | 0.6131  | 0.1596 |      | 0.6665  | 0.2900 |      |
| <b>BdMAPKKK67</b> | 0.5632  | 0.1844 |      | 0.2795   | 0.0131 |      | 0.1973  | 0.0039 | down | 0.9418   | 0.8471 |      | 0.5408  | 0.0513 |      | 0.3922  | 0.0296 |      |
| <b>BdMAPKKK68</b> | 6.9316  | 0.0126 |      | 3.4126   | 0.0390 |      | 2.8640  | 0.0721 |      | 2.1548   | 0.2078 |      | 2.6647  | 0.1074 |      | 5.4533  | 0.0184 |      |
| <b>BdMAPKKK69</b> | 29.6064 | 0.0003 | up   | 16.1694  | 0.0001 | up   | 16.1917 | 0.0001 | up   | 26.9639  | 0.0002 | up   | 5.9153  | 0.0009 | up   | 3.4385  | 0.0045 | up   |
| <b>BdMAPKKK70</b> | 1.0804  | 0.7305 |      | 0.6472   | 0.1076 |      | 0.4608  | 0.0221 |      | 1.7515   | 0.0797 |      | 0.7348  | 0.2438 |      | 0.4829  | 0.0390 |      |
| <b>BdMAPKKK71</b> | 0.2448  | 0.0000 | down | 0.3512   | 0.0010 | down | 0.1428  | 0.0000 | down | 0.4836   | 0.0001 | down | 0.4855  | 0.0033 | down | 0.2515  | 0.0000 | down |
| <b>BdMAPKKK72</b> | 0.1778  | 0.0075 | down | 0.1438   | 0.0009 | down | 0.0789  | 0.0006 | down | 0.5046   | 0.0553 |      | 0.3031  | 0.0053 | down | 0.1406  | 0.0027 | down |
| <b>BdMAPKKK73</b> | 3.8417  | 0.0004 | up   | 1.7212   | 0.1846 |      | 0.7187  | 0.0082 |      | 6.0975   | 0.0003 | up   | 0.5200  | 0.0034 |      | 3.0967  | 0.0195 |      |
| <b>BdMAPKKK74</b> | 0.6965  | 0.4692 |      | 0.2820   | 0.0734 |      | 0.4555  | 0.1499 |      | 0.9185   | 0.8493 |      | 0.4985  | 0.1935 |      | 0.5094  | 0.1324 |      |
| <b>BdMAPKKK75</b> | 1.2167  | 0.1590 |      | 0.5304   | 0.0190 |      | 0.6257  | 0.0571 |      | 1.5676   | 0.0187 |      | 0.9606  | 0.7361 |      | 0.8798  | 0.3251 |      |
