# Supplementary material for: Genome-wide exploration of the molecular evolution and regulatory network of mitogen-activated protein kinase cascades upon multiple stresses in Brachypodium distachyon
Source: PubMed Central journal article supplement (PMC4404688; doi:10.1186/s12864-015-1452-1), 2015-03-24
Supplement: 12864_2015_1452_MOESM9_ESM.pdf [file 12864_2015_1452_MOESM9_ESM.pdf]

|         |        |          |               |          |          |          |          |                  |          |                              |          |          |                  |          |         |
|---------|--------|----------|---------------|----------|----------|----------|----------|------------------|----------|------------------------------|----------|----------|------------------|----------|---------|
|         |        | MAPKKK28 |               |          |          |          |          |                  |          |                              |          |          |                  |          |         |
|         |        | MAPKKK38 |               |          |          |          |          |                  |          |                              |          |          |                  |          |         |
|         |        | MAPKKK43 |               |          |          |          |          |                  |          |                              |          |          |                  |          |         |
|         |        | MAPKKK46 |               |          |          |          |          |                  |          |                              |          |          |                  |          |         |
|         | MAPKKs |          |               | MKK10-5  |          | MKK5     |          | MKK1             | MKK6     |                              |          |          |                  |          |         |
|         | MAPKs  | MPK16    | MPK3<br>MPK17 |          | MPK4     |          | MPK7-2   | MPK11<br>MPK20-1 | MPK20-4  | MPK7-1<br>MPK20-2<br>MPK20-5 |          |          |                  |          |         |
| Hormone | MAPKKs | MAPKKK1  | MAPKKK12      | MAPKKK14 | MAPKKK6  | MAPKKK11 | MAPKKK18 | MAPKKK26         | MAPKKK30 | MAPKKK5                      | MAPKKK34 | MAPKKK27 | MAPKKK19         | MAPKKK21 |         |
|         |        | MAPKKK2  | MAPKKK15      | MAPKKK23 | MAPKKK17 | MAPKKK24 | MAPKKK43 | MAPKKK50         | MAPKKK66 | MAPKKK44                     |          |          | MAPKKK62         | MAPKKK51 |         |
|         |        | MAPKKK7  |               | MAPKKK28 | MAPKKK65 | MAPKKK25 |          |                  | MAPKKK71 | MAPKKK49                     |          |          | MAPKKK64         | MAPKKK53 |         |
|         |        | MAPKKK8  |               | MAPKKK45 |          | MAPKKK33 |          |                  |          |                              |          |          | MAPKKK70         | MAPKKK63 |         |
|         |        | MAPKKK9  |               | MAPKKK48 |          |          |          |                  |          |                              |          |          |                  | MAPKKK72 |         |
|         |        | MAPKKK10 |               | MAPKKK56 |          |          |          |                  |          |                              |          |          |                  |          |         |
|         |        | MAPKKK13 |               | MAPKKK57 |          |          |          |                  |          |                              |          |          |                  |          |         |
|         |        | MAPKKK16 |               | MAPKKK74 |          |          |          |                  |          |                              |          |          |                  |          |         |
|         |        | MAPKKK20 |               |          |          |          |          |                  |          |                              |          |          |                  |          |         |
|         |        | MAPKKK22 |               |          |          |          |          |                  |          |                              |          |          |                  |          |         |
|         |        | MAPKKK29 |               |          |          |          |          |                  |          |                              |          |          |                  |          |         |
|         |        | MAPKKK31 |               |          |          |          |          |                  |          |                              |          |          |                  |          |         |
|         |        | MAPKKK32 |               |          |          |          |          |                  |          |                              |          |          |                  |          |         |
|         |        | MAPKKK38 |               |          |          |          |          |                  |          |                              |          |          |                  |          |         |
|         |        | MAPKKK39 |               |          |          |          |          |                  |          |                              |          |          |                  |          |         |
|         |        | MAPKKK47 |               |          |          |          |          |                  |          |                              |          |          |                  |          |         |
|         |        | MAPKKK68 |               |          |          |          |          |                  |          |                              |          |          |                  |          |         |
|         |        | MAPKKK75 |               |          |          |          |          |                  |          |                              |          |          |                  |          |         |
|         |        | MAPKKs   |               | MKK10-3  | MKK10-1  |          | MKK1     |                  | MKK6     | MKK4<br>MKK5                 |          | MKK10-5  | MKK3-1<br>MKK3-2 |          | MKK10-2 |
|         |        | MAPKs    | MPK4          |          |          | MPK7-1   | MPK11    | MPK7-2           | MPK16    | MPK6                         | MPK3     |          | MPK21-1          | MPK17    |         |

|             |         |                                                                    |                                                                                                                                |                                                                                                                                                                      |                                  |                      |                                                                                                                                             |                                                         |                      |                    |  |  |  |  |
|-------------|---------|--------------------------------------------------------------------|--------------------------------------------------------------------------------------------------------------------------------|----------------------------------------------------------------------------------------------------------------------------------------------------------------------|----------------------------------|----------------------|---------------------------------------------------------------------------------------------------------------------------------------------|---------------------------------------------------------|----------------------|--------------------|--|--|--|--|
|             |         |                                                                    |                                                                                                                                |                                                                                                                                                                      | MPK20-5                          | MPK14<br>MPK20-4     |                                                                                                                                             | MPK20-1<br>MPK20-2<br>MPK20-3                           |                      |                    |  |  |  |  |
| Heavy Metal | MAPKKs  |                                                                    | MAPKKK3<br>MAPKKK8<br>MAPKKK11<br>MAPKKK13<br>MAPKKK18<br>MAPKKK26<br>MAPKKK36<br>MAPKKK48<br>MAPKKK50<br>MAPKKK61<br>MAPKKK66 | MAPKKK10<br>MAPKKK19<br>MAPKKK20<br>MAPKKK32<br>MAPKKK35<br>MAPKKK37<br>MAPKKK45<br>MAPKKK51<br>MAPKKK52<br>MAPKKK58<br>MAPKKK67<br>MAPKKK69<br>MAPKKK71<br>MAPKKK72 | MAPKKK25<br>MAPKKK57<br>MAPKKK63 | MAPKKK28<br>MAPKKK42 | MAPKKK1<br>MAPKKK22<br>MAPKKK29<br>MAPKKK30<br>MAPKKK34<br>MAPKKK39<br>MAPKKK40<br>MAPKKK41<br>MAPKKK49<br>MAPKKK53<br>MAPKKK64<br>MAPKKK74 | MAPKKK16<br>MAPKKK27<br>MAPKKK31<br>MAPKKK4<br>MAPKKK73 | MAPKKK14<br>MAPKKK44 | MAPKKK60           |  |  |  |  |
|             | MAPKKs  | MKK1                                                               |                                                                                                                                |                                                                                                                                                                      | MKK6                             | MKK5                 | MKK3-3<br>MKK10-2<br>MKK10-5                                                                                                                | MKK4                                                    | MKK3-1<br>MKK3-2     | MKK10-1<br>MKK10-3 |  |  |  |  |
|             | MAPKs   | MPK4<br>MPK11<br>MPK16<br>MPK20-1<br>MPK20-2<br>MPK20-4<br>MPK20-5 | MPK17                                                                                                                          | MPK3<br>MPK6                                                                                                                                                         | MPK7-1<br>MPK20-3                |                      | MPK7-2<br>MPK14                                                                                                                             |                                                         | MPK21-1              |                    |  |  |  |  |
| Tissue      | MAPKKKs | MAPKKK8<br>MAPKKK10                                                | MAPKKK1<br>MAPKKK22                                                                                                            | MAPKKK3<br>MAPKKK12                                                                                                                                                  | MAPKKK4<br>MAPKKK6               | MAPKKK2<br>MAPKKK11  | MAPKKK9<br>MAPKKK23                                                                                                                         |                                                         |                      |                    |  |  |  |  |

|     |         |                      |                                            |                                     |                         |                                        |                      |                                  |                     |  |  |  |  |
|-----|---------|----------------------|--------------------------------------------|-------------------------------------|-------------------------|----------------------------------------|----------------------|----------------------------------|---------------------|--|--|--|--|
|     |         | MAPKKK16             | MAPKKK31                                   | MAPKKK14                            | MAPKKK7                 | MAPKKK15                               | MAPKKK25             |                                  |                     |  |  |  |  |
|     |         | MAPKKK37             | MAPKKK32                                   | MAPKKK19                            | MAPKKK18                | MAPKKK17                               | MAPKKK48             |                                  |                     |  |  |  |  |
|     |         | MAPKKK44             | MAPKKK38                                   | MAPKKK27                            | MAPKKK24                | MAPKKK20                               | MAPKKK53             |                                  |                     |  |  |  |  |
|     |         | MAPKKK47             | MAPKKK40                                   | MAPKKK34                            | MAPKKK26                | MAPKKK28                               | MAPKKK56             |                                  |                     |  |  |  |  |
|     |         | MAPKKK49             | MAPKKK64                                   | MAPKKK35                            | MAPKKK30                | MAPKKK29                               | MAPKKK59             |                                  |                     |  |  |  |  |
|     |         | MAPKKK75             |                                            | MAPKKK39                            | MAPKKK33                | MAPKKK36                               | MAPKKK60             |                                  |                     |  |  |  |  |
|     |         |                      |                                            | MAPKKK51                            | MAPKKK41                | MAPKKK42                               | MAPKKK62             |                                  |                     |  |  |  |  |
|     |         |                      |                                            | MAPKKK66                            | MAPKKK43                | MAPKKK46                               | MAPKKK65             |                                  |                     |  |  |  |  |
|     |         |                      |                                            |                                     | MAPKKK45                | MAPKKK50                               | MAPKKK68             |                                  |                     |  |  |  |  |
|     |         |                      |                                            |                                     | MAPKKK52                | MAPKKK63                               | MAPKKK69             |                                  |                     |  |  |  |  |
|     |         |                      |                                            |                                     | MAPKKK54                | MAPKKK67                               | MAPKKK70             |                                  |                     |  |  |  |  |
|     |         |                      |                                            |                                     | MAPKKK55                | MAPKKK74                               |                      |                                  |                     |  |  |  |  |
|     |         |                      |                                            |                                     | MAPKKK57                |                                        |                      |                                  |                     |  |  |  |  |
|     |         |                      |                                            |                                     | MAPKKK58                |                                        |                      |                                  |                     |  |  |  |  |
|     |         |                      |                                            |                                     | MAPKKK61                |                                        |                      |                                  |                     |  |  |  |  |
|     |         |                      |                                            |                                     | MAPKKK71                |                                        |                      |                                  |                     |  |  |  |  |
|     |         |                      |                                            |                                     | MAPKKK72                |                                        |                      |                                  |                     |  |  |  |  |
|     |         |                      |                                            |                                     | MAPKKK73                |                                        |                      |                                  |                     |  |  |  |  |
|     | MAPKKs  |                      | MKK3-1<br>MKK3-3<br>MKK6<br>MKK10-2        | MKK1<br>MKK3-2                      | MKK4<br>MKK5<br>MKK10-5 | MKK10-3                                | MKK10-1              |                                  |                     |  |  |  |  |
|     | MAPKs   | MPK17                | MPK3<br>MPK6<br>MPK7-2<br>MPK14<br>MPK20-4 | MPK4<br>MPK16<br>MPK20-1<br>MPK20-3 | MPK7-1                  | MPK11<br>MPK20-2<br>MPK20-5<br>MPK21-1 |                      |                                  |                     |  |  |  |  |
| All | MAPKKKs | MAPKKK23<br>MAPKKK25 | MAPKKK57<br>MAPKKK66                       |                                     | MAPKKK35<br>MAPKKK37    |                                        | MAPKKK24<br>MAPKKK33 | MAPKKK26<br>MAPKKK21<br>MAPKKK55 | MAPKKK63<br>MAPKKK6 |  |  |  |  |

|            |         |                                  |                              |                                     |                                                                                              |                                  |                                                                                                          |                                  |                                  |         |         |  |  |
|------------|---------|----------------------------------|------------------------------|-------------------------------------|----------------------------------------------------------------------------------------------|----------------------------------|----------------------------------------------------------------------------------------------------------|----------------------------------|----------------------------------|---------|---------|--|--|
|            |         | MAPKKK28<br>MAPKKK48<br>MAPKKK56 | MAPKKK71                     |                                     | MAPKKK39<br>MAPKKK49                                                                         |                                  | MAPKKK50                                                                                                 |                                  |                                  |         |         |  |  |
|            | MAPKKs  |                                  | MKK5                         | MKK6                                |                                                                                              | MKK3-1<br>MKK3-2<br>MKK3-3       |                                                                                                          | MKK1<br>MKK10-3                  | MKK10-5                          | MKK10-2 |         |  |  |
|            | MAPKs   | MPK4                             |                              | MPK6<br>MPK16<br>MPK20-3<br>MPK20-4 | MPK3<br>MPK17                                                                                | MPK7-2<br>MPK21-1                | MPK7-1<br>MPK20-2<br>MPK20-5                                                                             | MPK11                            |                                  |         | MPK20-1 |  |  |
| All+Tissue | MAPKKKs | MAPKKK2<br>MAPKKK13<br>MAPKKK15  | MAPKKK24<br>MAPKKK33         |                                     | MAPKKK43<br>MAPKKK55<br>MAPKKK57<br>MAPKKK59<br>MAPKKK60<br>MAPKKK61<br>MAPKKK68<br>MAPKKK73 | MAPKKK14<br>MAPKKK29<br>MAPKKK34 | MAPKKK20<br>MAPKKK30<br>MAPKKK36<br>MAPKKK41<br>MAPKKK45<br>MAPKKK46<br>MAPKKK71<br>MAPKKK72<br>MAPKKK74 | MAPKKK26<br>MAPKKK50<br>MAPKKK66 | MAPKKK53<br>MAPKKK58<br>MAPKKK69 |         |         |  |  |
|            | MAPKKs  |                                  | MKK1                         | MKK6                                | MKK10-1                                                                                      |                                  | MKK5                                                                                                     | MKK4<br>MKK10-3                  | MKK10-5                          |         |         |  |  |
|            | MAPKs   | MPK4                             | MPK7-1<br>MPK20-2<br>MPK20-5 | MPK20-1<br>MPK20-4                  |                                                                                              | MPK16<br>MPK20-3<br>MPK21-1      | MPK11                                                                                                    |                                  |                                  |         |         |  |  |

\* The same color background indicated the same group of co-expression genes in corresponding treatment, respectively. “All” means the expression levels of all kind of treatment, and “Tissue” means the tissue specific expression. MAPKKK genes were marked in blue; MAPKK genes were marked in red; and MAPK genes were marked in cyan.
