# Supplementary material for: Genome-wide exploration of the molecular evolution and regulatory network of mitogen-activated protein kinase cascades upon multiple stresses in Brachypodium distachyon
Source: PubMed Central journal article supplement (PMC4404688; doi:10.1186/s12864-015-1452-1), 2015-03-24
Supplement: 12864_2015_1452_MOESM10_ESM.pdf [file 12864_2015_1452_MOESM10_ESM.pdf]

**Additional file 10 The list of qRT-PCR primers of MAPK cascades genes.**

| Genename   | Genemodel    | ForwardPrimer          | RewardPrimer             |
|------------|--------------|------------------------|--------------------------|
| BdMAPKKK1  | Bradi5g24870 | CCTGTGCGAACCTGTTCCCTC  | CCACATAAAGACGAAAGTGGGC   |
| BdMAPKKK2  | Bradi1g28950 | GTCTTGCAGCGCAACAAAAT   | TCCATGGAAGGGTGCCTCTC     |
| BdMAPKKK3  | Bradi3g60210 | GCTGTTCTGCATTACCCCT    | ATGCTGGCTTCATGCTCTGT     |
| BdMAPKKK4  | Bradi1g47570 | CGGCTCAGGTTGCTGGTTAT   | GCTGTTGCGGCACATAAGAG     |
| BdMAPKKK5  | Bradi3g59510 | AAGCGGTTGCGTCATCCTAA   | TGCCATTCTTAAGCGCCTCT     |
| BdMAPKKK6  | Bradi1g74480 | GCTGCAGGATCAACCACCAT   | TGTCCATGAATCTGTGCGAGTGG  |
| BdMAPKKK7  | Bradi1g45040 | GCATCTTCAATGGTCGTCGC   | CCGGACAGATTCACTTGCCT     |
| BdMAPKKK8  | Bradi5g18180 | AAGCTGACATTCTGAGCCCC   | ATGCTGAGTCCAAGGTGTG      |
| BdMAPKKK9  | Bradi1g30720 | AGGGGCAAGCTCATAACCAAC  | TTGCTCAGATGGCTTCCCAG     |
| BdMAPKKK10 | Bradi2g46340 | TCGGTCTTTCTCGAGCGATG   | AGCCGTGACCCCTTATTAGC     |
| BdMAPKKK11 | Bradi3g51380 | GTGGTCTCTGAAGCTGGCAT   | GGTTGCGTATGAGGTGTGGA     |
| BdMAPKKK12 | Bradi3g27120 | TGGCCAGAGGCATGAATTGT   | ATTGCTCGTTCCGCAAACC      |
| BdMAPKKK13 | Bradi3g09170 | CCTTGCGCATGTATGAAGC    | ACCCCTACAGATGTCACGGA     |
| BdMAPKKK14 | Bradi3g08260 | TCTGGATTTCGAACAGTGGAGG | CGCCAGAACTTTTGATTAGCA    |
| BdMAPKKK15 | Bradi4g04470 | GCTTTGGATGTTGCAAGGGG   | CATCCATTGAGGCGTTCCTT     |
| BdMAPKKK16 | Bradi1g23970 | AGAGGTCCTTCTGATCGCCT   | CCTACTTGCCCCGTTTGTGAGT   |
| BdMAPKKK17 | Bradi4g38400 | CCTGTGAAAGGGCAAGCAAC   | ATGCCAGTCAGCAGATGAA      |
| BdMAPKKK18 | Bradi3g44710 | TGTTGCTGTCAGCTTCTCGT   | AGGCTGGCTGCTAAGAGAGA     |
| BdMAPKKK19 | Bradi1g07650 | CTGGGTCATTGGCTCATCGT   | ATGAGCTGCAGAACCAGGAC     |
| BdMAPKKK20 | Bradi5g21330 | ATGGCACCAGAGTTTCTCCG   | TTTTGGAATGCAACCGCTCC     |
| BdMAPKKK21 | Bradi4g36880 | GTCTTCAAGCTCCCTGCCTT   | TGTTCAATGACCTCTGGGGC     |
| BdMAPKKK22 | Bradi2g39350 | CATACCGGCACCAAGGAAGT   | AGTGTCTGCCAGTGAATCC      |
| BdMAPKKK23 | Bradi4g29500 | GCTGCAGCAAGCAATTCTCA   | ACTTTCTTTGCCTCTCCGCA     |
| BdMAPKKK24 | Bradi1g60340 | AGGGCACAAGGGAATGAAGG   | TGCTCCTGTAGCTTGATGGC     |
| BdMAPKKK25 | Bradi3g36080 | GTGCACAGCTTCGCCATTAG   | GGCAGCCTTCATTCCGTAGT     |
| BdMAPKKK26 | Bradi1g58810 | GCCGTCCTTGCAAATACCCA   | GGGCTGCATACAGGACTTGA     |
| BdMAPKKK27 | Bradi4g22760 | GTGCTAGAGGAAGGGCGTTT   | TTTCTGTGATTTCGGCCA       |
| BdMAPKKK28 | Bradi3g51460 | TTCTGTGCAGCTTGTTGGGA   | CCAGTTCTGAACCAGGCGAT     |
| BdMAPKKK29 | Bradi1g10970 | GGATGGCACCTGAGGTTGTT   | AGCTGGGAATAGGAGGTCGT     |
| BdMAPKKK30 | Bradi3g01850 | TGATGATTCTTCGACCCCG    | GGTGAGCCCTGAAAGAACCA     |
| BdMAPKKK31 | Bradi2g06260 | CCCGACAAGAGGCCAGATTT   | CCAACCGGATAAAACAGCGG     |
| BdMAPKKK32 | Bradi2g19590 | ATGACTCCAGTCCAAGCAGC   | ACTCGGGCTCTTATCTGGT      |
| BdMAPKKK33 | Bradi3g48360 | GGAAGTACGCCGCATTAGA    | TTCAAGCGGGTTCAGCTCAT     |
| BdMAPKKK34 | Bradi1g67400 | ACTTATGCCAAGGCAGGACC   | GCAGAACGGTCGATACATGC     |
| BdMAPKKK35 | Bradi2g49700 | GGATGGCTCCGGAGATGATG   | AGCTAACAGGGATGGTTGGC     |
| BdMAPKKK36 | Bradi2g57470 | TGAGCTCCACAGGAACGAAC   | TAGCCATGGTGTGTGTGTCC     |
| BdMAPKKK37 | Bradi3g05520 | TGGGATTGTCTTGTGGGAGC   | CGCATTCTCAAGCATGCACA     |
| BdMAPKKK38 | Bradi3g18150 | AGGAAGCCAATGGTCTGGTG   | TGCCACGTGCAACATCTAGT     |
| BdMAPKKK39 | Bradi1g28110 | GGGAGCTACTGGCAGGAAAG   | TTGGTCTTAGGGCGGGATCT     |
| BdMAPKKK40 | Bradi2g49790 | AAAATCCTGCTGACAGGCCA   | CCCTCGAAGCTCAGGAAACA     |
| BdMAPKKK41 | Bradi1g14000 | TGAGGTCACAAAGGCCTCAC   | AGAAAATGACATCTGCTGAACACC |
| BdMAPKKK42 | Bradi1g35350 | ACAGCATGGAATCCTGGTCCG  | GTAGATGCCCCGGTAGATGC     |
| BdMAPKKK43 | Bradi1g04080 | AGATTGGGGAGGGAGCTCAT   | GTTCTTGAAGCCCCAATG       |
| BdMAPKKK44 | Bradi5g10670 | TACCTCCAGCAGCCCAATTC   | TCCTGCCAAGGGTCTGAAAC     |

|            |              |                       |                       |
|------------|--------------|-----------------------|-----------------------|
| BdMAPKKK45 | Bradi3g47600 | TGTCTAAATTGCCCGCCAT   | CACCAACCCCACTTCTAGCC  |
| BdMAPKKK46 | Bradi2g44910 | TCAGCATTCGCACAAGAGGT  | CTCAACCACAACGCAGCAA   |
| BdMAPKKK47 | Bradi2g15560 | GGGGCCCTTGATGGATGAAT  | GGGCTTGTGAGAGATCACA   |
| BdMAPKKK48 | Bradi2g00670 | GATATCCCAATGCTGGGCGA  | GAGATGCAGATCGTCGGAGG  |
| BdMAPKKK49 | Bradi1g20390 | GAGCTATGTTGGGATGCGGA  | AATGCCAGTGGTGATCGTGT  |
| BdMAPKKK50 | Bradi4g44430 | CGCATGTTCTTCAACACCGT  | TAATTGTTGAGCTTGCCGCC  |
| BdMAPKKK51 | Bradi2g47510 | TTCGGTCCCTTGAGTGAAGC  | CTAGCCACAAGGACACCCAG  |
| BdMAPKKK52 | Bradi2g47480 | TAGTGTGCTGGCGACTGA    | GACAGTATCCCTTGCTCCCG  |
| BdMAPKKK53 | Bradi2g47490 | GCGGGTGTGCTGTAGGATTA  | TTCGGCGGAACCTGTCAGAT  |
| BdMAPKKK54 | Bradi1g23320 | GTGCAGATCTACCACAGCGT  | GGAGAAAAAGGGGTCGAGCA  |
| BdMAPKKK55 | Bradi2g47500 | TGGATTCCCTTGCTCCCGATG | GGCGAAGAGATCGCTCATGT  |
| BdMAPKKK56 | Bradi4g41940 | AGCTCCAGTGGCTGAAAGAC  | TTCAGCAGGAAATCGCCCTT  |
| BdMAPKKK57 | Bradi3g10890 | GGCCACACAAAGAGATGGGA  | CATGCCAAATCCGTCCGTTC  |
| BdMAPKKK58 | Bradi2g17820 | GAAGCAGATAATAATTCTTTG | ATGGTACAGCTTCGTCCGGCT |
| BdMAPKKK59 | Bradi2g17830 | TGCAAGTTCGGATTCCGCTA  | TCACGAGTTGAGGGCTTTGC  |
| BdMAPKKK60 | Bradi1g65500 | ATCGACTCGACGAAACTCGC  | GACCAGACGTCAGAAGCCG   |
| BdMAPKKK61 | Bradi1g41850 | AATTAGCAACCCTCAGGCC   | ACTGGCGTGTGCTCTACTTC  |
| BdMAPKKK62 | Bradi4g09990 | GAGCACAGATAGCCAGGGTC  | CTAACGCCTCGACTGTCTC   |
| BdMAPKKK63 | Bradi3g45660 | GGAAATCCAAGCGACGCAG   | ACGCTCATCATCTTTTCGGC  |
| BdMAPKKK64 | Bradi4g02900 | CTTGACTGGCGAGGAACCAT  | AGCATTGCTCCATCAGGCTT  |
| BdMAPKKK65 | Bradi1g00580 | TGCACCTATGGGGACAGTA   | CACGGTTCCAAAAGTGCCAG  |
| BdMAPKKK66 | Bradi1g14010 | AAACTGCTGCTGCCTTTGTG  | TGCCATCATGCTAACCACACA |
| BdMAPKKK67 | Bradi3g45790 | TCCCAGTAGAGGCAAGACA   | TTGAGGCGAAGGGTAAGCTG  |
| BdMAPKKK68 | Bradi2g17800 | ATAGACAGGGCAATTGGGGC  | CACGCATGCGAAAGTCAAC   |
| BdMAPKKK69 | Bradi2g17840 | GACAGCAGCGATGTAGGACA  | ACCTGAAACTTTGGGCGAGAG |
| BdMAPKKK70 | Bradi3g57740 | AGGCTCTTTGGCGGCTTAT   | TGACCGACCCATTTGCATCA  |
| BdMAPKKK71 | Bradi4g24830 | GAGAGCGCTACATCTGGTGC  | TACTCTGCTTTCCCGGCATC  |
| BdMAPKKK72 | Bradi4g24840 | GATGCCGGGAAAGCAGAGTA  | ACATGACGATATGCGGGTGT  |
| BdMAPKKK73 | Bradi3g13050 | CGCAGGATATACGAGCACCT  | AGGATACTCCGGTGGAGGAG  |
| BdMAPKKK74 | Bradi3g13060 | TAGCTGCTGCTTTTCCCAA   | AGAAGGAACTACACGCTGCC  |
| BdMAPKKK75 | Bradi4g41870 | GCTGGGAAACCATCCCATCA  | TTTGCCGAGGTGGAGACATC  |
| BdMKK1     | Bradi1g51000 | CAAATTCCTGACGCAGAGCG  | CGAACCAGTTGCACGATTCC  |
| BdMKK3-1   | Bradi4g39490 | ACATTCCAAGCAAGCGGGTA  | CCAATAAGGTTCCACCATG   |
| BdMKK3-2   | Bradi1g41860 | GAGATCCATGGGGTGCTACT  | AAGGTTTCCACCATGACAGC  |
| BdMKK3-3   | Bradi3g11260 | ATAGCCATCGAGGAATCGC   | ATGCAATGCACTTCTCTC    |
| BdMKK4     | Bradi3g53650 | AGGTTCGTCCCTATCGTCCA  | GGTTCCCGTAGAGCACCTTG  |
| BdMKK5     | Bradi1g46880 | TGAAGCAGCTCTACGGGAAC  | TTGGATTGATCCTGGGACCG  |
| BdMKK6     | Bradi1g75150 | TGGCCGCTTCCCCTATACTC  | CGCGGGATCCTTTTGTATG   |
| BdMKK10-1  | Bradi1g11525 | GTACGCCCTCAAGGTGCAG   | GGAACTGGGAGAACGCCTC   |
| BdMKK10-2  | Bradi1g69400 | GGGACTTGTAGGCGAAACGA  | CGCCACATGGGACAGGTTAT  |
| BdMKK10-3  | Bradi1g10800 | GTGCTGTCTGACGGTGAGG   | CAACAAACGGGTGAGCCAG   |
| BdMKK10-5  | Bradi1g10790 | GGAGCTCAGGGGATTCATCG  | CCATATTCCTCCCGGCGAC   |
| BdMPK3     | Bradi1g65810 | TCCCCTCCAGAGGATCACAG  | TGGTCTTCCGTCAAAGGGTG  |
| BdMPK4     | Bradi3g32000 | TCAGCCATTGACCGATGACC  | CAAGCCCAAAGTCCGCAATC  |
| BdMPK6     | Bradi1g49100 | TGGAGCTCAGTTTCGGCATT  | TACGCAGAAGTTCGACCACC  |
| BdMPK7-1   | Bradi1g34030 | GCCTCTCAGATCTGCTGCT   | TCTCCGATGGGCTTGATCG   |

|           |              |                        |                        |
|-----------|--------------|------------------------|------------------------|
| BdMPK7-2  | Bradi4g24912 | TATGACCCAAGTGCGAACCC   | GCCGAACATGTCAAGACCCT   |
| BdMPK11   | Bradi3g16560 | TGTGCACTCAGCGAATGTCT   | CCGATACCACCGGGTAACAA   |
| BdMPK14   | Bradi3g03780 | GCCCATCGACCTCGACTTAG   | ATCGCAGTAGGGCCTTTGAG   |
| BdMPK16   | Bradi2g36470 | ACTTGAGCAGTATGAGGCGG   | GCGGAAGGCTCTCTATCCAC   |
| BdMPK17   | Bradi1g34700 | AGAAAGAGGTTCTCCGCTGC   | TTGCGCTCTTCTGGTAGCTC   |
| BdMPK20-1 | Bradi2g44350 | CGTATTGGCCCATCAAGGGA   | TACGGATGACTGGTGCCAAC   |
| BdMPK20-2 | Bradi2g15317 | GCTCTGTGGATCCTTTTTTACG | TACGGACCCGCGAAATTGTA   |
| BdMPK20-3 | Bradi1g41780 | CTGCCAAGGCAAGCCTTCAAC  | CAGGCACATGTTGTGGTGGG   |
| BdMPK20-4 | Bradi2g45870 | AACTGGGAAGCCTTTTGTTC   | AGGGTCTGCTTTGGGGAATC   |
| BdMPK20-5 | Bradi2g16337 | CGGTTGCATTTTTGCGGAGA   | GCGCTGAAGGATCTGCATTG   |
| BdMPK21-1 | Bradi2g15620 | AAGCATGGAGATGGTGACTACA | CTCCGAAAGGGAATCCTCATC  |
| BdActin   | Bradi2g24070 | CCCGATGGACAGGTTATCACTA | ATAGAGCCACCAATCCAAACAC |
