# Supplementary material for: Genome-wide exploration of the molecular evolution and regulatory network of mitogen-activated protein kinase cascades upon multiple stresses in Brachypodium distachyon
Source: BMC Genomics. 2015 Mar 24;16(1):228. doi: 10.1186/s12864-015-1452-1 (PMC4404688; doi:10.1186/s12864-015-1452-1)
Supplement: Additional file 6: — Alignment of MAPKKKs from O. sativa, A. thaliana and B. distachyon. [file 12864_2015_1452_MOESM6_ESM.pdf]

A

[illegible]

**B** GTPEEFMAPE(L/M/V)(F/L/Y)

```

BdMAPKKK56 :  FVNGCGGVKIGDGLATLQ-Q-QRTKSTFQFEMAPELITGVNNEIVDI
OsmAPKKK52 :  FVNGCGGVKIGDGLATLQ-Q-Q-KSIFQFEMAPELITGHNEIVDI
OsmAPKKK46 :  FVNGCGGVKIGDGLATLQ-Q-QRRTRISQFEMAPELGGNNEIVDI
AtZ1K6 :      FVNGCGGVKIGDGLATLQ-Q-QPTRSVLQFEMAPELGBNNEIVDI
AtZ1K10 :     FVNGCGGVKIGDGLATLQ-Q-QPTRSVLQFEMAPELGBNNEIVDI
AtZ1K5 :      FVNGCGGVKIGDGLATLQ-Q-QANKSVLQFEMAPELDNNNEIVDI
AtZ1K7 :      FVNGCGGVKIGDGLATLQ-Q-QANKSVLQFEMAPELDNNNEIVDI
BdMAPKKK28 :  FVNGCGGVKIGDGLATLNR-T-QPRKSVLQFEMAPELDNNDNEIVDI
OsmAPKKK29 :  FVNGCGGVKIGDGLATLNL-T-QPRKSVLQFEMAPELDNNDNEIVDI
OsmAPKKK36 :  FVNGCGGVKIGDGLATLNA-RSHSLGTFEMAPELDSENNNEIVDI
OsmAPKKK56 :  FVNGCGGVKIGDGLATLNA-RSHSLGTFEMAPELDSENNNEIVDI
BdMAPKKK22 :  FVNGCGGVKIGDGLATLNA-RSHSLGTFEMAPELDSENNNEIVDI
AtZ1K11 :     FVNGCGGVKIGDGLATLNA-RSHSLGTFEMAPELDSENNNEIVDI
OsmAPKKK50 :  FVNGCGGVKIGDGLATLNA-RSHSLGTFEMAPELDSENNNEIVDI
OsmAPKKK53 :  FVNGCGGVKIGDGLATLNA-RSHSLGTFEMAPELDSENNNEIVDI
BdMAPKKK50 :  FVNGCGGVKIGDGLATLNGARASQHSVIGTFEMABENEDNNGVGVVDI
AtZ1K1 :      FVNGCGGVKIGDGLATLNGRQSHSVIGTFEMABENEDNNGVGVVDI
AtZ1K2 :      FVNGCGGVKIGDGLATLRDCSHSLGTFEMABELFENNNEIVDI
BdMAPKKK16 :  FVNGCGGVKIGDGLATLRKS-HVHVCQTFEMABEVEFENNNEIVDI
OsmAPKKK20 :  FVNGCGGVKIGDGLATLRKS-HVHVCQTFEMABEVEFENNNEIVDI
AtZ1K4 :      FVNGCGGVKIGDGLATLRKS-HVHVCQTFEMABEVEFENNNEIVDI
AtZ1K9 :      FVNGCGGVKIGDGLATLRKS-HVHVCQTFEMABEVEFENNNEIVDI
AtZ1K3 :      FVNGCGGVKIGDGLATLRKS-HVHVCQTFEMABEVEFENNNEIVDI
OsmAPKKK47 :  FVNGCGGVKIGDGLAAPPGRQ-QGHARCQTFEMAPEVDSENNNEIVDI
BdMAPKKK54 :  FVNGCGGVKIGDGLAAPPKTK-HVHTHTLQFEMAPELTGNNNEIVDI
OsmAPKKK64 :  FVNGCGGVKIGDGLAAPPKTK-HVHTHTLQFEMAPELTGNNNEIVDI
AtZ1K8 :      FVNGCGGVKIGDGLAAPPKTK-HLHSLGTFEMAPELBNNNEIVDI

```

C C/T/C)P-(W/E)MAREV

| G17/S1P(X)W7F1MAPEV |                 |     |
|---------------------|-----------------|-----|
| 01B0APKK660         | TAADAAK---GGGLG | 172 |
| 01B0APKK673         | AAAAAAA-----    | 173 |
| 01B0APKK683         | ADVAER--SGRLG   | 174 |
| 01B0APKK685         | ADVAER--SGRLG   | 175 |
| 01B0APKK686         | ADVAER--SGRLG   | 176 |
| 01B0APKK687         | ADVAER--SGRLG   | 177 |
| 01B0APKK688         | ADVAER--SGRLG   | 178 |
| 01B0APKK689         | ADVAER--SGRLG   | 179 |
| 01B0APKK690         | ADVAER--SGRLG   | 180 |
| 01B0APKK691         | ADVAER--SGRLG   | 181 |
| 01B0APKK692         | ADVAER--SGRLG   | 182 |
| 01B0APKK693         | ADVAER--SGRLG   | 183 |
| 01B0APKK694         | ADVAER--SGRLG   | 184 |
| 01B0APKK695         | ADVAER--SGRLG   | 185 |
| 01B0APKK696         | ADVAER--SGRLG   | 186 |
| 01B0APKK697         | ADVAER--SGRLG   | 187 |
| 01B0APKK698         | ADVAER--SGRLG   | 188 |
| 01B0APKK699         | ADVAER--SGRLG   | 189 |
| 01B0APKK700         | ADVAER--SGRLG   | 190 |
| 01B0APKK701         | ADVAER--SGRLG   | 191 |
| 01B0APKK702         | ADVAER--SGRLG   | 192 |
| 01B0APKK703         | ADVAER--SGRLG   | 193 |
| 01B0APKK704         | ADVAER--SGRLG   | 194 |
| 01B0APKK705         | ADVAER--SGRLG   | 195 |
| 01B0APKK706         | ADVAER--SGRLG   | 196 |
| 01B0APKK707         | ADVAER--SGRLG   | 197 |
| 01B0APKK708         | ADVAER--SGRLG   | 198 |
| 01B0APKK709         | ADVAER--SGRLG   | 199 |
| 01B0APKK710         | ADVAER--SGRLG   | 200 |
| 01B0APKK711         | ADVAER--SGRLG   | 201 |
| 01B0APKK712         | ADVAER--SGRLG   | 202 |
| 01B0APKK713         | ADVAER--SGRLG   | 203 |
| 01B0APKK714         | ADVAER--SGRLG   | 204 |
| 01B0APKK715         | ADVAER--SGRLG   | 205 |
| 01B0APKK716         | ADVAER--SGRLG   | 206 |
| 01B0APKK717         | ADVAER--SGRLG   | 207 |
| 01B0APKK718         | ADVAER--SGRLG   | 208 |
| 01B0APKK719         | ADVAER--SGRLG   | 209 |
| 01B0APKK720         | ADVAER--SGRLG   | 210 |
| 01B0APKK721         | ADVAER--SGRLG   | 211 |
| 01B0APKK722         | ADVAER--SGRLG   | 212 |
| 01B0APKK723         | ADVAER--SGRLG   | 213 |
| 01B0APKK724         | ADVAER--SGRLG   | 214 |
| 01B0APKK725         | ADVAER--SGRLG   | 215 |
| 01B0APKK726         | ADVAER--SGRLG   | 216 |
| 01B0APKK727         | ADVAER--SGRLG   | 217 |
| 01B0APKK728         | ADVAER--SGRLG   | 218 |
| 01B0APKK729         | ADVAER--SGRLG   | 219 |
| 01B0APKK730         | ADVAER--SGRLG   | 220 |
| 01B0APKK731         | ADVAER--SGRLG   | 221 |
| 01B0APKK732         | ADVAER--SGRLG   | 222 |
| 01B0APKK733         | ADVAER--SGRLG   | 223 |
| 01B0APKK734         | ADVAER--SGRLG   | 224 |
| 01B0APKK735         | ADVAER--SGRLG   | 225 |
| 01B0APKK736         | ADVAER--SGRLG   | 226 |
| 01B0APKK737         | ADVAER--SGRLG   | 227 |
| 01B0APKK738         | ADVAER--SGRLG   | 228 |
| 01B0APKK739         | ADVAER--SGRLG   | 229 |
| 01B0APKK740         | ADVAER--SGRLG   | 230 |
| 01B0APKK741         | ADVAER--SGRLG   | 231 |
| 01B0APKK742         | ADVAER--SGRLG   | 232 |
| 01B0APKK743         | ADVAER--SGRLG   | 233 |
| 01B0APKK744         | ADVAER--SGRLG   | 234 |
| 01B0APKK745         | ADVAER--SGRLG   | 235 |
| 01B0APKK746         | ADVAER--SGRLG   | 236 |
| 01B0APKK747         | ADVAER--SGRLG   | 237 |
| 01B0APKK748         | ADVAER--SGRLG   | 238 |
| 01B0APKK749         | ADVAER--SGRLG   | 239 |
| 01B0APKK750         | ADVAER--SGRLG   | 240 |
| 01B0APKK751         | ADVAER--SGRLG   | 241 |
| 01B0APKK752         | ADVAER--SGRLG   | 242 |
| 01B0APKK753         | ADVAER--SGRLG   | 243 |
| 01B0APKK754         | ADVAER--SGRLG   | 244 |
| 01B0APKK755         | ADVAER--SGRLG   | 245 |
| 01B0APKK756         | ADVAER--SGRLG   | 246 |
| 01B0APKK757         | ADVAER--SGRLG   | 247 |
| 01B0APKK758         | ADVAER--SGRLG   | 248 |
| 01B0APKK759         | ADVAER--SGRLG   | 249 |
| 01B0APKK760         | ADVAER--SGRLG   | 250 |
| 01B0APKK761         | ADVAER--SGRLG   | 251 |
| 01B0APKK762         | ADVAER--SGRLG   | 252 |
| 01B0APKK763         | ADVAER--SGRLG   | 253 |
| 01B0APKK764         | ADVAER--SGRLG   | 254 |
| 01B0APKK765         | ADVAER--SGRLG   | 255 |
| 01B0APKK766         | ADVAER--SGRLG   | 256 |
| 01B0APKK767         | ADVAER--SGRLG   | 257 |
| 01B0APKK768         | ADVAER--SGRLG   | 258 |
| 01B0APKK769         | ADVAER--SGRLG   | 259 |
| 01B0APKK770         | ADVAER--SGRLG   | 260 |
| 01B0APKK771         | ADVAER--SGRLG   | 261 |
| 01B0APKK772         | ADVAER--SGRLG   | 262 |
| 01B0APKK773         | ADVAER--SGRLG   | 263 |
| 01B0APKK774         | ADVAER--SGRLG   | 264 |
| 01B0APKK775         | ADVAER--SGRLG   | 265 |
| 01B0APKK776         | ADVAER--SGRLG   | 266 |
| 01B0APKK777         | ADVAER--SGRLG   | 267 |
| 01B0APKK778         | ADVAER--SGRLG   | 268 |
| 01B0APKK779         | ADVAER--SGRLG   | 269 |
| 01B0APKK780         | ADVAER--SGRLG   | 270 |
| 01B0APKK781         | ADVAER--SGRLG   | 271 |
| 01B0APKK782         | ADVAER--SGRLG   | 272 |
| 01B0APKK783         | ADVAER--SGRLG   | 273 |
| 01B0APKK784         | ADVAER--SGRLG   | 274 |
| 01B0APKK785         | ADVAER--SGRLG   |     |
